# Supplementary material for: Synthesis of fluoro-benzoxazepines via an I(iii)/BF3·Et2O-enabled 1,2-aryl migration/fluorination cascade
Source: Royal Society of Chemistry journal article supplement (doi:10.1039/d4qo00715h), 2024-01-01

# Synthesis of Fluoro-Benzoxazepines via I(III)/BF<sub>3</sub>·Et<sub>2</sub>O Enabled 1,2-Aryl Migration/Fluorination Cascade

Jiaxin He,<sup>a</sup> Haofeng Shi,<sup>a</sup> Jialiang Wu,<sup>a</sup> Dan Xiao,<sup>a</sup> Kaiyue yang,<sup>a</sup> Yuli Sun,<sup>a</sup> and Yunfei Du<sup>\*,a</sup>

---

<sup>a</sup> Tianjin Key Laboratory for Modern Drug Delivery & High-Efficiency, School of Pharmaceutical Science and Technology, Faculty of Medicine, Tianjin University, Tianjin 300072, China; Email: duyunfeier@tju.edu.cn.

## Supporting Information

|            |                                                       |          |
|------------|-------------------------------------------------------|----------|
| <b>I</b>   | General Information                                   | S1       |
| <b>II</b>  | Experimental Procedures and Spectroscopic Data        | S2-S35   |
| <b>III</b> | X-ray Crystal Structure and Data of Product <b>2u</b> | S36-S46  |
| <b>IV</b>  | References                                            | S47      |
| <b>V</b>   | NMR Spectra of Starting Materials and Products        | S48-S187 |

## I. General Information

$^1\text{H}$ ,  $^{13}\text{C}$  and  $^{19}\text{F}$  NMR spectra were recorded on a 400 MHz or 600 MHz spectrometer at 25 °C.  $\text{CDCl}_3$  and  $\text{DMSO}-d_6$  were used as NMR solvents. Chemical shifts values are given in ppm and referred as the internal standard to TMS: 0.00 ppm. Chemical shifts were expressed in parts per million ( $\delta$ ) downfield from the internal standard tetramethylsilane, and were reported as s (singlet), d (doublet), t (triplet), q (quadruple), dd (doublet of doublet), m (multiplet), etc. The coupling constants  $J$ , are reported in Hertz (Hz). High resolution mass spectrometry (HRMS) data were recorded on Q Exactive HF (Q Exactive<sup>TM</sup> HF/UltiMate<sup>TM</sup> 3000 RSLCnano) using electron spray ionization (ESI) in positive (or negative) mode. Melting points were determined with a Micromelting point apparatus. TLC plates were visualized by exposure to ultraviolet light. Reagents and solvents were purchased as reagent grade and were used without further purification. All reactions were performed in standard glassware, heated at 70 °C for 3 h before used. Flash column chromatography was performed over silica gel (200-300 m) using a mixture of ethyl acetate (EtOAc) and petroleum ether (PE).

## II. Experimental Procedures and Spectroscopic Data

### 1. Synthesis of Starting Materials

General procedure for preparation of substrates **1a-b**, **1g-1y**, **1ab** and **1ac**.<sup>[1-5]</sup>

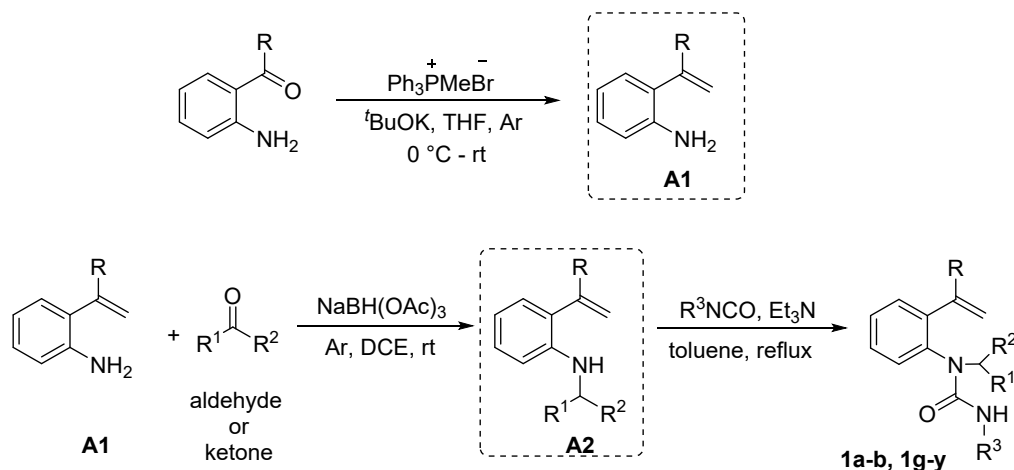

#### Method A:

**A1:** To a suspension of methyltriphenylphosphonium bromide (1.5 equiv) in anhydrous THF (200 mL), potassium *tert*-butoxide (2.0 equiv) was added portion-wisely at 0 °C under argon atmosphere. The mixture was stirred at 0 °C for 1 h. Then 2-amino ketone (1.0 equiv.) was added at the same temperature. The mixture was allowed to warm overnight to ambient temperature. The reaction was quenched by the addition of an aqueous saturated solution of NH<sub>4</sub>Cl. The aqueous phase was extracted with EtOAc (30 mL×3). The combined organic layer was washed with brine (30 mL), dried over anhydrous Na<sub>2</sub>SO<sub>4</sub>, and concentrated in vacuum. The residue was purified by flash chromatography on silica gel (EtOAc/PE = 1/15) to give the product 2-alkenyl aniline **A1**.

**A2:** 2-Alkenyl aniline (**A1**, 1.0 equiv) and aldehyde or ketone (1.2 equiv) were mixed in 1,2-dichloroethane (DCE) and then treated with NaBH(OAc)<sub>3</sub> (1.5 equiv). The mixture was stirred at room temperature under a nitrogen atmosphere for 4-6 h. The reaction mixture was then quenched by addition of aqueous saturated NaHCO<sub>3</sub>. The aqueous phase was extracted with EtOAc (30 mL×3). The combined organic layer was washed with brine (30 mL), dried over anhydrous Na<sub>2</sub>SO<sub>4</sub>, and concentrated in vacuum.

The residue was purified by flash chromatography on silica gel (EtOAc/PE = 1/30) to give the product **A2**.

**1a-b, 1g-y**: To a solution of compound **A2** (500 mg, 1.0 equiv) in toluene (10.0 mL) were added benzyl isocyanate (1.5 equiv) and Et<sub>3</sub>N (2.0 equiv) at room temperature. The mixture was heated to reflux and maintained at this temperature for 12 h. The solvent was evaporated under reduced pressure and the residue was quenched by addition of brine (30 mL). The aqueous phase was extracted with EtOAc (30 mL×3). The combined organic layer was dried over anhydrous Na<sub>2</sub>SO<sub>4</sub>, and concentrated in vacuum. The residue was purified by flash chromatography on silica gel (EtOAc/PE = 1/7 ~ 1/5) to give the compound **1a-b, 1g-y**.

### 1,3-Dibenzyl-1-(2-(prop-1-en-2-yl)phenyl)urea

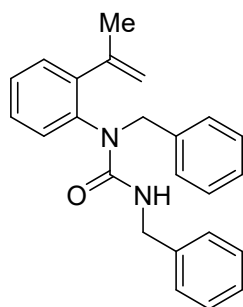

**1a** (614 mg, 77% yield, colorless liquid).

<sup>1</sup>H NMR (400 MHz, CDCl<sub>3</sub>) δ 7.31 – 7.18 (m, 12H), 7.10 (td, *J* = 7.6, 1.7 Hz, 1H), 6.79 (dd, *J* = 7.8, 1.3 Hz, 1H), 5.55 (d, *J* = 14.6 Hz, 1H), 5.21 – 5.19 (m, 1H), 5.02 – 5.00 (m, 1H), 4.58 (s, 1H), 4.41 (t, *J* = 5.4 Hz, 2H), 4.00 (d, *J* = 14.7 Hz, 1H), 2.04 (s, 3H).  
<sup>13</sup>C NMR (101 MHz, CDCl<sub>3</sub>) δ 157.2, 143.4, 142.7, 139.5, 138.5, 137.6, 130.9, 130.5, 128.9, 128.5, 128.3, 128.3, 128.2, 127.5, 127.1, 127.1, 116.7, 52.0, 44.9, 23.1. HRMS (ESI) calcd for C<sub>24</sub>H<sub>24</sub>N<sub>2</sub>NaO<sup>+</sup> [M + Na<sup>+</sup>] 379.1781, found 379.1783.

### 1,3-Dibenzyl-1-(2-(but-1-en-2-yl)phenyl)urea

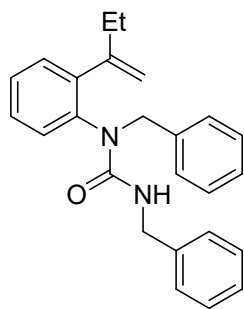

**1b** (648 mg, 83% yield, colorless liquid).

$^1\text{H}$  NMR (400 MHz,  $\text{CDCl}_3$ )  $\delta$  7.37 – 7.24 (m, 12H), 7.16 (td,  $J = 7.5, 2.0$  Hz, 1H), 6.89 – 6.85 (m, 1H), 5.62 (d,  $J = 14.7$  Hz, 1H), 5.28 (d,  $J = 1.5$  Hz, 1H), 5.09 (s, 1H), 4.71 (t,  $J = 5.8$  Hz, 1H), 4.52 (t,  $J = 7.3$  Hz, 1H), 4.47 – 4.39 (m, 1H), 4.08 (d,  $J = 14.7$  Hz, 1H), 2.43 (dq,  $J = 32.1, 7.3$  Hz, 2H), 1.08 (t,  $J = 7.4$  Hz, 3H).  $^{13}\text{C}$  NMR (101 MHz,  $\text{CDCl}_3$ )  $\delta$  157.2, 149.7, 142.6, 139.6, 138.6, 137.6, 131.1, 130.9, 128.9, 128.5, 128.3, 128.3, 127.6, 127.2, 127.1, 114.4, 65.9, 52.0, 44.9, 29.1, 12.9. HRMS (ESI) calcd for  $\text{C}_{25}\text{H}_{26}\text{N}_2\text{NaO}^+$  [ $\text{M} + \text{Na}^+$ ] 393.1937, found 393.1935.

### 3-Benzyl-1-ethyl-1-(2-(prop-1-en-2-yl)phenyl)urea

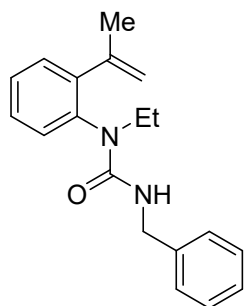

**1g** (484 mg, 53% yield, a white solid, mp: 76 – 78 °C).

$^1\text{H}$  NMR (400 MHz,  $\text{CDCl}_3$ )  $\delta$  7.33 – 7.24 (m, 5H), 7.24 – 7.15 (m, 4H), 5.17 – 5.12 (m, 1H), 4.97 (s, 1H), 4.50 (t,  $J = 5.9$  Hz, 1H), 4.39 (d,  $J = 4.8$  Hz, 2H), 4.20 (dq,  $J = 14.7, 7.3$  Hz, 1H), 3.06 (dq,  $J = 14.3, 6.9$  Hz, 1H), 2.01 (s, 3H), 1.10 (t,  $J = 7.1$  Hz, 3H).  $^{13}\text{C}$  NMR (101 MHz,  $\text{CDCl}_3$ )  $\delta$  156.8, 143.4, 142.9, 139.7, 137.9, 130.7, 130.6, 128.5, 128.3, 127.5, 127.1, 116.5, 44.7, 43.2, 23.0, 13.7. HRMS (ESI) calcd for  $\text{C}_{19}\text{H}_{22}\text{N}_2\text{NaO}^+$  [ $\text{M} + \text{Na}^+$ ] 317.1624, found 317.1620.

### 3-Benzyl-1-isopropyl-1-(2-(prop-1-en-2-yl)phenyl)urea

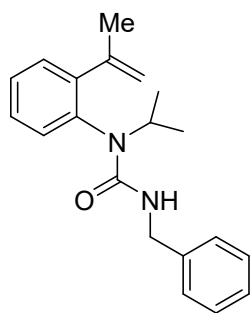

**1h** (581 mg, 66% yield, colorless liquid).

$^1\text{H}$  NMR (400 MHz,  $\text{CDCl}_3$ )  $\delta$  7.35 (m, 2H), 7.33 – 7.25 (m, 3H), 7.24 – 7.19 (m, 3H), 7.17 – 7.12 (m, 1H), 5.18 – 5.15 (m, 1H), 5.03 (s, 1H), 4.53 (hept,  $J = 6.7$  Hz, 1H), 4.38 (m, 3H), 2.06 (s, 3H), 1.26 (d,  $J = 6.2$  Hz, 3H), 1.07 (d,  $J = 6.5$  Hz, 3H).  $^{13}\text{C}$  NMR (101 MHz,  $\text{CDCl}_3$ )  $\delta$  157.1, 144.1, 143.7, 139.7, 136.3, 131.6, 130.5, 128.5, 128.4, 128.3, 127.5, 127.0, 117.1, 49.8, 44.6, 23.4, 22.0, 20.3. HRMS (ESI) calcd for  $\text{C}_{20}\text{H}_{24}\text{N}_2\text{NaO}^+$  [ $\text{M} + \text{Na}^+$ ] 331.1781, found 331.1783.

### 3-Benzyl-1-butyl-1-(2-(prop-1-en-2-yl)phenyl)urea

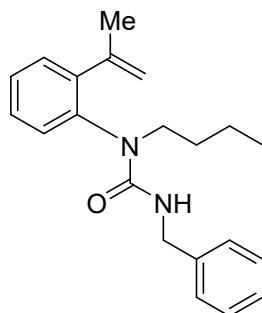

**1i** (605 mg, 71% yield, colorless liquid).

$^1\text{H}$  NMR (400 MHz,  $\text{CDCl}_3$ )  $\delta$  7.39 – 7.25 (m, 5H), 7.25 – 7.16 (m, 4H), 5.18 – 5.14 (m, 1H), 4.97 (s, 1H), 4.51 (t,  $J = 5.5$  Hz, 1H), 4.41 – 4.36 (m, 2H), 4.15 (m, 1H), 3.01 – 2.91 (m, 1H), 2.01 (s, 3H), 1.59 (m, 1H), 1.48 – 1.35 (m, 1H), 1.30 (m, 2H), 0.89 (t,  $J = 7.3$  Hz, 3H).  $^{13}\text{C}$  NMR (101 MHz,  $\text{CDCl}_3$ )  $\delta$  157.0, 143.3, 142.7, 139.7, 138.1, 130.7, 130.6, 128.4, 128.4, 128.2, 127.5, 127.1, 116.5, 48.2, 44.7, 30.6, 23.0, 20.2, 13.9. HRMS (ESI) calcd for  $\text{C}_{21}\text{H}_{26}\text{N}_2\text{NaO}^+$  [ $\text{M} + \text{Na}^+$ ] 345.1937, found 345.1933.

### 3-Benzyl-1-isobutyl-1-(2-(prop-1-en-2-yl)phenyl)urea

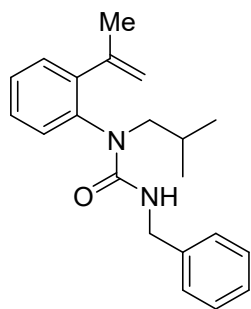

**1j** (451 mg, 53% yield, colorless liquid).

$^1\text{H}$  NMR (400 MHz,  $\text{CDCl}_3$ )  $\delta$  7.28 (m, 5H), 7.23 – 7.17 (m, 4H), 5.15 (s, 1H), 4.97 (s, 1H), 4.58 (s, 1H), 4.38 (dd,  $J = 5.5, 3.1$  Hz, 2H), 4.02 (m, 1H), 2.82 (m, 1H), 1.99 (s, 3H), 1.70 (m, 1H), 0.97 (d,  $J = 6.5$  Hz, 3H), 0.82 (d,  $J = 6.6$  Hz, 3H).  $^{13}\text{C}$  NMR (101 MHz,  $\text{CDCl}_3$ )  $\delta$  157.4, 143.3, 142.5, 139.8, 138.2, 130.8, 130.8, 128.4, 128.3, 128.2, 127.5, 127.1, 116.6, 55.0, 44.8, 27.4, 22.9, 20.4, 20.2. HRMS (ESI) calcd for  $\text{C}_{21}\text{H}_{26}\text{N}_2\text{NaO}^+$  [ $\text{M} + \text{Na}^+$ ] 345.1937, found 345.1939.

### 3-Benzyl-1-pentyl-1-(2-(prop-1-en-2-yl)phenyl)urea

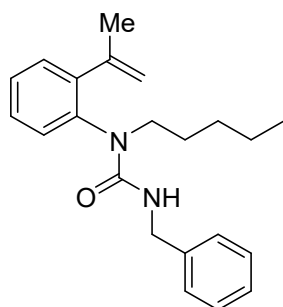

**1k** (472 mg, 57% yield, colorless liquid).

$^1\text{H}$  NMR (400 MHz,  $\text{CDCl}_3$ )  $\delta$  7.29 (m, 3H), 7.27 – 7.24 (m, 2H), 7.22 – 7.14 (m, 4H), 5.17 – 5.12 (m, 1H), 4.96 (s, 1H), 4.50 (t,  $J = 5.6$  Hz, 1H), 4.38 (d,  $J = 5.8$  Hz, 2H), 4.12 (m, 1H), 3.01 – 2.90 (m, 1H), 2.00 (s, 3H), 1.65 – 1.37 (m, 2H), 1.24 (m, 4H), 0.85 (t,  $J = 6.9$  Hz, 3H).  $^{13}\text{C}$  NMR (101 MHz,  $\text{CDCl}_3$ )  $\delta$  157.0, 143.4, 142.7, 139.7, 138.1, 130.6, 128.4, 128.4, 128.2, 127.5, 127.0, 116.5, 48.4, 44.7, 29.1, 28.1, 23.0, 22.5, 14.1. HRMS (ESI) calcd for  $\text{C}_{22}\text{H}_{28}\text{N}_2\text{NaO}^+$  [ $\text{M} + \text{Na}^+$ ] 359.2094, found 359.2097.

### 3-Benzyl-1-cyclopentyl-1-(2-(prop-1-en-2-yl)phenyl)urea

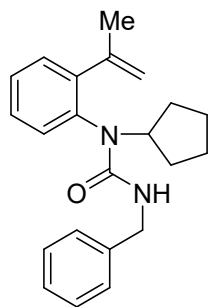

**1l** (540 mg, 66% yield, a white solid, mp: 72 - 74 °C).

$^1\text{H}$  NMR (400 MHz,  $\text{CDCl}_3$ )  $\delta$  7.34 – 7.29 (m, 2H), 7.29 – 7.27 (m, 1H), 7.26 – 7.22 (m, 2H), 7.21 – 7.16 (m, 3H), 7.13 (dt,  $J = 7.1, 2.7$  Hz, 1H), 5.15 – 5.12 (m, 1H), 4.99 (s, 1H), 4.47 – 4.39 (m, 1H), 4.38 – 4.31 (m, 3H), 2.07 (s, 1H), 2.03 (s, 3H), 1.87 – 1.76 (m, 1H), 1.51 (m, 5H), 1.33 (m, 1H).  $^{13}\text{C}$  NMR (101 MHz,  $\text{CDCl}_3$ )  $\delta$  157.3, 143.9, 143.5, 139.7, 137.1, 131.3, 130.4, 128.5, 128.5, 128.4, 127.5, 127.0, 117.0, 60.0, 44.6, 31.0, 29.5, 23.5, 23.3, 23.2. HRMS (ESI) calcd for  $\text{C}_{22}\text{H}_{26}\text{N}_2\text{NaO}^+$  [ $\text{M} + \text{Na}^+$ ] 357.1937, found 357.1934.

### 3-Benzyl-1-cyclohexyl-1-(2-(prop-1-en-2-yl)phenyl)urea

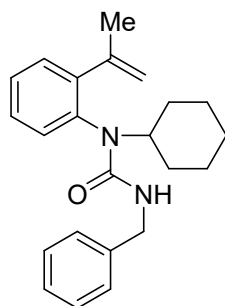

**1m** (542 mg, 67% yield, a white solid, mp: 95 - 97 °C).

$^1\text{H}$  NMR (400 MHz, Chloroform-*d*)  $\delta$  7.38 – 7.25 (m, 5H), 7.24 – 7.19 (m, 3H), 7.15 – 7.11 (m, 1H), 5.16 – 5.14 (m, 1H), 5.03 (s, 1H), 4.38 (m, 2H), 4.31 (d,  $J = 9.6$  Hz, 1H), 4.18 (m, 1H), 2.05 (s, 3H), 2.02 (s, 1H), 1.88 (d,  $J = 10.8$  Hz, 1H), 1.78 – 1.65 (m, 2H), 1.57 (d,  $J = 12.8$  Hz, 1H), 1.31 (m, 3H), 1.15 – 1.05 (m, 1H), 0.99 (m, 1H).  $^{13}\text{C}$  NMR (101 MHz,  $\text{CDCl}_3$ )  $\delta$  157.2, 144.2, 143.7, 139.7, 136.3, 131.9, 130.4, 128.4, 128.4, 128.2, 127.5, 127.0, 117.1, 57.7, 44.6, 32.3, 30.8, 26.1, 25.6, 23.5. HRMS (ESI) calcd for  $\text{C}_{23}\text{H}_{28}\text{N}_2\text{NaO}^+$  [ $\text{M} + \text{Na}^+$ ] 371.2094, found 371.2097.



### 3-Benzyl-1-(cyclohexylmethyl)-1-(2-(prop-1-en-2-yl)phenyl)urea

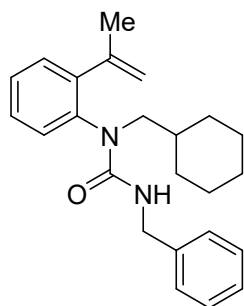

**1n** (506 mg, 64% yield, colorless liquid).

$^1\text{H}$  NMR (400 MHz,  $\text{CDCl}_3$ )  $\delta$  7.32 – 7.23 (m, 5H), 7.23 – 7.16 (m, 4H), 5.16 – 5.13 (m, 1H), 4.96 (s, 1H), 4.56 (t,  $J = 5.5$  Hz, 1H), 4.38 (d,  $J = 5.8$  Hz, 2H), 4.05 (m, 1H), 2.81 (dd,  $J = 13.8, 5.2$  Hz, 1H), 1.98 (s, 3H), 1.86 (m, 1H), 1.72 (s, 1H), 1.67 – 1.50 (m, 3H), 1.49 – 1.40 (m, 1H), 1.20 (t,  $J = 7.0$  Hz, 1H), 1.11 (m, 3H), 0.92 – 0.84 (m, 1H).  $^{13}\text{C}$  NMR (101 MHz,  $\text{CDCl}_3$ )  $\delta$  157.4, 143.3, 142.5, 139.8, 138.4, 130.8, 130.7, 128.4, 128.4, 128.1, 127.5, 127.0, 116.6, 54.1, 44.8, 36.9, 31.1, 30.9, 26.6, 26.0, 25.9, 23.0. HRMS (ESI) calcd for  $\text{C}_{24}\text{H}_{30}\text{N}_2\text{NaO}^+$  [ $\text{M} + \text{Na}^+$ ] 385.2250, found 385.2246.

### 3-Benzyl-1-(4-chlorobenzyl)-1-(2-(prop-1-en-2-yl)phenyl)urea

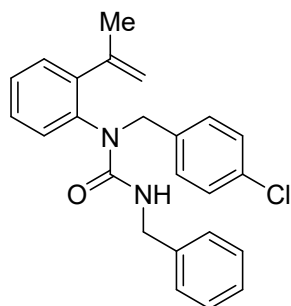

**1o** (515 mg, 68% yield, colorless liquid).

$^1\text{H}$  NMR (400 MHz,  $\text{CDCl}_3$ )  $\delta$  7.33 – 7.26 (m, 4H), 7.25 – 7.20 (m, 5H), 7.18 – 7.12 (m, 3H), 6.78 (dd,  $J = 7.8, 1.0$  Hz, 1H), 5.50 (d,  $J = 14.8$  Hz, 1H), 5.24 – 5.20 (m, 1H), 5.02 (s, 1H), 4.60 (t,  $J = 5.3$  Hz, 1H), 4.46 – 4.39 (m, 2H), 2.05 (s, 3H).  $^{13}\text{C}$  NMR (101 MHz,  $\text{CDCl}_3$ )  $\delta$  157.1, 143.3, 142.6, 139.4, 137.4, 137.0, 133.0, 130.7, 130.6, 130.3, 128.5, 128.4, 128.4, 127.5, 127.2, 116.8, 51.3, 44.9, 23.0. HRMS (ESI) calcd for  $\text{C}_{24}\text{H}_{23}^{35}\text{ClN}_2\text{NaO}^+$  [ $\text{M} + \text{Na}^+$ ] 413.1391, found 413.1394.

### 3-Benzyl-1-(4-methoxybenzyl)-1-(2-(prop-1-en-2-yl)phenyl)urea

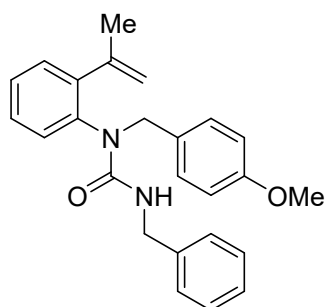

**1p** (519 mg, 68% yield, colorless liquid).

$^1\text{H}$  NMR (400 MHz,  $\text{CDCl}_3$ )  $\delta$  7.24 – 7.10 (m, 7H), 7.08 – 6.99 (m, 3H), 6.72 – 6.65 (m, 3H), 5.41 (d,  $J = 14.5$  Hz, 1H), 5.13 – 5.09 (m, 1H), 4.92 (s, 1H), 4.47 (t,  $J = 5.6$  Hz, 1H), 4.33 (dd,  $J = 9.6, 5.8$  Hz, 2H), 3.85 (m, 1H), 3.68 (s, 3H), 1.96 (s, 3H).  $^{13}\text{C}$  NMR (101 MHz,  $\text{CDCl}_3$ )  $\delta$  158.7, 157.1, 143.4, 142.7, 139.6, 137.6, 131.0, 130.7, 130.5, 130.2, 128.5, 128.3, 127.5, 127.1, 116.7, 113.6, 55.2, 51.3, 44.9, 23.1. HRMS (ESI) calcd for  $\text{C}_{25}\text{H}_{26}\text{N}_2\text{NaO}_2^+$  [ $\text{M} + \text{Na}^+$ ] 409.1886, found 409.1889.

### 3-(3-Bromophenyl)-1-(4-methoxybenzyl)-1-(2-(prop-1-en-2-yl)phenyl)urea

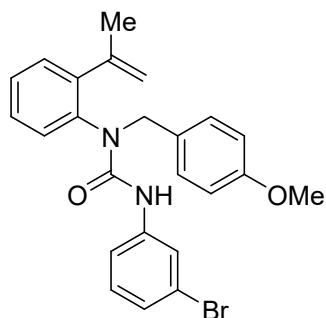

**1q** (454 mg, 51% yield, colorless liquid).

$^1\text{H}$  NMR (400 MHz,  $\text{CDCl}_3$ )  $\delta$  7.57 (s, 1H), 7.42 – 7.32 (m, 2H), 7.21 (td,  $J = 7.6, 1.6$  Hz, 1H), 7.16 (dt,  $J = 6.3, 2.4$  Hz, 3H), 7.12 – 7.03 (m, 2H), 6.84 (d,  $J = 7.7$  Hz, 1H), 6.79 (d,  $J = 8.6$  Hz, 2H), 6.19 (s, 1H), 5.51 (d,  $J = 14.6$  Hz, 1H), 5.25 (s, 1H), 5.06 (s, 1H), 3.98 (m, 1H), 3.76 (s, 3H), 2.08 (s, 3H).  $^{13}\text{C}$  NMR (101 MHz,  $\text{CDCl}_3$ )  $\delta$  158.9, 154.0, 143.0, 142.7, 140.2, 137.1, 130.8, 130.6, 130.2, 130.0, 130.0, 129.0, 128.7, 125.8, 122.5, 122.1, 117.8, 117.1, 113.7, 55.2, 51.5, 23.2. HRMS (ESI) calcd for  $\text{C}_{24}\text{H}_{23}^{79}\text{BrN}_2\text{NaO}_2^+$  [ $\text{M} + \text{Na}^+$ ] 473.0835, found 473.0837.

### 1-Benzyl-3-(4-fluorophenyl)-1-(2-(prop-1-en-2-yl)phenyl)urea

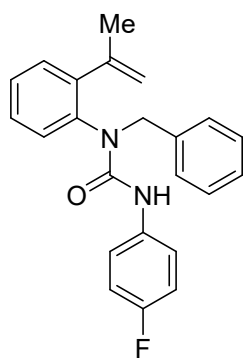

**1r** (540 mg, 67% yield, a white solid, mp: 115 - 116 °C).

$^1\text{H}$  NMR (400 MHz,  $\text{CDCl}_3$ )  $\delta$  7.38 (dd,  $J = 7.7, 1.7$  Hz, 1H), 7.33 (td,  $J = 7.5, 1.3$  Hz, 1H), 7.25 (d,  $J = 3.5$  Hz, 4H), 7.24 – 7.17 (m, 4H), 6.96 – 6.86 (m, 3H), 6.13 (s, 1H), 5.57 (d,  $J = 14.7$  Hz, 1H), 5.27 – 5.24 (m, 1H), 5.06 (s, 1H), 4.03 (d,  $J = 14.7$  Hz, 1H), 2.09 (s, 3H).  $^{13}\text{C}$  NMR (101 MHz,  $\text{CDCl}_3$ )  $\delta$  158.9, (d,  $^1J_{\text{C-F}} = 242.8$  Hz), 154.6, 143.1, 142.8, 138.0, 137.4, 134.8, (d,  $^4J_{\text{C-F}} = 2.7$  Hz), 130.8, 130.6, 128.9, 128.7, (d,  $^2J_{\text{C-F}} = 22.6$  Hz), 128.3, 127.3, 121.5, (d,  $^3J_{\text{C-F}} = 7.8$  Hz), 117.0, 115.5, 115.3, 52.1, 23.2.  $^{19}\text{F}$  NMR (376 MHz,  $\text{CDCl}_3$ )  $\delta$  -120.1. HRMS (ESI) calcd for  $\text{C}_{23}\text{H}_{21}\text{FN}_2\text{NaO}^+$  [ $\text{M} + \text{Na}^+$ ] 383.1530, found 383.1532.

### 1-Benzyl-3-(4-chlorophenyl)-1-(2-(prop-1-en-2-yl)phenyl)urea

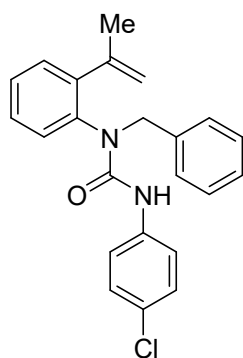

**1s** (397 mg, 47% yield, a white solid, mp: 87 - 89 °C).

$^1\text{H}$  NMR (400 MHz,  $\text{CDCl}_3$ )  $\delta$  7.44 (m, 2H), 7.31 (m, 8H), 7.26 (m, 2H), 6.94 (d,  $J = 7.8$  Hz, 1H), 6.26 (s, 1H), 5.64 (d,  $J = 14.7$  Hz, 1H), 5.32 (s, 1H), 5.12 (s, 1H), 4.10 (d,  $J = 14.7$  Hz, 1H), 2.15 (s, 3H).  $^{13}\text{C}$  NMR (101 MHz,  $\text{CDCl}_3$ )  $\delta$  154.3, 143.0, 142.7, 137.9, 137.4, 137.2, 130.8, 130.5, 129.0, 128.9, 128.8, 128.7, 128.4, 127.9, 127.4, 120.7, 117.1, 52.1, 23.2. HRMS (ESI) calcd for  $\text{C}_{23}\text{H}_{21}^{35}\text{ClN}_2\text{NaO}^+$  [ $\text{M} + \text{Na}^+$ ]

399.1235, found 399.1238.

### 3-(4-Acetylphenyl)-1-benzyl-1-(2-(prop-1-en-2-yl)phenyl)urea

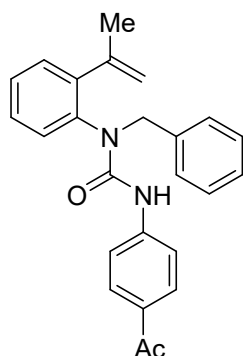

**1t** (594 mg, 69% yield, a brown solid, mp: 110 - 112 °C).

$^1\text{H}$  NMR (400 MHz,  $\text{CDCl}_3$ )  $\delta$  7.75 (d,  $J = 8.8$  Hz, 2H), 7.33 – 7.28 (m, 3H), 7.25 (td,  $J = 7.5, 1.2$  Hz, 1H), 7.19 – 7.13 (m, 5H), 7.11 (dd,  $J = 7.3, 1.8$  Hz, 1H), 6.82 – 6.75 (m, 1H), 6.39 (s, 1H), 5.49 (d,  $J = 14.7$  Hz, 1H), 5.17 – 5.13 (m, 1H), 4.96 (s, 1H), 3.96 (d,  $J = 14.7$  Hz, 1H), 2.42 (s, 3H), 1.98 (s, 3H).  $^{13}\text{C}$  NMR (101 MHz,  $\text{CDCl}_3$ )  $\delta$  196.8, 153.8, 143.4, 142.8, 142.6, 137.7, 137.0, 131.7, 130.8, 130.4, 129.7, 129.1, 128.9, 128.8, 128.4, 127.5, 118.1, 117.2, 52.3, 26.4, 23.2. HRMS (ESI) calcd for  $\text{C}_{25}\text{H}_{24}\text{N}_2\text{NaO}_2^+$  [ $\text{M} + \text{Na}^+$ ] 407.1730, found 407.1726.

### 1-Benzyl-3-(4-cyanophenyl)-1-(2-(prop-1-en-2-yl)phenyl)urea

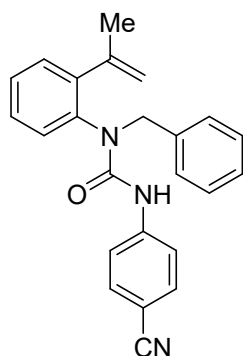

**1t** (510 mg, 62% yield, colorless liquid).

$^1\text{H}$  NMR (400 MHz,  $\text{CDCl}_3$ )  $\delta$  7.48 (d,  $J = 8.8$  Hz, 2H), 7.44 – 7.35 (m, 4H), 7.24 (m, 5H), 7.23 – 7.19 (m, 1H), 6.87 (d,  $J = 7.7$  Hz, 1H), 6.47 (s, 1H), 5.56 (d,  $J = 14.7$  Hz, 1H), 5.25 (s, 1H), 5.04 (s, 1H), 4.05 (m, 1H), 2.07 (s, 3H).  $^{13}\text{C}$  NMR (101 MHz,  $\text{CDCl}_3$ )  $\delta$  153.6, 143.1, 142.8, 142.6, 137.5, 136.8, 133.1, 130.9, 130.3, 129.2, 128.9, 128.8, 128.5, 127.6, 119.1, 118.8, 117.2, 105.5, 52.4, 23.2. HRMS (ESI) calcd for

$C_{24}H_{21}N_3NaO_2^+$  [ $M + Na^+$ ] 390.1577, found 390.1573.

### 1-Benzyl-3-(4-nitrophenyl)-1-(2-(prop-1-en-2-yl)phenyl)urea

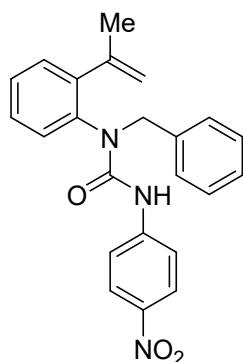

**1v** (625 mg, 72% yield, colorless liquid).

$^1H$  NMR (400 MHz,  $CDCl_3$ )  $\delta$  8.15 (d,  $J = 9.2$  Hz, 2H), 7.51 (d,  $J = 9.2$  Hz, 2H), 7.47 – 7.43 (m, 1H), 7.43 – 7.39 (m, 1H), 7.34 – 7.25 (m, 6H), 6.93 (d,  $J = 7.7$  Hz, 1H), 6.64 (s, 1H), 5.62 (d,  $J = 14.7$  Hz, 1H), 5.31 (s, 1H), 5.09 (s, 1H), 4.11 (m, 1H), 2.12 (s, 3H).

$^{13}C$  NMR (101 MHz,  $CDCl_3$ )  $\delta$  153.5, 145.0, 142.7, 142.6, 142.5, 137.4, 136.7, 131.0, 130.2, 129.3, 128.9, 128.9, 128.5, 127.6, 125.0, 118.1, 117.3, 52.4, 23.2. HRMS (ESI) calcd for  $C_{23}H_{21}N_3NaO_3^+$  [ $M + Na^+$ ] 410.1475, found 410.1471.

### 1-Benzyl-1-(2-(prop-1-en-2-yl)phenyl)-3-(*p*-tolyl)urea

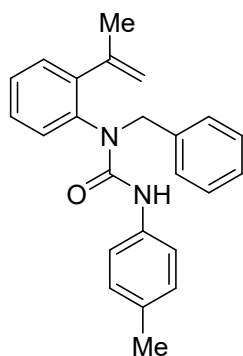

**1w** (559 mg, 70% yield, colorless liquid).

$^1H$  NMR (400 MHz,  $CDCl_3$ )  $\delta$  7.36 (dd,  $J = 7.7, 1.6$  Hz, 1H), 7.30 (td,  $J = 7.5, 1.2$  Hz, 1H), 7.26 – 7.20 (m, 5H), 7.19 – 7.14 (m, 3H), 7.02 (d,  $J = 8.3$  Hz, 2H), 6.87 (dd,  $J = 7.8, 0.9$  Hz, 1H), 6.12 (s, 1H), 5.58 (d,  $J = 14.7$  Hz, 1H), 5.25 – 5.22 (m, 1H), 5.06 (s, 1H), 4.03 (d,  $J = 14.7$  Hz, 1H), 2.25 (s, 3H), 2.08 (s, 3H).  $^{13}C$  NMR (101 MHz,  $CDCl_3$ )  $\delta$  154.6, 143.2, 142.8, 138.3, 137.5, 136.3, 132.6, 130.7, 130.7, 129.4, 128.9, 128.8, 128.6, 128.3, 127.3, 119.7, 117.0, 52.0, 23.2, 20.8. HRMS (ESI) calcd for

$C_{24}H_{24}N_2NaO^+$  [ $M + Na^+$ ] 379.1781, found 379.1778.

**1-Benzyl-3-(4-methoxyphenyl)-1-(2-(prop-1-en-2-yl)phenyl)urea**

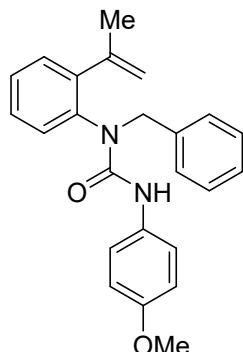

**1x** (609 mg, 73% yield, colorless liquid).

$^1H$  NMR (400 MHz,  $CDCl_3$ )  $\delta$  7.28 (dd,  $J = 7.7, 1.4$  Hz, 1H), 7.24 – 7.19 (m, 1H), 7.17 – 7.05 (m, 9H), 6.79 (d,  $J = 7.8$  Hz, 1H), 6.69 (d,  $J = 9.0$  Hz, 2H), 5.97 (s, 1H), 5.49 (d,  $J = 14.6$  Hz, 1H), 5.16 (s, 1H), 4.98 (s, 1H), 3.94 (m, 1H), 3.63 (s, 3H), 2.01 (s, 3H).

$^{13}C$  NMR (101 MHz,  $CDCl_3$ )  $\delta$  155.8, 154.9, 143.2, 142.8, 138.3, 137.6, 131.9, 130.7, 130.7, 128.9, 128.7, 128.6, 128.3, 127.3, 121.8, 117.0, 114.1, 55.5, 52.0, 23.2. HRMS (ESI) calcd for  $C_{24}H_{24}N_2NaO_2^+$  [ $M + Na^+$ ] 395.1730, found 395.1733.

**1-Benzyl-1-(2-(prop-1-en-2-yl)phenyl)-3-(*o*-tolyl)urea**

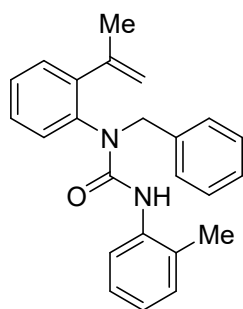

**1y** (493 mg, 58% yield, colorless liquid).

$^1H$  NMR (400 MHz,  $CDCl_3$ )  $\delta$  8.00 (d,  $J = 8.1$  Hz, 1H), 7.44 (dd,  $J = 7.7, 1.6$  Hz, 1H), 7.37 (td,  $J = 7.5, 1.2$  Hz, 1H), 7.32 – 7.26 (m, 5H), 7.23 (t,  $J = 6.5$  Hz, 2H), 7.09 (d,  $J = 7.1$  Hz, 1H), 7.01 – 6.92 (m, 2H), 6.15 (s, 1H), 5.66 (d,  $J = 14.7$  Hz, 1H), 5.32 (m, 1H), 5.15 (s, 1H), 4.09 (d,  $J = 14.7$  Hz, 1H), 2.18 (s, 3H), 1.87 (s, 3H).  $^{13}C$  NMR (101 MHz,  $CDCl_3$ )  $\delta$  154.5, 143.1, 142.9, 138.2, 137.4, 137.1, 130.8, 130.8, 130.1, 129.0, 128.9, 128.5, 128.3, 127.3, 127.0, 126.9, 123.3, 121.0, 117.0, 51.7, 23.3, 17.3. HRMS

(ESI) calcd for  $C_{24}H_{24}N_2NaO^+$  [ $M + Na^+$ ] 379.1781, found 379.1784.

#### General procedure for preparation of substrates 1c - 1f. [4]

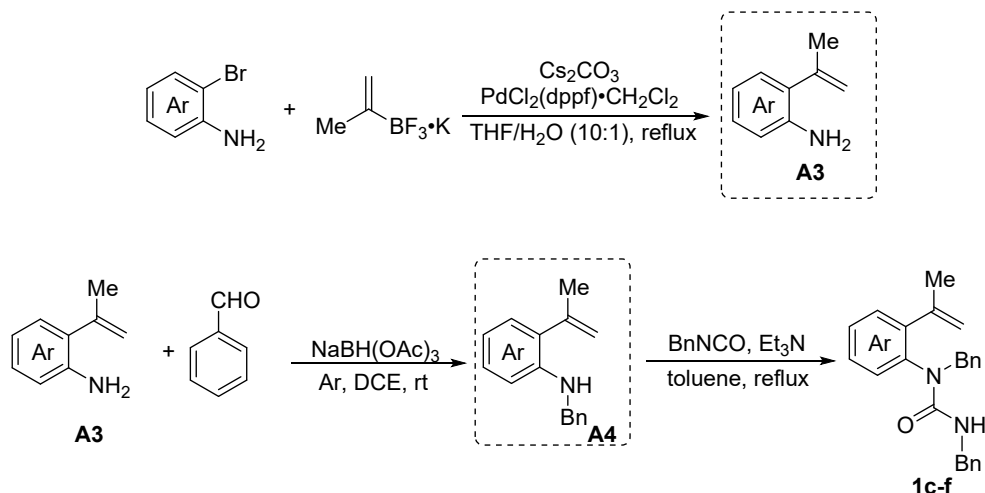

#### Method B:

**A3:** To a suspension of potassium isopropenyltrifluoroborate (1.1 equiv), Cs<sub>2</sub>CO<sub>3</sub> (3.0 equiv), PdCl<sub>2</sub>(dppf)·CH<sub>2</sub>Cl<sub>2</sub> (9.0 mol%) in a solvent mixture (THF/H<sub>2</sub>O = 10/1) was added 2-bromoaniline (1.0 equiv). The reaction mixture was stirred at reflux for 16 h, then cooled to room temperature and diluted with water (30 mL) followed by extraction with EtOAc (50 mL × 3). The combined organic layers were washed with brine (50 mL) and dried over anhydrous Na<sub>2</sub>SO<sub>4</sub>. After filtered, the mixture was concentrated under vacuum. The residue was purified by flash column chromatography on silica gel (EtOAc/PE = 1/15) gave the compound **A3**.

**1c-f:** The following preparation procedure from **A3** to **1c-f** is similar to that of method A.

#### 1,3-Dibenzyl-1-(3-methyl-2-(prop-1-en-2-yl)phenyl)urea

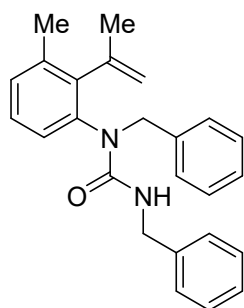

**1c** (569 mg, 73% yield, a white solid, mp: 97 – 99 °C).

$^1\text{H}$  NMR (400 MHz,  $\text{CDCl}_3$ )  $\delta$  7.19 – 7.05 (m, 11H), 7.01 (d,  $J = 7.6$  Hz, 1H), 6.86 (t,  $J = 7.7$  Hz, 1H), 6.48 (d,  $J = 7.0$  Hz, 1H), 5.49 (d,  $J = 14.7$  Hz, 1H), 5.20 (s, 1H), 4.71 (s, 1H), 4.33 (m, 3H), 3.88 (d,  $J = 14.7$  Hz, 1H), 2.16 (s, 3H), 1.84 (s, 3H).  $^{13}\text{C}$  NMR (101 MHz,  $\text{CDCl}_3$ )  $\delta$  157.4, 143.2, 139.7, 138.9, 138.0, 137.8, 130.4, 129.0, 128.5, 128.3, 127.6, 127.6, 127.1, 116.5, 52.9, 44.9, 23.5, 20.0. HRMS (ESI) calcd for  $\text{C}_{25}\text{H}_{26}\text{N}_2\text{NaO}^+$  [ $\text{M} + \text{Na}^+$ ] 393.1937, found 393.1934.

### 1,3-Dibenzyl-1-(4-(*tert*-butyl)-2-(prop-1-en-2-yl)phenyl)urea

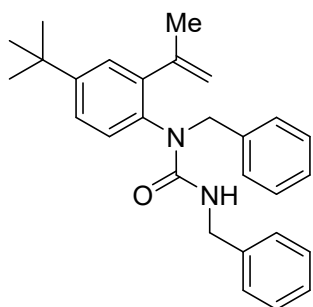

**1d** (509 mg, 69% yield, a white solid, mp: 77 – 79 °C).

$^1\text{H}$  NMR (400 MHz,  $\text{CDCl}_3$ )  $\delta$  7.22 – 7.09 (m, 12H), 7.03 (dd,  $J = 8.3, 2.4$  Hz, 1H), 6.67 (d,  $J = 8.3$  Hz, 1H), 5.44 (d,  $J = 14.8$  Hz, 1H), 5.13 – 5.06 (m, 1H), 4.96 – 4.88 (m, 1H), 4.58 (t,  $J = 5.8$  Hz, 1H), 4.34 (p,  $J = 9.0$  Hz, 2H), 3.90 (d,  $J = 14.8$  Hz, 1H), 1.96 (s, 3H), 1.19 (s, 9H).  $^{13}\text{C}$  NMR (101 MHz,  $\text{CDCl}_3$ )  $\delta$  157.4, 151.3, 144.0, 141.8, 139.8, 138.8, 135.0, 130.1, 128.7, 128.5, 128.2, 127.5, 127.4, 127.1, 127.0, 125.4, 116.4, 52.2, 44.8, 34.6, 31.3, 23.3. HRMS (ESI) calcd for  $\text{C}_{28}\text{H}_{32}\text{N}_2\text{NaO}^+$  [ $\text{M} + \text{Na}^+$ ] 435.2407, found 435.2403.

### 1,3-Dibenzyl-1-(4-bromo-2-(prop-1-en-2-yl)phenyl)urea

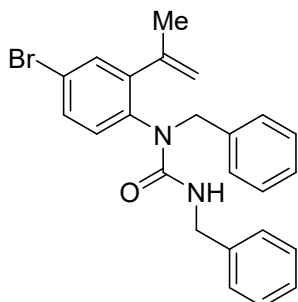

**1e** (540 mg, 75% yield, a white solid, mp: 104 – 106 °C).

$^1\text{H}$  NMR (400 MHz,  $\text{CDCl}_3$ )  $\delta$  7.51 (d,  $J = 2.2$  Hz, 1H), 7.33 (m, 10H), 6.71 (d,  $J = 8.4$



Hz, 1H), 5.62 (d,  $J = 14.2$  Hz, 1H), 5.30 (s, 1H), 5.10 (s, 1H), 4.61 (t,  $J = 5.3$  Hz, 1H), 4.48 (dd,  $J = 9.7, 5.5$  Hz, 2H), 4.01 (d,  $J = 14.3$  Hz, 1H), 2.09 (s, 3H).  $^{13}\text{C}$  NMR (101 MHz,  $\text{CDCl}_3$ )  $\delta$  156.8, 144.6, 142.2, 139.3, 138.1, 136.7, 133.4, 132.5, 131.4, 128.8, 128.6, 128.4, 127.6, 127.3, 127.3, 122.1, 117.7, 51.8, 45.0, 22.8. HRMS (ESI) calcd for  $\text{C}_{24}\text{H}_{23}^{79}\text{BrN}_2\text{NaO}^+$  [ $\text{M} + \text{Na}^+$ ] 457.0886, found 457.0889.

### 1,3-Dibenzyl-1-(3-(prop-1-en-2-yl)-[1,1'-biphenyl]-4-yl)urea

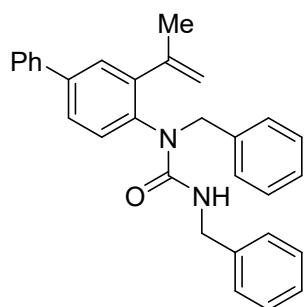

**1f** (491 mg, 68% yield, colorless liquid).

$^1\text{H}$  NMR (400 MHz,  $\text{CDCl}_3$ )  $\delta$  7.48 – 7.41 (m, 3H), 7.33 (t,  $J = 7.5$  Hz, 2H), 7.28 – 7.22 (m, 2H), 7.16 (m, 11H), 6.78 (d,  $J = 8.1$  Hz, 1H), 5.50 (d,  $J = 14.5$  Hz, 1H), 5.15 (s, 1H), 4.99 (s, 1H), 4.59 (t,  $J = 5.5$  Hz, 1H), 4.36 (t,  $J = 4.8$  Hz, 2H), 3.95 (d,  $J = 14.6$  Hz, 1H), 2.00 (s, 3H).  $^{13}\text{C}$  NMR (101 MHz,  $\text{CDCl}_3$ )  $\delta$  157.2, 143.5, 142.9, 141.1, 139.8, 139.6, 138.5, 136.8, 131.2, 129.2, 128.9, 128.9, 128.5, 128.3, 127.8, 127.6, 127.2, 127.0, 126.9, 116.9, 52.1, 44.9, 23.1. HRMS (ESI) calcd for  $\text{C}_{30}\text{H}_{28}\text{N}_2\text{NaO}^+$  [ $\text{M} + \text{Na}^+$ ] 455.2094, found 455.2091.

### 1,3-dibenzyl-1-(2-(1-phenylvinyl)phenyl)urea

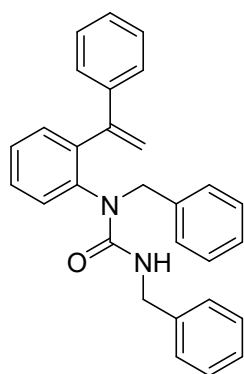

**1ab** (447.3 mg, 61% yield, a white solid, mp: 99 – 101 °C).

$^1\text{H}$  NMR (400 MHz,  $\text{CDCl}_3$ )  $\delta$  7.38 (d,  $J = 7.6$  Hz, 1H), 7.31 – 7.17 (m, 13H), 7.15 (d,  $J = 7.5$  Hz, 4H), 6.82 (d,  $J = 7.8$  Hz, 1H), 5.62 (s, 1H), 5.24 (s, 1H), 5.19 (d,  $J = 14.8$  Hz, 1H), 4.32 (m, 2H), 4.09 (m, 1H), 3.65 (d,  $J = 14.6$  Hz, 1H).  $^{13}\text{C}$  NMR (101 MHz,  $\text{CDCl}_3$ )  $\delta$  156.7, 147.5, 141.4, 140.9, 139.5, 138.8, 138.8, 132.1, 131.2, 129.0, 128.8, 128.7, 128.5, 128.4, 128.2, 128.0, 127.6, 127.1, 127.1, 126.7, 117.0, 51.4, 44.8. HRMS (ESI) calcd for  $\text{C}_{29}\text{H}_{26}\text{N}_2\text{NaO}^+$  [ $\text{M} + \text{Na}^+$ ] 441.1937, found 441.1935.

### 1,3-dibenzyl-1-(2-vinylphenyl)urea

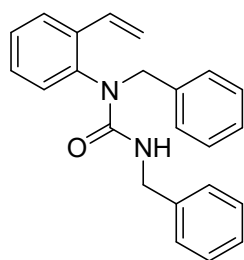

**1ac** (303 mg, 37% yield, colorless liquid).

$^1\text{H}$  NMR (600 MHz,  $\text{CDCl}_3$ )  $\delta$  7.60 (d,  $J = 7.6$  Hz, 1H), 7.35 – 7.21 (m, 8H), 7.19 (m, 4H), 6.87 (d,  $J = 7.7$  Hz, 1H), 6.69 (dd,  $J = 17.5, 11.1$  Hz, 1H), 5.71 (d,  $J = 17.6$  Hz, 1H), 5.29 (t,  $J = 10.3$  Hz, 2H), 4.46 – 4.28 (m, 4H).  $^{13}\text{C}$  NMR (151 MHz,  $\text{CDCl}_3$ )  $\delta$  157.1, 139.5, 138.3, 138.2, 136.5, 131.7, 130.3, 129.1, 129.1, 128.6, 128.4, 128.3, 127.3, 127.2, 127.0, 126.7, 116.7, 52.9, 44.7. HRMS (ESI) calcd for  $\text{C}_{23}\text{H}_{22}\text{N}_2\text{NaO}^+$  [ $\text{M} + \text{Na}^+$ ] 365.1624, found 365.1620.

### General procedure for preparation of substrates 1ad.<sup>[5]</sup>

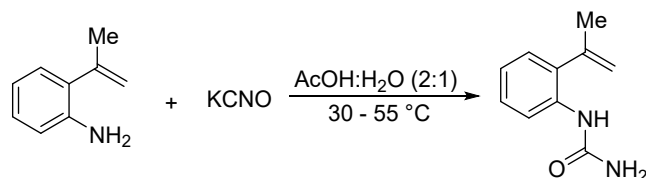

To a solution of 2-alkenyl aniline (500 mg, 1.0 equiv) in a solvent mixture ( $\text{AcOH}/\text{H}_2\text{O} = 2/1$ ) was added warm  $\text{KCNO}$  solution (10 equiv of  $\text{KCNO}$  dissolved in 15 mL water) slowly at 30 °C. Then reaction mixture was heated to 55 °C and stirred at that temperature for 30 mins. The product was filtered under reduced pressure. The residue was washed with water and dried by lyophilization to obtain the corresponding

compound **1ad** as a white powder.

### 1-(2-(Prop-1-en-2-yl)phenyl)urea

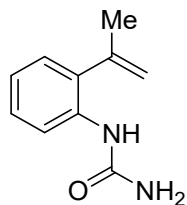

**1ad** (423 mg, 64% yield, a white solid, mp: 168 – 169 °C).

$^1\text{H}$  NMR (400 MHz, DMSO- $d_6$ )  $\delta$  7.87 (d,  $J$  = 8.1 Hz, 1H), 7.48 (s, 1H), 7.15 (t,  $J$  = 7.3 Hz, 1H), 7.06 (d,  $J$  = 7.4 Hz, 1H), 6.93 (t,  $J$  = 7.3 Hz, 1H), 6.13 (s, 2H), 5.28 (s, 1H), 4.95 (s, 1H), 2.00 (s, 3H).  $^{13}\text{C}$  NMR (101 MHz, DMSO- $d_6$ )  $\delta$  156.5, 143.3, 136.6, 134.0, 128.4, 127.6, 122.3, 121.7, 117.1, 24.1. HRMS (ESI) calcd for  $\text{C}_{10}\text{H}_{12}\text{N}_2\text{NaO}^+$  [ $\text{M} + \text{Na}^+$ ] 199.0842, found 199.0838.

## 2. Typical Synthetic Procedure and Spectroscopic Data of 2a-y.

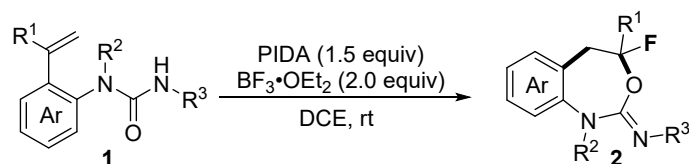

To a reaction flask filled with PIDA (1.5 equiv, 0.75 mmol) in DCE (5.0 mL) was added  $\text{BF}_3 \cdot \text{OEt}_2$  (2.0 equiv, 1 mmol). The mixture was stirred at room temperature for 1 min and reactant **1** (0.5 mmol) was added. The resulting mixture was kept stirring until TLC indicated the total consumption of substrate **1**. Then the reaction mixture was quenched with aqueous saturated  $\text{NaHCO}_3$  (5 mL), and extracted with EtOAc (10 mL x 3). The combined organic layers were washed with brine and dried over anhydrous  $\text{Na}_2\text{SO}_4$ . After filtered, the mixture was concentrated under vacuum. The residue was purified by flash column chromatography on silica gel (PE/EtOAc = 30/1~ 10/1) to afford target product **2**.

**(Z)-N,1-Dibenzyl-4-fluoro-4-methyl-4,5-dihydrobenzo[*d*][1,3]oxazepin-2(1H)-imine**

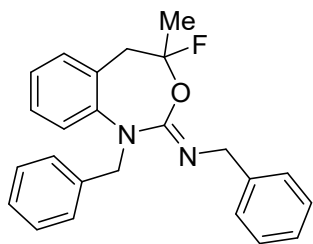

**2a** (154 mg, 82% yield, a pale yellow solid, mp: 88 - 90 °C).

$^1\text{H}$  NMR (400 MHz, Chloroform-*d*)  $\delta$  7.32 – 7.16 (m, 8H), 7.12 (dd,  $J = 12.4, 5.1$  Hz, 5H), 7.02 (t,  $J = 7.3$  Hz, 1H), 5.35 (d,  $J = 16.0$  Hz, 1H), 5.05 (d,  $J = 16.0$  Hz, 1H), 4.74 (d,  $J = 15.9$  Hz, 1H), 4.54 (d,  $J = 15.9$  Hz, 1H), 3.39 (t,  $J = 13.6$  Hz, 1H), 2.89 (d,  $J = 14.0$  Hz, 1H), 1.53 (d,  $J = 17.8$  Hz, 3H).  $^{13}\text{C}$  NMR (101 MHz,  $\text{CDCl}_3$ )  $\delta$  146.1, 143.2, 142.0, 138.6, 131.0, 129.4, 128.7, (d,  $^3J_{\text{C-F}} = 7.0$  Hz), 128.5, 128.0, 127.3, 127.1, 126.9, 125.9, 124.1, 121.2, 119.9, (d,  $^1J_{\text{C-F}} = 231.7$  Hz), 54.1, 50.7, 41.5, (d,  $^2J_{\text{C-F}} = 32.6$  Hz), 23.2, (d,  $^2J_{\text{C-F}} = 28.0$  Hz).  $^{19}\text{F}$  NMR (376 MHz,  $\text{CDCl}_3$ )  $\delta$  -84.8. HRMS (ESI) calcd for  $\text{C}_{24}\text{H}_{23}\text{FN}_2\text{NaO}^+$  [ $\text{M} + \text{Na}^+$ ] 397.1687, found 397.1689.

**(Z)-N,1-Dibenzyl-4-ethyl-4-fluoro-4,5-dihydrobenzo[d][1,3]oxazepin-2(1H)-imine**

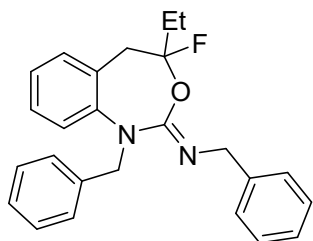

**2b** (155 mg, 80% yield, a white solid, mp: 56 – 57 °C).  $^1\text{H}$  NMR (400 MHz,  $\text{CDCl}_3$ )  $\delta$  7.29 (q,  $J = 7.9$  Hz, 4H), 7.25 – 7.20 (m, 2H), 7.18 (d,  $J = 7.2$  Hz, 2H), 7.11 (dd,  $J = 14.0, 6.8$  Hz, 5H), 7.01 (t,  $J = 7.3$  Hz, 1H), 5.37 (d,  $J = 16.0$  Hz, 1H), 5.04 (d,  $J = 16.0$  Hz, 1H), 4.74 (d,  $J = 15.8$  Hz, 1H), 4.53 (d,  $J = 15.8$  Hz, 1H), 3.35 (t,  $J = 14.0$  Hz, 1H), 2.95 (d,  $J = 14.1$  Hz, 1H), 1.93 – 1.66 (m, 2H), 1.05 (t,  $J = 7.5$  Hz, 3H).  $^{13}\text{C}$  NMR (101 MHz,  $\text{CDCl}_3$ )  $\delta$  146.2, 143.3, 142.0, 138.6, 129.3, 128.7, (d,  $^3J_{\text{C-F}} = 9.1$  Hz), 128.6, 128.5, 128.0, 127.3, 127.1, 126.9, 125.9, 123.9, 122.2, (d,  $^1J_{\text{C-F}} = 234.9$  Hz), 121.1, 54.1, 50.7, 39.8, (d,  $^2J_{\text{C-F}} = 33.0$  Hz), 29.2, (d,  $^2J_{\text{C-F}} = 26.2$  Hz), 6.8, (d,  $^3J_{\text{C-F}} = 3.0$  Hz).  $^{19}\text{F}$  NMR (376 MHz,  $\text{CDCl}_3$ )  $\delta$  -97.0. HRMS (ESI) calcd for  $\text{C}_{25}\text{H}_{25}\text{FN}_2\text{NaO}^+$  [ $\text{M} + \text{Na}^+$ ] 411.1843, found 411.1845.

**(Z)-N,1-Dibenzyl-4-fluoro-4,6-dimethyl-4,5-dihydrobenzo[d][1,3]oxazepin-2(1H)-imine**

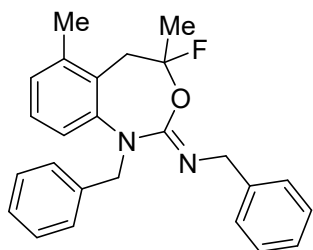

**2c** (161 mg, 84% yield, a white solid, mp: 91 - 92 °C).

<sup>1</sup>H NMR (400 MHz, CDCl<sub>3</sub>) δ 7.20 (m, 4H), 7.17 – 7.09 (m, 3H), 7.04 (m, 4H), 6.92 (d, *J* = 8.0 Hz, 1H), 6.85 (d, *J* = 7.4 Hz, 1H), 5.22 (d, *J* = 15.9 Hz, 1H), 4.98 (d, *J* = 16.0 Hz, 1H), 4.65 (d, *J* = 15.9 Hz, 1H), 4.46 (d, *J* = 15.9 Hz, 1H), 3.12 (m, 2H), 2.27 (s, 3H), 1.46 (d, *J* = 17.7 Hz, 3H). <sup>13</sup>C NMR (101 MHz, CDCl<sub>3</sub>) δ 146.1, 143.6, 142.1, 138.7, 135.9, 128.4, 127.9, 127.8, 127.8, (d, <sup>3</sup>*J*<sub>C-F</sub> = 9.3 Hz), 127.3, 127.2, 126.9, 126.1, 125.9, 119.9, (d, <sup>1</sup>*J*<sub>C-F</sub> = 231.7 Hz), 119.4, 54.3, 50.6, 36.3, (d, <sup>2</sup>*J*<sub>C-F</sub> = 32.5 Hz), 23.2, (d, <sup>2</sup>*J*<sub>C-F</sub> = 28.2 Hz), 20.2. <sup>19</sup>F NMR (376 MHz, CDCl<sub>3</sub>) δ -84.5. HRMS (ESI) calcd for C<sub>25</sub>H<sub>25</sub>FN<sub>2</sub>NaO<sup>+</sup> [*M* + Na<sup>+</sup>] 411.1843, found 411.1840.

**(Z)-N,1-Dibenzyl-7-(tert-butyl)-4-fluoro-4-methyl-4,5-dihydrobenzo[d][1,3]oxazepin-2(1H)-imine**

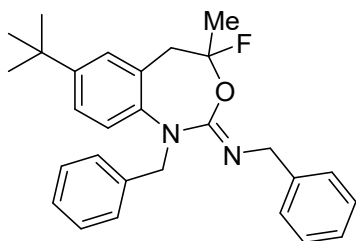

**2d** (168 mg, 81% yield, a white solid, mp: 84 - 86 °C).

<sup>1</sup>H NMR (400 MHz, CDCl<sub>3</sub>) δ 7.09 (m, 13H), 5.32 (m, 1H), 4.86 (m, 1H), 4.55 (m, 2H), 3.34 (s, 1H), 2.81 (d, *J* = 12.4 Hz, 1H), 1.46 (d, *J* = 17.0 Hz, 3H), 1.21 (s, 9H). <sup>13</sup>C NMR (101 MHz, CDCl<sub>3</sub>) δ 147.1, 146.2, 142.1, 140.8, 138.9, 128.5, 128.0, (d, <sup>3</sup>*J*<sub>C-F</sub> = 9.3 Hz), 127.9, 127.3, 127.0, 126.8, 126.3, 125.8, 125.5, 120.5, 119.9, (d, <sup>1</sup>*J*<sub>C-F</sub> = 231.2 Hz), 54.1, 50.7, 41.8, (d, <sup>2</sup>*J*<sub>C-F</sub> = 32.4 Hz), 34.3, 31.4, 23.3, (d, <sup>2</sup>*J*<sub>C-F</sub> = 28.0 Hz). <sup>19</sup>F NMR (376 MHz, CDCl<sub>3</sub>) δ -84.9. HRMS (ESI) calcd for C<sub>28</sub>H<sub>31</sub>FN<sub>2</sub>NaO<sup>+</sup> [*M* + Na<sup>+</sup>] 453.2313, found 453.2317.

**(Z)-N,1-Dibenzyl-7-bromo-4-fluoro-4-methyl-4,5-dihydrobenzo[d][1,3]oxazepin-2(1H)-imine**

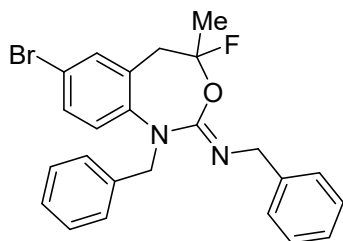

**2e** (188 mg, 83% yield, a white solid, mp: 112 - 113 °C).

$^1\text{H}$  NMR (400 MHz,  $\text{CDCl}_3$ )  $\delta$  7.39 – 7.27 (m, 7H), 7.22 (m, 5H), 7.01 (d,  $J = 8.5$  Hz, 1H), 5.33 (d,  $J = 15.9$  Hz, 1H), 5.08 (d,  $J = 15.9$  Hz, 1H), 4.76 (d,  $J = 15.7$  Hz, 1H), 4.57 (d,  $J = 15.7$  Hz, 1H), 3.39 (t,  $J = 13.5$  Hz, 1H), 2.88 (d,  $J = 13.9$  Hz, 1H), 1.59 (d,  $J = 17.8$  Hz, 3H).  $^{13}\text{C}$  NMR (101 MHz,  $\text{CDCl}_3$ )  $\delta$  145.6, 142.3, 141.7, 138.1, 132.0, 131.6, 130.7, (d,  $^3J_{\text{C-F}} = 9.2$  Hz), 128.6, 128.0, 127.3, 127.1, 127.1, 126.0, 122.7, 120.5, (d,  $^1J_{\text{C-F}} = 232.2$  Hz), 116.5, 54.0, 50.7, 41.2, (d,  $^2J_{\text{C-F}} = 33.5$  Hz), 23.3, (d,  $^2J_{\text{C-F}} = 27.9$  Hz).  $^{19}\text{F}$  NMR (376 MHz,  $\text{CDCl}_3$ )  $\delta$  -85.1. HRMS (ESI) calcd for  $\text{C}_{24}\text{H}_{22}^{79}\text{BrFN}_2\text{NaO}^+$  [ $\text{M} + \text{Na}^+$ ] 475.0792, found 475.0795.

**(Z)-N,1-Dibenzyl-4-fluoro-4-methyl-7-phenyl-4,5-dihydrobenzo[d][1,3]oxazepin-2(1H)-imine**

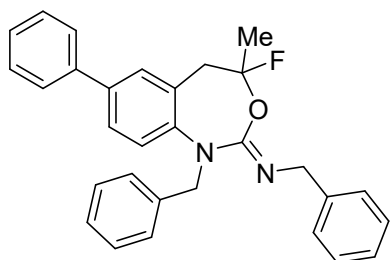

**2f** (171 mg, 76% yield, a white solid, mp: 107 - 108 °C).

$^1\text{H}$  NMR (400 MHz,  $\text{CDCl}_3$ )  $\delta$  7.52 – 7.41 (m, 3H), 7.22 (m, 16H), 5.31 (d,  $J = 15.8$  Hz, 1H), 4.98 (d,  $J = 15.3$  Hz, 1H), 4.68 (d,  $J = 15.7$  Hz, 1H), 4.48 (d,  $J = 15.7$  Hz, 1H), 3.38 (t,  $J = 13.0$  Hz, 1H), 2.88 (d,  $J = 13.5$  Hz, 1H), 1.50 (d,  $J = 17.6$  Hz, 3H).  $^{13}\text{C}$  NMR (101 MHz,  $\text{CDCl}_3$ )  $\delta$  146.0, 142.5, 141.9, 140.1, 138.6, 136.9, 129.0, 128.9, 128.5, 128.0, 127.4, 127.3, 127.1, 127.0, 126.9, 125.9, 121.4, 119.8, (d,  $^1J_{\text{C-F}} = 232.0$  Hz), 54.1, 50.8, 41.7, (d,  $^2J_{\text{C-F}} = 32.7$  Hz), 23.4, (d,  $^2J_{\text{C-F}} = 27.9$  Hz).  $^{19}\text{F}$  NMR (376 MHz,

CDCl<sub>3</sub>)  $\delta$  -84.8. HRMS (ESI) calcd for C<sub>30</sub>H<sub>27</sub>FN<sub>2</sub>NaO<sup>+</sup> [M + Na<sup>+</sup>] 473.2000, found 473.2003.

**(Z)-N-Benzyl-1-ethyl-4-fluoro-4-methyl-4,5-dihydrobenzo[d][1,3]oxazepin-2(1H)-imine**

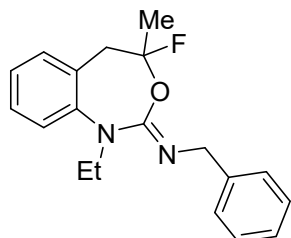

**2g** (114 mg, 73% yield, colorless liquid).

<sup>1</sup>H NMR (400 MHz, CDCl<sub>3</sub>)  $\delta$  7.31 (d,  $J$  = 7.4 Hz, 2H), 7.26 – 7.18 (m, 3H), 7.15 – 7.07 (m, 2H), 7.05 (d,  $J$  = 7.2 Hz, 1H), 6.97 (t,  $J$  = 7.3 Hz, 1H), 4.67 (d,  $J$  = 15.7 Hz, 1H), 4.50 (d,  $J$  = 15.7 Hz, 1H), 3.99 (dq,  $J$  = 14.0, 7.0 Hz, 1H), 3.89 (dq,  $J$  = 13.9, 6.9 Hz, 1H), 3.32 (t,  $J$  = 13.6 Hz, 1H), 2.81 (d,  $J$  = 13.9 Hz, 1H), 1.42 (d,  $J$  = 17.7 Hz, 3H), 1.21 (t,  $J$  = 7.0 Hz, 3H). <sup>13</sup>C NMR (101 MHz, CDCl<sub>3</sub>)  $\delta$  145.7, 142.9, 142.3, 129.3, (d, <sup>3</sup> $J_{C-F}$  = 9.2 Hz), 129.3, 128.6, 128.1, 127.4, 126.0, 124.0, 121.5, 119.7, (d, <sup>1</sup> $J_{C-F}$  = 231.0 Hz), 50.9, 45.6, 41.3, (d, <sup>2</sup> $J_{C-F}$  = 32.7 Hz), 23.3, (d, <sup>2</sup> $J_{C-F}$  = 23.3 Hz), 13.3. <sup>19</sup>F NMR (376 MHz, CDCl<sub>3</sub>)  $\delta$  -85.0. HRMS (ESI) calcd for C<sub>19</sub>H<sub>21</sub>FN<sub>2</sub>NaO<sup>+</sup> [M + Na<sup>+</sup>] 335.1530, found 335.1534.

**(Z)-N-Benzyl-4-fluoro-1-isopropyl-4-methyl-4,5-dihydrobenzo[d][1,3]oxazepin-2(1H)-imine**

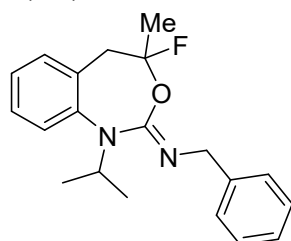

**2h** (135 mg, 83% yield, colorless liquid).

<sup>1</sup>H NMR (400 MHz, CDCl<sub>3</sub>)  $\delta$  7.39 (d,  $J$  = 7.3 Hz, 2H), 7.29 (m, 3H), 7.21 (dd,  $J$  = 9.2, 5.6 Hz, 2H), 7.15 (d,  $J$  = 7.3 Hz, 1H), 7.09 (t,  $J$  = 7.2 Hz, 1H), 4.76 (dd,  $J$  = 14.6, 8.7 Hz, 2H), 4.57 (d,  $J$  = 15.8 Hz, 1H), 3.39 (t,  $J$  = 13.9 Hz, 1H), 2.87 (d,  $J$  = 13.7 Hz, 1H), 1.56 (d,  $J$  = 6.5 Hz, 3H), 1.45 (d,  $J$  = 17.8 Hz, 3H), 1.19 (d,  $J$  = 7.0 Hz, 3H). <sup>13</sup>C NMR

(101 MHz, CDCl<sub>3</sub>)  $\delta$  145.3, 142.6, 141.4, 131.3, (d,  $^3J_{C-F}$  = 8.8 Hz), 128.9, 128.1, 127.9, 127.4, 125.9, 124.9, 124.1, 119.1, (d,  $^1J_{C-F}$  = 230.4 Hz), 51.5, 50.7, 41.2, (d,  $^2J_{C-F}$  = 32.9 Hz), 23.4, (d,  $^2J_{C-F}$  = 27.8 Hz), 22.2, 20.3.  $^{19}\text{F}$  NMR (376 MHz, CDCl<sub>3</sub>)  $\delta$  -86.2. HRMS (ESI) calcd for C<sub>20</sub>H<sub>23</sub>FN<sub>2</sub>NaO<sup>+</sup> [M + Na<sup>+</sup>] 349.1687, found 349.1684.

**(Z)-N-Benzyl-1-butyl-4-fluoro-4-methyl-4,5-dihydrobenzo[d][1,3]oxazepin-2(1H)-imine**

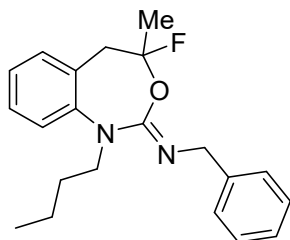

**2i** (140 mg, 82% yield, colorless liquid).

$^1\text{H}$  NMR (400 MHz, CDCl<sub>3</sub>)  $\delta$  7.42 – 7.24 (m, 5H), 7.21 – 7.08 (m, 3H), 7.04 (m, 1H), 4.77 – 4.52 (m, 2H), 4.11 (m, 1H), 3.87 – 3.77 (m, 1H), 3.39 (t,  $J$  = 13.6 Hz, 1H), 2.87 (d,  $J$  = 13.8 Hz, 1H), 1.75 – 1.63 (m, 2H), 1.48 (d,  $J$  = 17.7 Hz, 3H), 1.30 (m, 2H), 0.95 – 0.81 (m, 3H).  $^{13}\text{C}$  NMR (101 MHz, CDCl<sub>3</sub>)  $\delta$  145.9, 143.0, 142.4, 129.4, (d,  $^3J_{C-F}$  = 8.8 Hz), 129.3, 128.6, 128.1, 127.4, 126.0, 123.9, 121.6, 119.5, (d,  $^1J_{C-F}$  = 231.2 Hz), 50.8, 50.3, 41.4, (d,  $^2J_{C-F}$  = 32.9 Hz), 29.9, 23.3, (d,  $^2J_{C-F}$  = 28.1 Hz), 20.4, 14.0.  $^{19}\text{F}$  NMR (376 MHz, CDCl<sub>3</sub>)  $\delta$  -85.0. HRMS (ESI) calcd for C<sub>21</sub>H<sub>25</sub>FN<sub>2</sub>NaO<sup>+</sup> [M + Na<sup>+</sup>] 363.1843, found 363.1845.

**(Z)-N-Benzyl-4-fluoro-1-isobutyl-4-methyl-4,5-dihydrobenzo[d][1,3]oxazepin-2(1H)-imine**

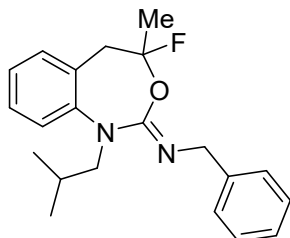

**2j** (131 mg, 77% yield, colorless liquid).

$^1\text{H}$  NMR (400 MHz, CDCl<sub>3</sub>)  $\delta$  7.42 (d,  $J$  = 7.0 Hz, 2H), 7.33 (q,  $J$  = 8.0, 7.3 Hz, 3H), 7.25 – 7.15 (m, 3H), 7.08 (t,  $J$  = 7.3 Hz, 1H), 4.76 – 4.60 (m, 2H), 4.22 (m, 1H), 3.62 (m, 1H), 3.51 (m, 1H), 2.96 (m,  $J$  = 13.8 Hz, 1H), 2.18 (m, 1H), 1.54 (d,  $J$  = 17.6 Hz,



3H), 0.96 (d,  $J = 6.5$  Hz, 3H), 0.86 (d,  $J = 6.5$  Hz, 3H).  $^{13}\text{C}$  NMR (101 MHz,  $\text{CDCl}_3$ )  $\delta$  146.4, 142.9, 142.4, 129.5, (d,  $^3J_{\text{C-F}} = 8.7$  Hz), 129.4, 128.4, 128.1, 127.4, 126.0, 123.8, 121.7, 119.2, (d,  $^1J_{\text{C-F}} = 231.4$  Hz), 56.9, 50.7, 41.6, (d,  $^2J_{\text{C-F}} = 32.8$  Hz), 26.9, 23.4, (d,  $^2J_{\text{C-F}} = 28.1$  Hz), 20.6, 20.5.  $^{19}\text{F}$  NMR (376 MHz,  $\text{CDCl}_3$ )  $\delta$  -85.2. HRMS (ESI) calcd for  $\text{C}_{21}\text{H}_{25}\text{FN}_2\text{NaO}^+$  [ $\text{M} + \text{Na}^+$ ] 363.1843, found 363.1840.

**(Z)-N-Benzyl-4-fluoro-4-methyl-1-pentyl-4,5-dihydrobenzo[*d*][1,3]oxazepin-2(1*H*)-imine**

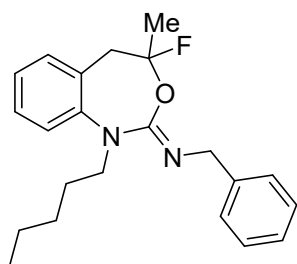

**2k** (145 mg, 82% yield, colorless liquid).

$^1\text{H}$  NMR (400 MHz,  $\text{CDCl}_3$ )  $\delta$  7.38 (s, 2H), 7.29 (d,  $J = 7.1$  Hz, 3H), 7.18 – 7.08 (m, 3H), 7.04 (d,  $J = 7.2$  Hz, 1H), 4.77 – 4.54 (m, 2H), 4.08 (m, 1H), 3.82 (m, 1H), 3.40 (t,  $J = 13.3$  Hz, 1H), 2.88 (d,  $J = 13.7$  Hz, 1H), 1.72 (d,  $J = 7.4$  Hz, 2H), 1.49 (d,  $J = 17.7$  Hz, 3H), 1.37 – 1.18 (m, 4H), 0.93 – 0.80 (m, 3H).  $^{13}\text{C}$  NMR (101 MHz,  $\text{CDCl}_3$ )  $\delta$  145.9, 143.1, 142.4, 129.4, 129.3, 128.6, 128.1, 127.4, 126.0, 123.9, 121.6, 119.5, (d,  $^1J_{\text{C-F}} = 231.1$  Hz), 50.8, 50.6, 41.4, (d,  $^2J_{\text{C-F}} = 32.8$  Hz), 29.3, 27.4, 23.3, (d,  $^2J_{\text{C-F}} = 28.1$  Hz), 22.5, 14.1.  $^{19}\text{F}$  NMR (376 MHz,  $\text{CDCl}_3$ )  $\delta$  -85.0. HRMS (ESI) calcd for  $\text{C}_{22}\text{H}_{27}\text{FN}_2\text{NaO}^+$  [ $\text{M} + \text{Na}^+$ ] 377.2000, found 377.2003.

**(Z)-N-Benzyl-1-cyclopentyl-4-fluoro-4-methyl-4,5-dihydrobenzo[*d*][1,3]oxazepin-2(1*H*)-imine**

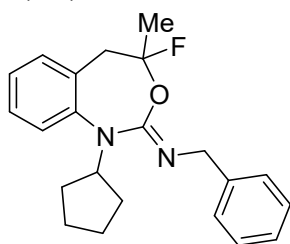

**2l** (148 mg, 84% yield, colorless liquid).

$^1\text{H}$  NMR (400 MHz,  $\text{CDCl}_3$ )  $\delta$  7.38 (d,  $J = 6.5$  Hz, 2H), 7.28 (dt,  $J = 14.1, 7.4$  Hz, 3H), 7.17 (dd,  $J = 18.2, 8.7$  Hz, 3H), 7.08 (t,  $J = 7.1$  Hz, 1H), 4.76 – 4.55 (m, 3H), 3.39 (t,  $J = 14.1$  Hz, 1H), 2.88 (d,  $J = 13.6$  Hz, 1H), 2.11 (s, 2H), 1.98 – 1.70 (m, 4H), 1.62 – 1.51 (m, 2H), 1.45 (d,  $J = 17.8$  Hz, 3H).  $^{13}\text{C}$  NMR (101 MHz,  $\text{CDCl}_3$ )  $\delta$  145.0, 142.7, 142.6, 131.3, (d,  $^3J_{\text{C-F}} = 8.6$  Hz), 128.8, 128.1, 128.0, 127.4, 125.9, 124.8, 124.2, 118.7, (d,  $^1J_{\text{C-F}} = 230.4$  Hz), 62.2, 50.8, 41.2, (d,  $^2J_{\text{C-F}} = 32.0$  Hz), 30.5, 28.7, 24.6, 24.4, 23.5, (d,  $^2J_{\text{C-F}} = 27.8$  Hz).  $^{19}\text{F}$  NMR (376 MHz,  $\text{CDCl}_3$ )  $\delta$  -86.3. HRMS (ESI) calcd for  $\text{C}_{22}\text{H}_{25}\text{FN}_2\text{NaO}^+ [\text{M} + \text{Na}^+]$  375.1843, found 375.1846.

**(Z)-N-Benzyl-1-cyclohexyl-4-fluoro-4-methyl-4,5-dihydrobenzo[d][1,3]oxazepin-2(1H)-imine**

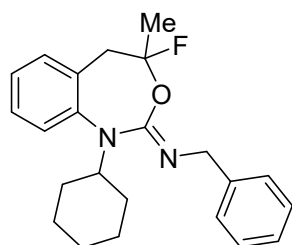

**2m** (154 mg, 84% yield, colorless liquid).

$^1\text{H}$  NMR (400 MHz,  $\text{CDCl}_3$ )  $\delta$  7.40 (d,  $J = 7.2$  Hz, 2H), 7.34 – 7.22 (m, 4H), 7.22 – 7.16 (m, 1H), 7.11 (m, 2H), 4.74 (d,  $J = 16.1$  Hz, 1H), 4.58 (d,  $J = 16.1$  Hz, 1H), 4.35 (t,  $J = 10.3$  Hz, 1H), 3.41 (t,  $J = 14.1$  Hz, 1H), 2.85 (d,  $J = 13.6$  Hz, 1H), 2.35 (d,  $J = 11.2$  Hz, 1H), 1.87 (m, 2H), 1.69 (m, 3H), 1.50 (d,  $J = 11.0$  Hz, 1H), 1.43 (d,  $J = 17.8$  Hz, 3H), 1.38 – 1.31 (m, 1H), 1.28 – 1.05 (m, 2H).  $^{13}\text{C}$  NMR (101 MHz,  $\text{CDCl}_3$ )  $\delta$  145.4, 142.8, 141.5, 131.6, (d,  $^3J_{\text{C-F}} = 8.7$  Hz), 128.8, 128.0, 127.8, 127.3, 125.9, 124.9, 124.7, 119.1, (d,  $^2J_{\text{C-F}} = 230.1$  Hz), 60.3, 50.6, 41.1, (d,  $^2J_{\text{C-F}} = 32.8$  Hz), 32.4, 30.9, 26.5, 25.9, 23.3, (d,  $^2J_{\text{C-F}} = 27.9$  Hz).  $^{19}\text{F}$  NMR (376 MHz,  $\text{CDCl}_3$ )  $\delta$  -86.3. HRMS (ESI) calcd for  $\text{C}_{23}\text{H}_{27}\text{FN}_2\text{NaO}^+ [\text{M} + \text{Na}^+]$  389.2000, found 389.2004.

**(Z)-N-Benzyl-1-(cyclohexylmethyl)-4-fluoro-4-methyl-4,5-dihydrobenzo[d][1,3]oxazepin-2(1H)-imine**

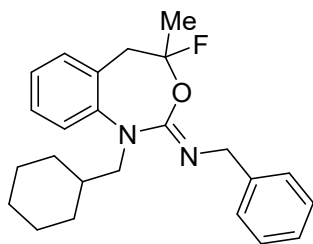

**2n** (167 mg, 86% yield, colorless liquid).

$^1\text{H}$  NMR (400 MHz,  $\text{CDCl}_3$ )  $\delta$  7.38 (d,  $J = 6.9$  Hz, 2H), 7.34 – 7.25 (m, 3H), 7.17 (m, 3H), 7.04 (t,  $J = 6.9$  Hz, 1H), 4.64 (q,  $J = 15.7$  Hz, 2H), 4.15 (m, 1H), 3.62 (m, 1H), 3.45 (t,  $J = 13.9$  Hz, 1H), 2.91 (d,  $J = 13.7$  Hz, 1H), 1.85 (s, 1H), 1.79 – 1.56 (m, 5H), 1.50 (d,  $J = 17.8$  Hz, 3H), 1.12 (s, 3H), 1.08 – 0.96 (m, 1H), 0.87 (m, 1H).  $^{13}\text{C}$  NMR (101 MHz,  $\text{CDCl}_3$ )  $\delta$  146.3, 143.2, 142.4, 129.4, 129.3, 128.4, 128.0, 127.3, 125.9, 123.7, 121.7, 119.3, (d,  $^1J_{\text{C-F}} = 231.1$  Hz), 56.0, 50.8, 41.6, (d,  $^2J_{\text{C-F}} = 32.8$  Hz), 36.3, 31.3, 31.2, 26.5, 26.0, 25.9, 23.3, (d,  $^2J_{\text{C-F}} = 28.1$  Hz).  $^{19}\text{F}$  NMR (376 MHz,  $\text{CDCl}_3$ )  $\delta$  -85.2. HRMS (ESI) calcd for  $\text{C}_{24}\text{H}_{29}\text{FN}_2\text{NaO}^+$  [ $\text{M} + \text{Na}^+$ ] 403.2156, found 403.2159.

**(Z)-N-Benzyl-1-(4-chlorobenzyl)-4-fluoro-4-methyl-4,5-dihydrobenzo[d][1,3]-oxazepin-2(1H)-imine**

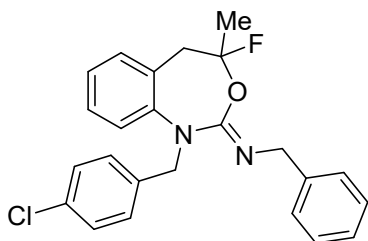

**2o** (162 mg, 79% yield, a white solid, mp: 127 – 128 °C).

$^1\text{H}$  NMR (400 MHz, Chloroform-*d*)  $\delta$  7.22 (m, 7H), 7.18 – 7.02 (m, 6H), 5.27 (d,  $J = 15.9$  Hz, 1H), 5.02 (d,  $J = 15.4$  Hz, 1H), 4.72 (d,  $J = 15.7$  Hz, 1H), 4.53 (d,  $J = 15.7$  Hz, 1H), 3.35 (t,  $J = 13.6$  Hz, 1H), 2.90 (d,  $J = 13.9$  Hz, 1H), 1.53 (d,  $J = 17.8$  Hz, 3H).  $^{13}\text{C}$  NMR (101 MHz,  $\text{CDCl}_3$ )  $\delta$  145.9, 143.0, 141.8, 137.2, 132.7, 129.5, 128.8, (d,  $^3J_{\text{C-F}} = 8.9$  Hz), 128.7, 128.6, 128.6, 128.0, 127.3, 126.0, 124.2, 119.9, (d,  $^1J_{\text{C-F}} = 244.1$  Hz), 53.5, 50.7, 41.4, (d,  $^2J_{\text{C-F}} = 32.6$  Hz), 23.2, (d,  $^2J_{\text{C-F}} = 28.0$  Hz).  $^{19}\text{F}$  NMR (376 MHz,  $\text{CDCl}_3$ )  $\delta$  -84.9. HRMS (ESI) calcd for  $\text{C}_{24}\text{H}_{22}^{35}\text{ClFN}_2\text{NaO}^+$  [ $\text{M} + \text{Na}^+$ ] 431.1297, found 431.1294.

**(Z)-N-Benzyl-4-fluoro-1-(4-methoxybenzyl)-4-methyl-4,5-dihydrobenzo[d][1,3]-**

**oxazepin-2(1*H*)-imine**

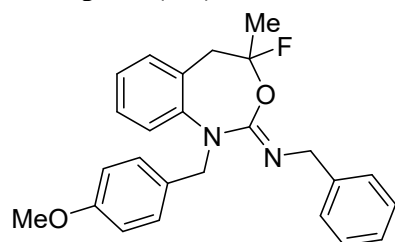

**2p** (172 mg, 85% yield, a white solid, mp: 91 – 93 °C).

<sup>1</sup>H NMR (400 MHz, CDCl<sub>3</sub>) δ 7.17 – 7.09 (m, 7H), 7.05 (m, 2H), 6.99 (d, *J* = 7.1 Hz, 1H), 6.92 (t, *J* = 7.3 Hz, 1H), 6.69 (d, *J* = 8.6 Hz, 2H), 5.10 (d, *J* = 15.6 Hz, 1H), 4.98 (d, *J* = 15.6 Hz, 1H), 4.65 (d, *J* = 15.8 Hz, 1H), 4.48 (d, *J* = 15.8 Hz, 1H), 3.65 (s, 3H), 3.24 (t, *J* = 13.6 Hz, 1H), 2.75 (d, *J* = 13.9 Hz, 1H), 1.41 (d, *J* = 17.8 Hz, 3H). <sup>13</sup>C NMR (101 MHz, CDCl<sub>3</sub>) δ 158.7, 146.2, 143.1, 142.1, 130.7, 129.4, 129.0, (d, <sup>3</sup>*J*<sub>C-F</sub> = 9.1 Hz), 128.6, 128.6, 128.0, 127.4, 126.0, 124.1, 121.5, 119.9, (d, <sup>1</sup>*J*<sub>C-F</sub> = 231.5 Hz), 113.8, 55.3, 53.4, 50.8, 41.4, (d, <sup>2</sup>*J*<sub>C-F</sub> = 32.5 Hz), 23.3, (d, <sup>2</sup>*J*<sub>C-F</sub> = 28.1 Hz). <sup>19</sup>F NMR (376 MHz, CDCl<sub>3</sub>) δ -84.9. HRMS (ESI) calcd for C<sub>25</sub>H<sub>25</sub>FN<sub>2</sub>NaO<sub>2</sub><sup>+</sup> [M + Na<sup>+</sup>] 427.1792, found 427.1788.

**(*Z*)-*N*-(3-Bromophenyl)-4-fluoro-1-(4-methoxybenzyl)-4-methyl-4,5-dihydrobenzo[*d*][1,3]oxazepin-2(1*H*)-imine**

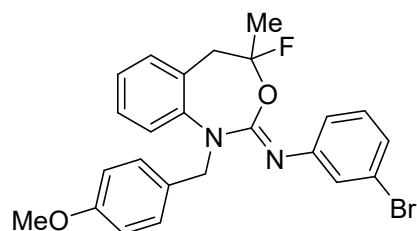

**2q** (181 mg, 77% yield, a white solid, mp: 126 – 127 °C).

<sup>1</sup>H NMR (400 MHz, CDCl<sub>3</sub>) δ 7.28 (m, 4H), 7.17 (s, 1H), 7.10 (m, 4H), 6.96 – 6.89 (m, 1H), 6.82 (d, *J* = 8.5 Hz, 2H), 5.24 (d, *J* = 15.2 Hz, 1H), 5.10 (d, *J* = 15.2 Hz, 1H), 3.77 (s, 3H), 3.19 (t, *J* = 13.7 Hz, 1H), 2.78 (d, *J* = 13.9 Hz, 1H), 1.34 (d, *J* = 17.7 Hz, 3H). <sup>13</sup>C NMR (101 MHz, CDCl<sub>3</sub>) δ 158.9, 148.7, 146.0, 141.9, 130.1, 129.8, (d, <sup>3</sup>*J*<sub>C-F</sub> = 8.6 Hz), 129.7, 129.4, 129.3, 129.0, 128.7, 126.3, 125.2, 122.3, 122.0, 121.7, 119.8, (d, <sup>1</sup>*J*<sub>C-F</sub> = 234.9 Hz), 113.9, 55.2, 53.6, 41.1, (d, <sup>2</sup>*J*<sub>C-F</sub> = 32.3 Hz), 23.2, (d, <sup>2</sup>*J*<sub>C-F</sub> = 27.5 Hz). <sup>19</sup>F NMR (376 MHz, CDCl<sub>3</sub>) δ -85.5. HRMS (ESI) calcd for C<sub>24</sub>H<sub>22</sub><sup>79</sup>BrFN<sub>2</sub>NaO<sub>2</sub><sup>+</sup> [M + Na<sup>+</sup>] 491.0741, found 491.0744.

**(Z)-1-Benzyl-4-fluoro-N-(4-fluorophenyl)-4-methyl-4,5-dihydrobenzo[d][1,3]oxazepin-2(1H)-imine**

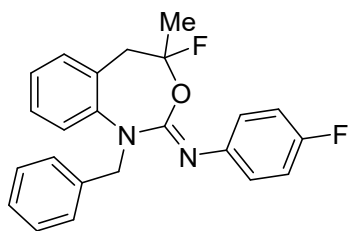

**2r** (144 mg, 76% yield, a white solid, mp: 139 - 140 °C).

$^1\text{H}$  NMR (400 MHz,  $\text{CDCl}_3$ )  $\delta$  7.40 (d,  $J = 7.2$  Hz, 2H), 7.38 – 7.31 (m, 3H), 7.31 – 7.27 (m, 2H), 7.15 (q,  $J = 7.2$  Hz, 2H), 6.97 (d,  $J = 7.0$  Hz, 4H), 5.34 (d,  $J = 15.4$  Hz, 2H), 3.33 (t,  $J = 14.1$  Hz, 1H), 2.88 (d,  $J = 14.0$  Hz, 1H), 1.41 (d,  $J = 17.7$  Hz, 3H).  $^{13}\text{C}$  NMR (101 MHz,  $\text{CDCl}_3$ )  $\delta$  158.8, (d,  $^1J_{\text{C-F-Ar}} = 240.7$  Hz), 145.5, 143.1, 142.3, 137.8, 129.5, (d,  $^3J_{\text{C-F}} = 8.8$  Hz), 129.4, 128.7, 128.5, 127.4, 127.2, 124.9, 124.1, (d,  $^3J_{\text{C-F-Ar}} = 7.9$  Hz), 121.9, 119.6, (d,  $^1J_{\text{C-F}} = 234.5$  Hz), 114.7, (d,  $^2J_{\text{C-F-Ar}} = 22.1$  Hz), 54.2, 41.3, (d,  $^2J_{\text{C-F}} = 32.5$  Hz), 23.2, (d,  $^2J_{\text{C-F}} = 27.5$  Hz).  $^{19}\text{F}$  NMR (376 MHz,  $\text{CDCl}_3$ )  $\delta$  -85.6, -122.2. HRMS (ESI) calcd for  $\text{C}_{23}\text{H}_{20}\text{F}_2\text{N}_2\text{NaO}^+$  [ $\text{M} + \text{Na}^+$ ] 401.1436, found 401.1434.

**(Z)-1-Benzyl-N-(4-chlorophenyl)-4-fluoro-4-methyl-4,5-dihydrobenzo[d][1,3]oxazepin-2(1H)-imine**

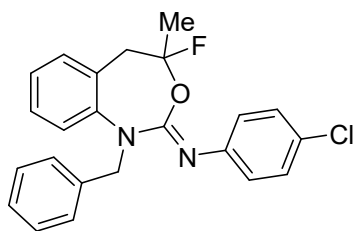

**2s** (160 mg, 81% yield, a white solid, mp: 158 - 159 °C).

$^1\text{H}$  NMR (400 MHz,  $\text{CDCl}_3$ )  $\delta$  7.44 – 7.21 (m, 9H), 7.16 (m, 2H), 6.96 (d,  $J = 8.4$  Hz, 2H), 5.30 (q,  $J = 15.6$  Hz, 2H), 3.33 (t,  $J = 13.7$  Hz, 1H), 2.89 (d,  $J = 14.0$  Hz, 1H), 1.42 (d,  $J = 17.7$  Hz, 3H).  $^{13}\text{C}$  NMR (101 MHz,  $\text{CDCl}_3$ )  $\delta$  145.8, 145.6, 142.2, 137.7, 129.5, (d,  $J = 17.7$  Hz, 3H), 129.5, (d,  $^3J_{\text{C-F}} = 8.5$  Hz), 129.4, 128.7, 128.5, 128.2, 127.4, 127.4, 127.3, 125.0, 124.4, 121.9, 119.7, (d,  $^1J_{\text{C-F}} = 234.6$  Hz), 54.2, 41.2, (d,  $^2J_{\text{C-F}} = 32.5$  Hz), 23.2, (d,  $^2J_{\text{C-F}} = 27.5$  Hz).  $^{19}\text{F}$  NMR (376 MHz,  $\text{CDCl}_3$ )  $\delta$  -85.5. HRMS (ESI) calcd for  $\text{C}_{23}\text{H}_{20}^{35}\text{ClFN}_2\text{NaO}^+$  [ $\text{M} + \text{Na}^+$ ] 417.1140, found 417.1142.

**(Z)-1-(4-((1-Benzyl-4-fluoro-4-methyl-4,5-dihydrobenzo[d][1,3]oxazepin-2(1H)-ylidene)amino)phenyl)ethan-1-one**

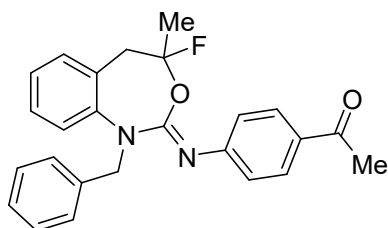

**2t** (169 mg, 84% yield, a white solid, mp: 151 - 152 °C).

<sup>1</sup>H NMR (400 MHz, CDCl<sub>3</sub>) δ 7.90 (d, *J* = 8.5 Hz, 2H), 7.43 – 7.24 (m, 7H), 7.15 (m, 2H), 7.05 (d, *J* = 8.5 Hz, 2H), 5.37 – 5.21 (m, 2H), 3.31 (t, *J* = 13.7 Hz, 1H), 2.87 (d, *J* = 14.0 Hz, 1H), 2.58 (s, 3H), 1.39 (d, *J* = 17.7 Hz, 3H). <sup>13</sup>C NMR (101 MHz, CDCl<sub>3</sub>) δ 196.4, 151.3, 144.8, 140.9, 136.5, 130.5, 128.4, (d, <sup>3</sup>*J*<sub>C-F</sub> = 9.1 Hz), 128.0, 127.7, 127.5, 126.4, 126.3, 124.2, 122.0, 120.9, 118.9, (d, <sup>1</sup>*J*<sub>C-F</sub> = 235.1 Hz), 53.2, 40.1, (d, <sup>2</sup>*J*<sub>C-F</sub> = 32.3 Hz), 25.4, 22.1, (d, <sup>2</sup>*J*<sub>C-F</sub> = 27.3 Hz). <sup>19</sup>F NMR (376 MHz, CDCl<sub>3</sub>) δ -85.4. HRMS (ESI) calcd for C<sub>25</sub>H<sub>23</sub>FN<sub>2</sub>NaO<sub>2</sub><sup>+</sup> [M + Na<sup>+</sup>] 425.1636, found 425.1639.

**(Z)-4-((1-Benzyl-4-fluoro-4-methyl-4,5-dihydrobenzo[d][1,3]oxazepin-2(1H)-ylidene)amino)benzonitrile**

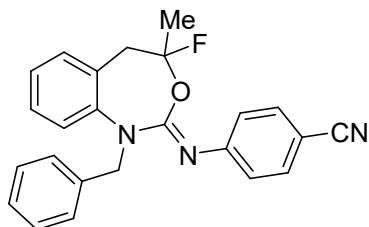

**2u** (144 mg, 73% yield, a white solid, mp: 161 - 162 °C).

<sup>1</sup>H NMR (400 MHz, CDCl<sub>3</sub>) δ 7.50 (d, *J* = 7.8 Hz, 2H), 7.38 – 7.22 (m, 7H), 7.14 (s, 2H), 7.01 (d, *J* = 7.8 Hz, 2H), 5.34 – 5.17 (m, 2H), 3.25 (t, *J* = 13.6 Hz, 1H), 2.84 (d, *J* = 13.9 Hz, 1H), 1.35 (d, *J* = 17.7 Hz, 3H). <sup>13</sup>C NMR (101 MHz, CDCl<sub>3</sub>) δ 151.8, 146.2, 141.8, 137.3, 132.5, 129.4, (d, <sup>3</sup>*J*<sub>C-F</sub> = 5.9 Hz), 128.9, 128.6, 127.5, 127.4, 125.5, 124.0, 122.1, 120.2, (d, <sup>1</sup>*J*<sub>C-F</sub> = 235.4 Hz), 119.9, 105.2, 54.4, 41.1, (d, <sup>2</sup>*J*<sub>C-F</sub> = 32.4 Hz), 23.1, (d, <sup>2</sup>*J*<sub>C-F</sub> = 27.3 Hz). <sup>19</sup>F NMR (376 MHz, CDCl<sub>3</sub>) δ -85.0. HRMS (ESI) calcd for C<sub>24</sub>H<sub>20</sub>FN<sub>3</sub>NaO<sup>+</sup> [M + Na<sup>+</sup>] 408.1483, found 408.1485.

**(Z)-1-Benzyl-4-fluoro-4-methyl-N-(4-nitrophenyl)-4,5-dihydrobenzo[d][1,3]-**

**oxazepin-2(1*H*)-imine**

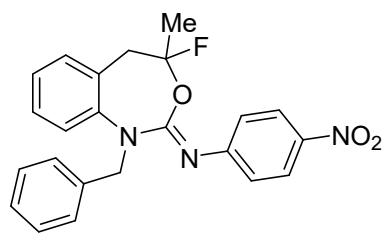

**2v** (152 mg, 75% yield, a white solid, mp: 171 - 172 °C).

<sup>1</sup>H NMR (400 MHz, CDCl<sub>3</sub>) δ 8.13 (d, *J* = 8.9 Hz, 2H), 7.33 (m, 7H), 7.16 (d, *J* = 4.0 Hz, 2H), 7.04 (d, *J* = 8.9 Hz, 2H), 5.27 (q, *J* = 15.6 Hz, 2H), 3.27 (t, *J* = 13.8 Hz, 1H), 2.88 (d, *J* = 14.0 Hz, 1H), 1.38 (d, *J* = 17.8 Hz, 3H). <sup>13</sup>C NMR (101 MHz, CDCl<sub>3</sub>) δ 154.3, 146.4, 142.7, 141.7, 137.2, 129.5, 129.4, (d, <sup>3</sup>*J*<sub>C-F</sub> = 8.8 Hz), 128.9, 128.7, 127.5, 127.4, 125.6, 124.4, 123.5, 122.1, 120.4, (d, <sup>1</sup>*J*<sub>C-F</sub> = 235.7 Hz), 54.4, 41.1, (d, <sup>2</sup>*J*<sub>C-F</sub> = 32.3 Hz), 23.1, (d, <sup>2</sup>*J*<sub>C-F</sub> = 27.1 Hz). <sup>19</sup>F NMR (376 MHz, CDCl<sub>3</sub>) δ -85.0. HRMS (ESI) calcd for C<sub>23</sub>H<sub>20</sub>FN<sub>3</sub>NaO<sub>3</sub><sup>+</sup> [M + Na<sup>+</sup>] 428.1381, found 428.1377.

**(*Z*)-1-Benzyl-4-fluoro-4-methyl-*N*-(*p*-tolyl)-4,5-dihydrobenzo[*d*][1,3]oxazepin-2(1*H*)-imine**

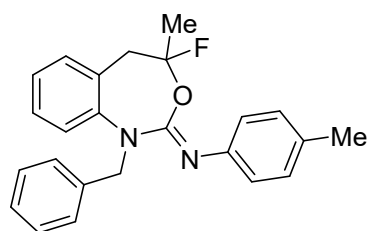

**2w** (152 mg, 81% yield, a white solid, mp: 108 - 109 °C).

<sup>1</sup>H NMR (400 MHz, CDCl<sub>3</sub>) δ 7.40 (d, *J* = 7.2 Hz, 2H), 7.31 (dd, *J* = 15.2, 7.5 Hz, 4H), 7.24 (d, *J* = 7.9 Hz, 1H), 7.16 – 7.10 (m, 2H), 7.07 (d, *J* = 8.1 Hz, 2H), 6.92 (d, *J* = 8.2 Hz, 2H), 5.30 (q, *J* = 15.7 Hz, 2H), 3.34 (t, *J* = 13.6 Hz, 1H), 2.86 (d, *J* = 13.9 Hz, 1H), 2.32 (s, 3H), 1.40 (d, *J* = 17.5 Hz, 3H). <sup>13</sup>C NMR (101 MHz, CDCl<sub>3</sub>) δ 142.4, 138.0, 137.9, 131.5, 129.6, 129.5, 129.3, 128.8, 128.6, 128.4, 128.2, (d, <sup>1</sup>*J*<sub>C-F</sub> = 220.7 Hz), 127.5, 124.7, 124.7, 122.8, 121.8, 54.1, 41.3, (d, <sup>2</sup>*J*<sub>C-F</sub> = 32.4 Hz), 23.3, (d, <sup>2</sup>*J*<sub>C-F</sub> = 27.6 Hz), 20.9. <sup>19</sup>F NMR (376 MHz, CDCl<sub>3</sub>) δ -86.0. HRMS (ESI) calcd for C<sub>23</sub>H<sub>20</sub>F<sub>2</sub>N<sub>2</sub>NaO<sup>+</sup> [M + Na<sup>+</sup>] 397.1687, found 397.1689.

**(*Z*)-1-Benzyl-4-fluoro-*N*-(4-methoxyphenyl)-4-methyl-4,5-dihydrobenzo[*d*][1,3]-**

**oxazepin-2(1H)-imine**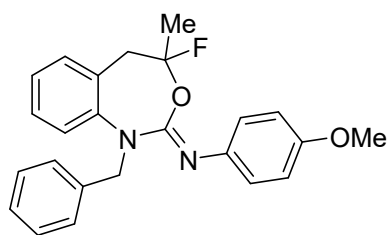

**2x** (164 mg, 84% yield, a white solid, mp: 115 – 116 °C).

$^1\text{H}$  NMR (400 MHz,  $\text{CDCl}_3$ )  $\delta$  7.42 (d,  $J = 7.2$  Hz, 2H), 7.39 – 7.27 (m, 5H), 7.15 (m, 2H), 7.02 (d,  $J = 8.7$  Hz, 2H), 6.86 (d,  $J = 8.8$  Hz, 2H), 5.40 – 5.26 (m, 2H), 3.83 (s, 3H), 3.36 (t,  $J = 13.6$  Hz, 1H), 2.89 (d,  $J = 13.9$  Hz, 1H), 1.44 (d,  $J = 17.7$  Hz, 3H).  $^{13}\text{C}$  NMR (101 MHz,  $\text{CDCl}_3$ )  $\delta$  155.2, 145.1, 142.4, 138.0, 129.5, (d,  $^3J_{\text{C-F}} = 8.6$  Hz), 129.3, 128.6, 128.4, 127.5, 127.1, 124.7, 123.9, 121.8, 119.5, (d,  $^1J_{\text{C-F}} = 233.6$  Hz), 113.5, 55.4, 54.1, 41.3, (d,  $^2J_{\text{C-F}} = 32.4$  Hz), 23.3, (d,  $^2J_{\text{C-F}} = 27.7$  Hz).  $^{19}\text{F}$  NMR (376 MHz,  $\text{CDCl}_3$ )  $\delta$  -86.3. HRMS (ESI) calcd for  $\text{C}_{24}\text{H}_{23}\text{FN}_2\text{NaO}_2^+$  [ $\text{M} + \text{Na}^+$ ] 413.1636, found 413.1632.

**(Z)-1-Benzyl-4-fluoro-4-methyl-N-(o-tolyl)-4,5-dihydrobenzo[d][1,3]oxazepin-2(1H)-imine**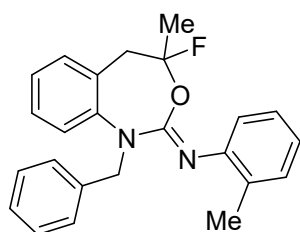

**2y** (108 mg, 58% yield, a colorless solid, mp: 114 – 115 °C).

$^1\text{H}$  NMR (400 MHz,  $\text{CDCl}_3$ )  $\delta$  7.38 (d,  $J = 7.3$  Hz, 2H), 7.33 – 7.22 (m, 5H), 7.08 (m, 4H), 6.89 (t,  $J = 7.4$  Hz, 1H), 6.84 (d,  $J = 7.7$  Hz, 1H), 5.36 (d,  $J = 15.7$  Hz, 1H), 5.26 – 5.17 (m, 1H), 3.33 (t,  $J = 13.5$  Hz, 1H), 2.84 (d,  $J = 13.9$  Hz, 1H), 2.08 (s, 3H), 1.31 (d,  $J = 17.6$  Hz, 3H).  $^{13}\text{C}$  NMR (101 MHz,  $\text{CDCl}_3$ )  $\delta$  146.0, 144.3, 142.6, 138.1, 130.4, 129.5, 129.4, 129.3, (d,  $^3J_{\text{C-F}} = 8.5$  Hz), 128.7, 128.5, 127.4, 127.1, 125.5, 124.7, 122.3, 121.7, 119.2, (d,  $^1J_{\text{C-F}} = 234.1$  Hz), 54.3, 41.4, (d,  $^2J_{\text{C-F}} = 32.5$  Hz), 29.7, 23.2, (d,  $^2J_{\text{C-F}} = 27.7$  Hz), 18.5.  $^{19}\text{F}$  NMR (376 MHz,  $\text{CDCl}_3$ )  $\delta$  -86.3. HRMS (ESI) calcd for  $\text{C}_{24}\text{H}_{23}\text{FN}_2\text{NaO}^+$  [ $\text{M} + \text{Na}^+$ ] 397.1687, found 397.1684.



### 3. The Synthetic Procedure and Spectroscopic Data of 2aa.<sup>[4]</sup>

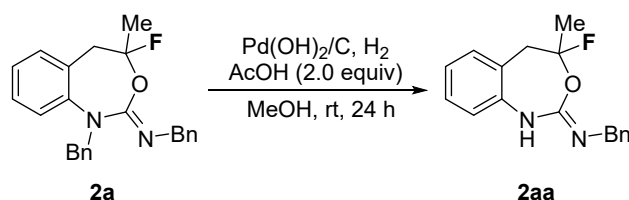

To a mixture of compound **2a** (50 mg, 1.0 equiv) and 15% palladium hydroxide on charcoal (30 mg) in MeOH (5 mL) was added AcOH (16.04 mg, 2.0 equiv). The resulting mixture was kept stirring at room temperature under a H<sub>2</sub> atmosphere until TLC indicated the total consumption of substrate **2a**. After filtered the palladium catalyst and washed filter cake with EtOAc, the solvent was removed under vacuum and the residue was purified by flash column chromatography on silica gel (PE/EtOAc = 10/1) to afford product **2aa**.

#### (Z)-N-Benzyl-4-fluoro-4-methyl-4,5-dihydrobenzo[d][1,3]oxazepin-2(1H)-imine

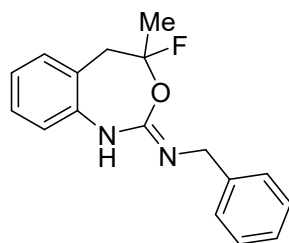

**2aa** (24 mg, 63% yield, colorless liquid).

<sup>1</sup>H NMR (400 MHz, CDCl<sub>3</sub>) δ 7.42 – 7.34 (m, 4H), 7.32 – 7.23 (m, 2H), 7.12 (d, *J* = 7.2 Hz, 1H), 7.06 – 6.97 (m, 2H), 4.81 (s, 1H), 4.63 – 4.50 (m, 2H), 3.27 (t, *J* = 13.2 Hz, 1H), 2.95 (d, *J* = 14.0 Hz, 1H), 1.56 (d, *J* = 17.7 Hz, 3H). <sup>13</sup>C NMR (101 MHz, CDCl<sub>3</sub>) δ 149.6, 145.9, 138.2, 128.9, 128.7, 128.4, 127.7, 127.5, 126.9, (d, <sup>3</sup>*J*<sub>C-F</sub> = 9.4 Hz), 124.0, 122.9, 122.6, (d, <sup>1</sup>*J*<sub>C-F</sub> = 230.6 Hz), 46.4, 41.8, (d, <sup>2</sup>*J*<sub>C-F</sub> = 31.5 Hz), 23.8, (d, <sup>2</sup>*J*<sub>C-F</sub> = 28.9 Hz). <sup>19</sup>F NMR (376 MHz, CDCl<sub>3</sub>) δ -75.2. HRMS (ESI) calcd for C<sub>17</sub>H<sub>17</sub>FN<sub>2</sub>NaO<sup>+</sup> [M + Na<sup>+</sup>] 307.1217, found 307.1214.

### 4. The Synthetic Procedure and Spectroscopic Data of 2ad.

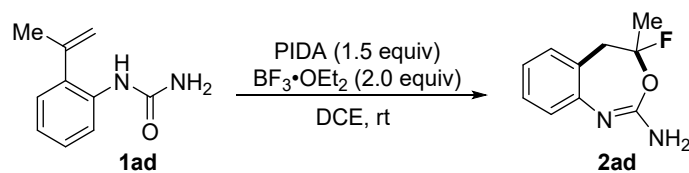

To a reaction flask filled with PIDA (1.5 equiv, 0.75 mmol) in DCE (5.0 mL) was added  $\text{BF}_3\cdot\text{OEt}_2$  (2.0 equiv, 1 mmol). The mixture was stirred at room temperature for 1 min and reactant **1ad** (0.5 mmol) was added. The resulting mixture was kept stirring until TLC indicated the total consumption of substrate **1ad**. Then the reaction mixture was quenched with aqueous saturated  $\text{NaHCO}_3$  (5 mL), and extracted with EtOAc (10 mL x 3). The combined organic layers were washed with brine and dried over anhydrous  $\text{Na}_2\text{SO}_4$ . After filtered, the mixture was concentrated under vacuum. The residue was purified by flash column chromatography on silica gel (PE/EtOAc = 4/1 +1%  $\text{Et}_3\text{N}$ ) to afford target product **2ad**.

#### 4-Fluoro-4-methyl-4,5-dihydrobenzo[*d*][1,3]oxazepin-2-amine

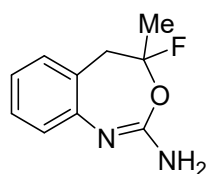

**2ad** (52 mg, 54% yield, a white solid, mp: 122 - 123 °C).

$^1\text{H}$  NMR (400 MHz,  $\text{CDCl}_3$ )  $\delta$  7.24 (t,  $J = 6.6$  Hz, 1H), 7.12 (d,  $J = 7.3$  Hz, 1H), 7.03 – 6.95 (m, 2H), 5.29 (s, 2H), 3.29 (t,  $J = 12.9$  Hz, 1H), 2.97 (d,  $J = 14.1$  Hz, 1H), 1.56 (d,  $J = 17.7$  Hz, 3H).  $^{13}\text{C}$  NMR (101 MHz,  $\text{CDCl}_3$ )  $\delta$  150.9, 145.2, 129.0, 128.5, 127.0, (d,  $^3J_{\text{C-F}} = 9.4$  Hz), 123.6, 123.3, 122.2, (d,  $^1J_{\text{C-F}} = 230.7$  Hz), 41.6, (d,  $^2J_{\text{C-F}} = 31.3$  Hz), 23.9, (d,  $^2J_{\text{C-F}} = 29.0$  Hz).  $^{19}\text{F}$  NMR (376 MHz,  $\text{CDCl}_3$ )  $\delta$  -75.2. HRMS (ESI) calcd for  $\text{C}_{10}\text{H}_{11}\text{FN}_2\text{NaO}^+$  [ $\text{M} + \text{Na}^+$ ] 217.0748, found 217.0745.

#### 5. Other Boron Lewis Acid Effect under Standard Conditions.

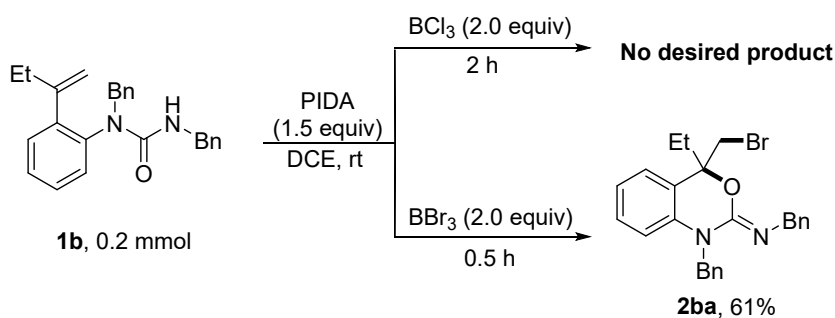

**Figure. S1** The study on the effect of  $\text{BCl}_3$  or  $\text{BBr}_3$ .

**(Z)-N,1-Dibenzyl-4-(bromomethyl)-4-ethyl-1,4-dihydro-2H-benzo[d][1,3]oxazin-2-imine**

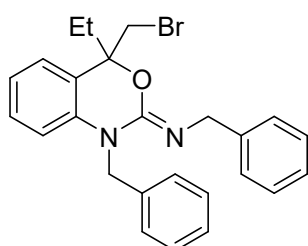

**2ba** (55 mg, 61% yield, colorless liquid).

$^1\text{H}$  NMR (400 MHz,  $\text{CDCl}_3$ )  $\delta$  7.28 (m, 9H), 7.15 (q,  $J = 7.4$  Hz, 2H), 7.04 (d,  $J = 7.4$  Hz, 1H), 6.91 (t,  $J = 7.3$  Hz, 1H), 6.77 (d,  $J = 8.1$  Hz, 1H), 5.45 – 5.19 (m, 2H), 4.66 (s, 2H), 3.67 – 3.54 (q,  $J = 15.4$  Hz, 11.0 Hz, 2H), 2.31 (m, 1H), 2.09 (m, 1H), 0.92 (t,  $J = 7.3$  Hz, 3H).  $^{13}\text{C}$  NMR (101 MHz,  $\text{CDCl}_3$ )  $\delta$  146.4, 142.4, 138.1, 137.5, 129.4, 128.6, 128.0, 127.5, 126.9, 126.7, 126.0, 124.7, 122.1, 120.8, 114.0, 81.2, 49.6, 48.1, 38.1, 29.0, 7.9. HRMS (ESI) calcd for  $\text{C}_{25}\text{H}_{25}^{79}\text{BrN}_2\text{NaO}^+$  [ $\text{M} + \text{Na}^+$ ] 471.1042, found 471.1038.

**6. High Resolution Mass Spectrometry of  $\text{AcOBF}_2$ .**

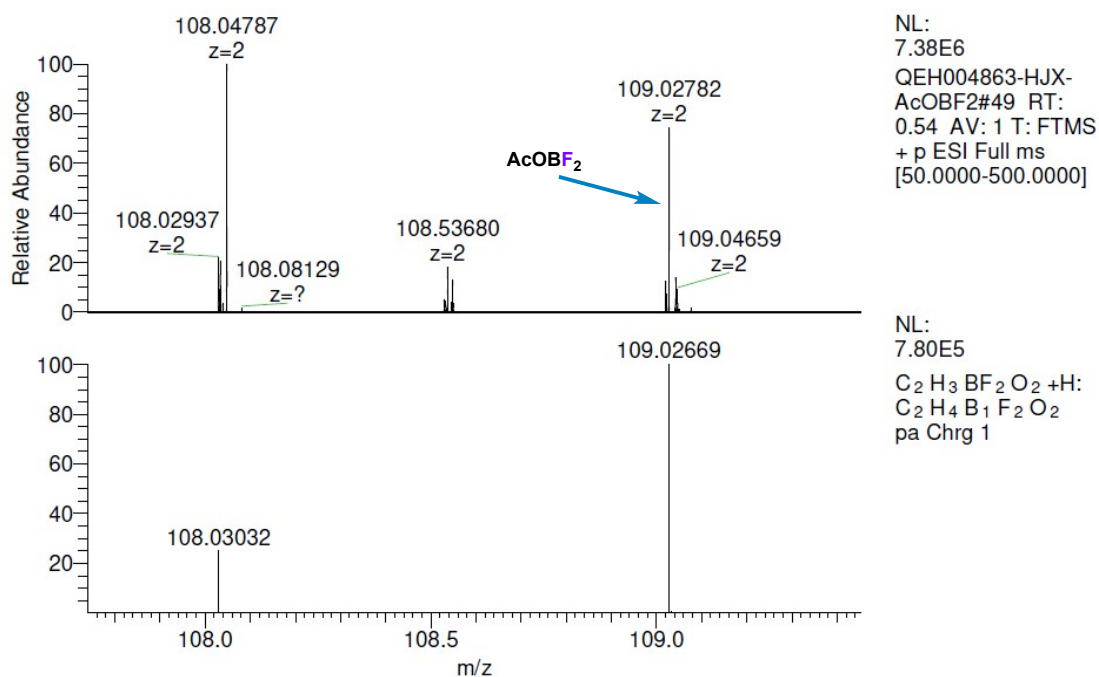

**Figure. S2** High Resolution Mass Spectrometry of AcOBF<sub>2</sub>

## 7. Solution-phase <sup>1</sup>H-NMR spectroscopy of PIDA and PIDA-BF<sub>3</sub> complex in CDCl<sub>3</sub>.

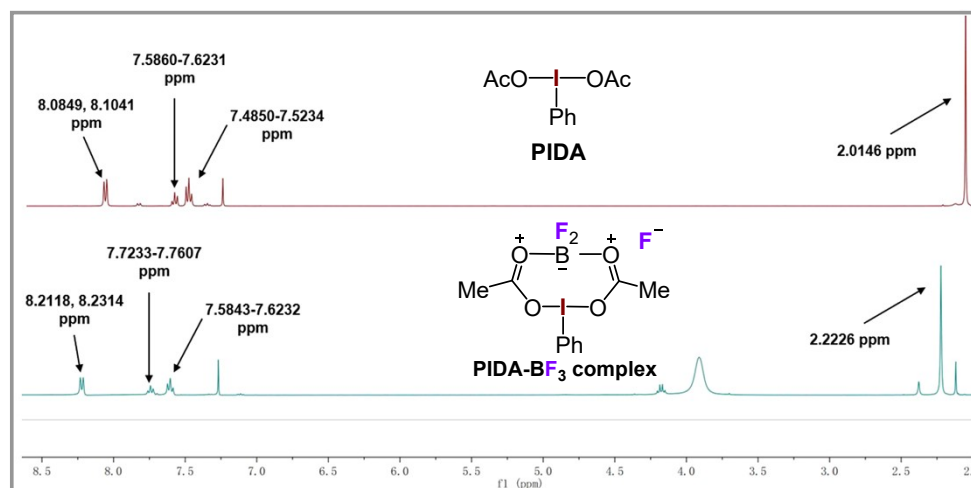

**Figure. S3** Solution-phase <sup>1</sup>H-NMR spectroscopy of PIDA and PIDA-BF<sub>3</sub> complex in CDCl<sub>3</sub>

To gain a better understanding of the process of this oxidative fluorination mediated by PIDA/BF<sub>3</sub>·Et<sub>2</sub>O system, the solution-phase NMR spectroscopy was conducted: (1) the <sup>1</sup>H NMR spectrum collected from a sample of phenyliodine(III) diacetate (PIDA) dissolved in CDCl<sub>3</sub>; (2) the <sup>1</sup>H NMR spectrum collected from the reaction mixture of 1 equiv of PIDA with 1 equiv of BF<sub>3</sub>·OEt<sub>2</sub> in CDCl<sub>3</sub> at rt for 5 min.



### III. X-ray Crystal Structure and Data

#### Product 2u:

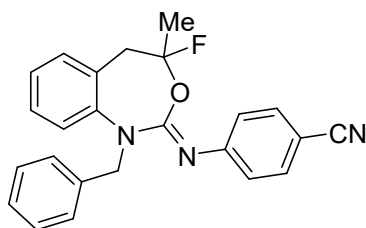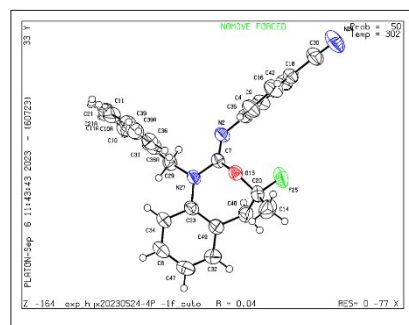

**Table 1 Crystal data and structure refinement for 2u.**

|                                        |                                                   |
|----------------------------------------|---------------------------------------------------|
| Identification code                    | 2u                                                |
| Empirical formula                      | C <sub>24</sub> H <sub>20</sub> FN <sub>3</sub> O |
| Formula weight                         | 385.43                                            |
| Temperature/K                          | 301.57(10)                                        |
| Crystal system                         | triclinic                                         |
| Space group                            | P-1                                               |
| a/Å                                    | 9.3241(2)                                         |
| b/Å                                    | 10.9750(2)                                        |
| c/Å                                    | 11.7780(2)                                        |
| $\alpha$ /°                            | 111.810(2)                                        |
| $\beta$ /°                             | 91.382(2)                                         |
| $\gamma$ /°                            | 112.051(2)                                        |
| Volume/Å <sup>3</sup>                  | 1018.22(4)                                        |
| Z                                      | 2                                                 |
| $\rho_{\text{calc}}/\text{cm}^3$       | 1.257                                             |
| $\mu/\text{mm}^{-1}$                   | 0.686                                             |
| F(000)                                 | 404.0                                             |
| Crystal size/mm <sup>3</sup>           | 0.4 × 0.3 × 0.2                                   |
| Radiation                              | Cu K $\alpha$ ( $\lambda$ = 1.54184)              |
| 2 $\theta$ range for data collection/° | 8.236 to 150.272                                  |

|                                             |                                                               |
|---------------------------------------------|---------------------------------------------------------------|
| Index ranges                                | -11 ≤ h ≤ 11, -13 ≤ k ≤ 13, -14 ≤ l ≤ 14                      |
| Reflections collected                       | 35065                                                         |
| Independent reflections                     | 4022 [R <sub>int</sub> = 0.0280, R <sub>sigma</sub> = 0.0097] |
| Data/restraints/parameters                  | 4022/284/309                                                  |
| Goodness-of-fit on F <sup>2</sup>           | 1.028                                                         |
| Final R indexes [I ≥ 2σ (I)]                | R <sub>1</sub> = 0.0380, wR <sub>2</sub> = 0.1016             |
| Final R indexes [all data]                  | R <sub>1</sub> = 0.0397, wR <sub>2</sub> = 0.1029             |
| Largest diff. peak/hole / e Å <sup>-3</sup> | 0.16/-0.17                                                    |

**Table 2 Fractional Atomic Coordinates (×10<sup>4</sup>) and Equivalent Isotropic Displacement Parameters (Å<sup>2</sup>×10<sup>3</sup>) for 2u. U<sub>eq</sub> is defined as 1/3 of the trace of the orthogonalised U<sub>ij</sub> tensor.**

| Atom | x          | y          | z          | U(eq)     |
|------|------------|------------|------------|-----------|
| O13  | 2732.5(9)  | 3592.1(7)  | 3689.7(7)  | 43.40(18) |
| F25  | 589.4(10)  | 4036.9(10) | 4103.6(8)  | 74.7(3)   |
| N27  | 2454.5(11) | 1257.9(9)  | 2602.4(8)  | 45.1(2)   |
| N2   | 2131.0(12) | 1975.1(10) | 4640.2(8)  | 48.7(2)   |
| C7   | 2389.7(12) | 2261.2(11) | 3694.6(10) | 41.5(2)   |
| C31  | 4170.6(14) | 169.2(12)  | 3100.1(9)  | 44.7(3)   |
| C33  | 2423.8(13) | 1417.4(11) | 1458.9(10) | 44.9(2)   |
| C29  | 2549.0(13) | -29.6(11)  | 2631.6(11) | 46.1(3)   |
| C35  | 2169.6(13) | 3003.4(11) | 5801.5(10) | 43.3(2)   |
| C9   | 942.8(14)  | 2588.3(13) | 6414.1(10) | 50.7(3)   |
| C49  | 1456.8(14) | 2005.3(13) | 1155.6(11) | 51.0(3)   |
| C36  | 5561(8)    | 1425(7)    | 3493(11)   | 51.3(14)  |
| C42  | 901.8(14)  | 3512.5(13) | 7572.7(10) | 52.3(3)   |
| C40  | 468.6(15)  | 2498.1(14) | 2051.8(12) | 56.0(3)   |
| C34  | 3313.3(16) | 930.0(14)  | 617.0(11)  | 56.0(3)   |

**Table 2 Fractional Atomic Coordinates ( $\times 10^4$ ) and Equivalent Isotropic Displacement Parameters ( $\text{\AA}^2 \times 10^3$ ) for 2u.  $U_{eq}$  is defined as 1/3 of of the trace of the orthogonalised  $U_{IJ}$  tensor.**

| Atom | x          | y          | z           | U(eq)    |
|------|------------|------------|-------------|----------|
| C18  | 2125.0(15) | 4866.8(13) | 8162.4(10)  | 51.4(3)  |
| C20  | 1500.0(14) | 3823.2(13) | 3195.1(11)  | 51.1(3)  |
| C16  | 3394.3(16) | 5266.6(14) | 7583.6(12)  | 63.0(3)  |
| C4   | 3415.3(15) | 4345.5(14) | 6413.3(12)  | 58.4(3)  |
| C10  | 4224(9)    | -1084(7)   | 3144(10)    | 48.3(11) |
| C30  | 2041.6(19) | 5839.6(16) | 9354.6(13)  | 67.4(4)  |
| N24  | 1924(2)    | 6601.1(17) | 10284.5(13) | 98.8(5)  |
| C32  | 1450(2)    | 2133.4(17) | 29.0(12)    | 69.3(4)  |
| C8   | 3267(2)    | 1054.6(17) | -506.3(12)  | 71.0(4)  |
| C14  | 2265(2)    | 5184.1(15) | 3011.9(16)  | 74.3(4)  |
| C39  | 6971(9)    | 1411(9)    | 3894(9)     | 61.3(15) |
| C11  | 7004(9)    | 185(9)     | 3918(7)     | 60.6(14) |
| C47  | 2345(2)    | 1663.4(19) | -796.8(13)  | 79.6(5)  |
| C21  | 5639(10)   | -1059(8)   | 3547(10)    | 61.5(12) |
| C36A | 5372(15)   | 1487(14)   | 3369(19)    | 63(3)    |
| C10A | 4586(19)   | -822(16)   | 3255(18)    | 65(3)    |
| C21A | 6070(20)   | -590(20)   | 3657(15)    | 73(3)    |
| C11A | 7269(18)   | 730(20)    | 3925(11)    | 76(3)    |
| C39A | 6939(15)   | 1790(20)   | 3798(16)    | 72(3)    |

**Table 3 Anisotropic Displacement Parameters ( $\text{\AA}^2 \times 10^3$ ) for 2u. The Anisotropic displacement factor exponent takes the form:  $-2\pi^2[h^2a^{*2}U_{11}+2hka^*b^*U_{12}+\dots]$ .**

| Atom | $U_{11}$ | $U_{22}$ | $U_{33}$ | $U_{23}$ | $U_{13}$ | $U_{12}$ |
|------|----------|----------|----------|----------|----------|----------|
|------|----------|----------|----------|----------|----------|----------|



**Table 3 Anisotropic Displacement Parameters ( $\text{\AA}^2 \times 10^3$ ) for 2u. The Anisotropic displacement factor exponent takes the form:  $-2\pi^2[\text{h}^2\text{a}^*2\text{U}_{11}+2\text{hka}^*\text{b}^*\text{U}_{12}+\dots]$ .**

| Atom | $U_{11}$  | $U_{22}$ | $U_{33}$ | $U_{23}$ | $U_{13}$ | $U_{12}$ |
|------|-----------|----------|----------|----------|----------|----------|
| O13  | 48.8(4)   | 36.8(4)  | 43.4(4)  | 14.5(3)  | 11.6(3)  | 18.3(3)  |
| F25  | 70.1(5)   | 84.6(6)  | 69.6(5)  | 16.7(4)  | 30.4(4)  | 46.1(4)  |
| N27  | 59.6(5)   | 39.7(5)  | 38.3(5)  | 13.8(4)  | 14.7(4)  | 24.7(4)  |
| N2   | 62.6(6)   | 43.1(5)  | 39.8(5)  | 15.4(4)  | 15.8(4)  | 22.4(4)  |
| C7   | 44.9(5)   | 37.4(5)  | 39.9(5)  | 12.9(4)  | 11.5(4)  | 17.6(4)  |
| C31  | 57.0(6)   | 44.3(6)  | 32.2(5)  | 12.9(4)  | 13.5(4)  | 22.8(5)  |
| C33  | 53.4(6)   | 40.8(5)  | 35.9(5)  | 11.1(4)  | 9.2(4)   | 19.3(5)  |
| C29  | 54.4(6)   | 33.8(5)  | 46.1(6)  | 13.2(4)  | 13.5(5)  | 17.0(5)  |
| C35  | 51.0(6)   | 42.6(5)  | 37.1(5)  | 15.7(4)  | 10.3(4)  | 20.7(5)  |
| C9   | 52.6(6)   | 46.8(6)  | 40.1(6)  | 14.5(5)  | 10.0(5)  | 11.1(5)  |
| C49  | 56.0(6)   | 49.7(6)  | 42.8(6)  | 12.6(5)  | 6.1(5)   | 23.8(5)  |
| C36  | 51(3)     | 43.6(18) | 50(3)    | 15.1(15) | 12(2)    | 13.3(17) |
| C42  | 52.4(6)   | 60.0(7)  | 41.5(6)  | 19.2(5)  | 14.3(5)  | 21.5(5)  |
| C40  | 51.6(6)   | 61.1(7)  | 55.8(7)  | 18.8(6)  | 8.6(5)   | 29.2(6)  |
| C34  | 70.8(8)   | 59.3(7)  | 40.4(6)  | 13.7(5)  | 15.5(5)  | 36.0(6)  |
| C18  | 62.5(7)   | 50.2(6)  | 38.8(6)  | 12.5(5)  | 9.2(5)   | 26.4(5)  |
| C20  | 55.9(6)   | 51.8(6)  | 52.6(6)  | 18.0(5)  | 18.0(5)  | 32.4(5)  |
| C16  | 64.2(8)   | 46.2(6)  | 51.0(7)  | 8.4(5)   | 8.0(6)   | 6.4(6)   |
| C4   | 54.1(7)   | 54.2(7)  | 50.3(6)  | 15.8(5)  | 17.4(5)  | 10.8(5)  |
| C10  | 58(2)     | 41.5(17) | 44.8(17) | 18.5(14) | 3.6(18)  | 20.1(15) |
| C30  | 80.7(9)   | 61.4(8)  | 49.2(7)  | 9.3(6)   | 12.7(6)  | 31.4(7)  |
| N24  | 117.0(12) | 88.0(10) | 61.0(8)  | -3.6(7)  | 21.5(8)  | 45.0(9)  |
| C32  | 93.0(10)  | 78.5(9)  | 47.7(7)  | 23.8(6)  | 8.8(7)   | 49.3(8)  |
| C8   | 96.7(11)  | 82.4(10) | 42.0(6)  | 19.8(6)  | 26.1(7)  | 50.4(9)  |
| C14  | 90.5(10)  | 55.1(8)  | 87.6(10) | 33.2(7)  | 12.2(8)  | 37.1(8)  |

**Table 3 Anisotropic Displacement Parameters ( $\text{\AA}^2 \times 10^3$ ) for 2u. The Anisotropic displacement factor exponent takes the form:  $-2\pi^2[h^2a^{*2}U_{11}+2hka^*b^*U_{12}+\dots]$ .**

| Atom | $U_{11}$  | $U_{22}$ | $U_{33}$ | $U_{23}$ | $U_{13}$ | $U_{12}$ |
|------|-----------|----------|----------|----------|----------|----------|
| C39  | 55(2)     | 62(3)    | 53(2)    | 15(2)    | 8.9(17)  | 19.3(18) |
| C11  | 66(3)     | 70(4)    | 41.3(15) | 14(2)    | 2.1(19)  | 33(3)    |
| C47  | 120.3(14) | 94.8(11) | 42.1(7)  | 29.8(7)  | 22.1(8)  | 61.4(11) |
| C21  | 75(3)     | 61(3)    | 54.1(19) | 23(2)    | 4(2)     | 35(2)    |
| C36A | 53(3)     | 81(5)    | 50(4)    | 14(3)    | 7(2)     | 34(3)    |
| C10A | 79(6)     | 71(6)    | 52(5)    | 28(5)    | 18(4)    | 34(5)    |
| C21A | 86(7)     | 97(9)    | 52(5)    | 32(8)    | 8(6)     | 55(7)    |
| C11A | 74(4)     | 108(10)  | 52(3)    | 26(6)    | 8(3)     | 51(6)    |
| C39A | 60(4)     | 93(7)    | 54(3)    | 19(5)    | 10(2)    | 35(4)    |

**Table 4 Bond Lengths for 2u.**

| Atom | Atom | Length/ $\text{\AA}$ | Atom | Atom | Length/ $\text{\AA}$ |
|------|------|----------------------|------|------|----------------------|
| O13  | C7   | 1.3753(12)           | C49  | C32  | 1.3854(18)           |
| O13  | C20  | 1.4215(14)           | C36  | C39  | 1.393(7)             |
| F25  | C20  | 1.3884(14)           | C42  | C18  | 1.3836(17)           |
| N27  | C7   | 1.3683(13)           | C40  | C20  | 1.5118(17)           |
| N27  | C33  | 1.4221(14)           | C34  | C8   | 1.3810(19)           |
| N27  | C29  | 1.4611(13)           | C18  | C16  | 1.3889(19)           |
| N2   | C7   | 1.2700(14)           | C18  | C30  | 1.4392(17)           |
| N2   | C35  | 1.4021(13)           | C20  | C14  | 1.4943(19)           |
| C31  | C29  | 1.5036(16)           | C16  | C4   | 1.3795(17)           |
| C31  | C36  | 1.397(5)             | C10  | C21  | 1.377(7)             |
| C31  | C10  | 1.415(6)             | C30  | N24  | 1.1420(18)           |
| C31  | C36A | 1.369(11)            | C32  | C47  | 1.378(2)             |

**Table 4 Bond Lengths for 2u.**

| Atom | Atom | Length/Å   | Atom | Atom | Length/Å  |
|------|------|------------|------|------|-----------|
| C31  | C10A | 1.352(11)  | C8   | C47  | 1.375(2)  |
| C33  | C49  | 1.3962(16) | C39  | C11  | 1.369(6)  |
| C33  | C34  | 1.3914(16) | C11  | C21  | 1.378(5)  |
| C35  | C9   | 1.3890(16) | C36A | C39A | 1.406(11) |
| C35  | C4   | 1.3872(16) | C10A | C21A | 1.351(10) |
| C9   | C42  | 1.3768(16) | C21A | C11A | 1.363(10) |
| C49  | C40  | 1.5009(17) | C11A | C39A | 1.368(9)  |

**Table 5 Bond Angles for 2u.**

| Atom | Atom | Atom | Angle/°    | Atom | Atom | Atom | Angle/°    |
|------|------|------|------------|------|------|------|------------|
| C7   | O13  | C20  | 118.31(8)  | C49  | C40  | C20  | 110.48(10) |
| C7   | N27  | C33  | 122.87(9)  | C8   | C34  | C33  | 120.11(12) |
| C7   | N27  | C29  | 117.62(9)  | C42  | C18  | C16  | 119.36(11) |
| C33  | N27  | C29  | 119.51(8)  | C42  | C18  | C30  | 119.20(12) |
| C7   | N2   | C35  | 122.86(9)  | C16  | C18  | C30  | 121.43(12) |
| N27  | C7   | O13  | 114.38(9)  | O13  | C20  | C40  | 110.32(9)  |
| N2   | C7   | O13  | 124.37(9)  | O13  | C20  | C14  | 106.66(11) |
| N2   | C7   | N27  | 121.10(10) | F25  | C20  | O13  | 106.54(9)  |
| C36  | C31  | C29  | 127.3(4)   | F25  | C20  | C40  | 108.08(10) |
| C36  | C31  | C10  | 118.9(4)   | F25  | C20  | C14  | 108.86(10) |
| C10  | C31  | C29  | 113.7(3)   | C14  | C20  | C40  | 115.99(12) |
| C36A | C31  | C29  | 116.6(7)   | C4   | C16  | C18  | 120.54(11) |
| C10A | C31  | C29  | 127.3(7)   | C16  | C4   | C35  | 120.33(11) |
| C10A | C31  | C36A | 116.0(8)   | C21  | C10  | C31  | 119.9(5)   |

**Table 5 Bond Angles for 2u.**

| Atom | Atom | Atom | Angle/°    | Atom | Atom | Atom | Angle/°    |
|------|------|------|------------|------|------|------|------------|
| C49  | C33  | N27  | 120.33(10) | N24  | C30  | C18  | 177.67(18) |
| C34  | C33  | N27  | 119.72(10) | C47  | C32  | C49  | 121.27(13) |
| C34  | C33  | C49  | 119.90(11) | C47  | C8   | C34  | 120.19(13) |
| N27  | C29  | C31  | 114.85(9)  | C11  | C39  | C36  | 120.7(6)   |
| C9   | C35  | N2   | 117.14(10) | C39  | C11  | C21  | 120.4(6)   |
| C4   | C35  | N2   | 124.02(10) | C8   | C47  | C32  | 119.84(13) |
| C4   | C35  | C9   | 118.58(10) | C10  | C21  | C11  | 120.5(6)   |
| C42  | C9   | C35  | 121.27(11) | C31  | C36A | C39A | 121.5(11)  |
| C33  | C49  | C40  | 119.84(10) | C21A | C10A | C31  | 124.6(9)   |
| C32  | C49  | C33  | 118.65(11) | C10A | C21A | C11A | 119.2(9)   |
| C32  | C49  | C40  | 121.50(12) | C21A | C11A | C39A | 119.6(10)  |
| C39  | C36  | C31  | 119.6(6)   | C11A | C39A | C36A | 119.0(11)  |
| C9   | C42  | C18  | 119.80(11) |      |      |      |            |

**Table 6 Torsion Angles for 2u.**

| A   | B   | C   | D   | Angle/°     | A   | B   | C   | D   | Angle/°     |
|-----|-----|-----|-----|-------------|-----|-----|-----|-----|-------------|
| N27 | C33 | C49 | C40 | 1.20(17)    | C35 | C9  | C42 | C18 | -2.03(19)   |
| N27 | C33 | C49 | C32 | -179.51(12) | C9  | C35 | C4  | C16 | -2.8(2)     |
| N27 | C33 | C34 | C8  | 178.72(12)  | C9  | C42 | C18 | C16 | -1.09(19)   |
| N2  | C35 | C9  | C42 | 178.32(11)  | C9  | C42 | C18 | C30 | 177.93(12)  |
| N2  | C35 | C4  | C16 | -176.72(12) | C49 | C33 | C34 | C8  | 1.4(2)      |
| C7  | O13 | C20 | F25 | 77.68(11)   | C49 | C40 | C20 | O13 | -50.37(14)  |
| C7  | O13 | C20 | C40 | -39.40(13)  | C49 | C40 | C20 | F25 | -166.48(10) |
| C7  | O13 | C20 | C14 | -166.17(10) | C49 | C40 | C20 | C14 | 71.01(14)   |

**Table 6 Torsion Angles for 2u.**

| A   | B    | C    | D    | Angle/°    | A    | B    | C    | D    | Angle/°     |
|-----|------|------|------|------------|------|------|------|------|-------------|
| C7  | N27  | C33  | C49  | -38.66(16) | C49  | C32  | C47  | C8   | 0.0(3)      |
| C7  | N27  | C33  | C34  | 144.00(12) | C36  | C31  | C29  | N27  | -0.4(6)     |
| C7  | N27  | C29  | C31  | -80.84(12) | C36  | C31  | C10  | C21  | -1.3(13)    |
| C7  | N2   | C35  | C9   | 134.07(12) | C36  | C39  | C11  | C21  | -0.1(15)    |
| C7  | N2   | C35  | C4   | -51.88(17) | C42  | C18  | C16  | C4   | 2.2(2)      |
| C31 | C36  | C39  | C11  | -0.7(15)   | C40  | C49  | C32  | C47  | -179.20(14) |
| C31 | C10  | C21  | C11  | 0.6(16)    | C34  | C33  | C49  | C40  | 178.54(11)  |
| C31 | C36A | C39A | C11A | 1(3)       | C34  | C33  | C49  | C32  | -2.17(18)   |
| C31 | C10A | C21A | C11A | -1(3)      | C34  | C8   | C47  | C32  | -0.8(3)     |
| C33 | N27  | C7   | O13  | -17.25(15) | C18  | C16  | C4   | C35  | -0.3(2)     |
| C33 | N27  | C7   | N2   | 167.03(11) | C20  | O13  | C7   | N27  | 84.53(11)   |
| C33 | N27  | C29  | C31  | 99.54(12)  | C20  | O13  | C7   | N2   | -99.91(13)  |
| C33 | C49  | C40  | C20  | 69.16(15)  | C4   | C35  | C9   | C42  | 3.94(18)    |
| C33 | C49  | C32  | C47  | 1.5(2)     | C10  | C31  | C29  | N27  | 178.7(5)    |
| C33 | C34  | C8   | C47  | 0.2(2)     | C10  | C31  | C36  | C39  | 1.3(13)     |
| C29 | N27  | C7   | O13  | 163.14(9)  | C30  | C18  | C16  | C4   | -176.75(13) |
| C29 | N27  | C7   | N2   | -12.58(16) | C32  | C49  | C40  | C20  | -110.11(14) |
| C29 | N27  | C33  | C49  | 140.94(11) | C39  | C11  | C21  | C10  | 0.1(16)     |
| C29 | N27  | C33  | C34  | -36.40(15) | C36A | C31  | C29  | N27  | -3.8(10)    |
| C29 | C31  | C36  | C39  | -179.6(7)  | C36A | C31  | C10A | C21A | 1(2)        |
| C29 | C31  | C10  | C21  | 179.5(8)   | C10A | C31  | C29  | N27  | 178.1(10)   |
| C29 | C31  | C36A | C39A | -179.1(14) | C10A | C31  | C36A | C39A | -1(2)       |
| C29 | C31  | C10A | C21A | 178.6(12)  | C10A | C21A | C11A | C39A | 1(2)        |
| C35 | N2   | C7   | O13  | -0.08(17)  | C21A | C11A | C39A | C36A | -1(2)       |
| C35 | N2   | C7   | N27  | 175.20(10) |      |      |      |      |             |

**Table 7 Hydrogen Atom Coordinates ( $\text{\AA}\times 10^4$ ) and Isotropic Displacement Parameters ( $\text{\AA}^2\times 10^3$ ) for 2u.**

| Atom | <i>x</i> | <i>y</i> | <i>z</i> | U(eq) |
|------|----------|----------|----------|-------|
| H29A | 2170.99  | -789.71  | 1796.16  | 55    |
| H29B | 1847.48  | -348.47  | 3156.48  | 55    |
| H9   | 133.53   | 1668.35  | 6034.29  | 61    |
| H36  | 5546.31  | 2265.55  | 3487.83  | 62    |
| H42  | 54.47    | 3227.27  | 7957.79  | 63    |
| H40A | -138.84  | 1731.53  | 2295.87  | 67    |
| H40B | -263.25  | 2716.98  | 1648.77  | 67    |
| H34  | 3940.46  | 519.51   | 811.06   | 67    |
| H16  | 4236.86  | 6162.5   | 7988.35  | 76    |
| H4   | 4268.85  | 4625.69  | 6032.63  | 70    |
| H10  | 3305.45  | -1924.11 | 2901.76  | 58    |
| H32  | 829.23   | 2544.54  | -173.61  | 83    |
| H8   | 3860.58  | 725.65   | -1067.83 | 85    |
| H14A | 2964.38  | 5935.73  | 3768.37  | 111   |
| H14B | 1469.81  | 5459.54  | 2796.25  | 111   |
| H14C | 2851.49  | 5031.25  | 2353.42  | 111   |
| H39  | 7898.99  | 2244.21  | 4146.96  | 74    |
| H11  | 7953.86  | 190.48   | 4186.9   | 73    |
| H47  | 2324.91  | 1757.73  | -1549.09 | 96    |
| H21  | 5672.48  | -1886.3  | 3567.99  | 74    |
| H36A | 5147.12  | 2200.84  | 3266.46  | 76    |
| H10A | 3792.25  | -1729.62 | 3070.75  | 78    |
| H21A | 6281.73  | -1314.33 | 3750.69  | 87    |

**Table 7 Hydrogen Atom Coordinates ( $\text{\AA}\times 10^4$ ) and Isotropic Displacement Parameters ( $\text{\AA}^2\times 10^3$ ) for 2u.**

| <b>Atom</b> | <b>x</b> | <b>y</b> | <b>z</b> | <b>U(eq)</b> |
|-------------|----------|----------|----------|--------------|
| H11A        | 8300.75  | 899.15   | 4191.79  | 91           |
| H39A        | 7739.2   | 2694.14  | 3991.6   | 86           |

**Table 8 Atomic Occupancy for 2u.**

| <b>Atom Occupancy</b> |         | <b>Atom Occupancy</b> |         | <b>Atom Occupancy</b> |         |
|-----------------------|---------|-----------------------|---------|-----------------------|---------|
| C36                   | 0.61(2) | H36                   | 0.61(2) | C10                   | 0.61(2) |
| H10                   | 0.61(2) | C39                   | 0.61(2) | H39                   | 0.61(2) |
| C11                   | 0.61(2) | H11                   | 0.61(2) | C21                   | 0.61(2) |
| H21                   | 0.61(2) | C36A                  | 0.39(2) | H36A                  | 0.39(2) |
| C10A                  | 0.39(2) | H10A                  | 0.39(2) | C21A                  | 0.39(2) |
| H21A                  | 0.39(2) | C11A                  | 0.39(2) | H11A                  | 0.39(2) |
| C39A                  | 0.39(2) | H39A                  | 0.39(2) |                       |         |

#### IV. References:

1. Fayol, A.; Fang, Y.-Q.; Lautens, M. *Org. Lett.* 2006, **8**, 4203–4206.
2. Ulmer, A.; Brunner, C.; Arnold, A. M.; Pöthig, A.; Gulder, T. *Chem. Eur. J.* 2016, **22**, 3660-3664
3. Hou, Z.-W.; Yan, H.; Song, J.-S.; Xu, H.-C. *Chin. J. Chem.* 2018, **36**, 909-915.
4. Chen, C.; Huang, Y.; Ding, J.; Liu, L.; Zhu, B. *Adv. Synth. Catal.* 2022, **364**, 794-801.
5. Babu, S. S.; Varma, A. A.; Gopinath, P. *Chem. Commun.* 2022, **58**, 1990-1993.



## V. $^1\text{H}$ , $^{13}\text{C}$ and $^{19}\text{F}$ NMR Spectra of Substrates and Products:

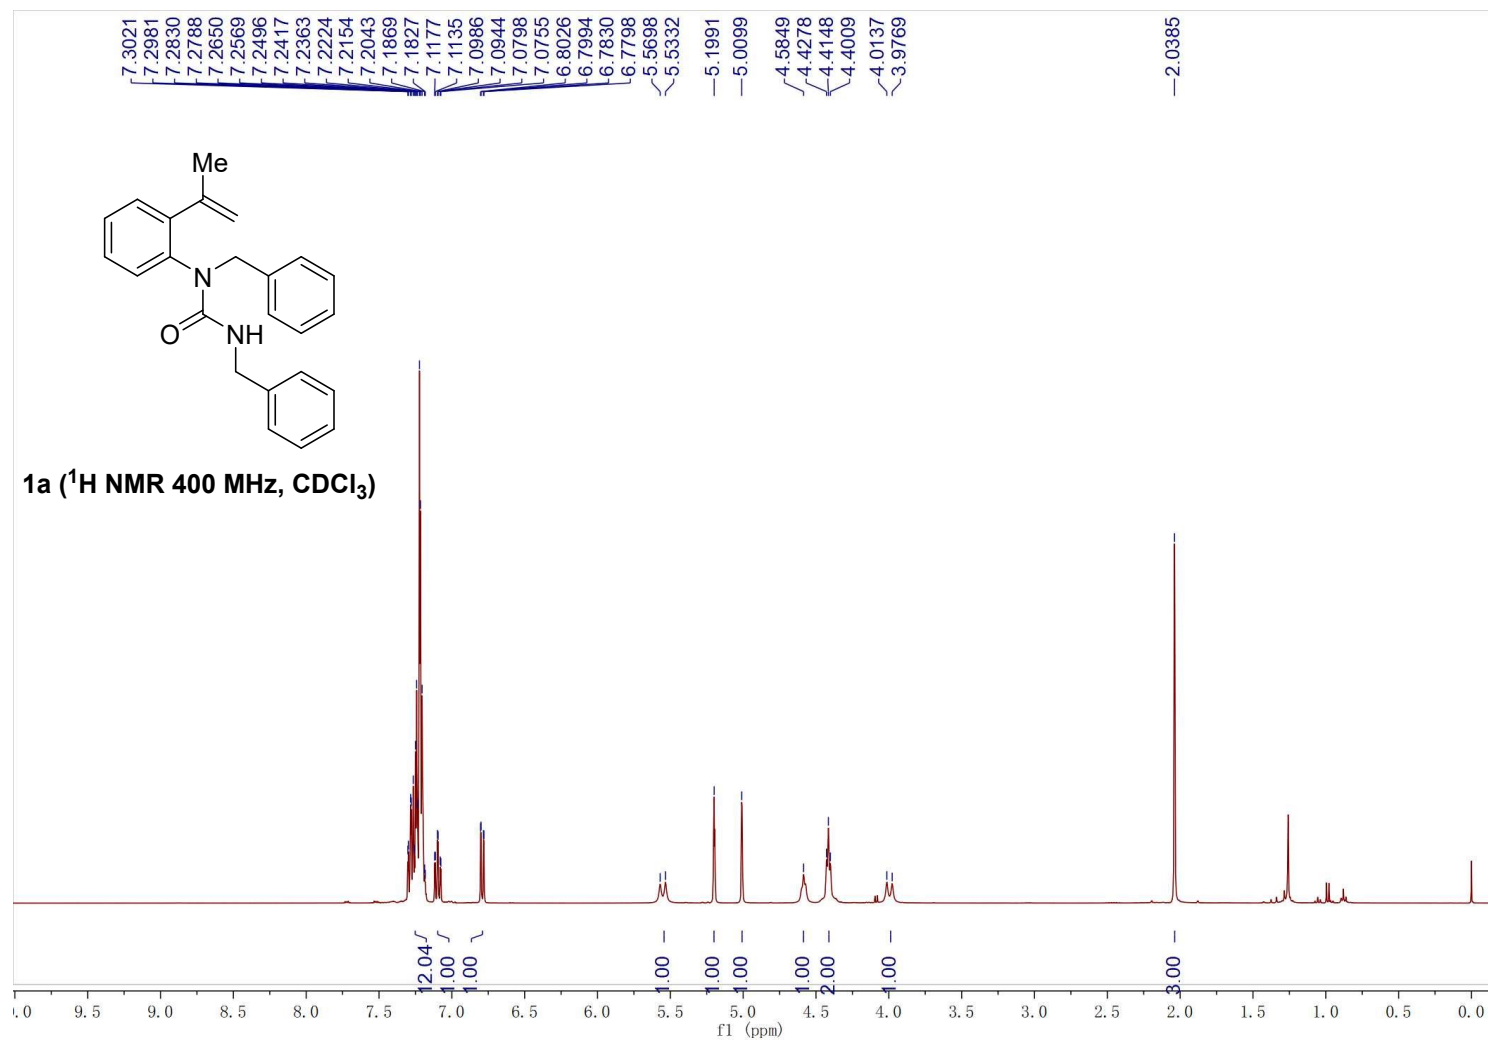

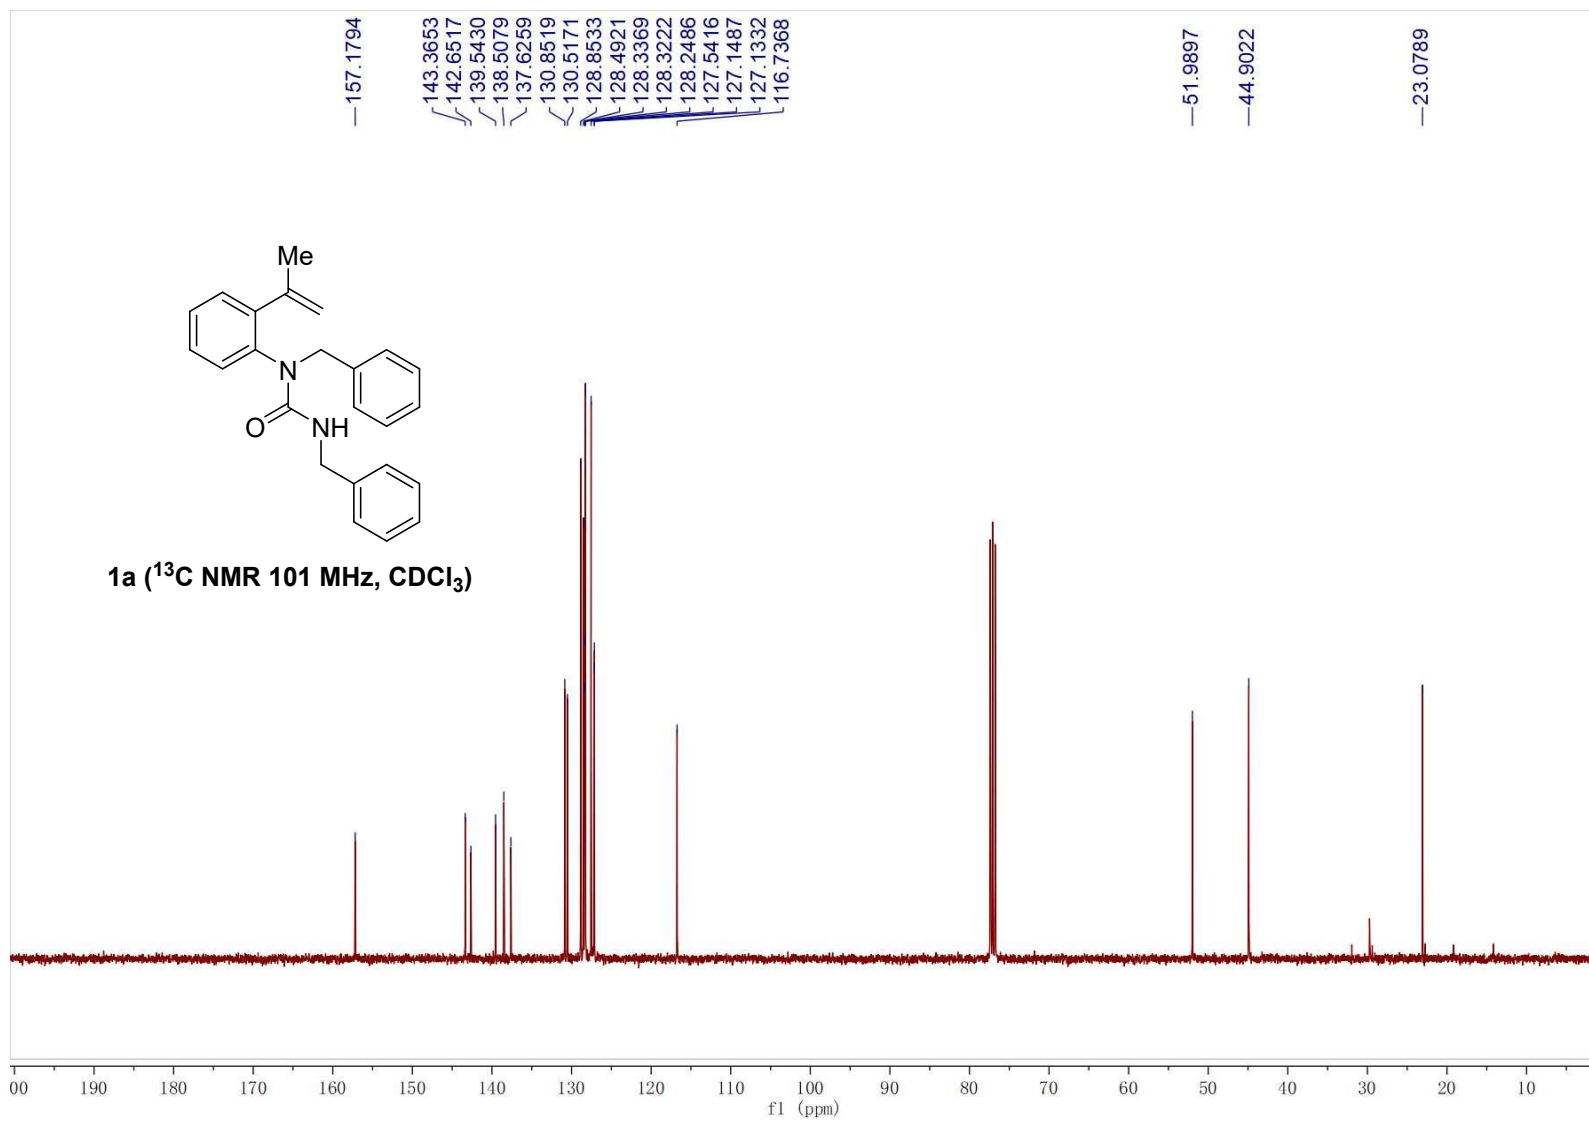

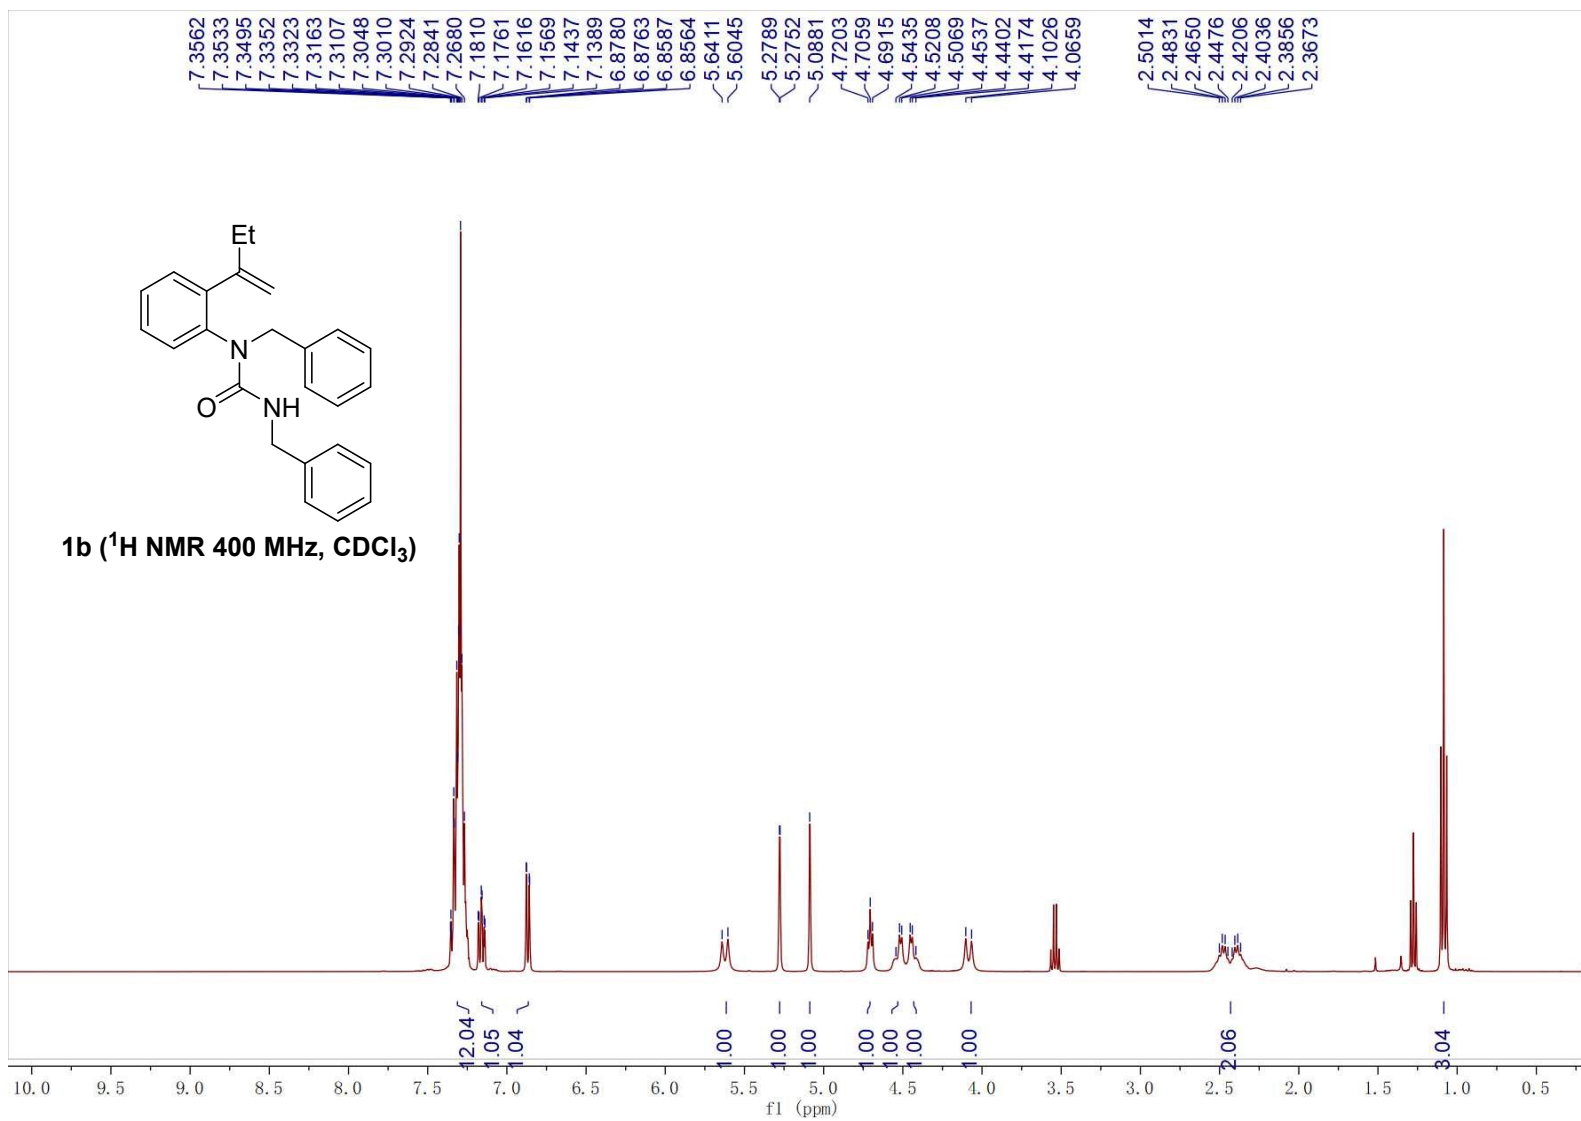

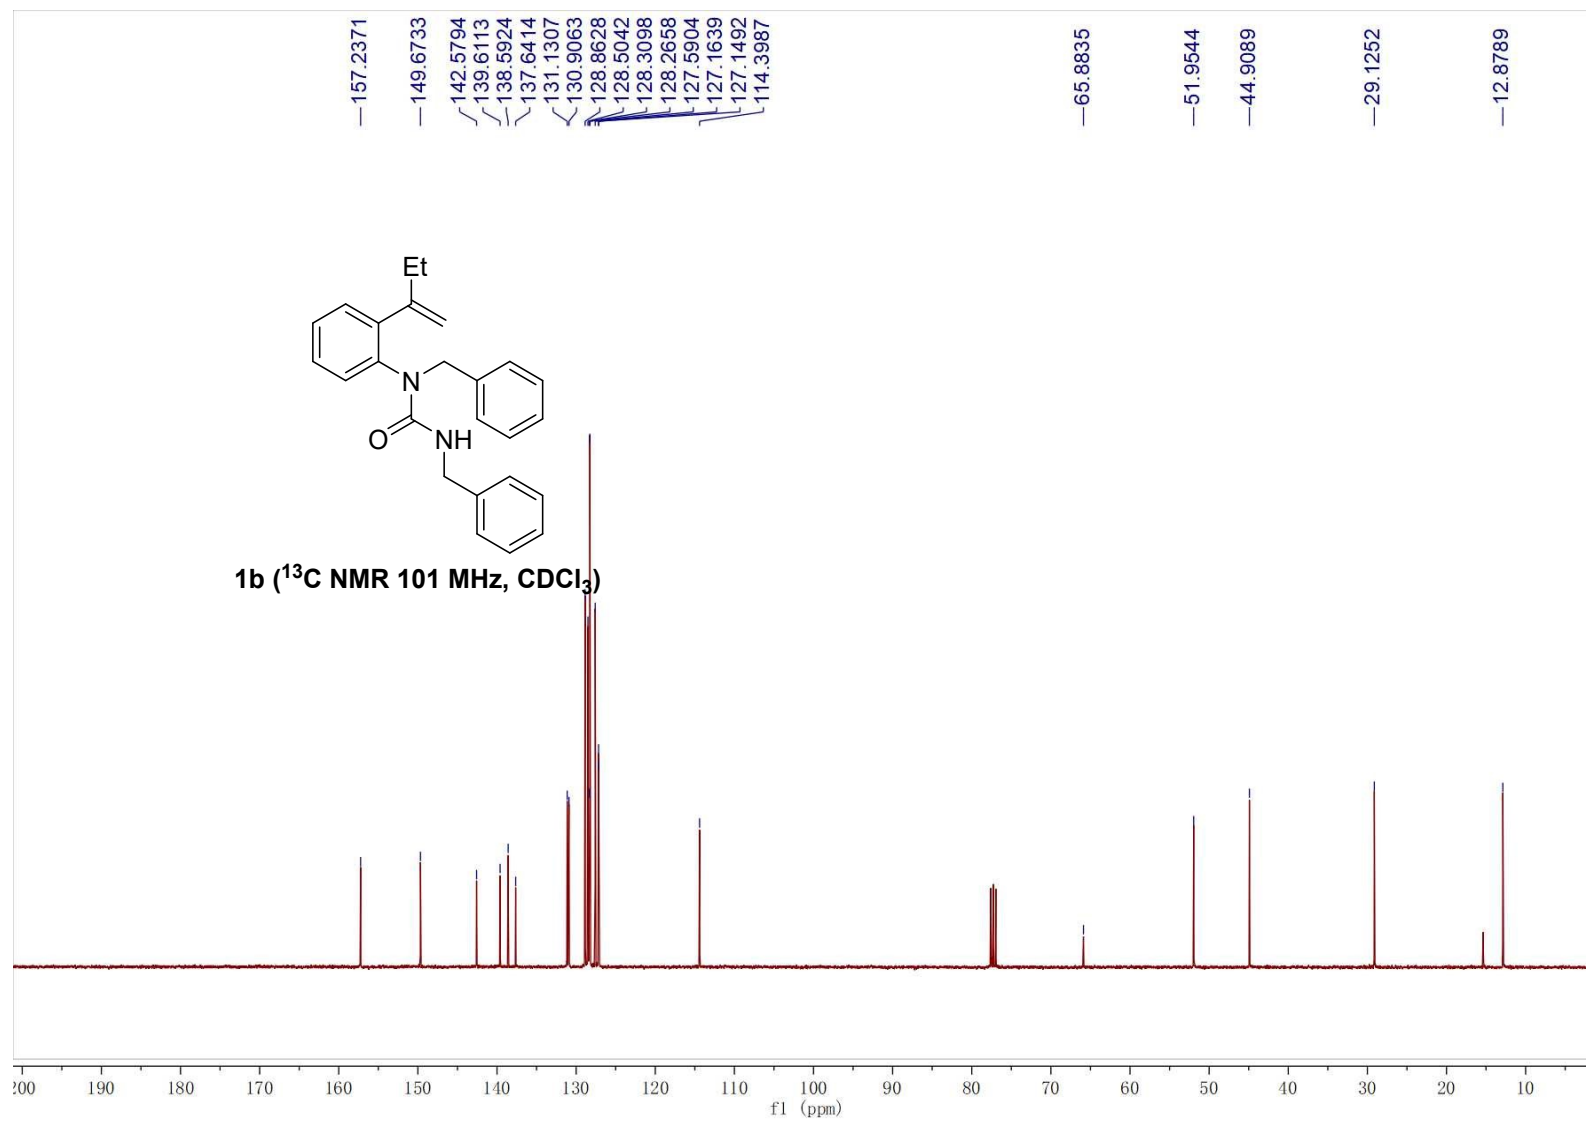

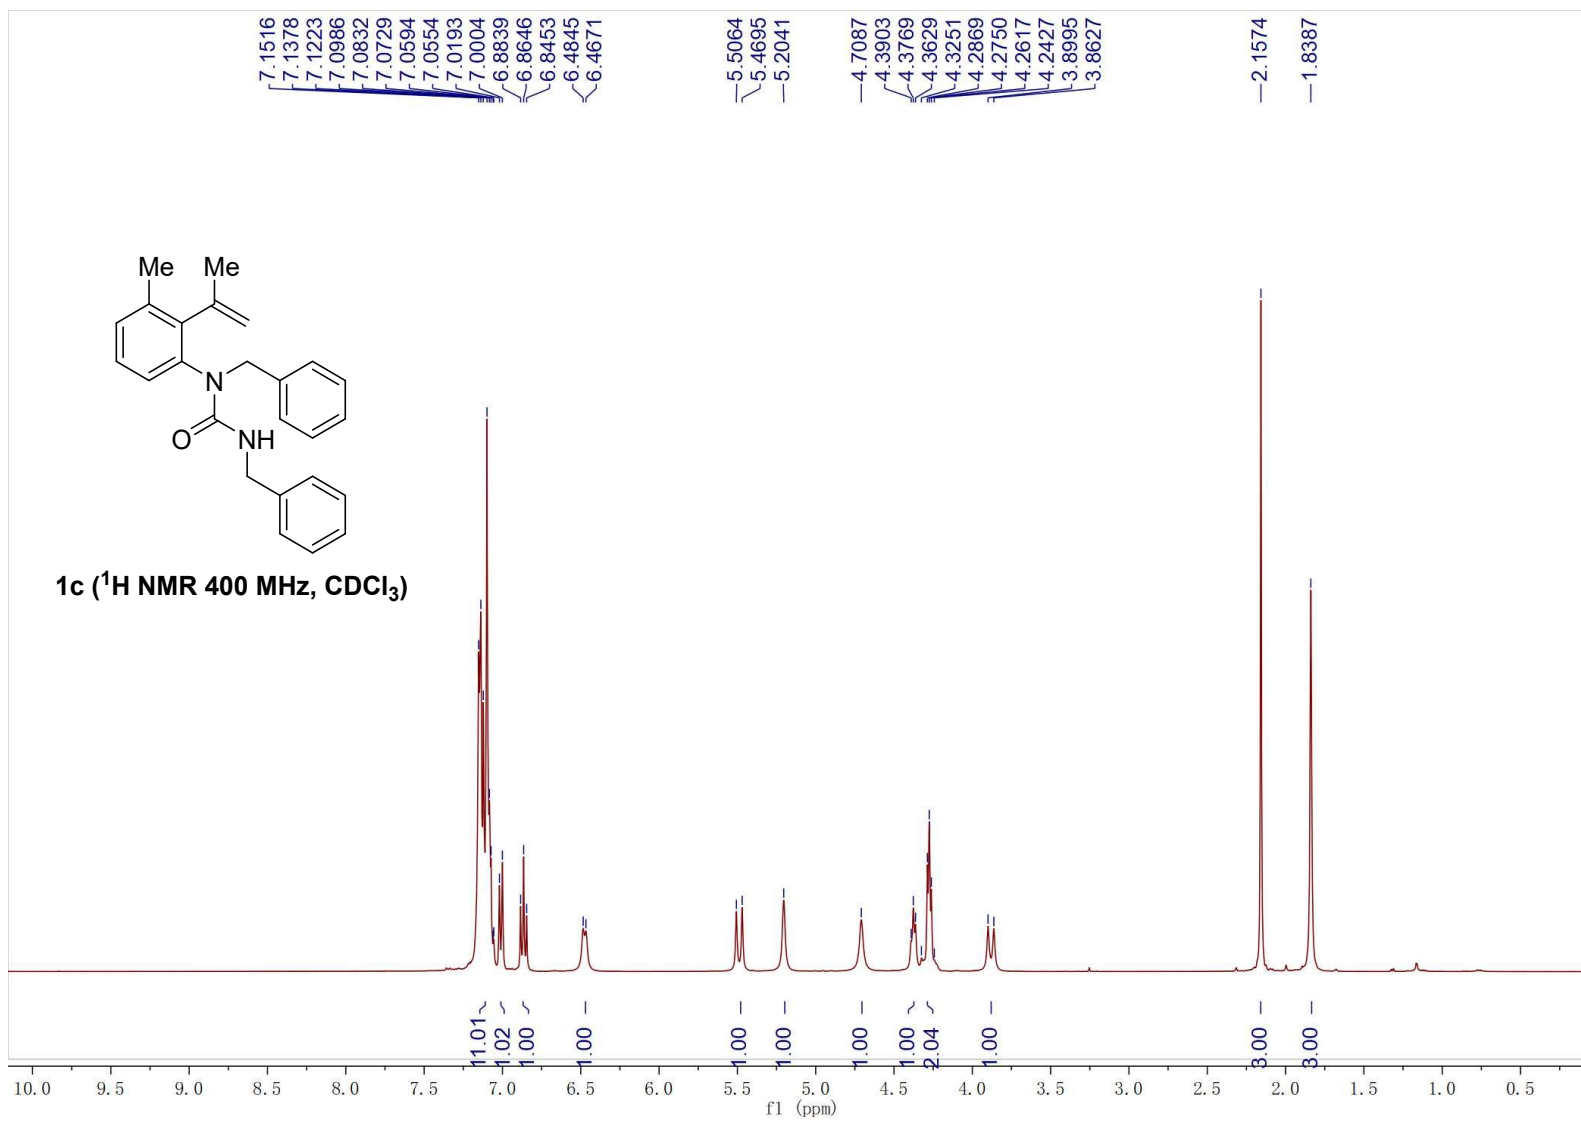

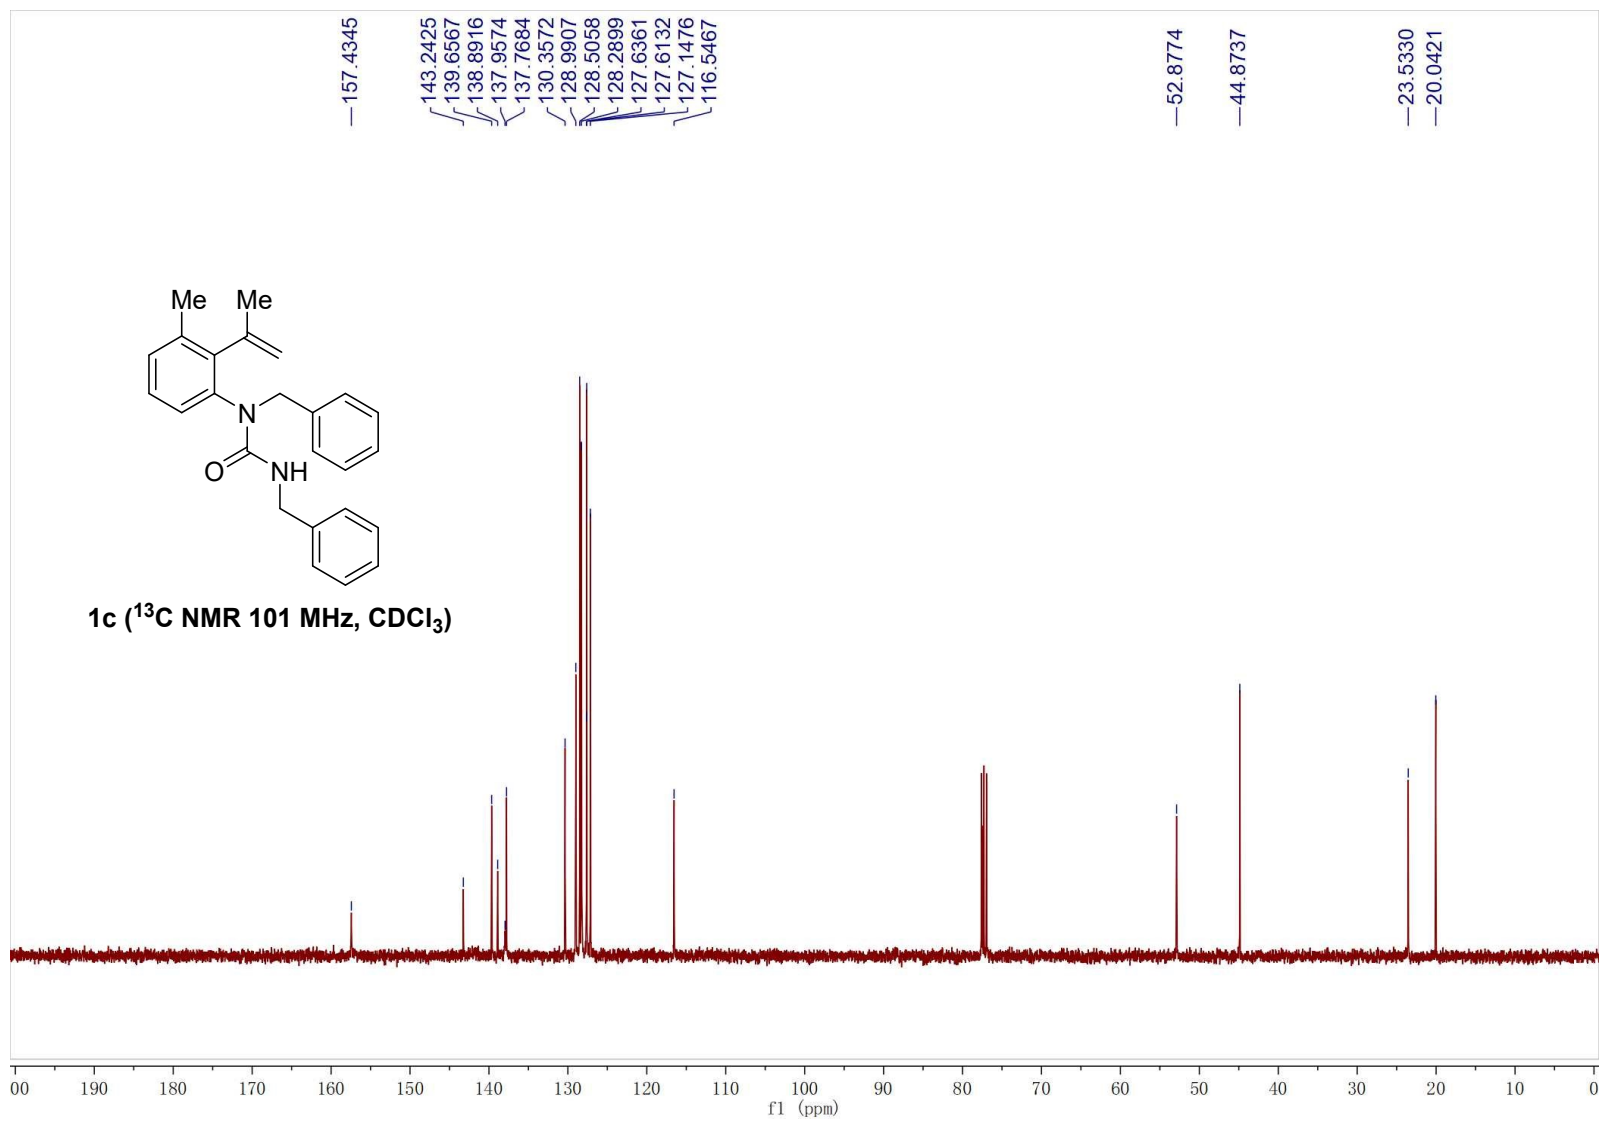

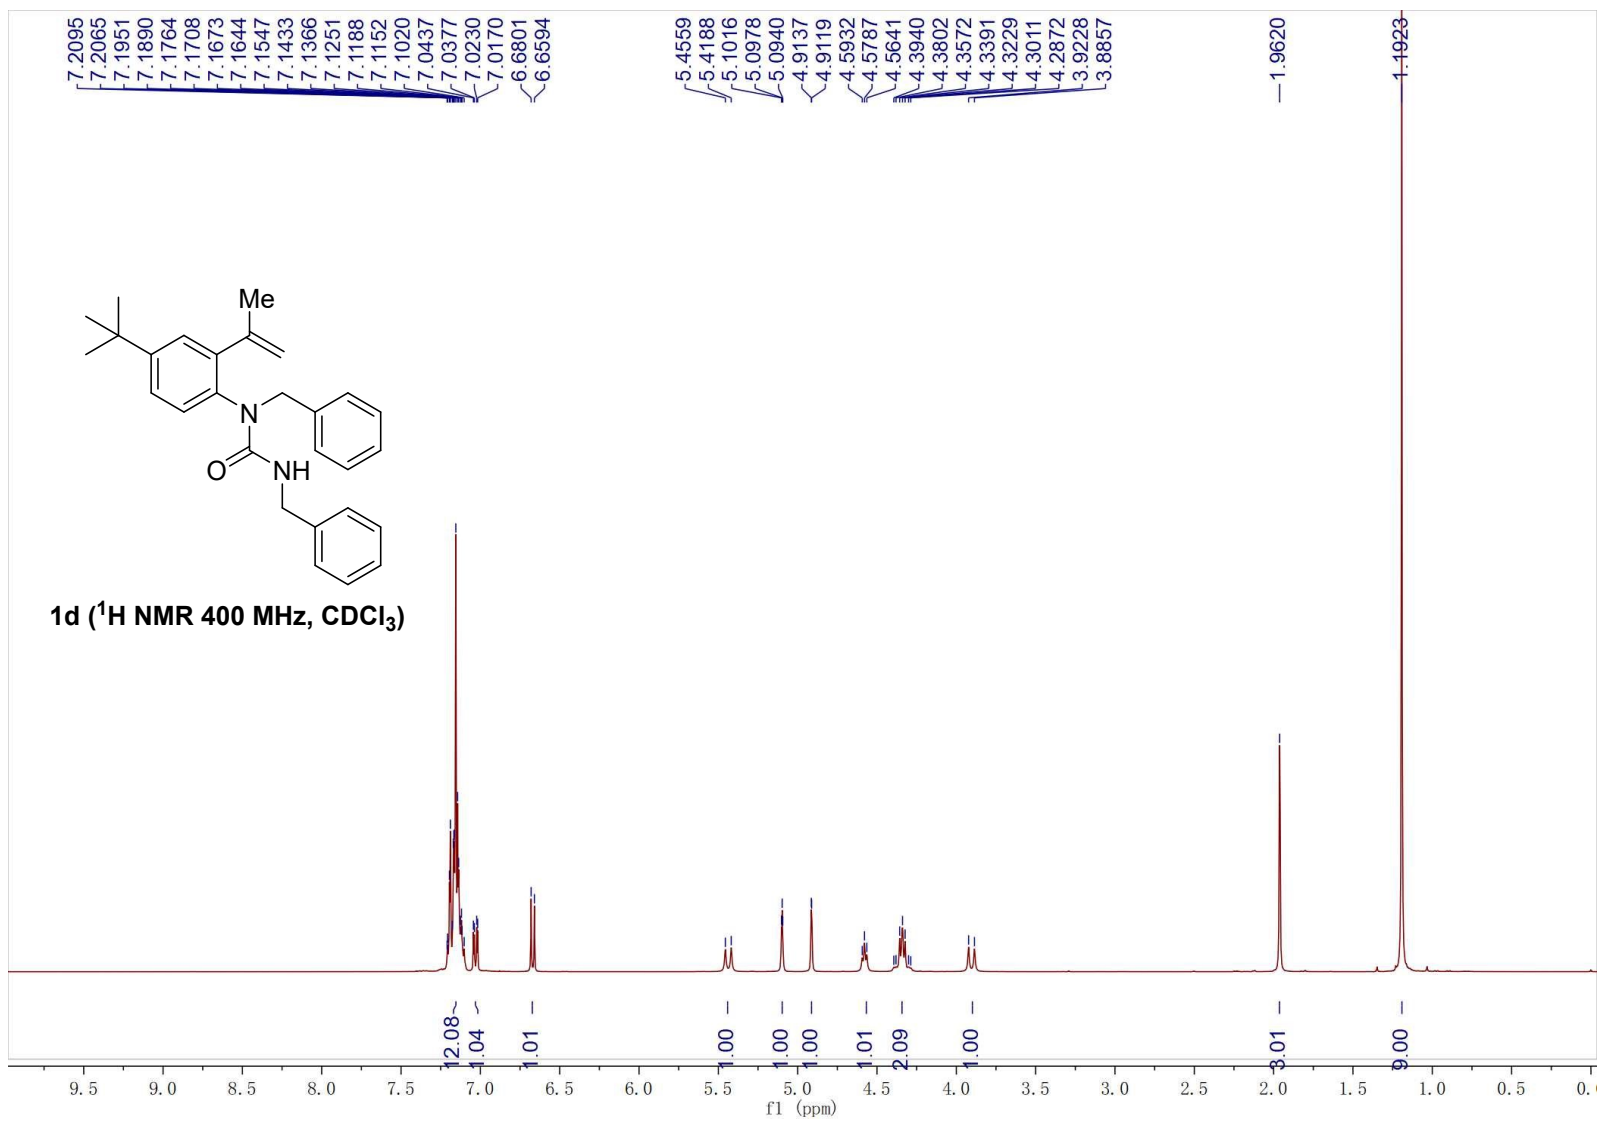

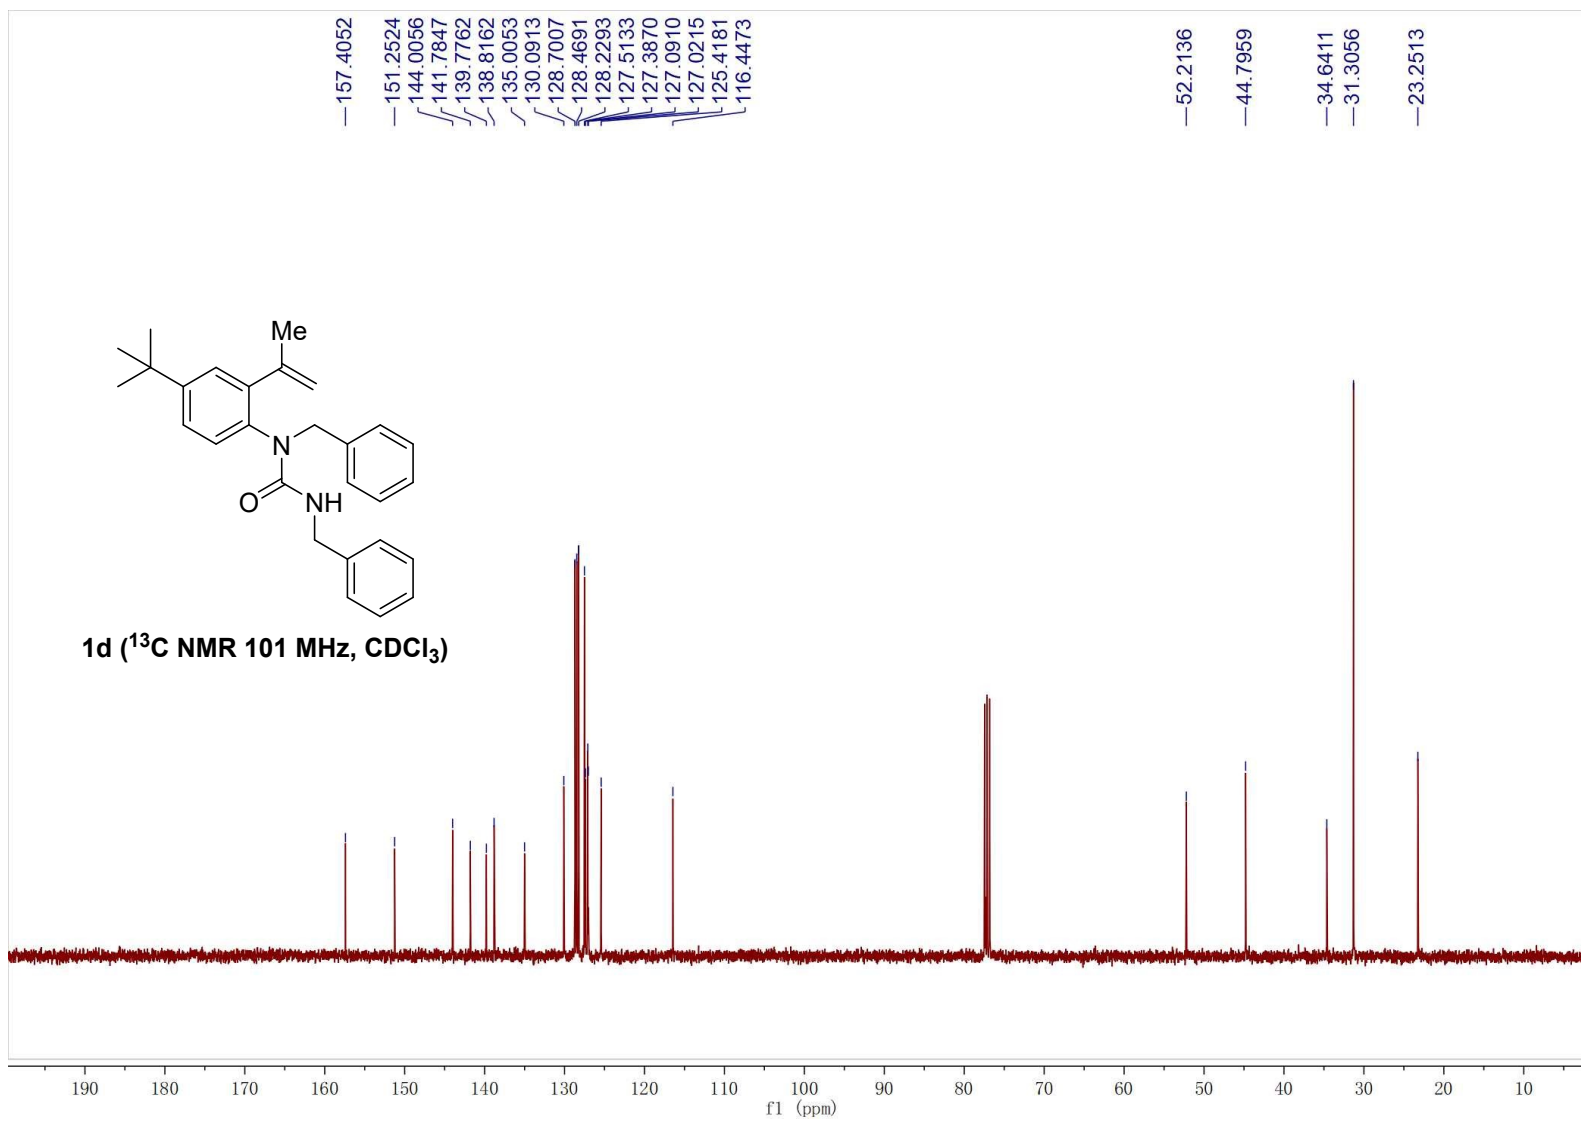



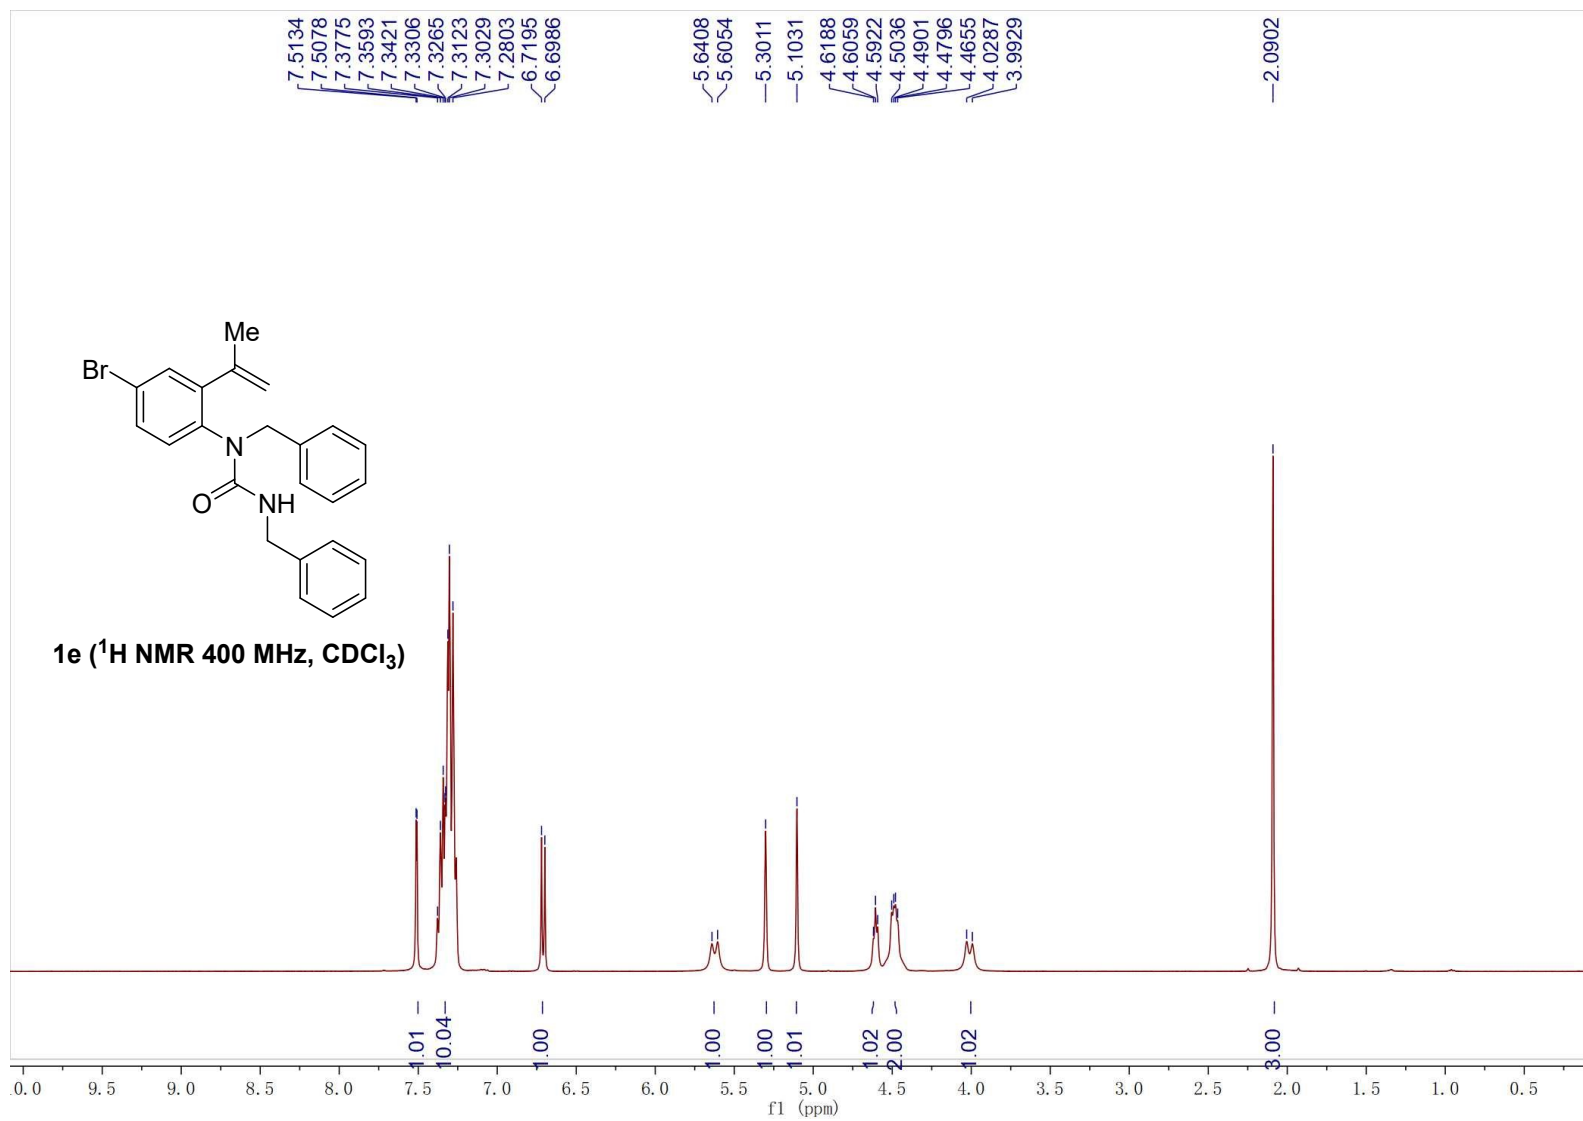

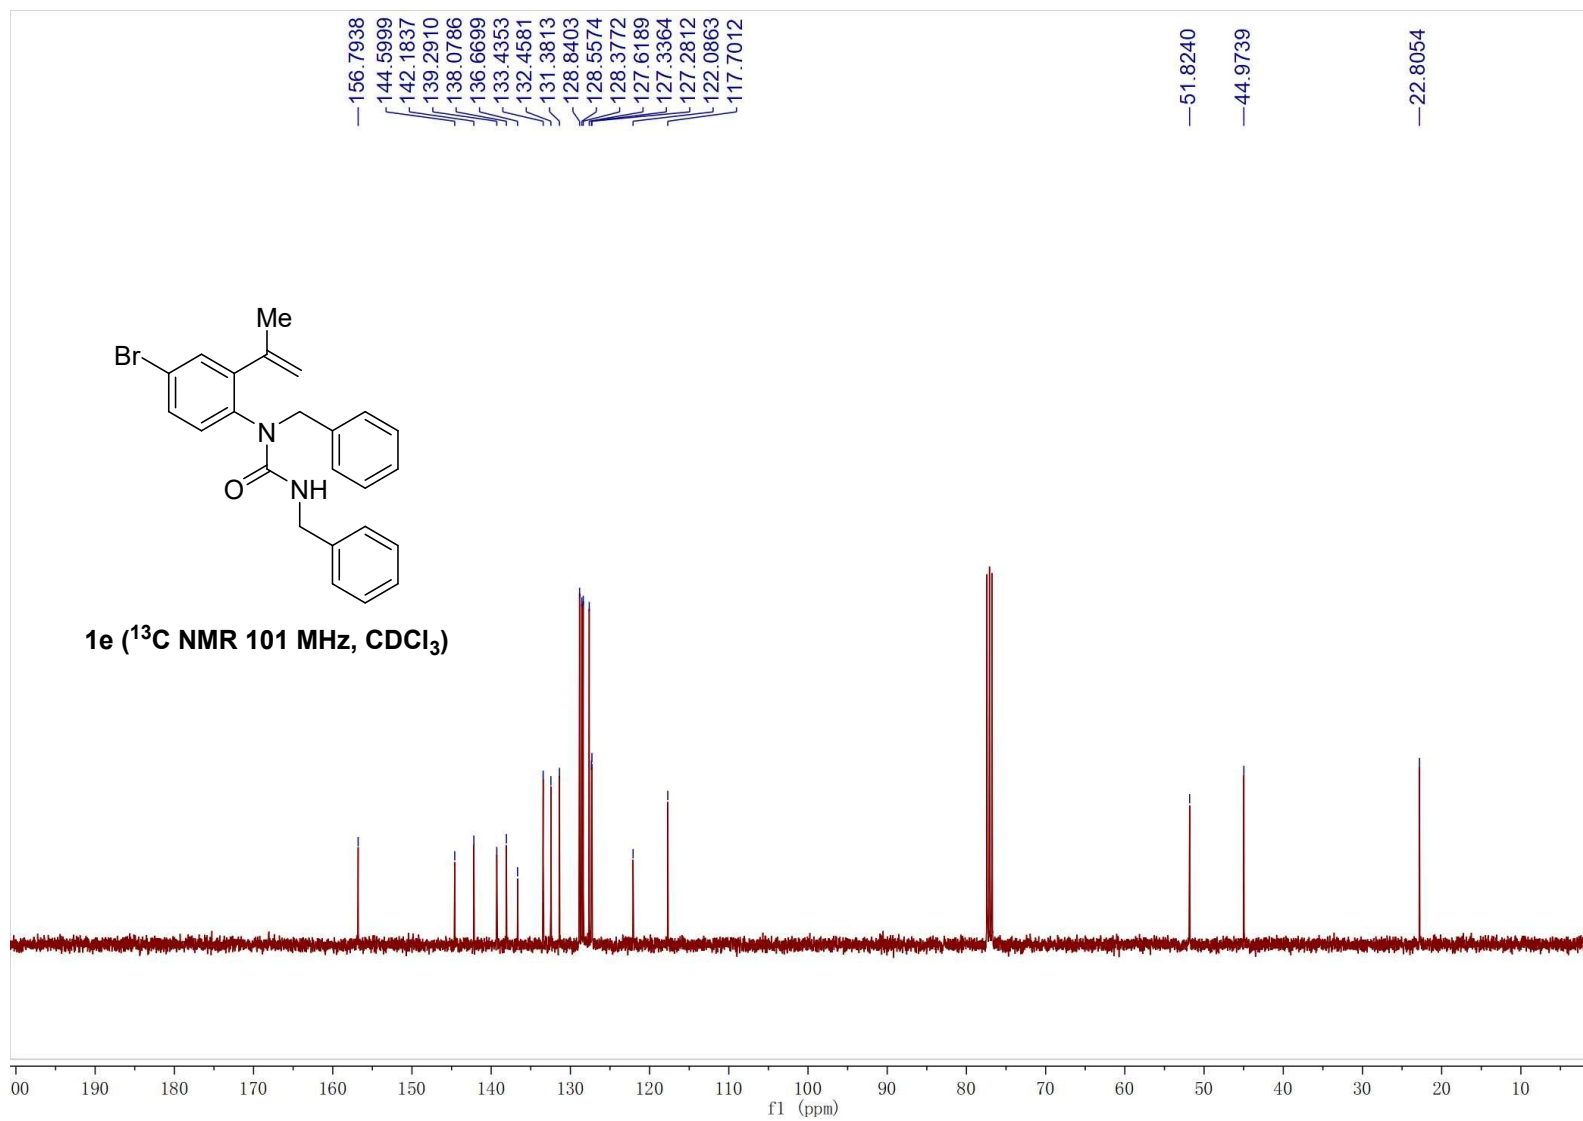

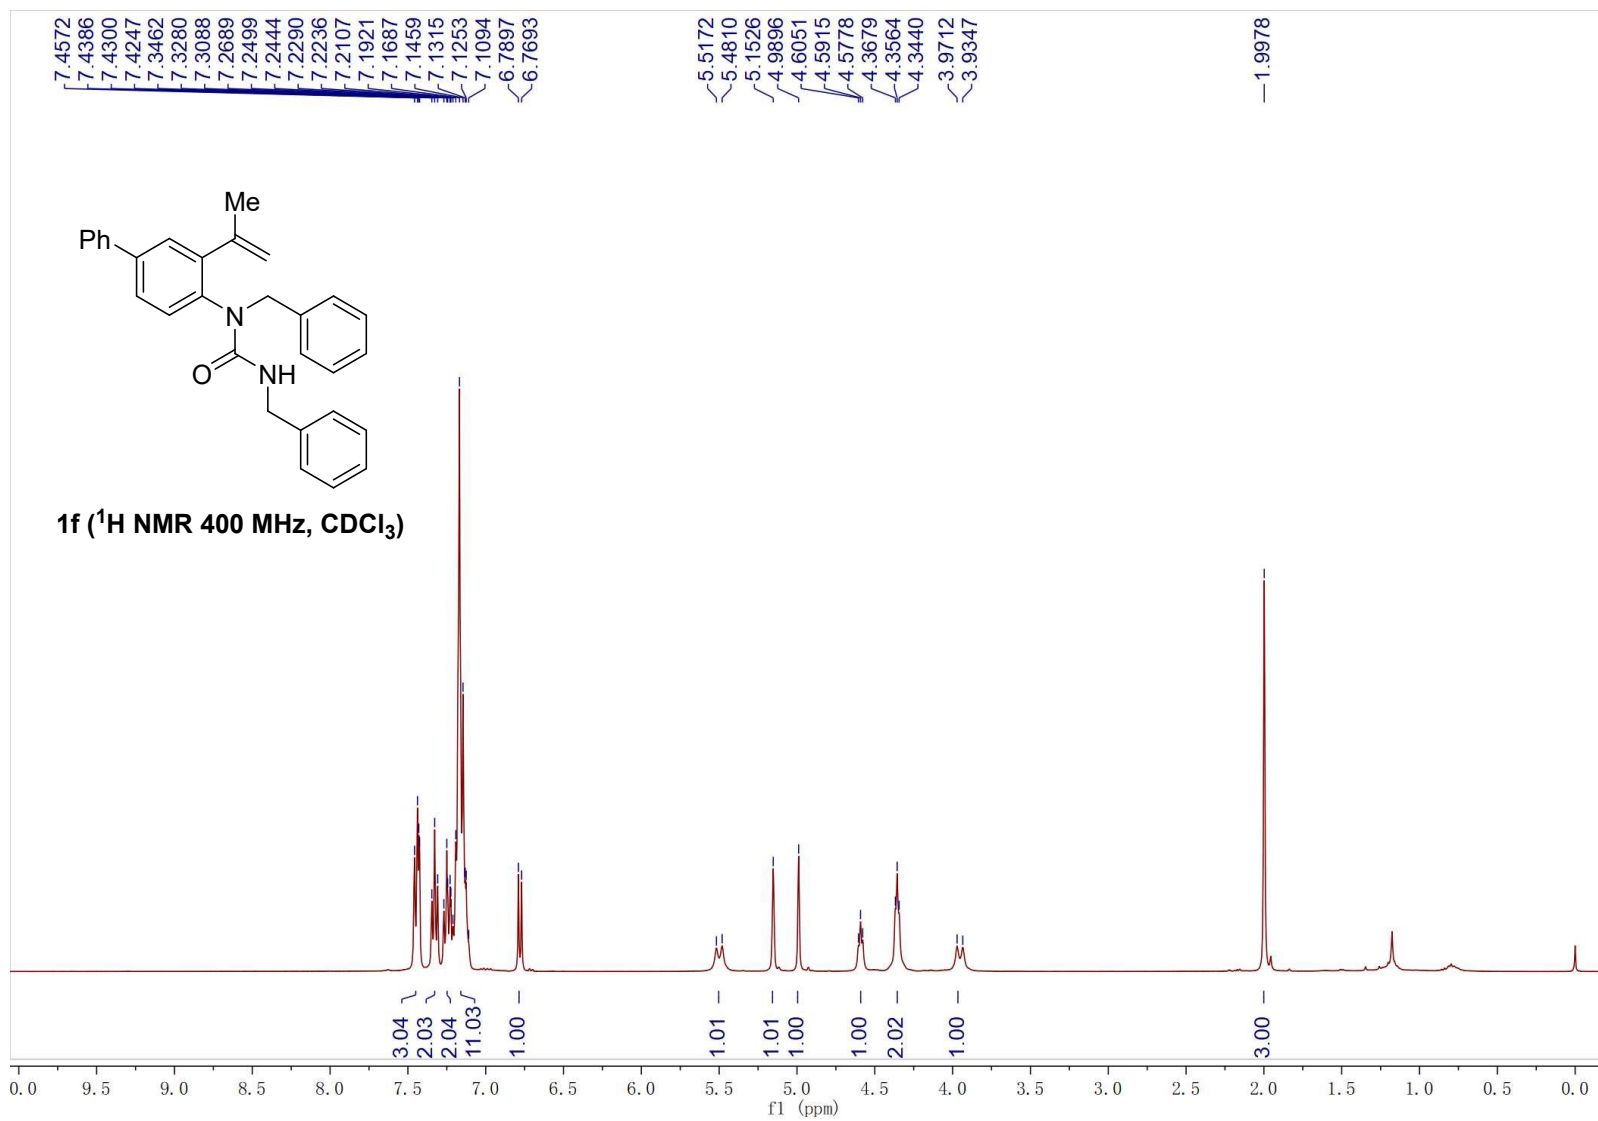

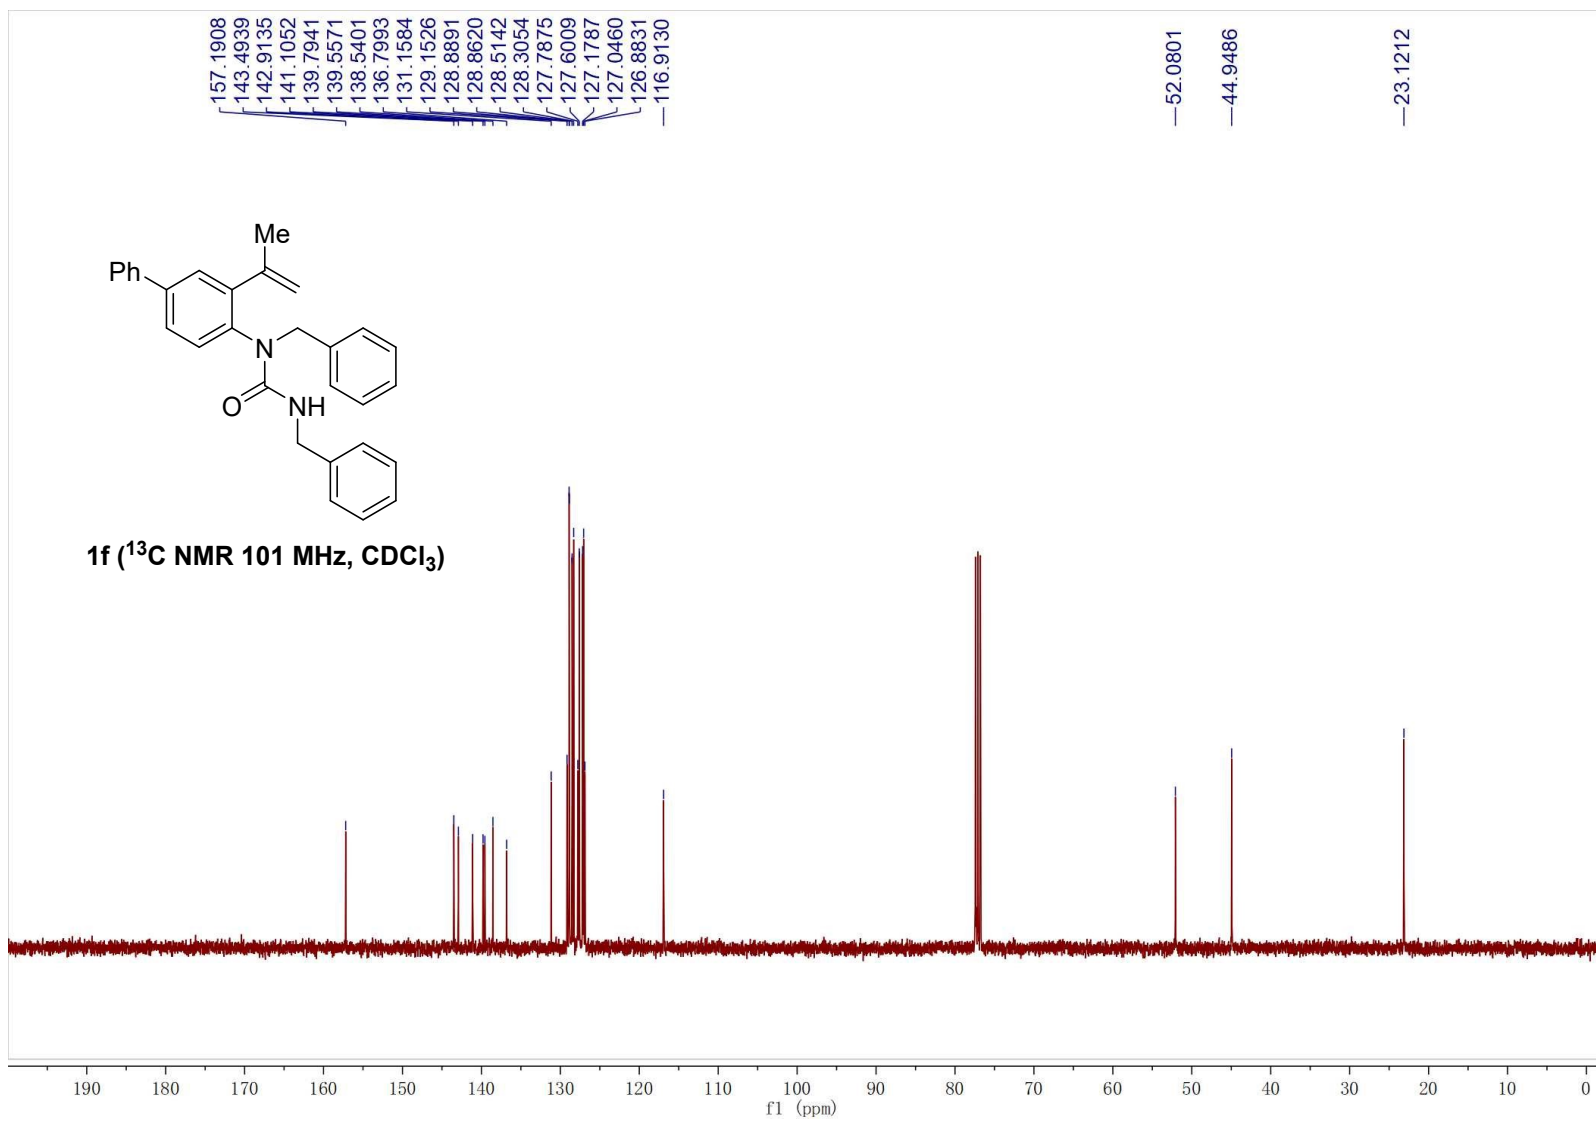

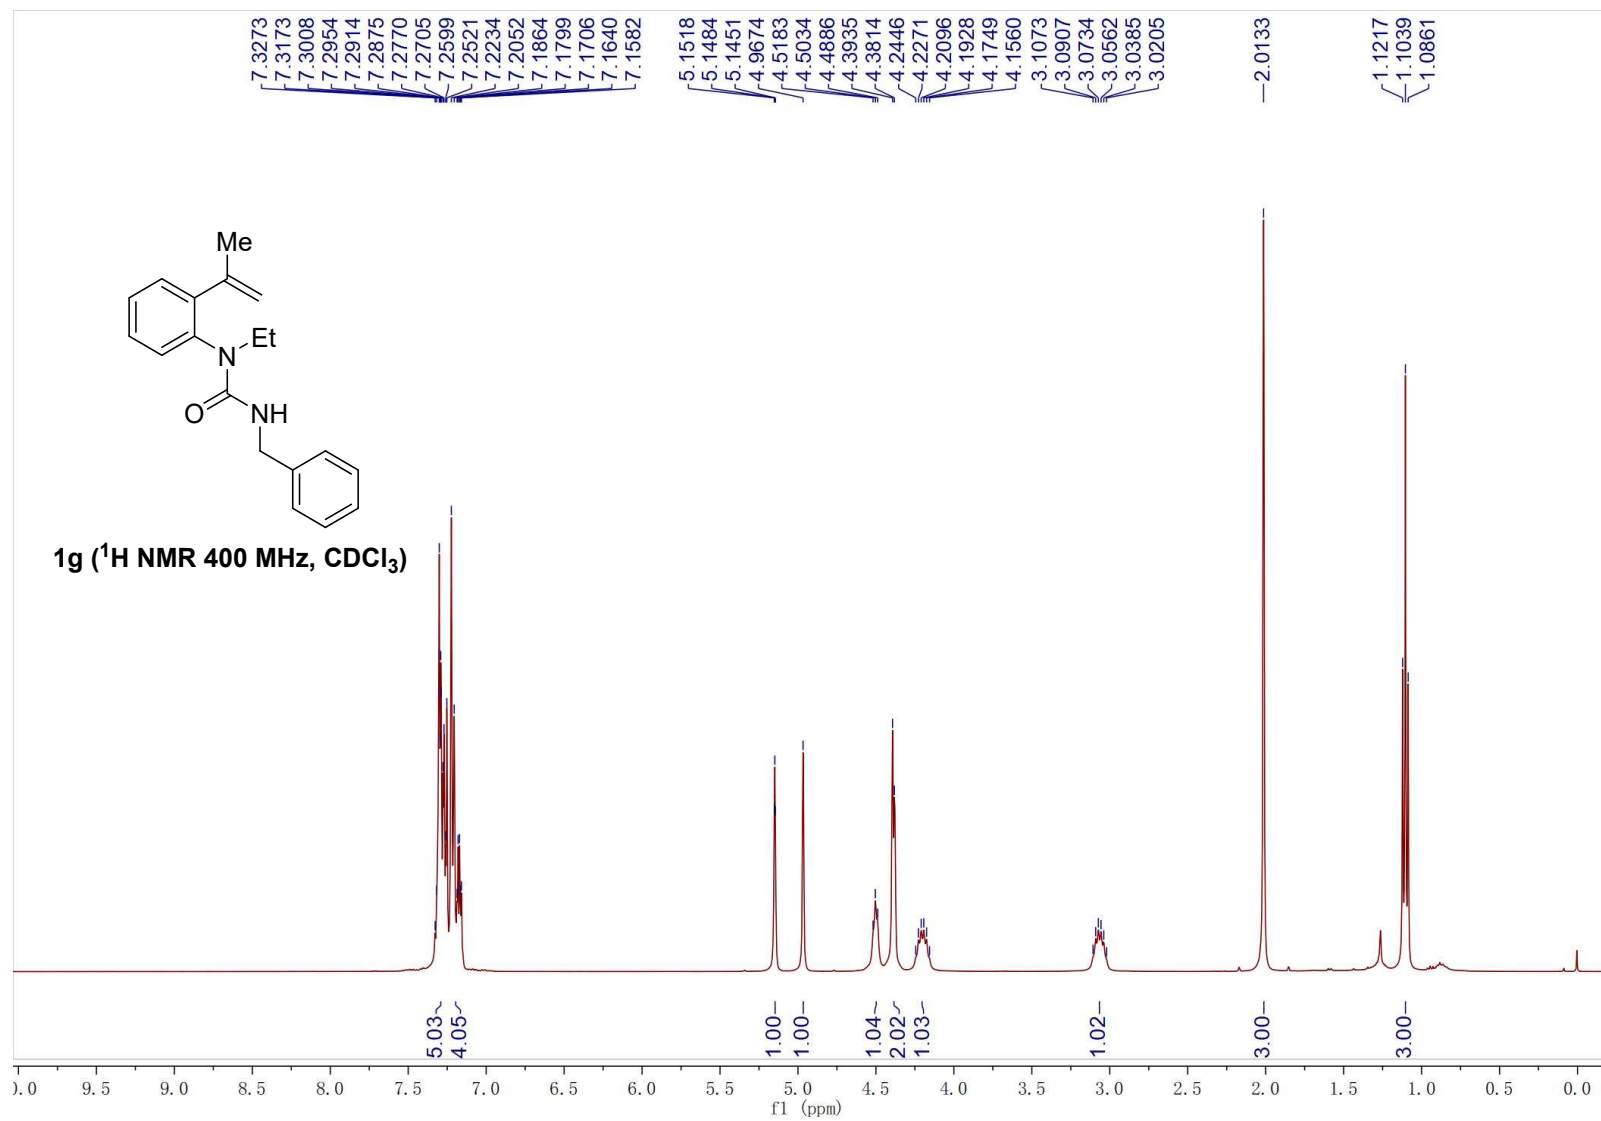

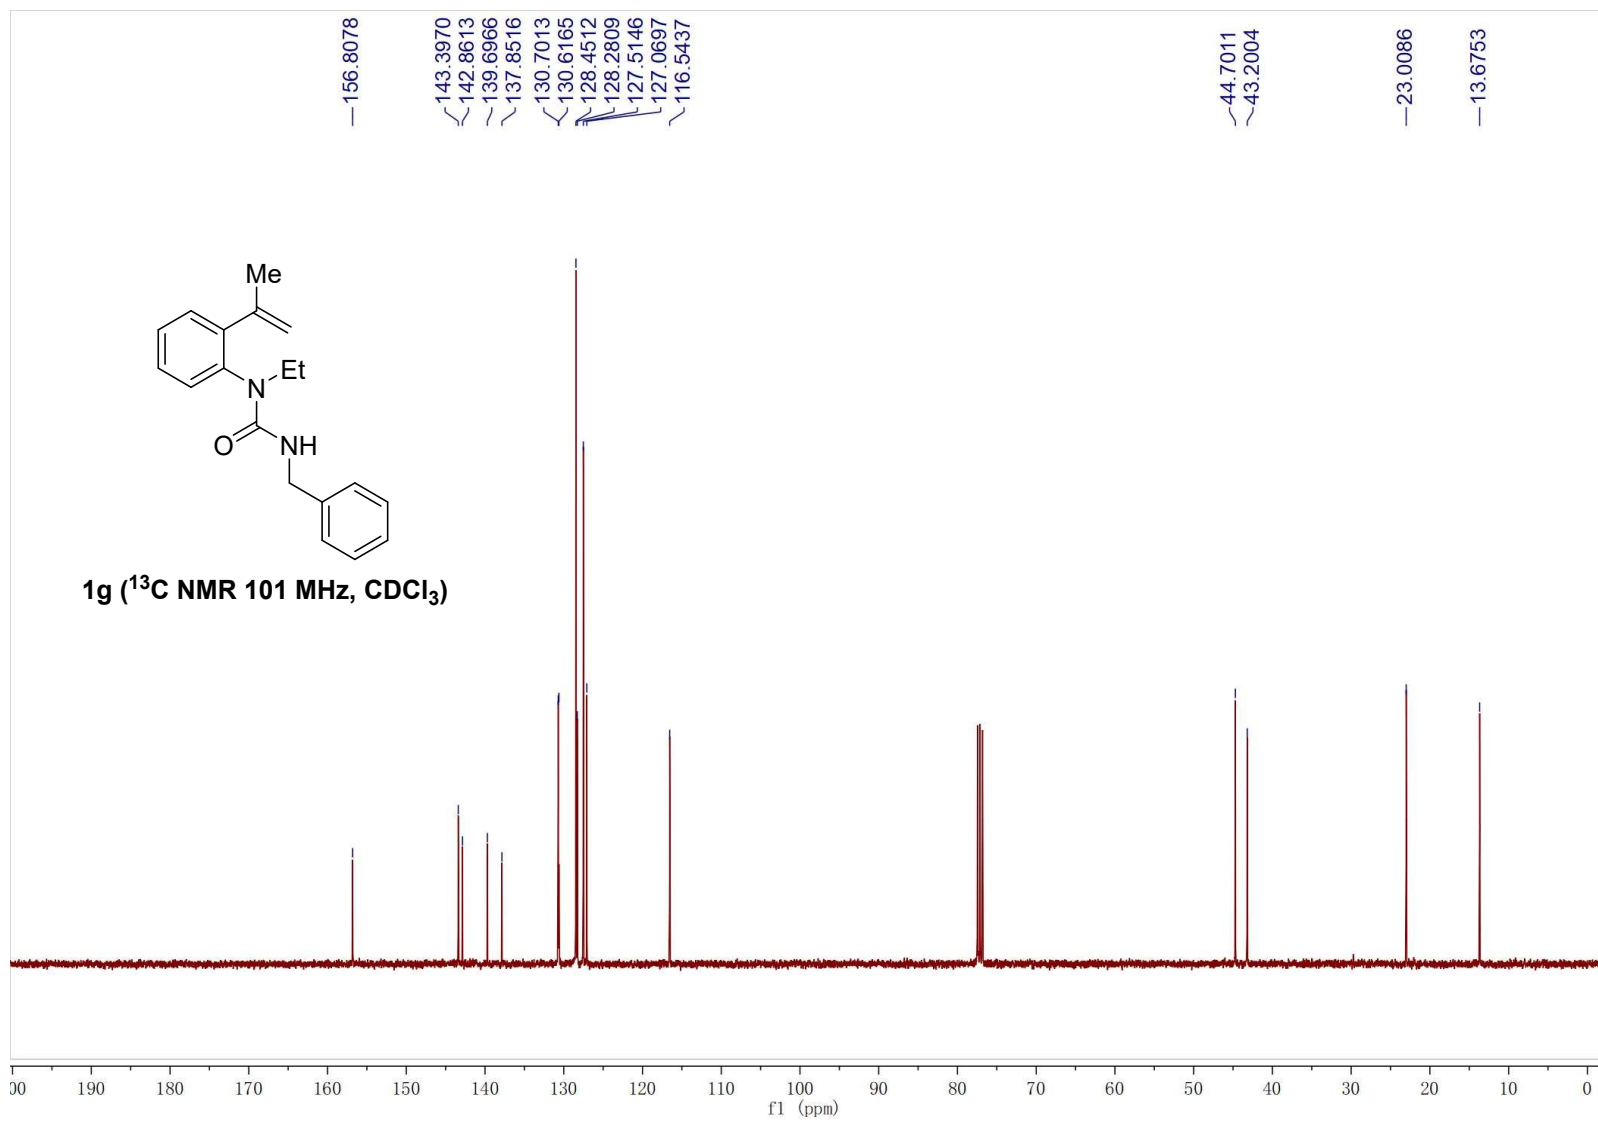

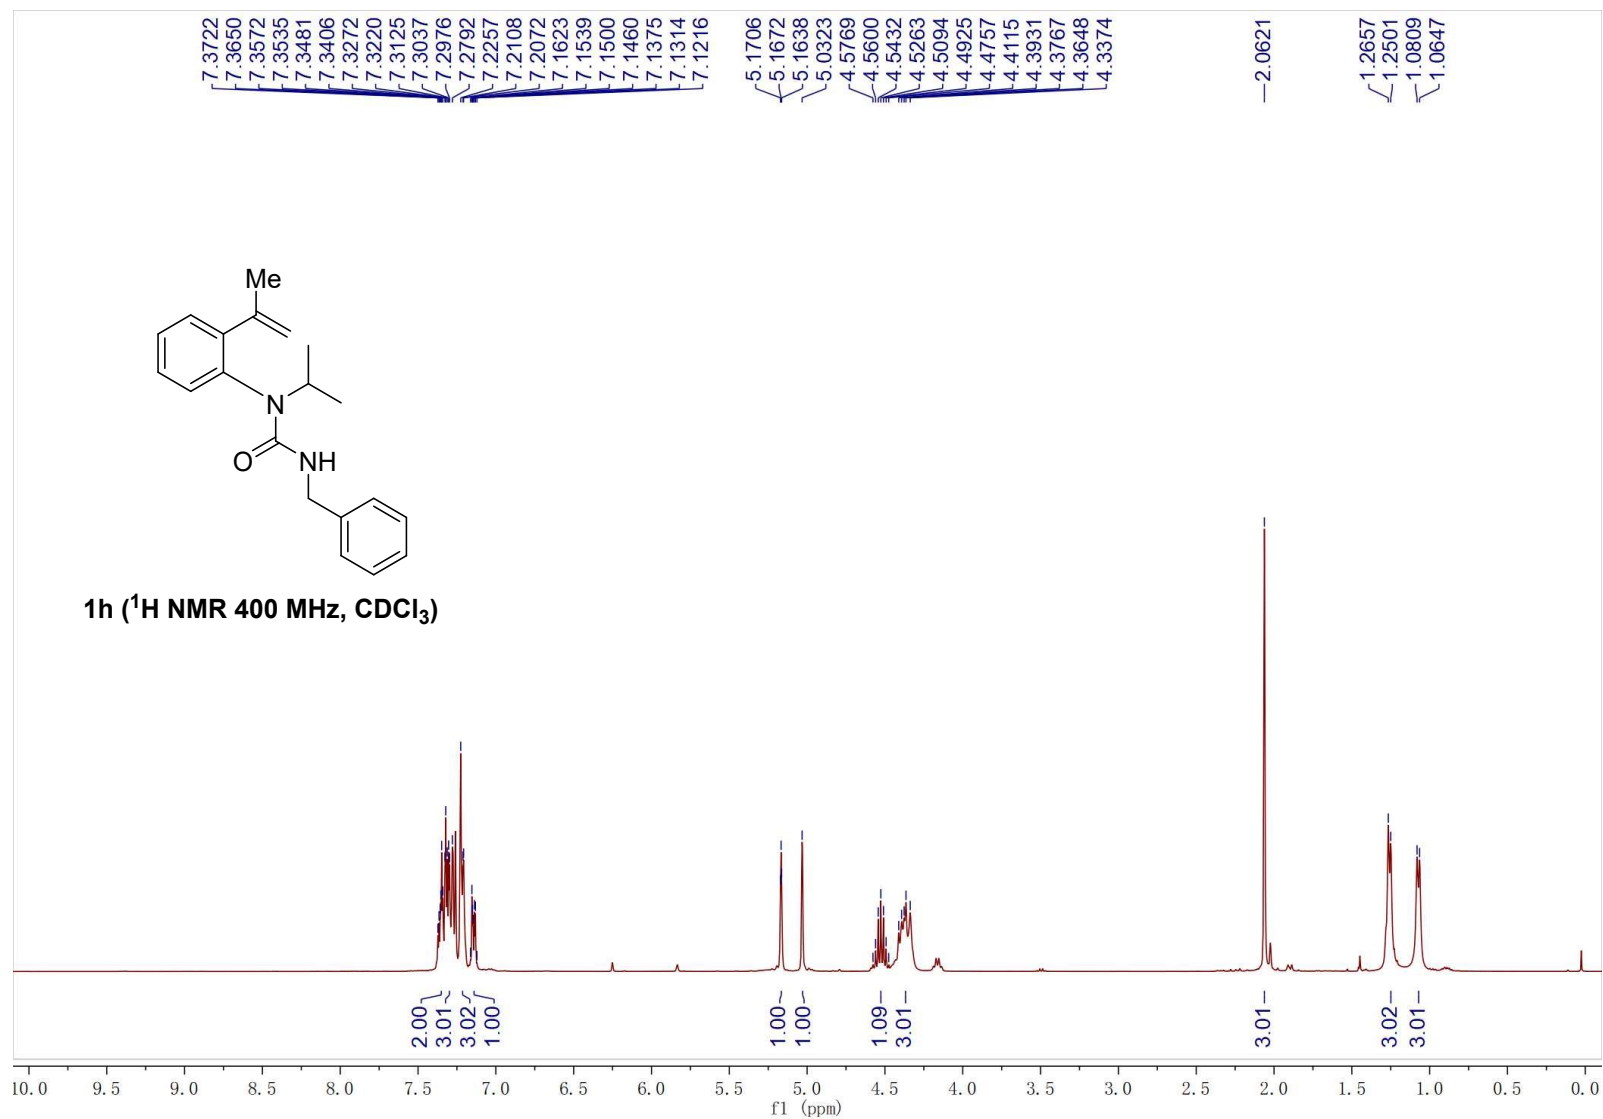

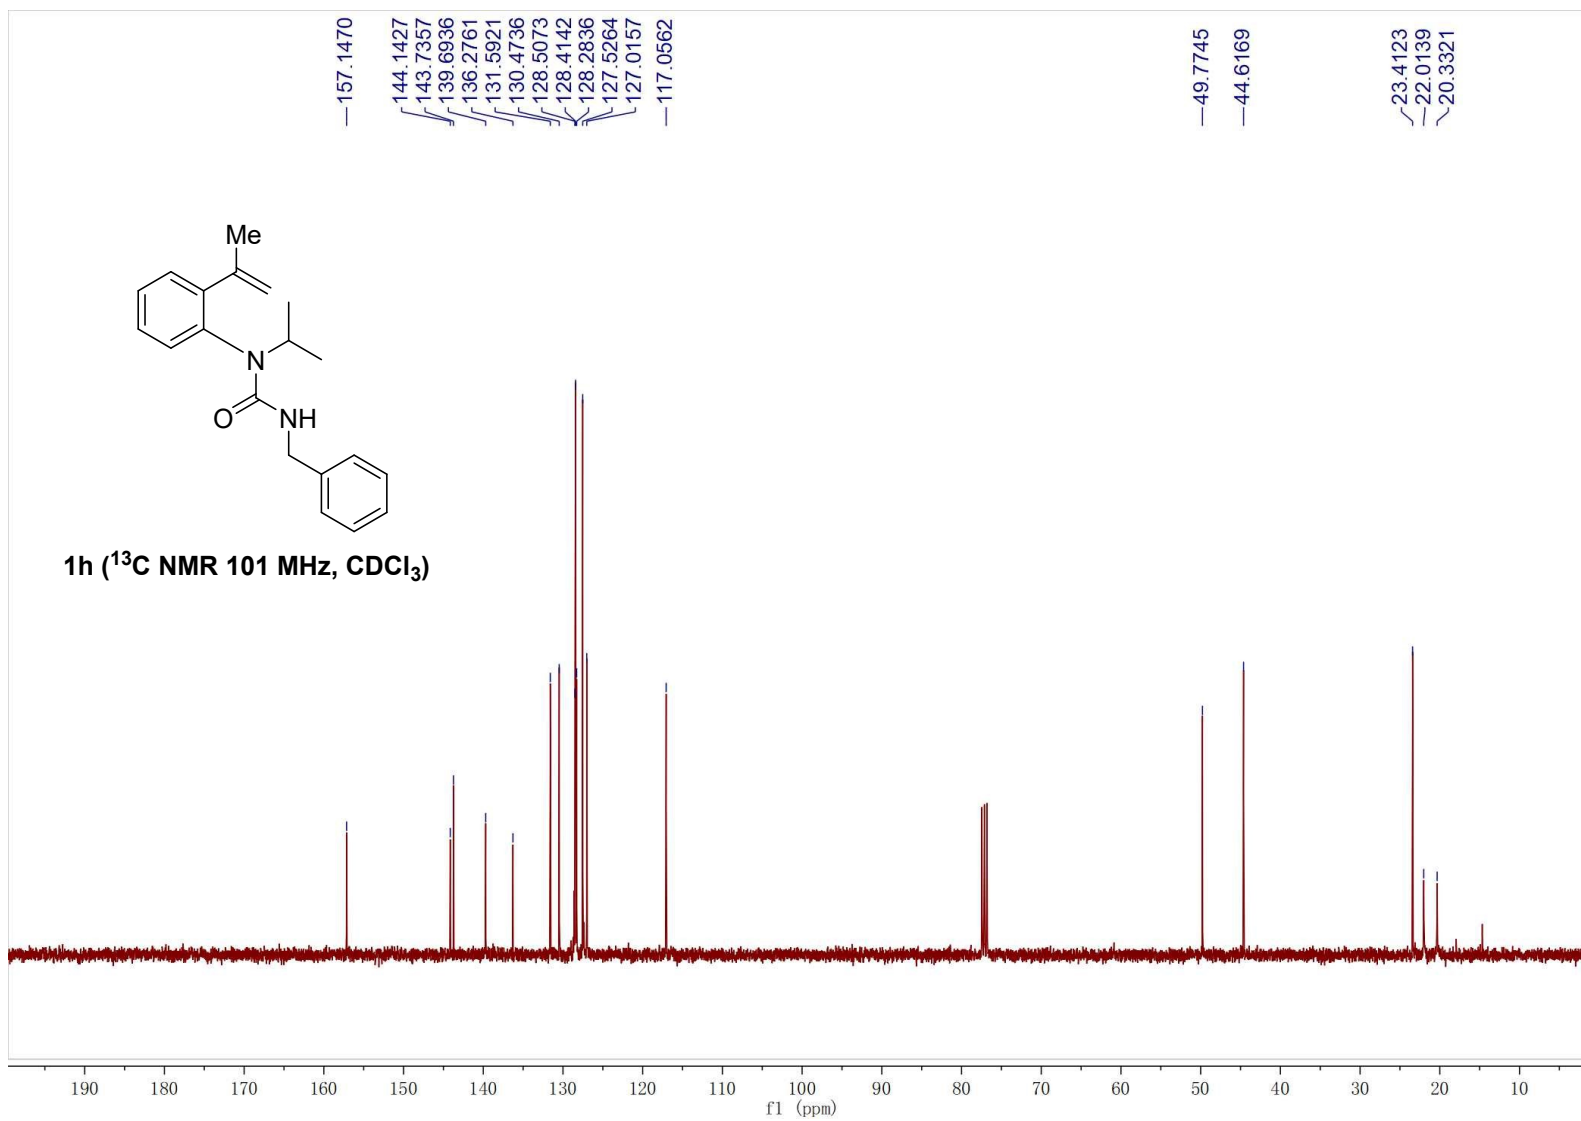



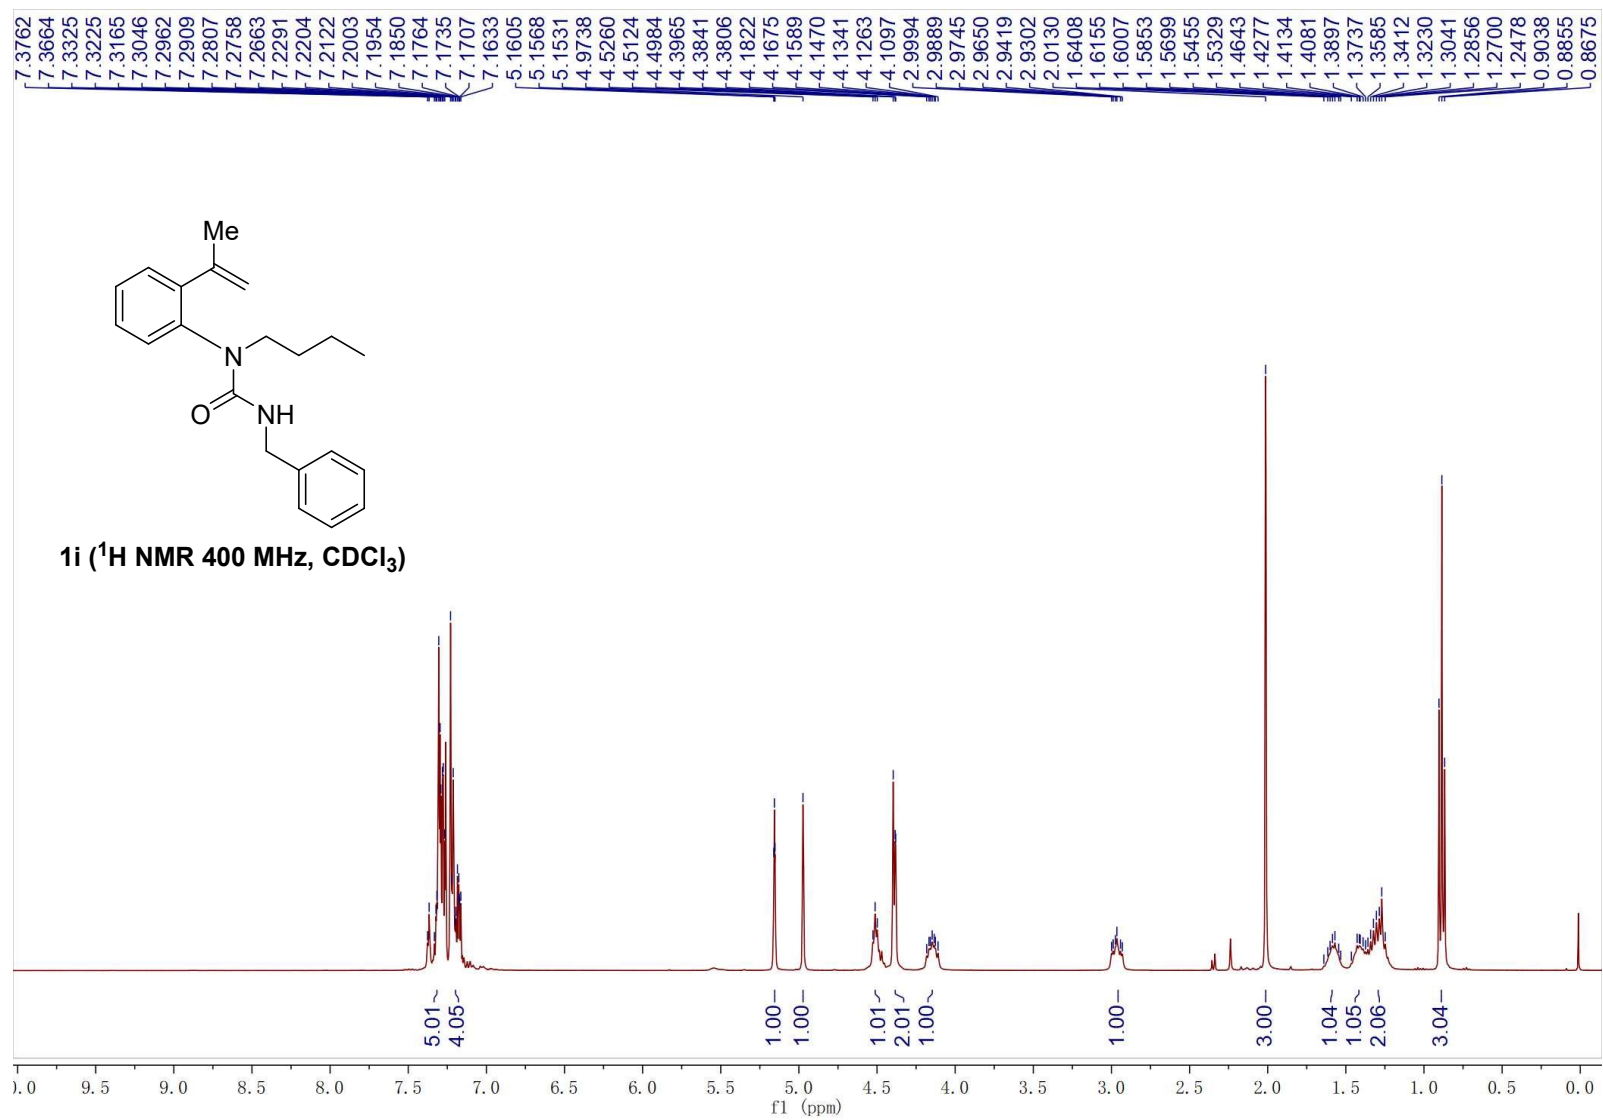

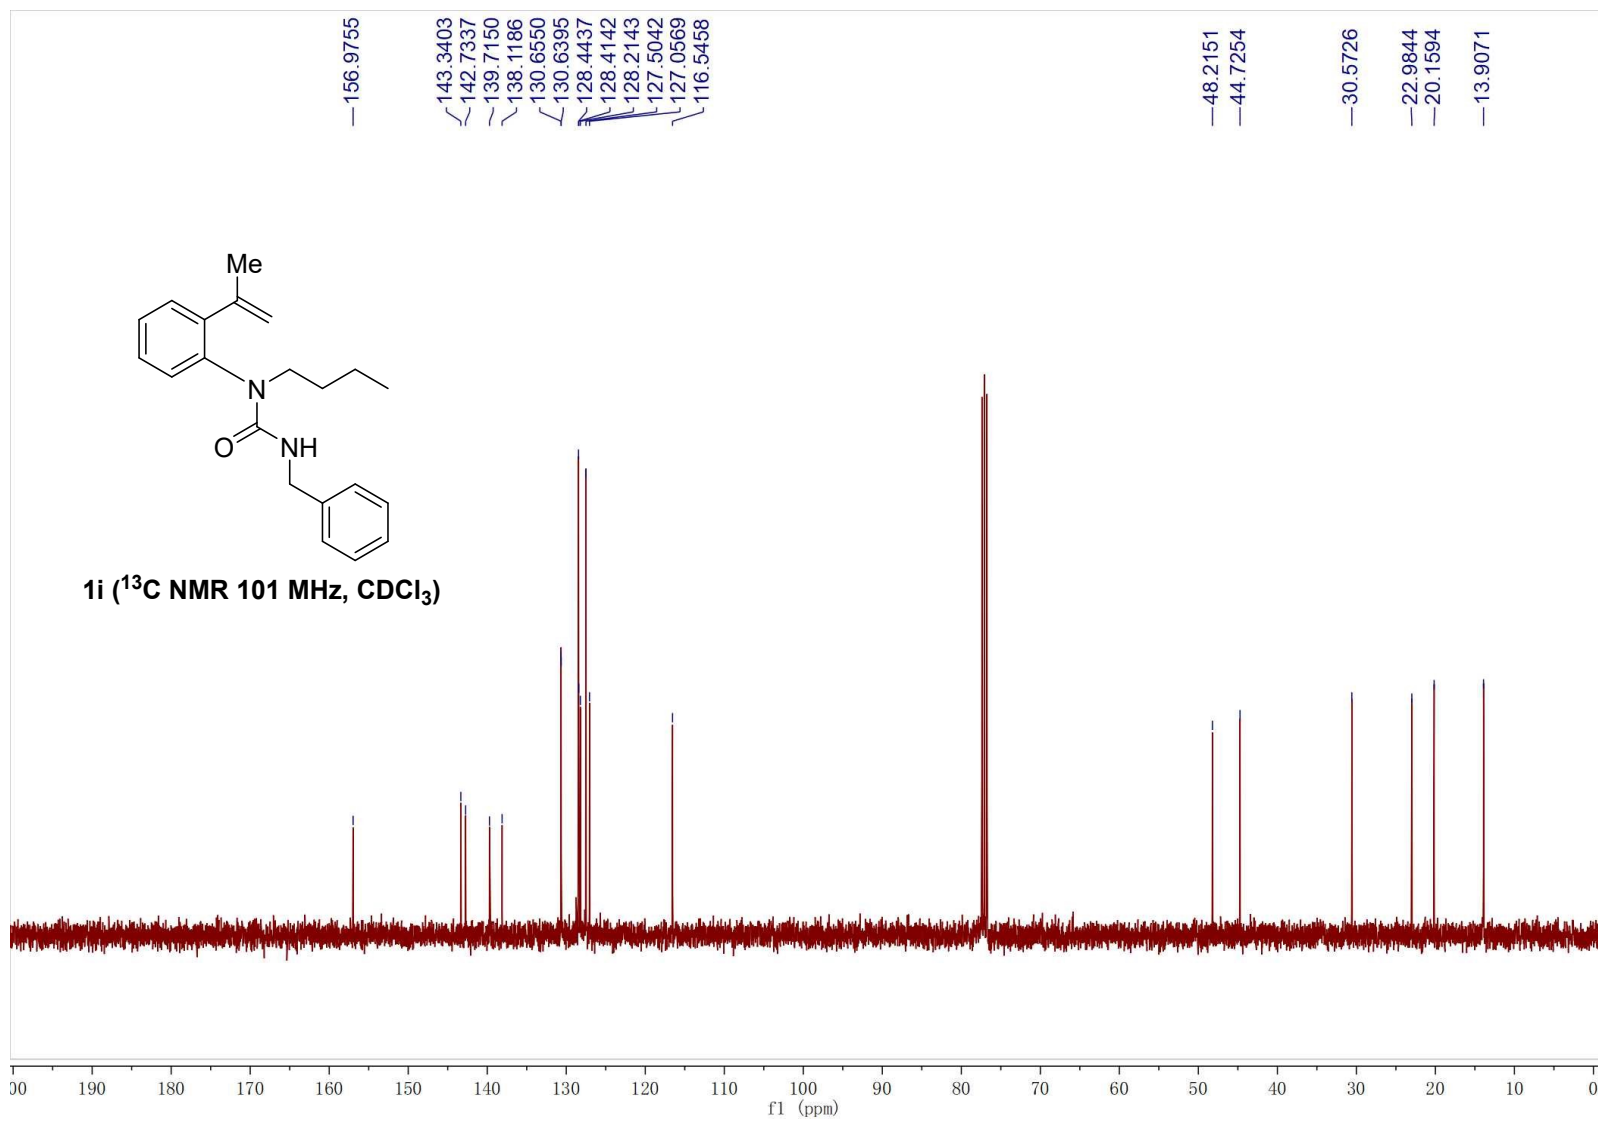

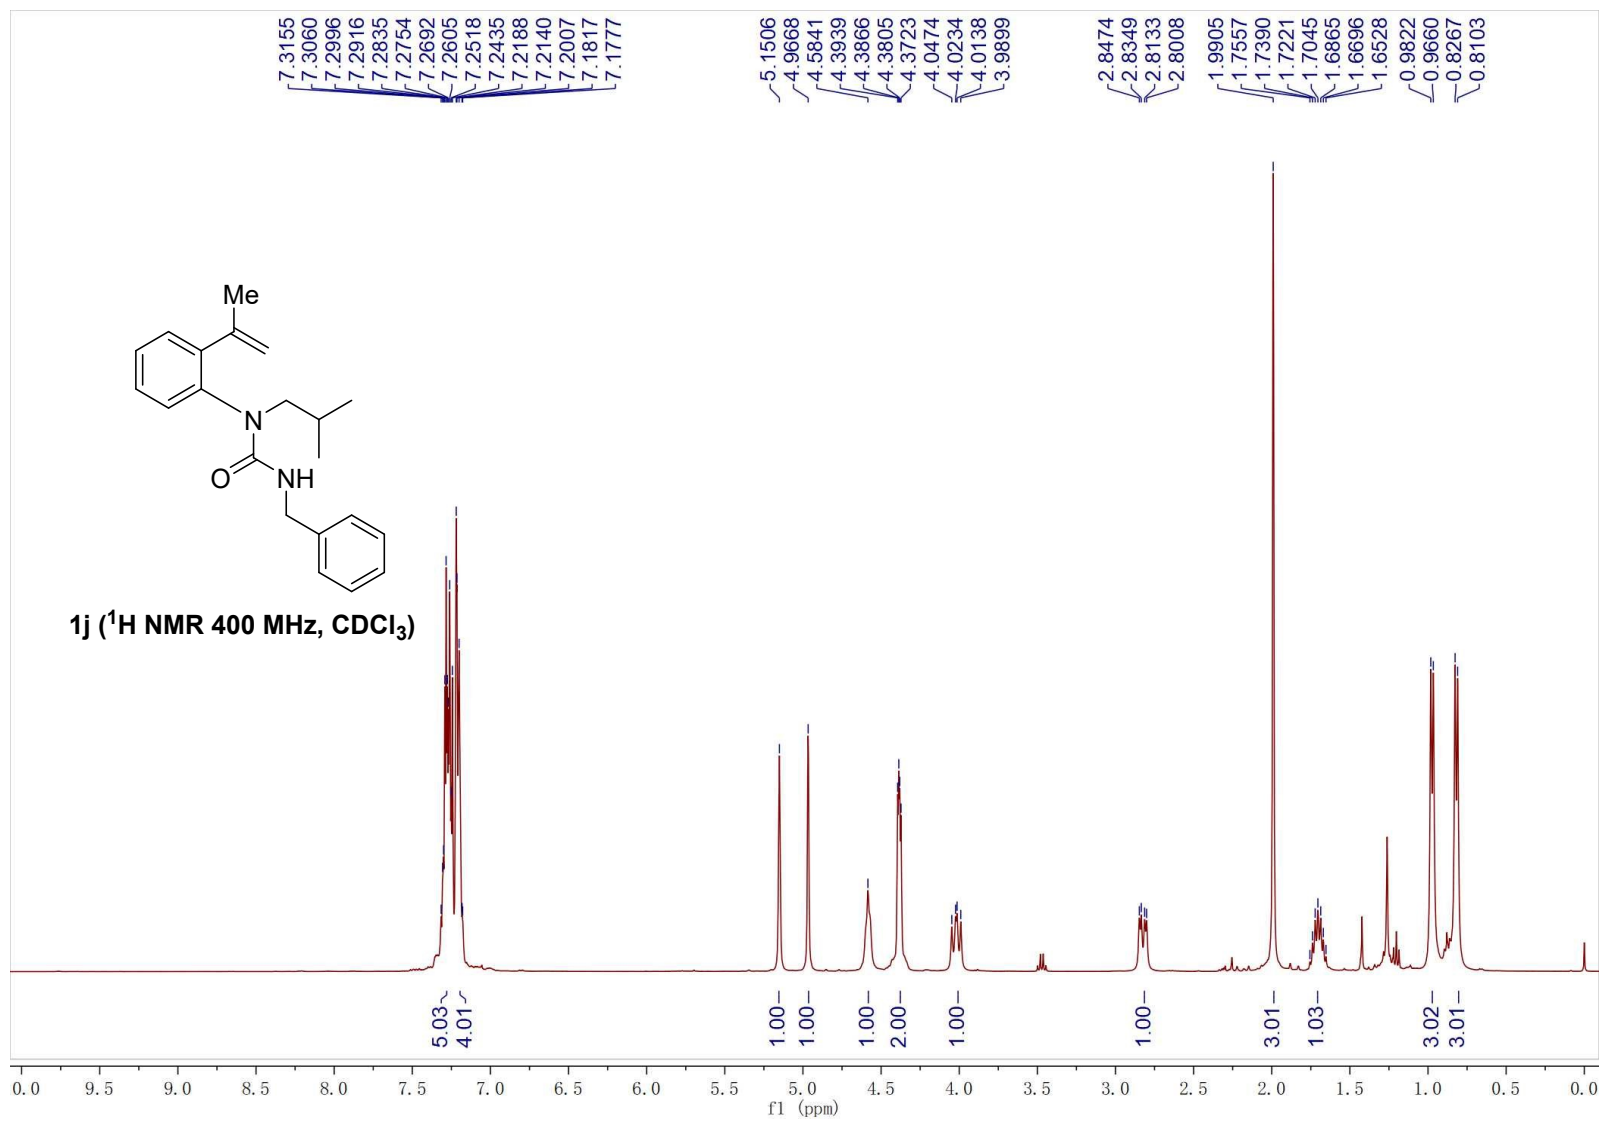

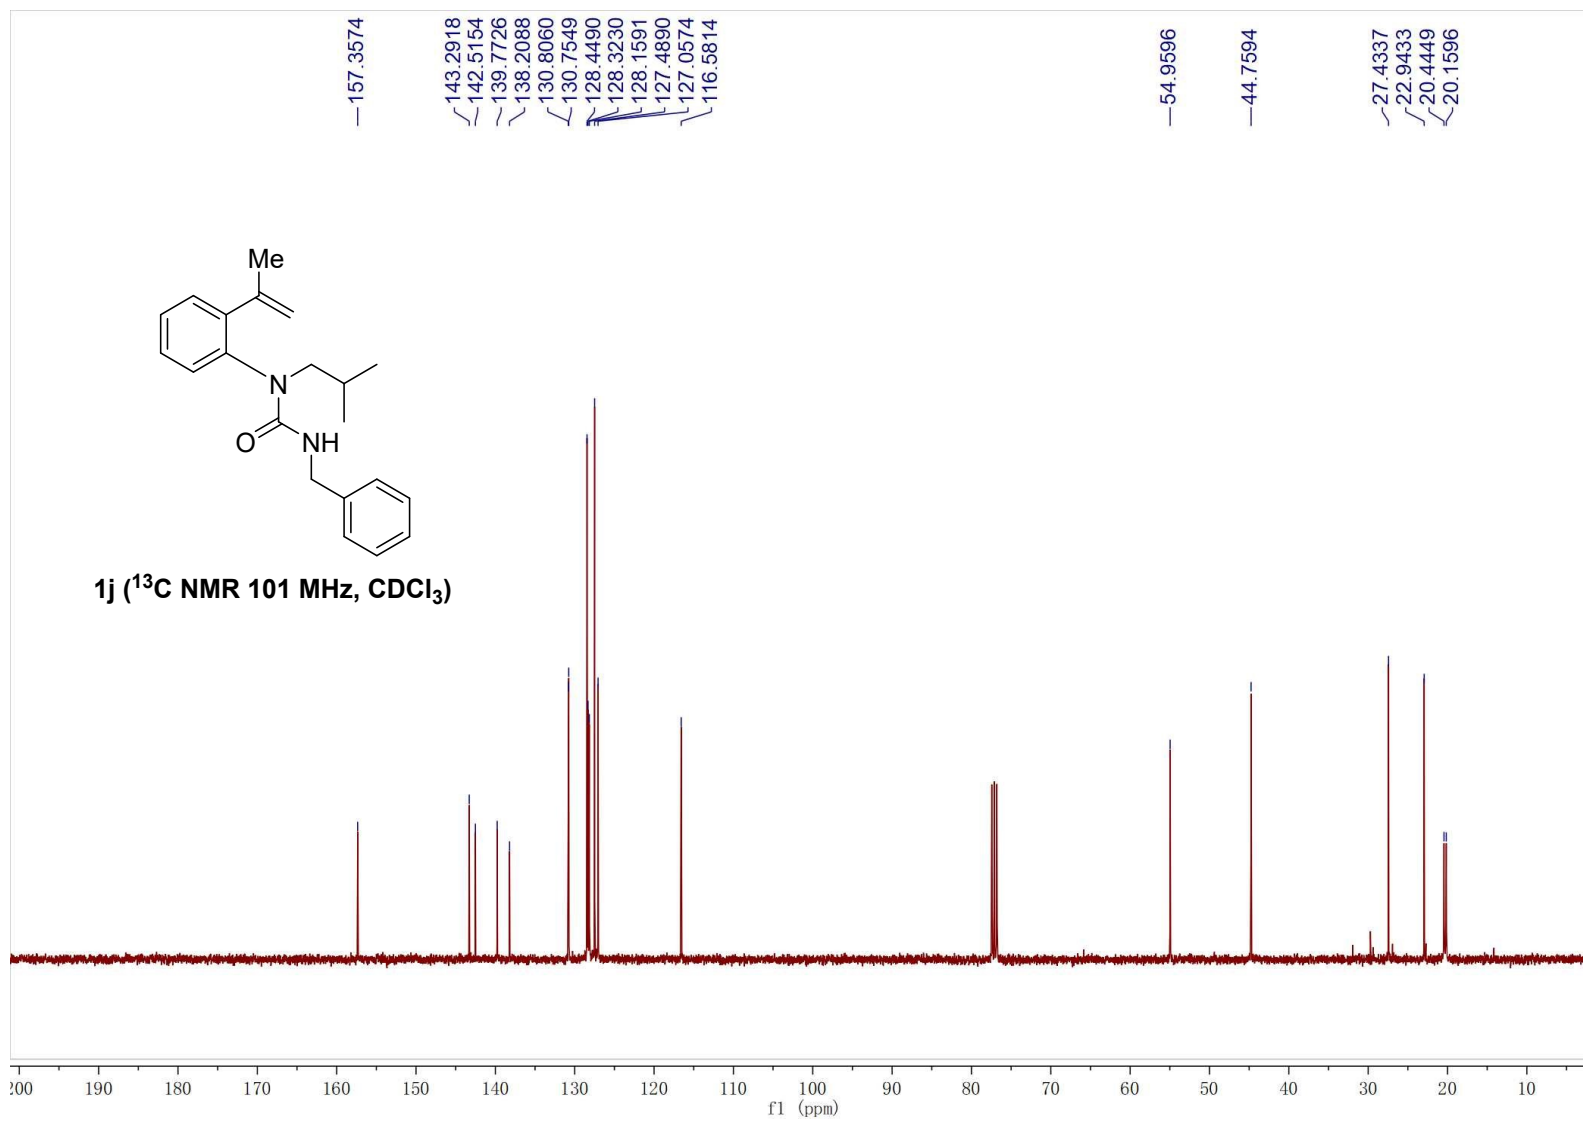

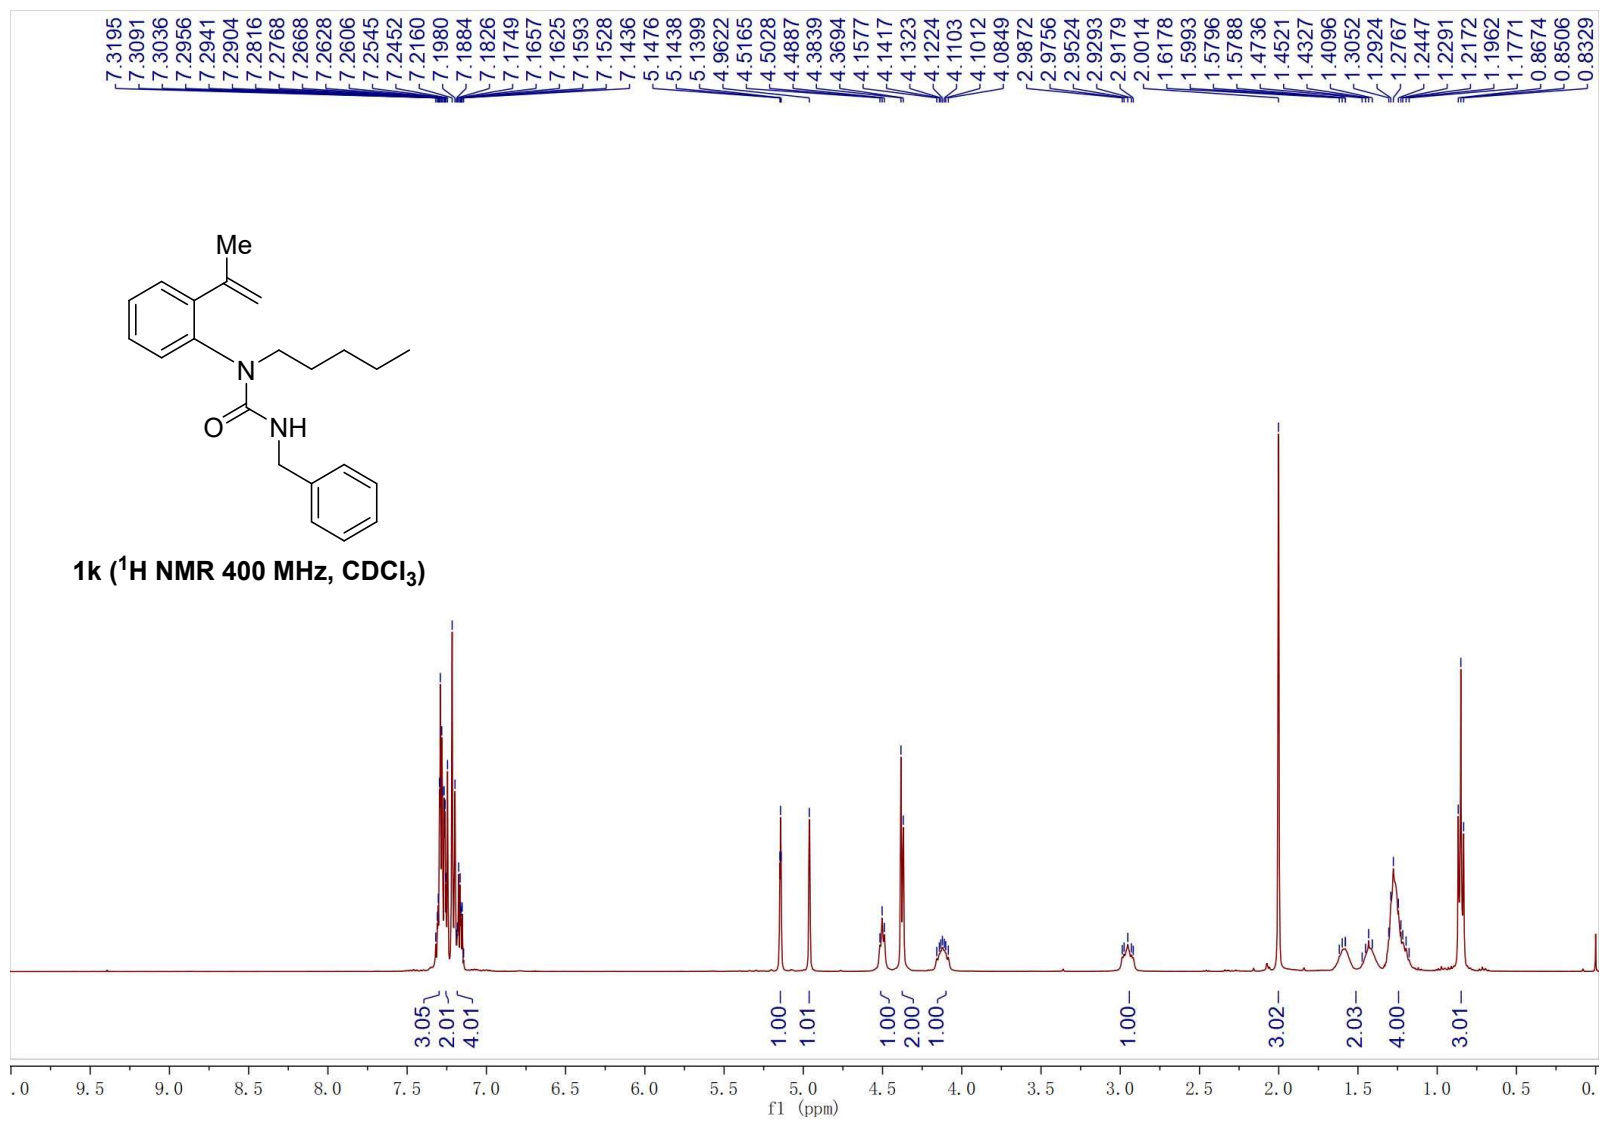

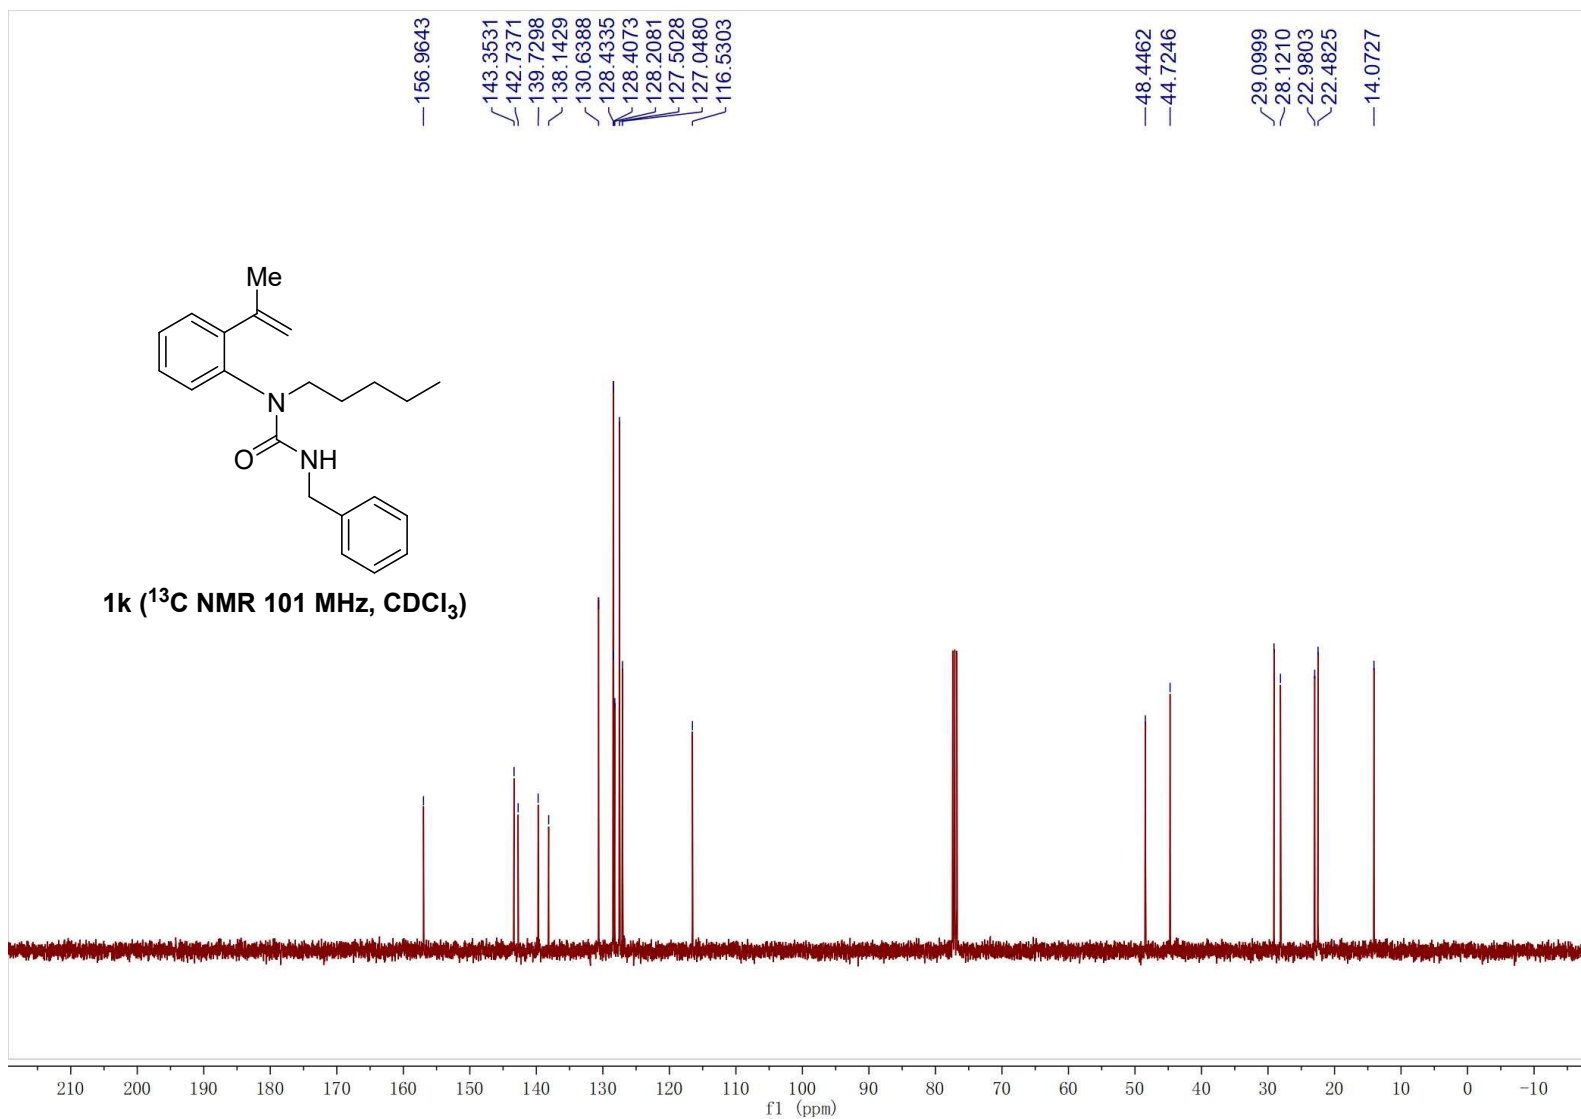

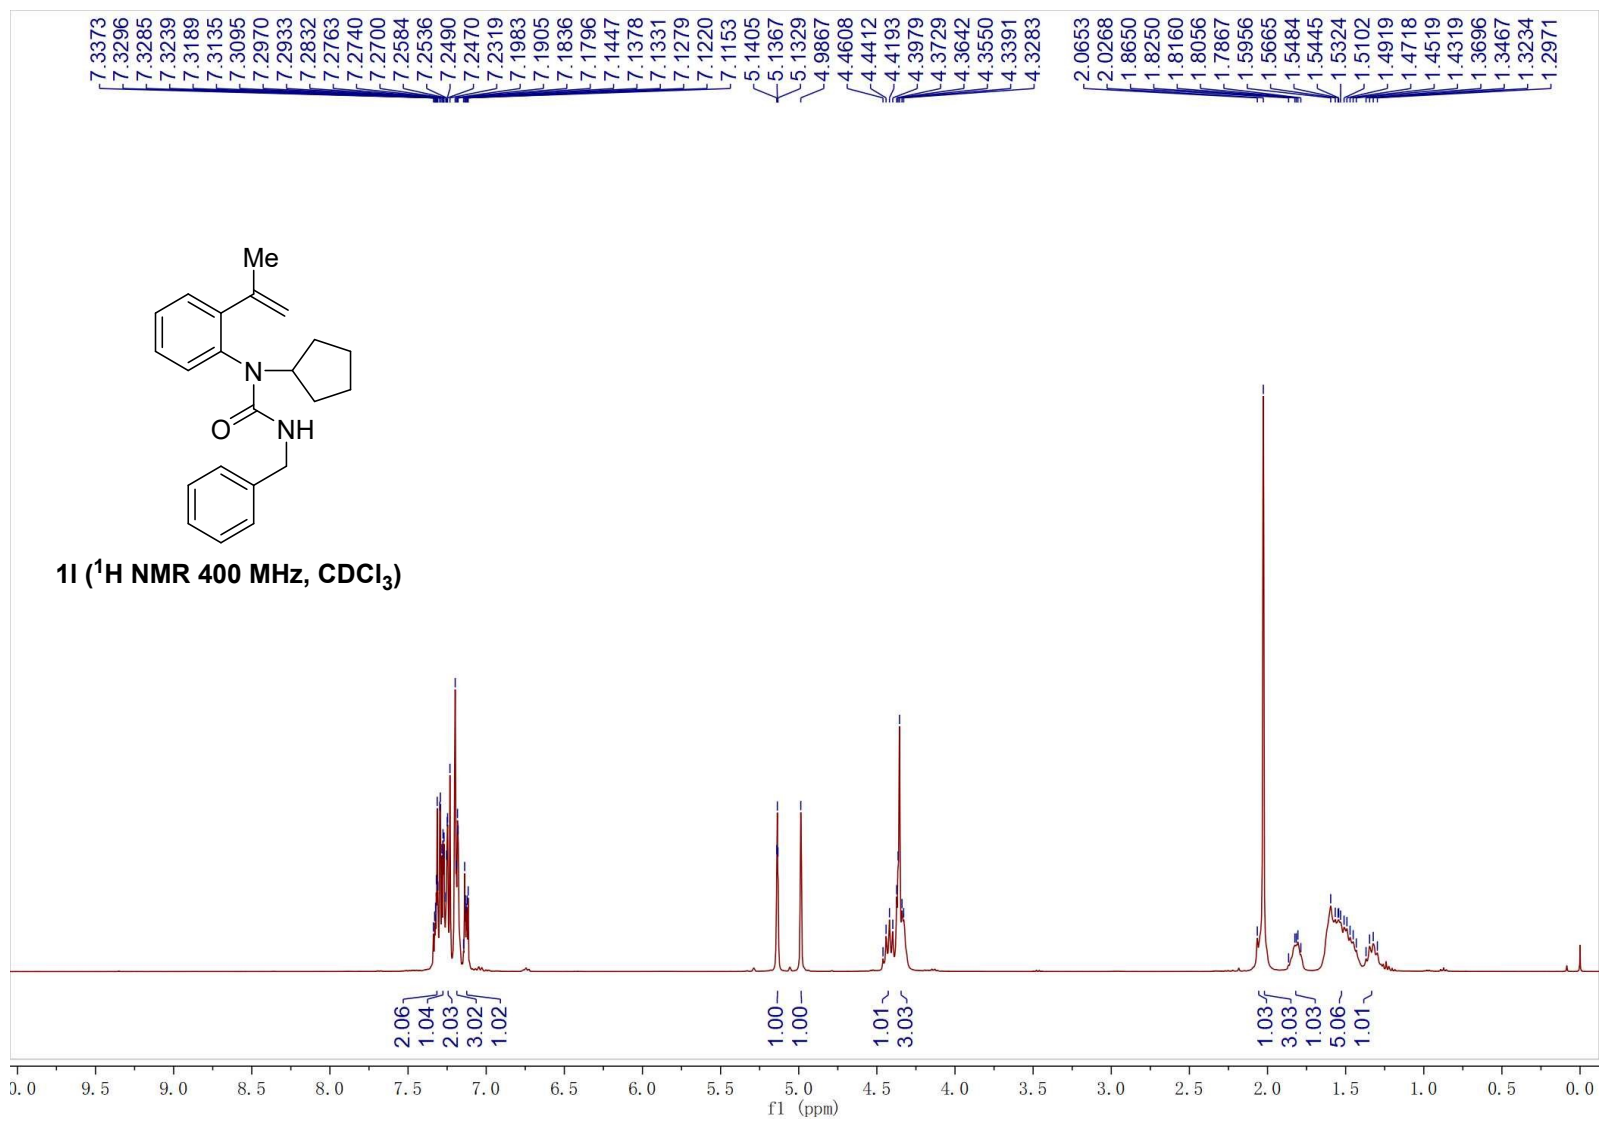

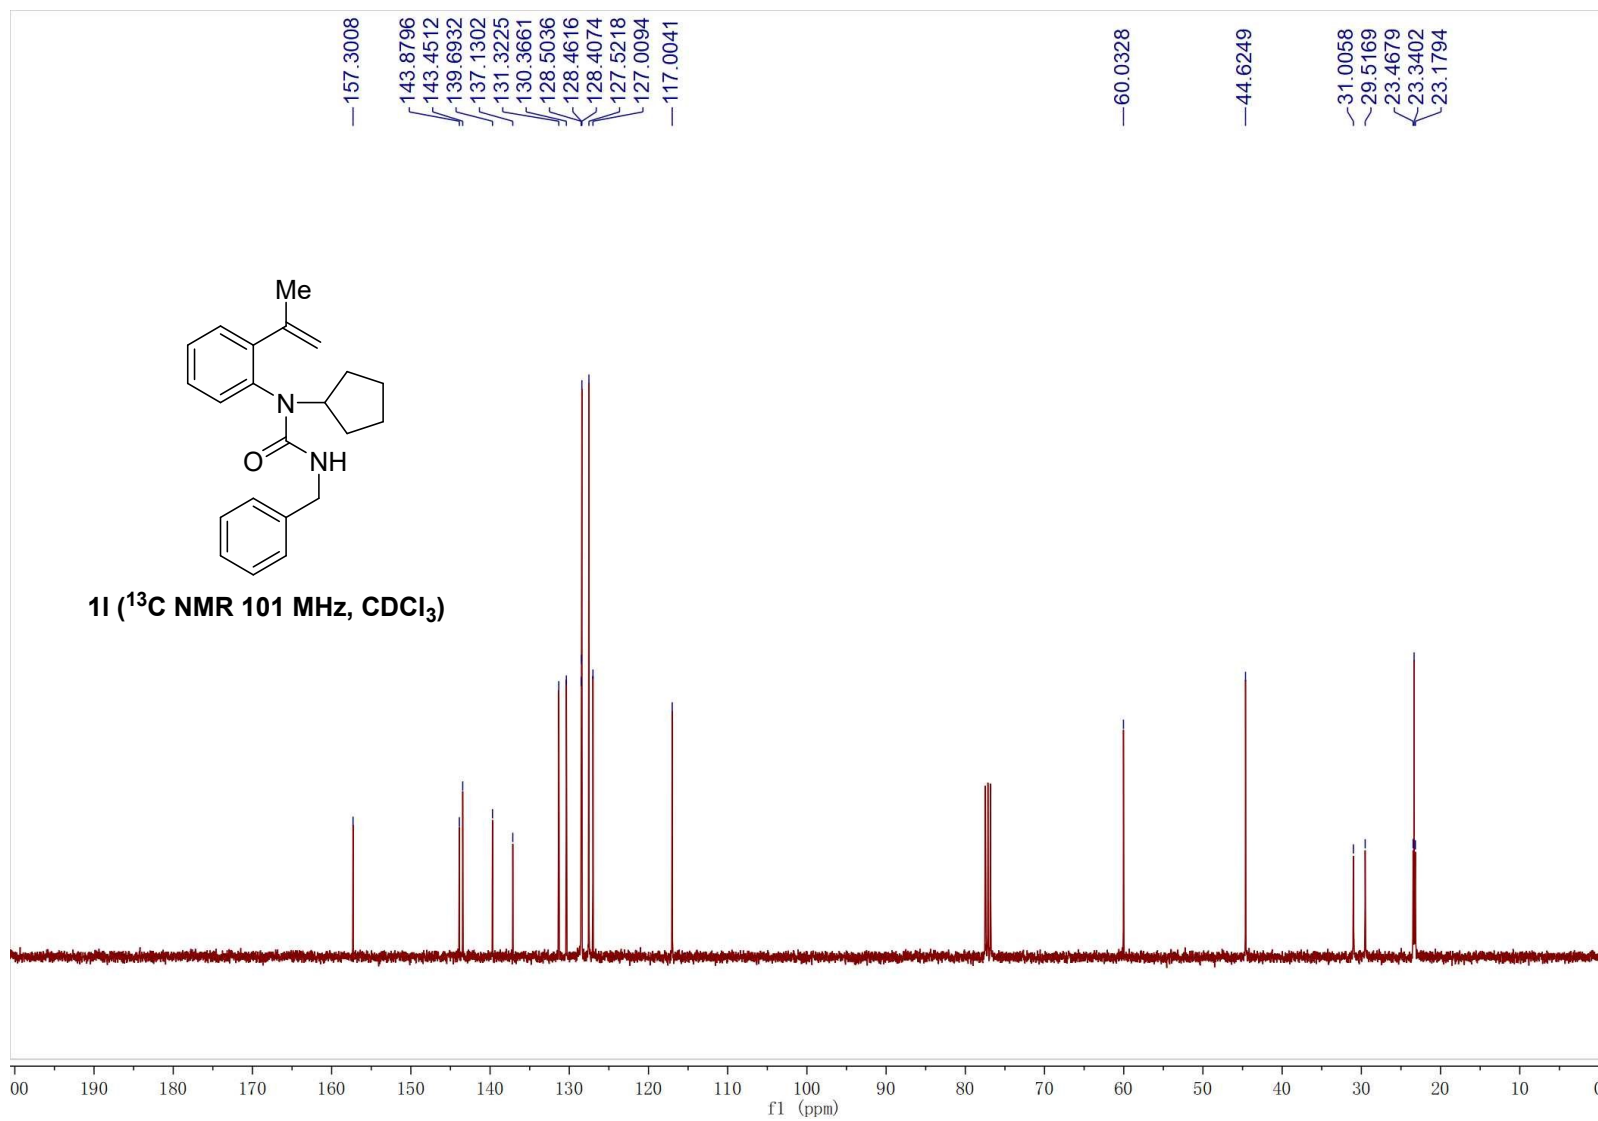



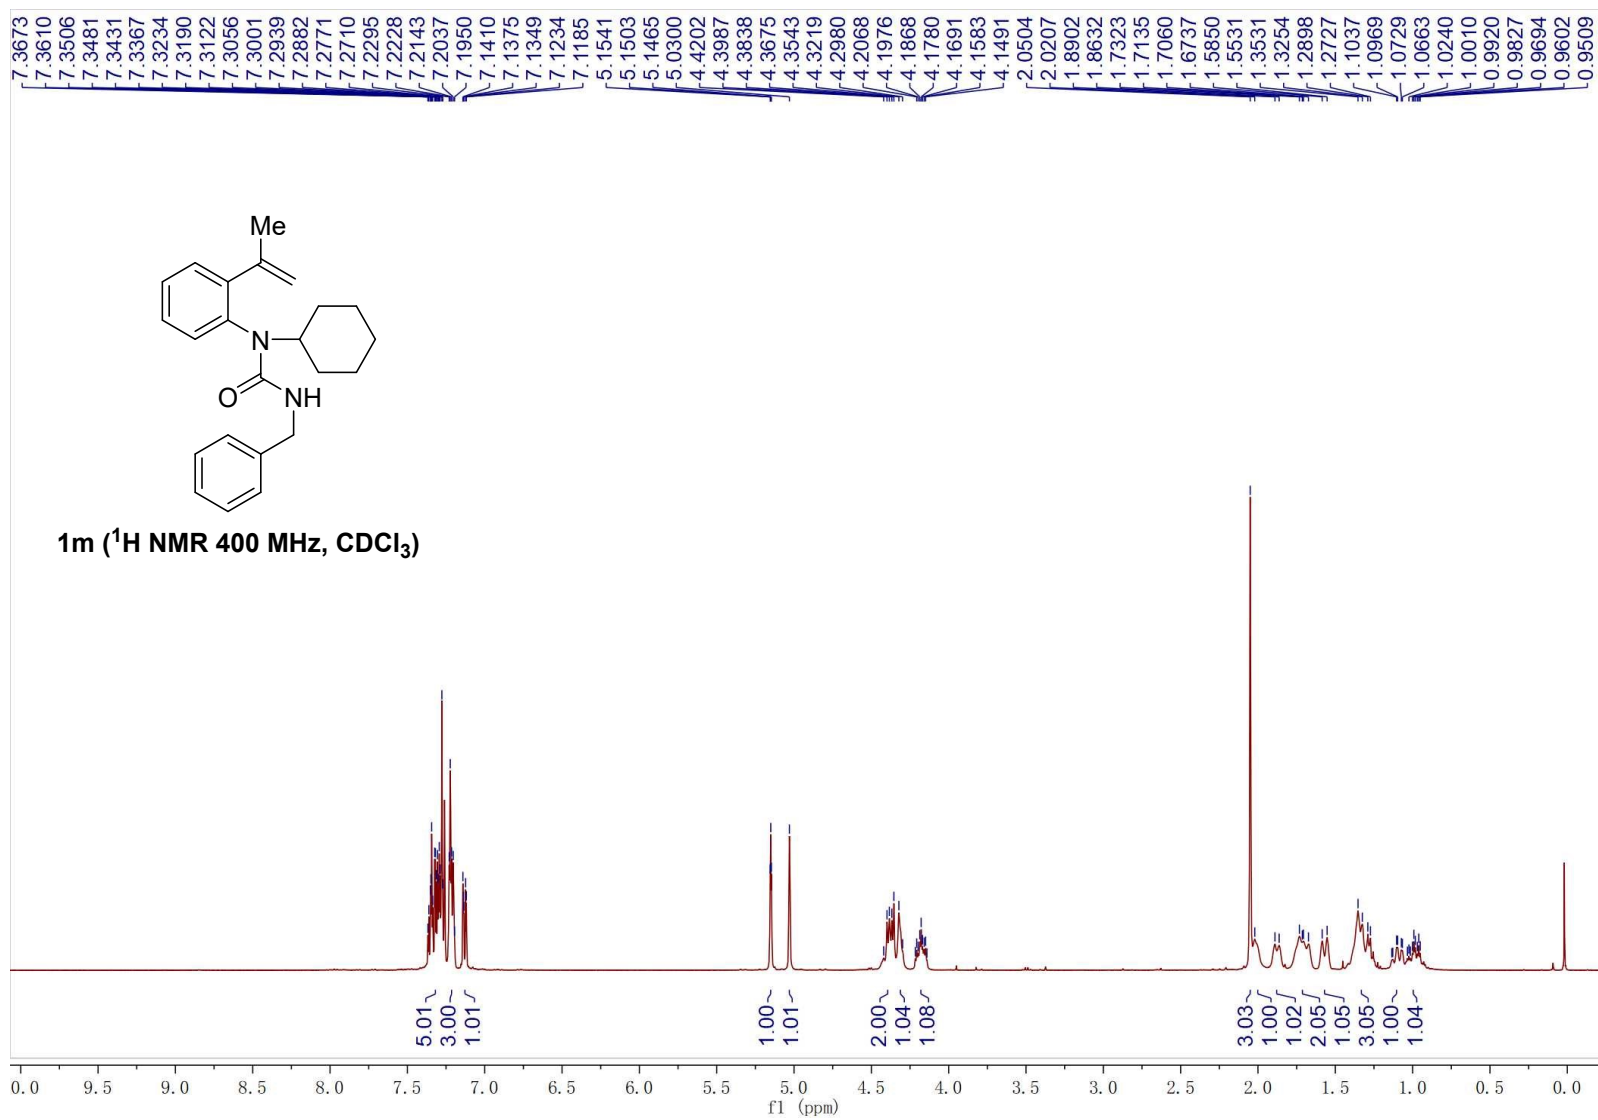

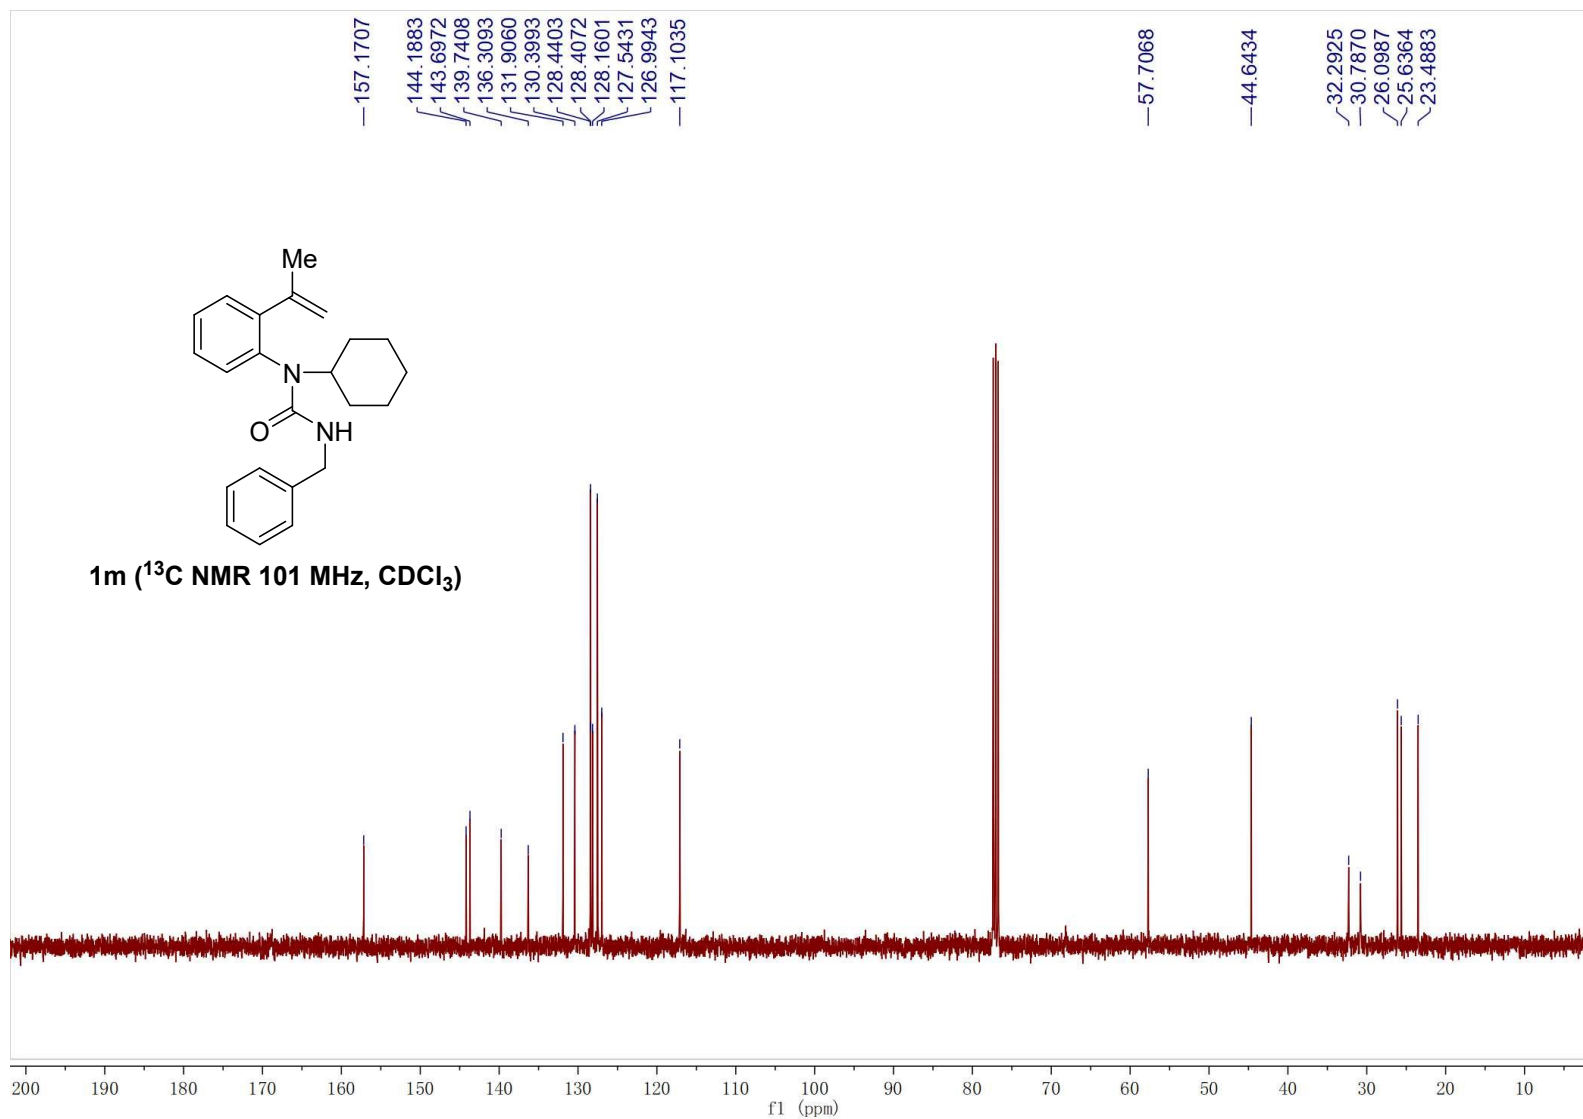

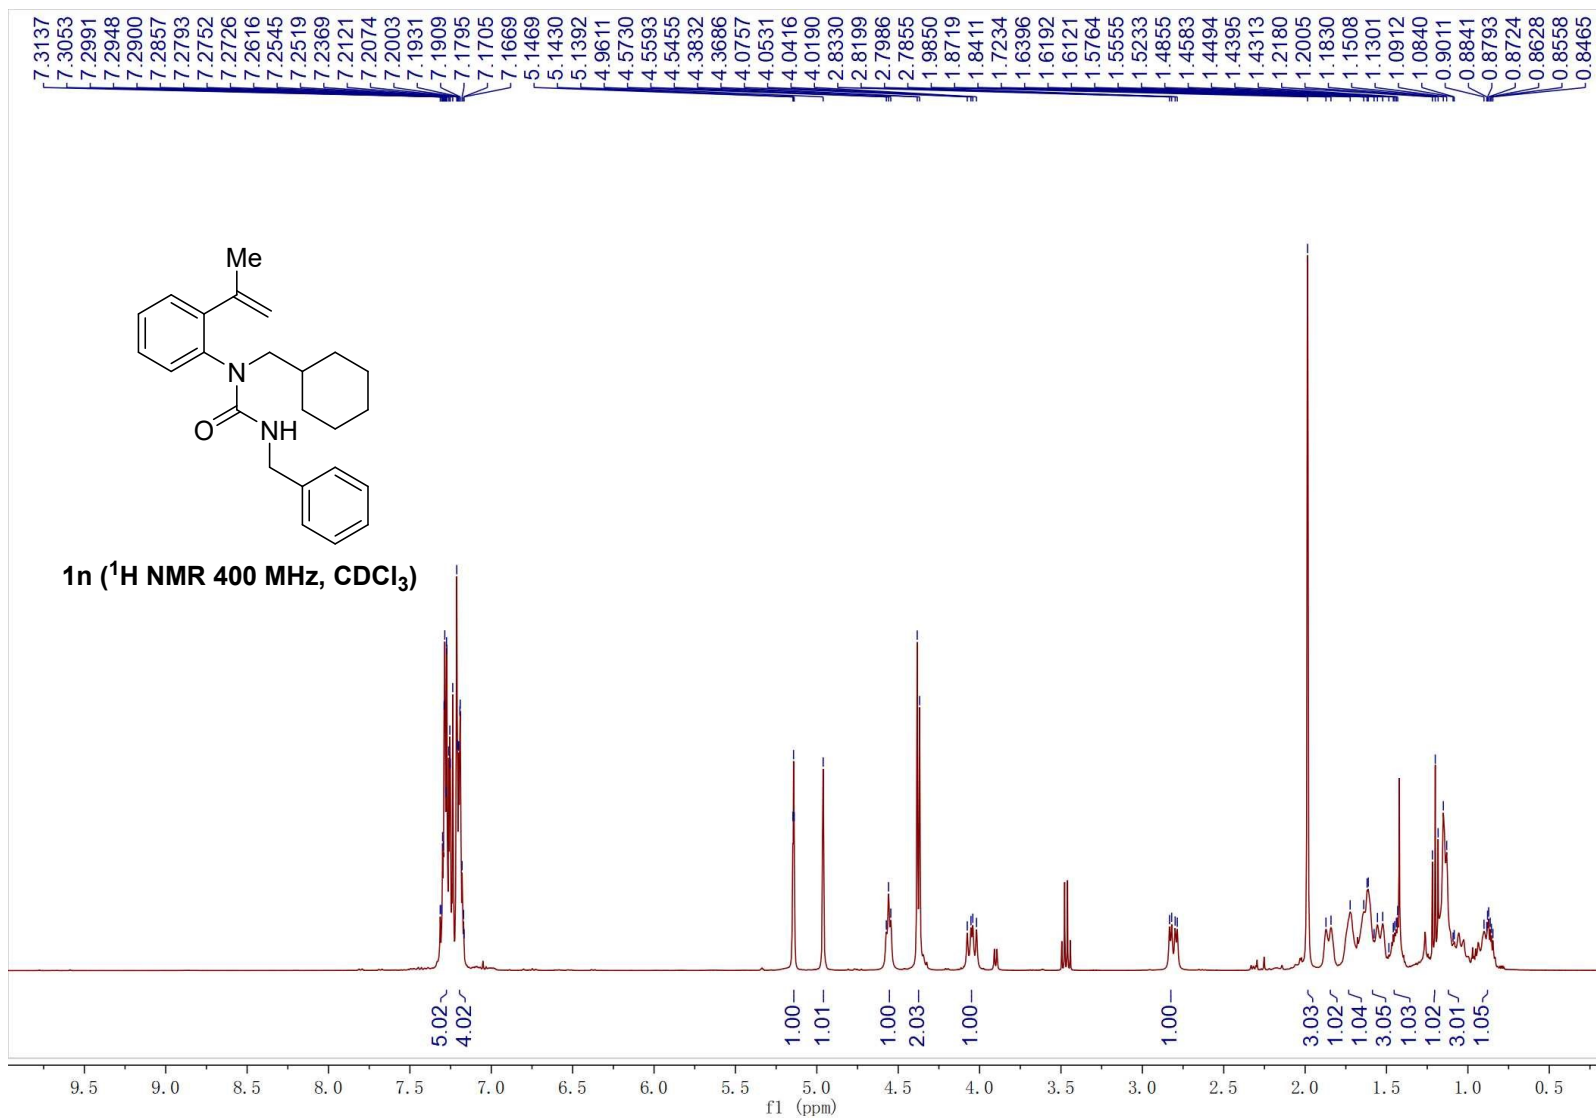

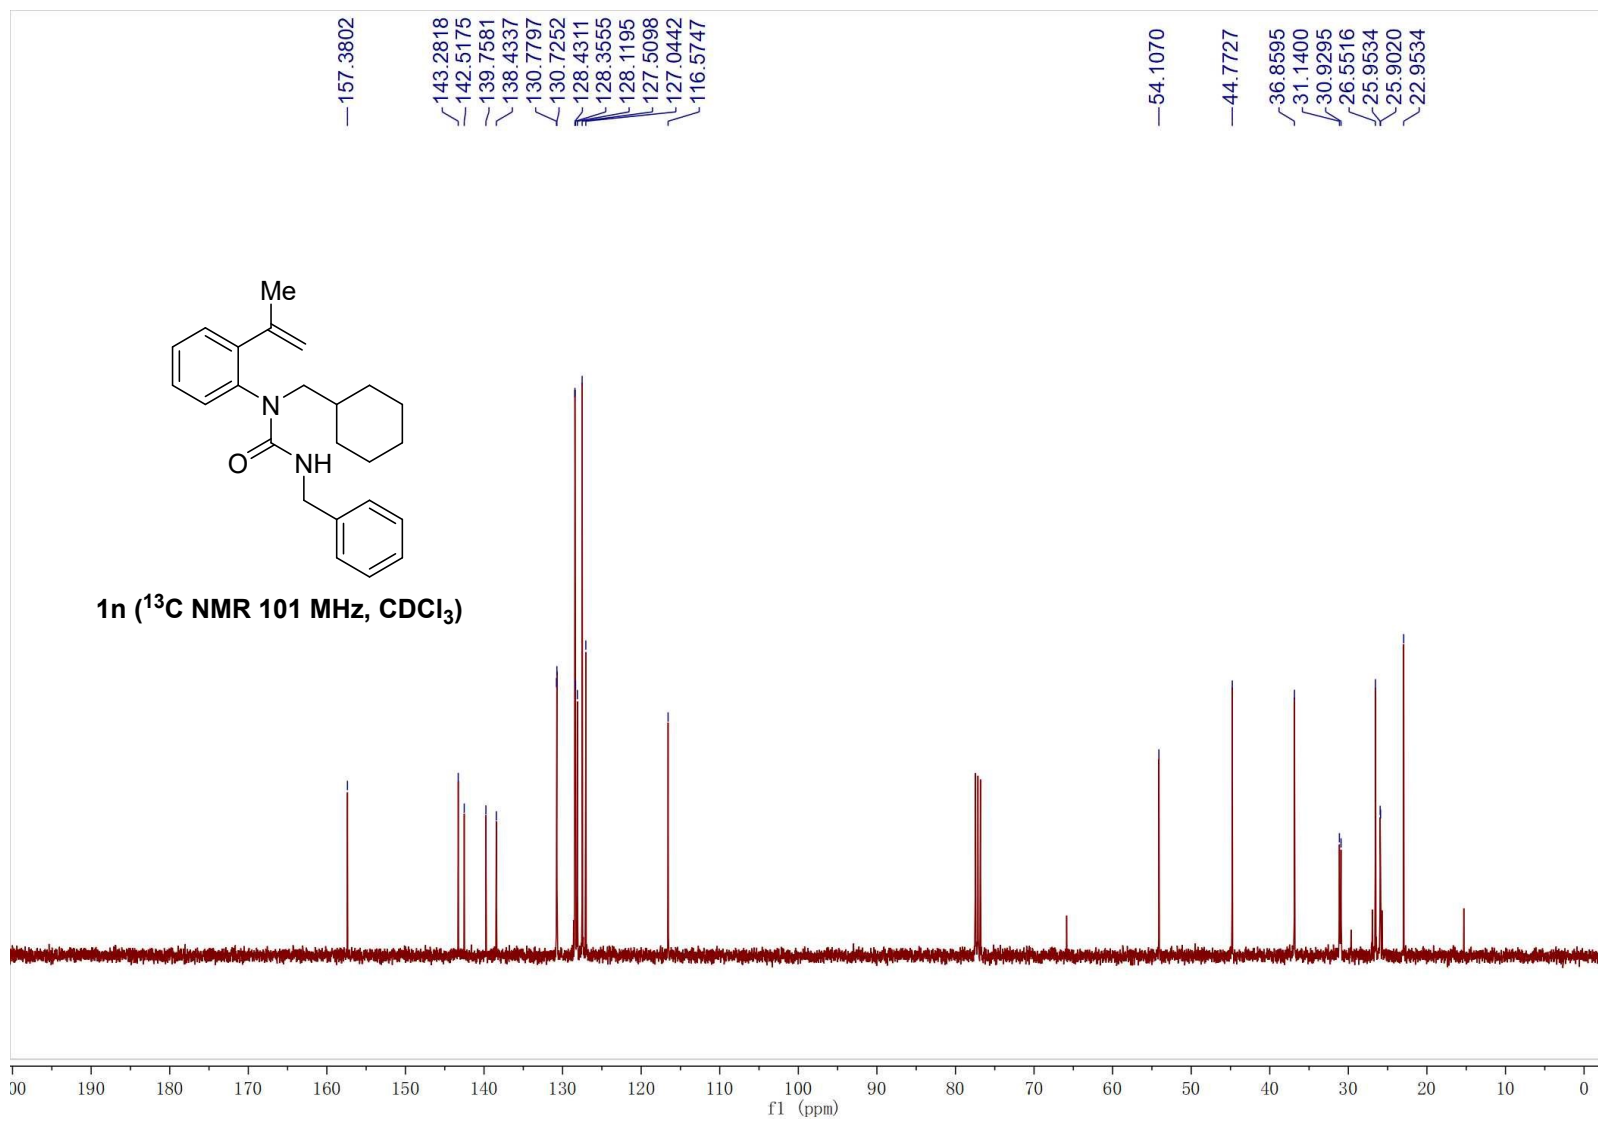

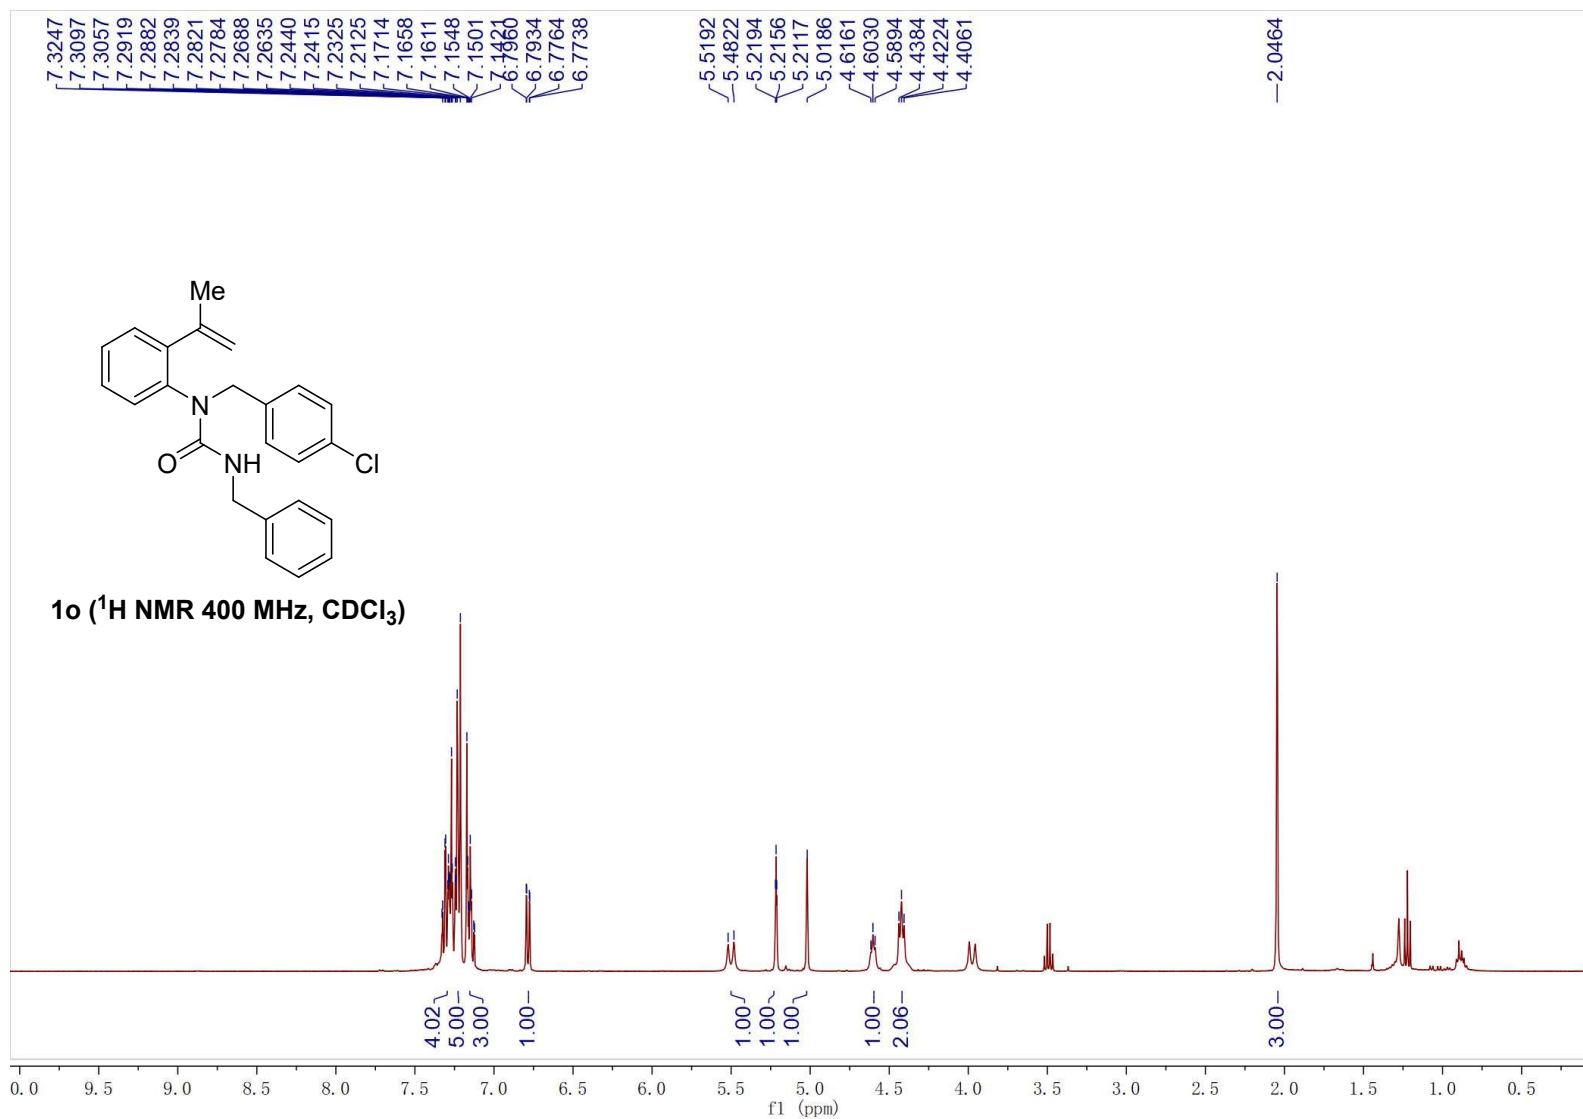

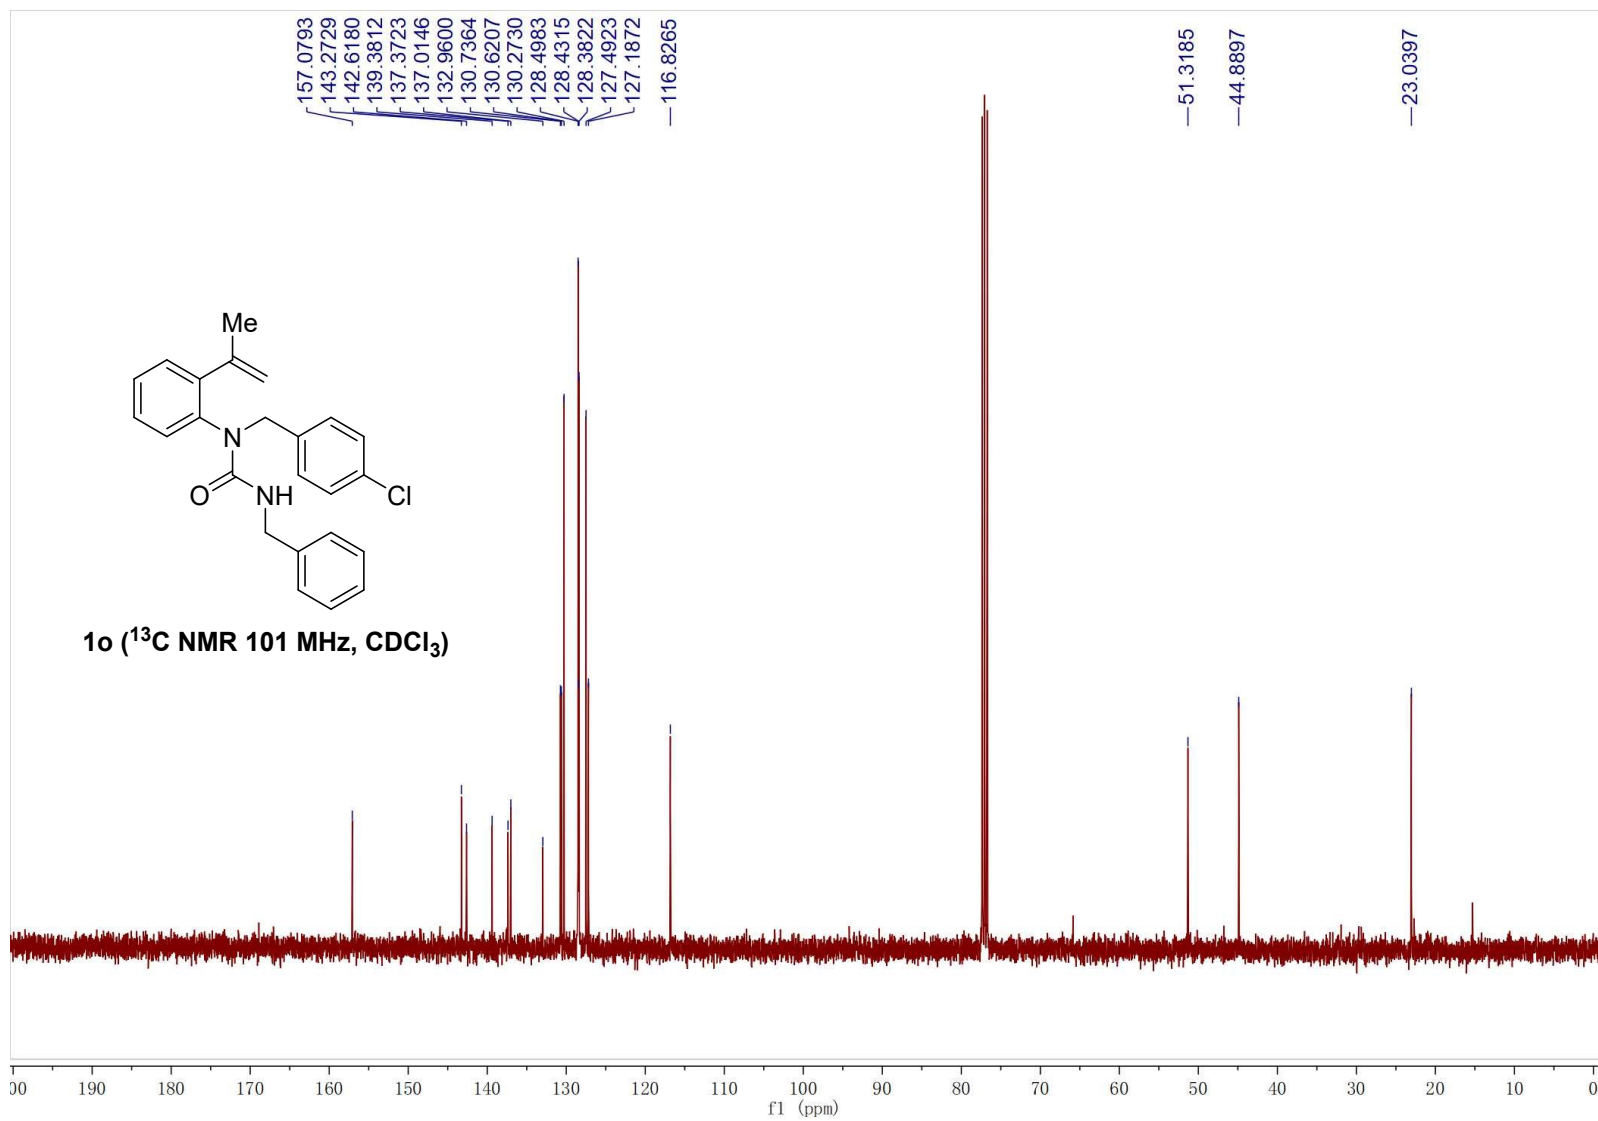

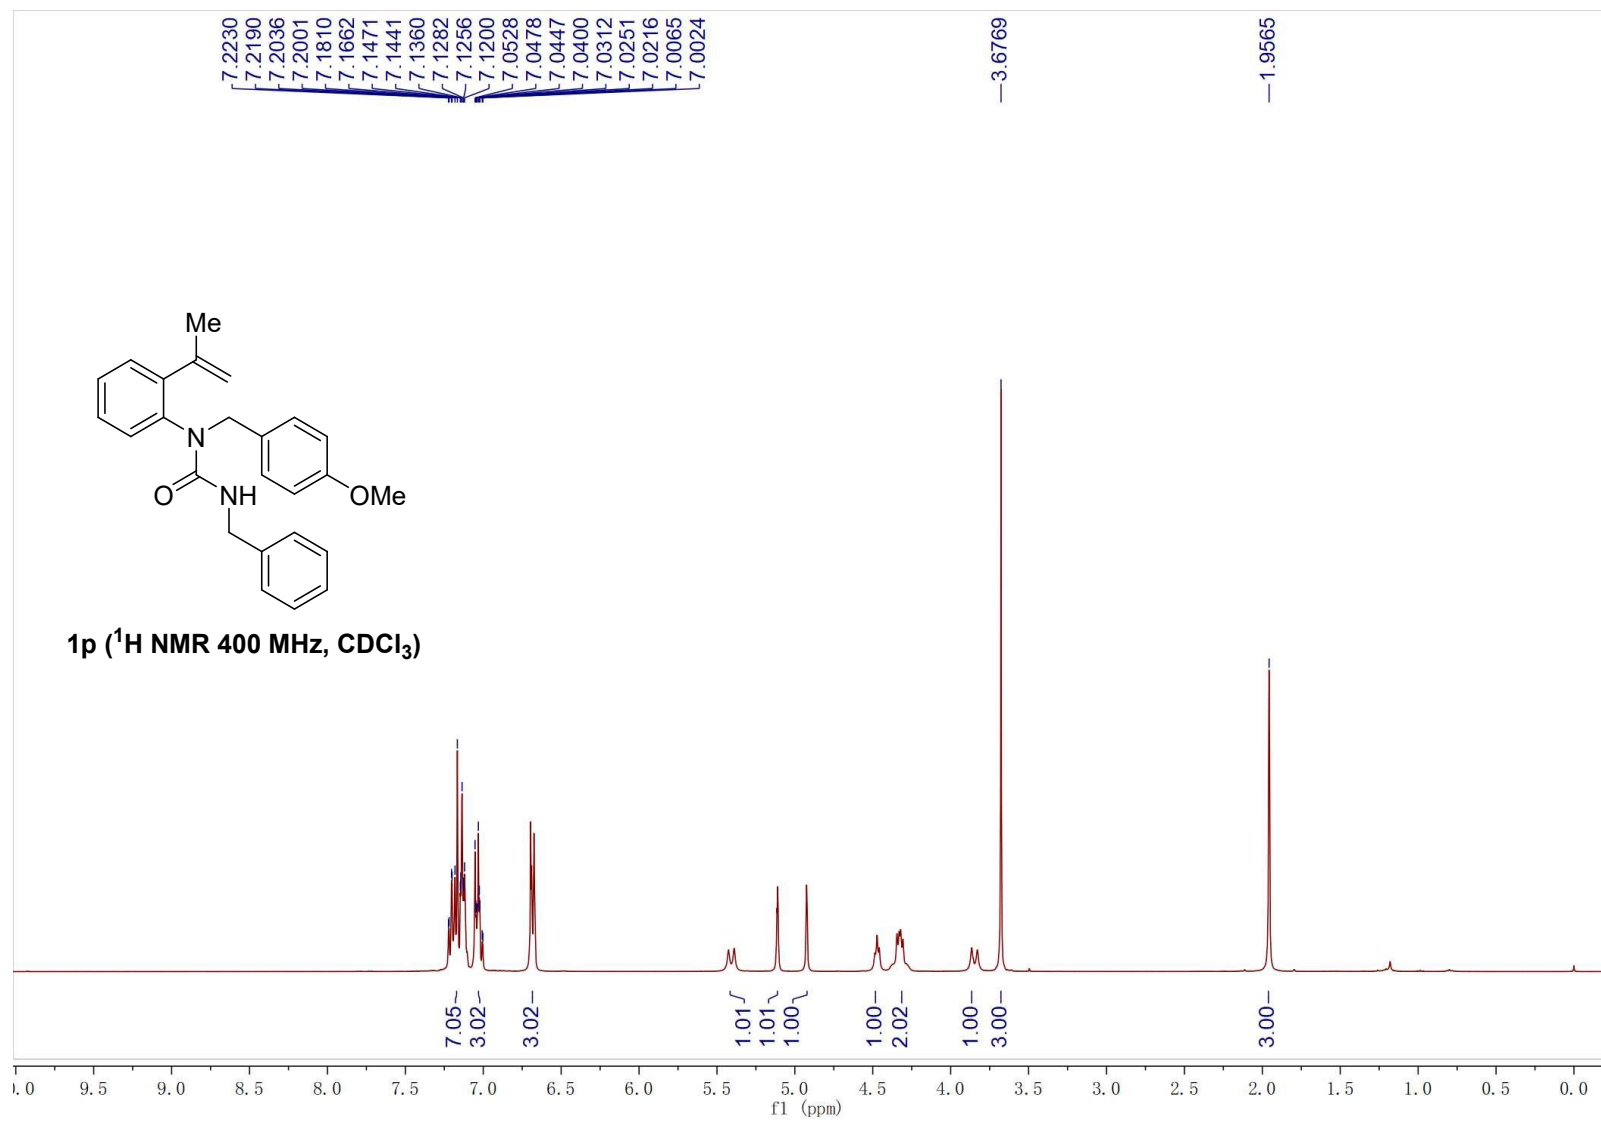

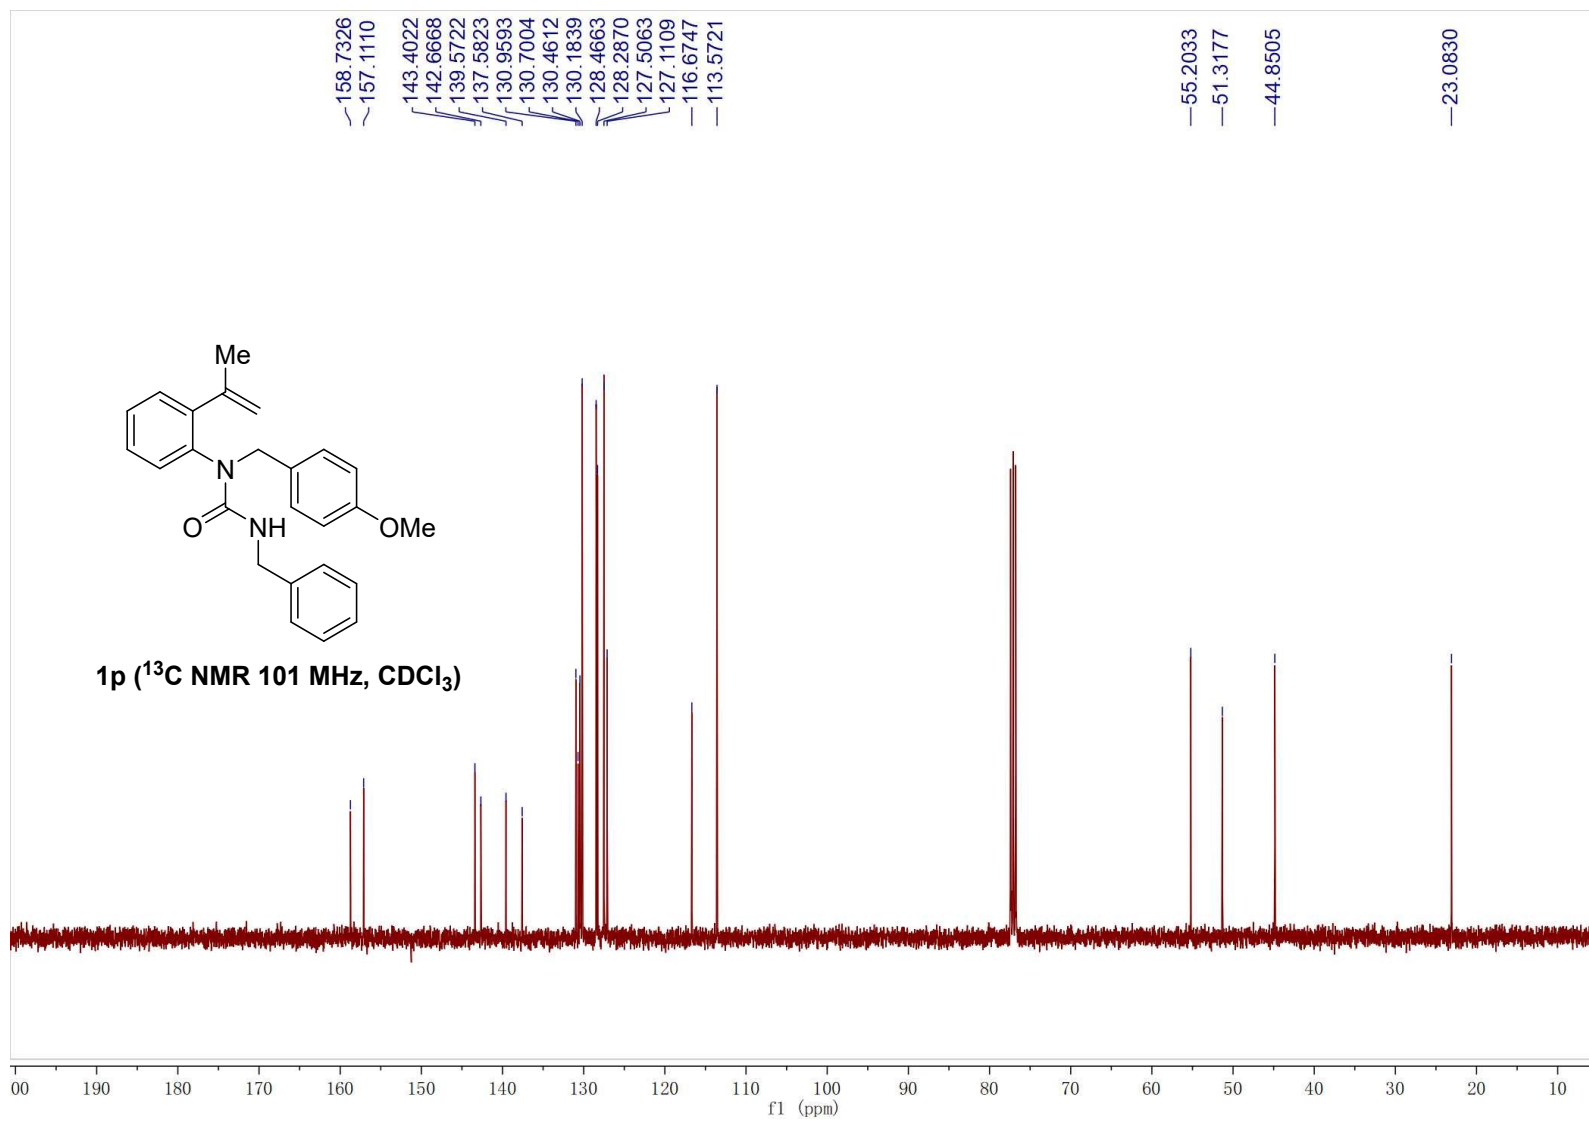



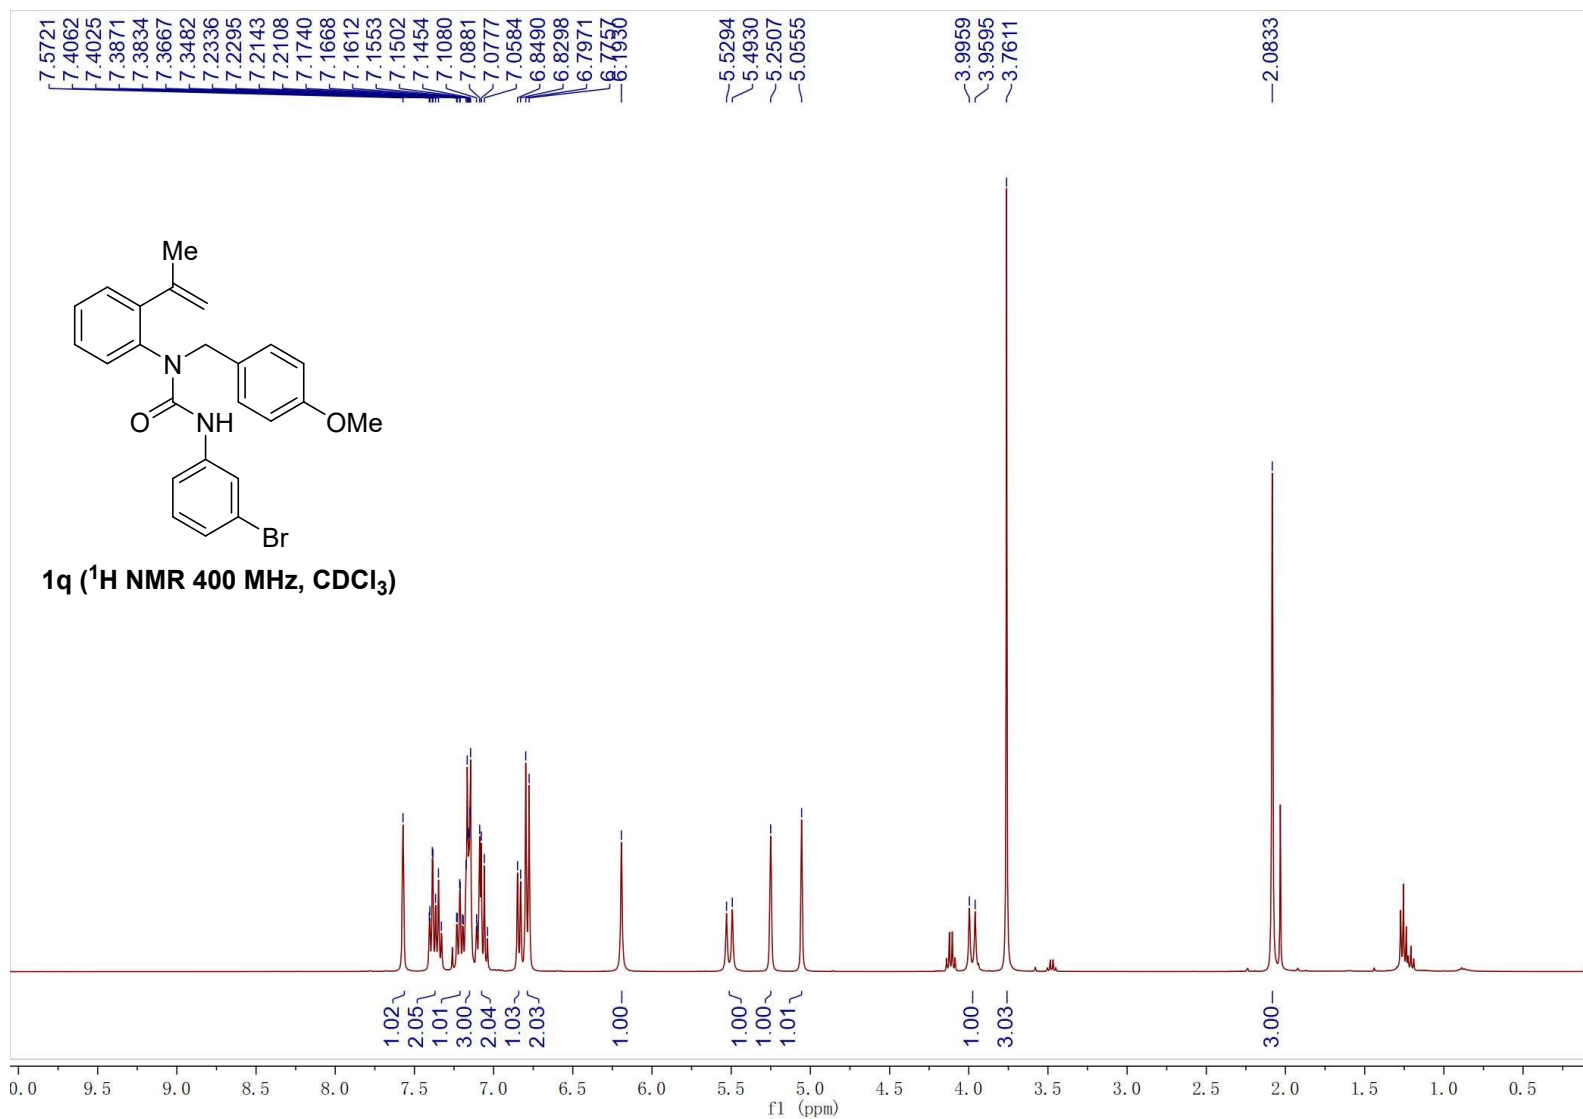

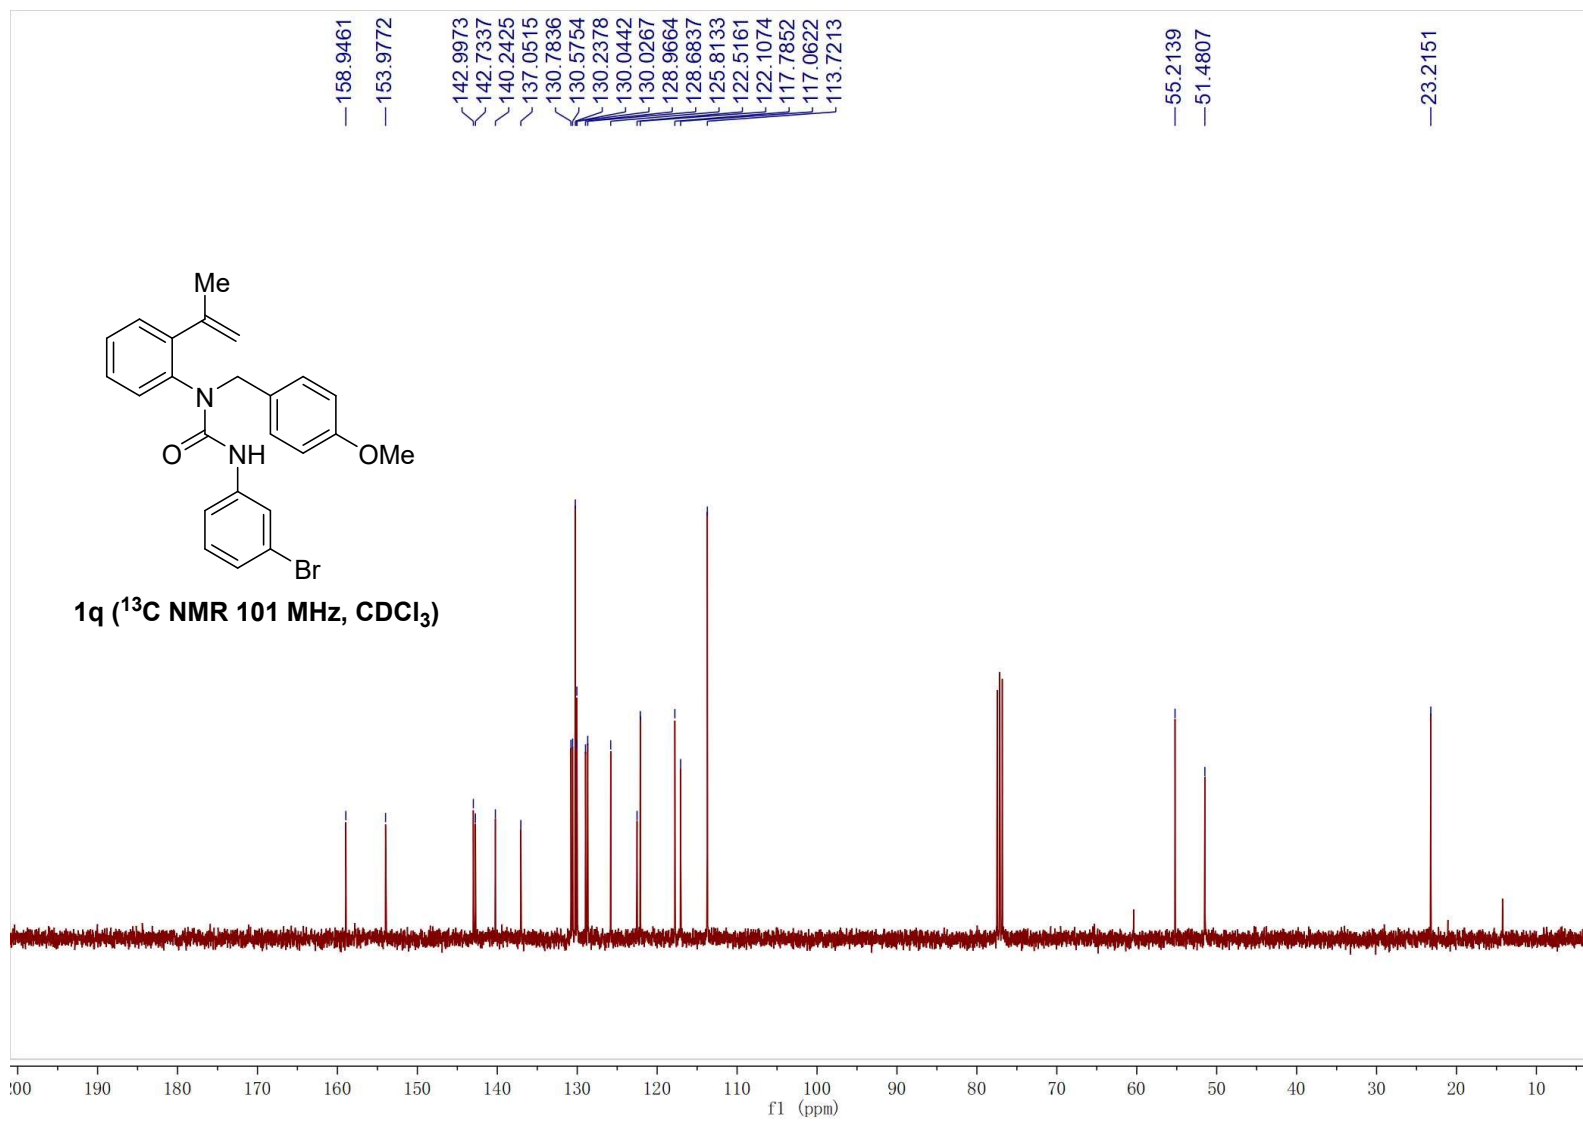

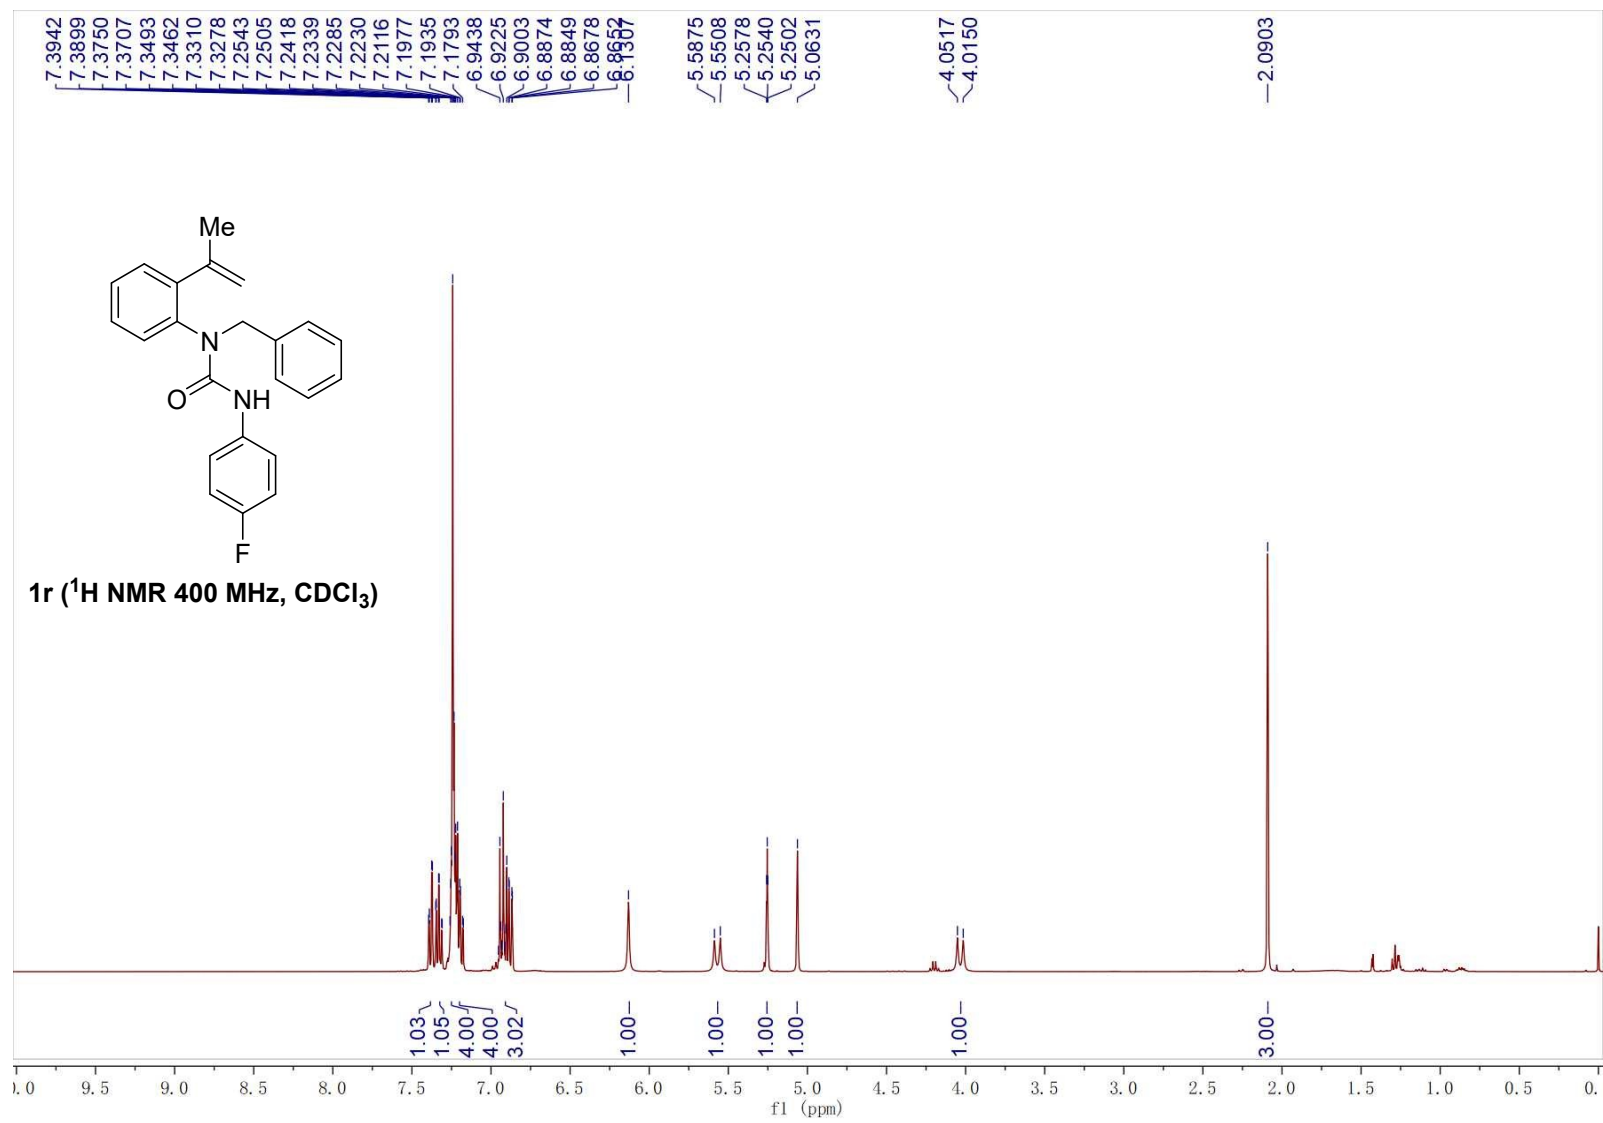

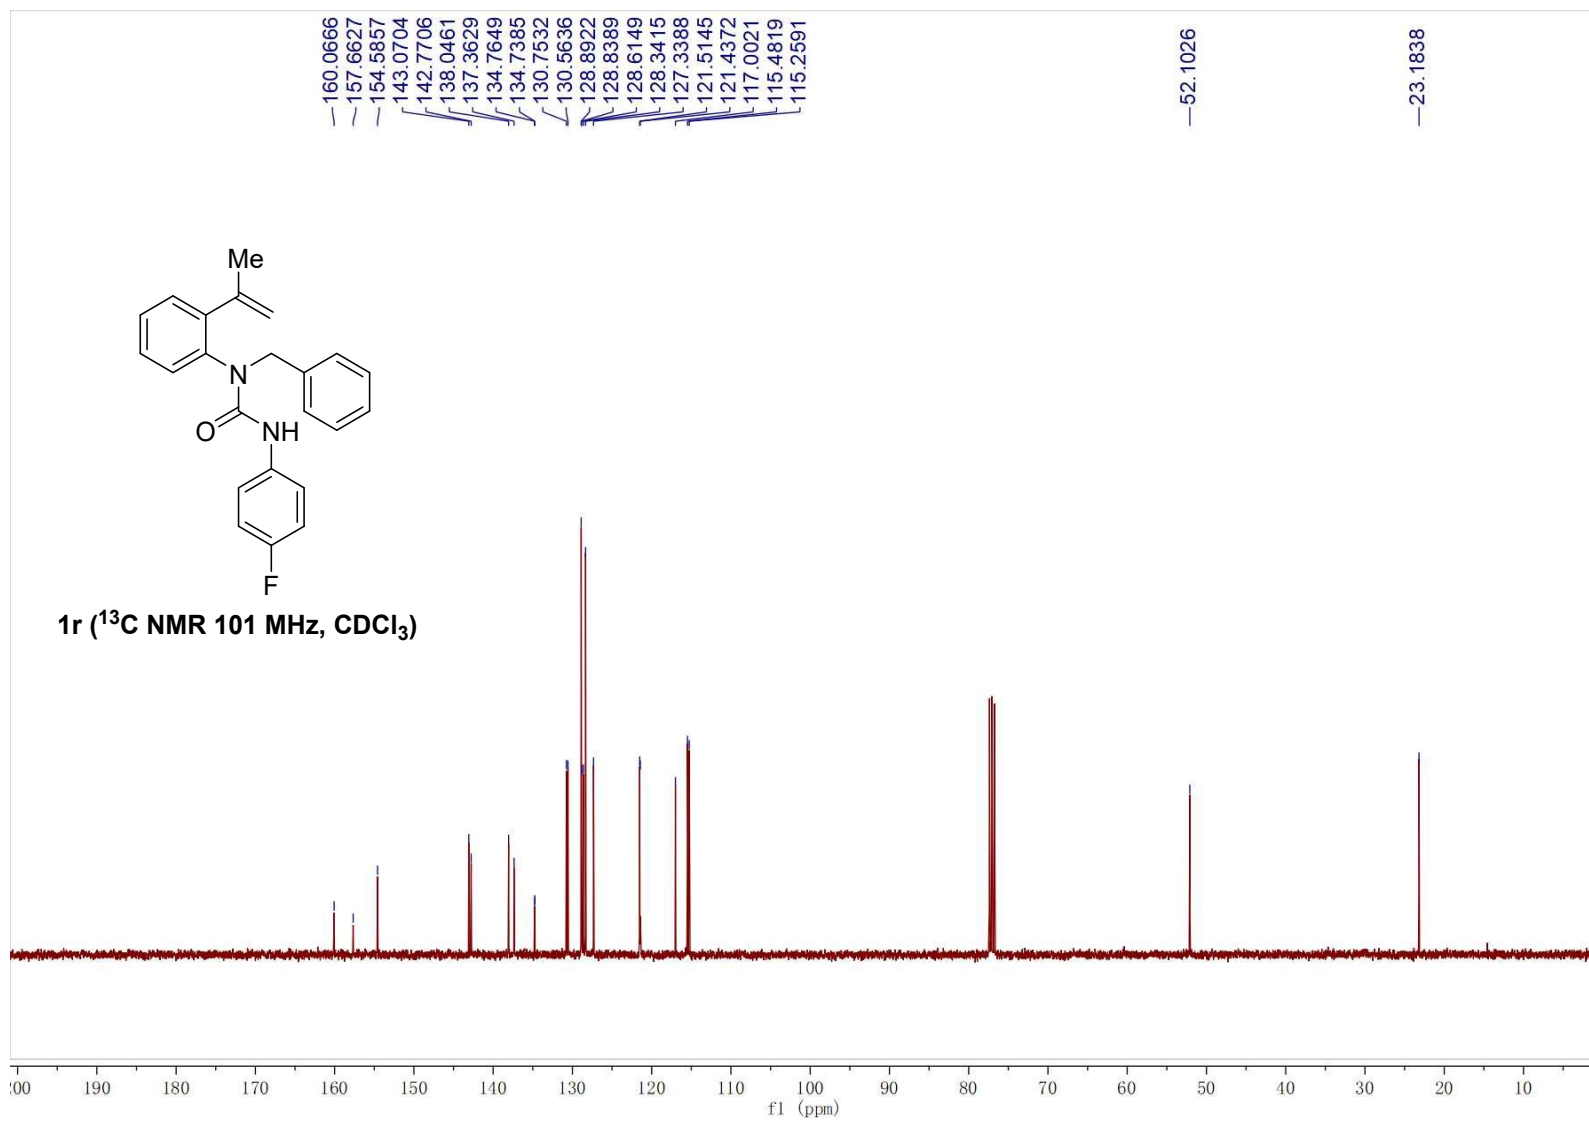

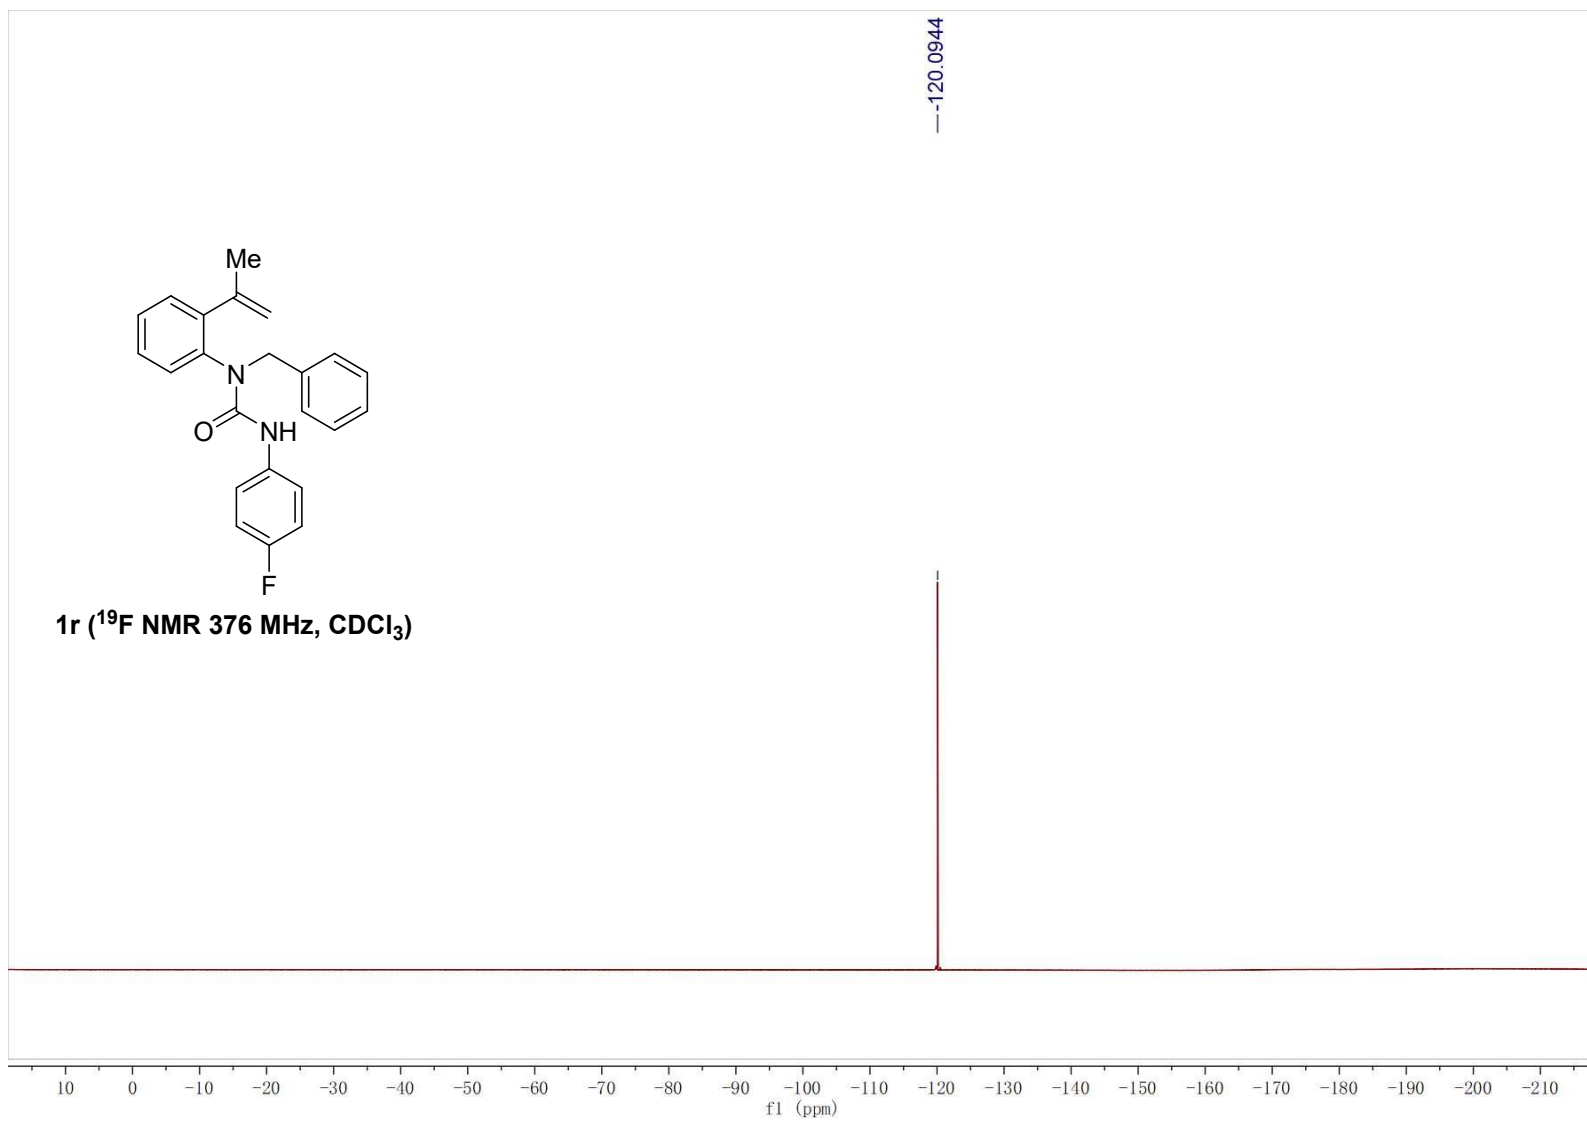

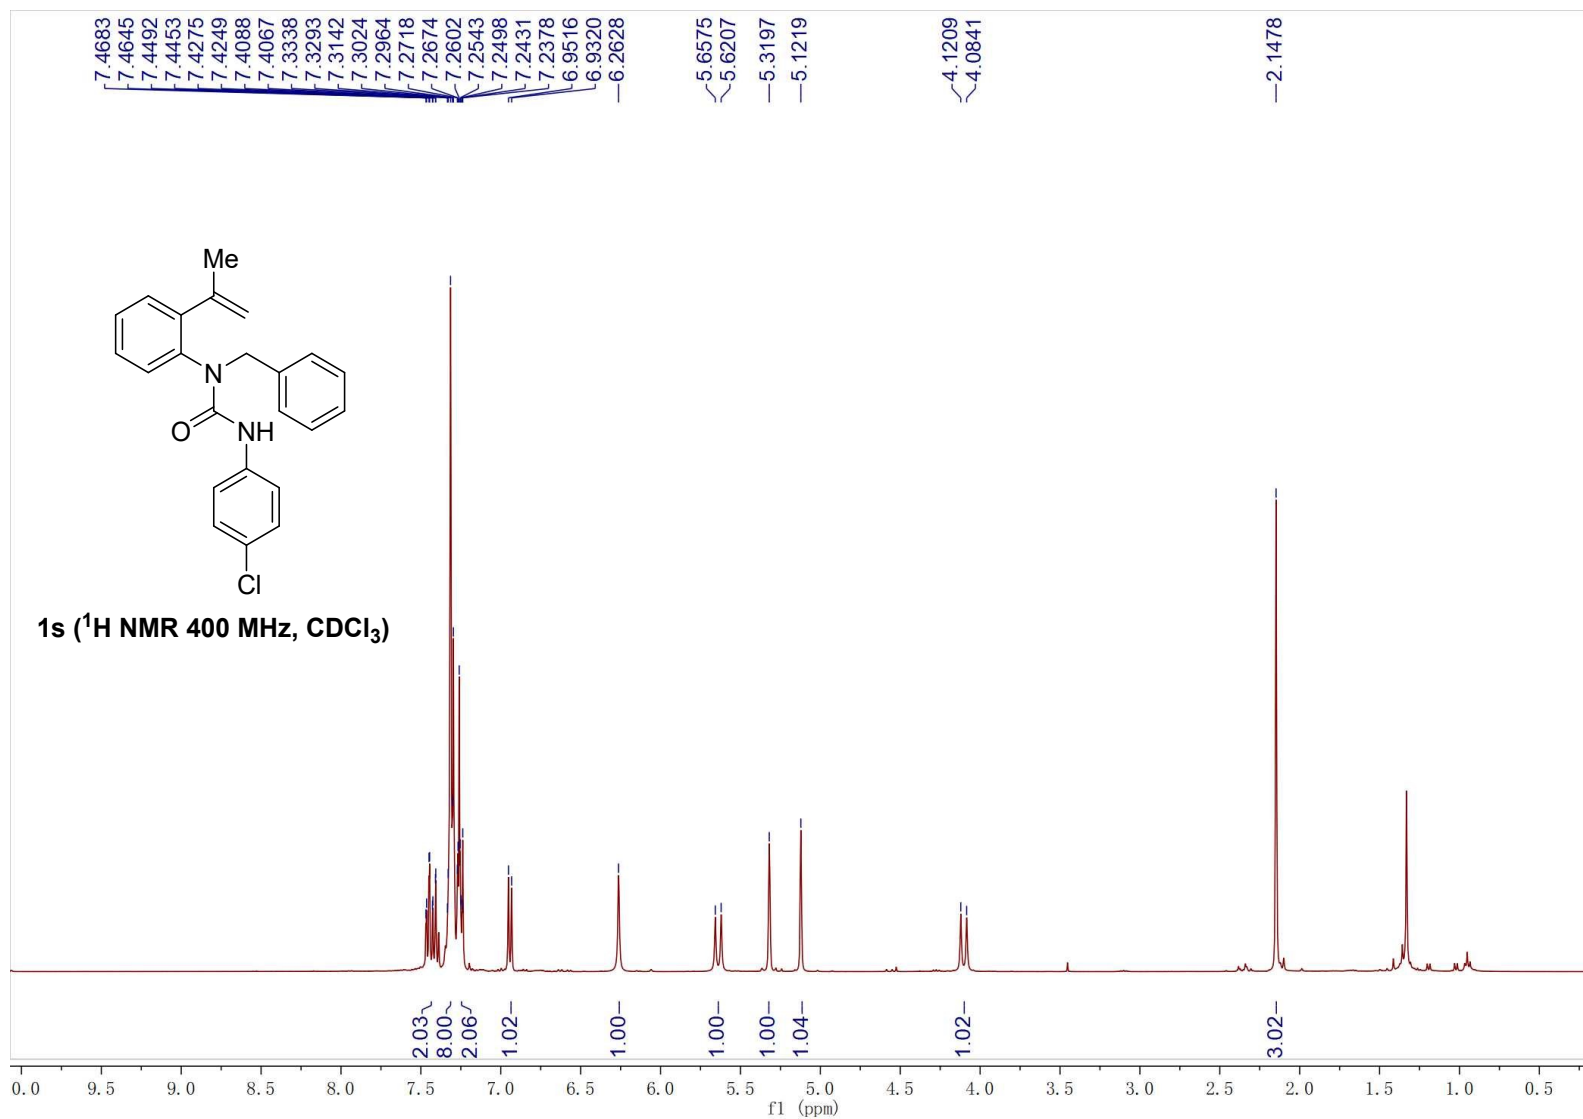

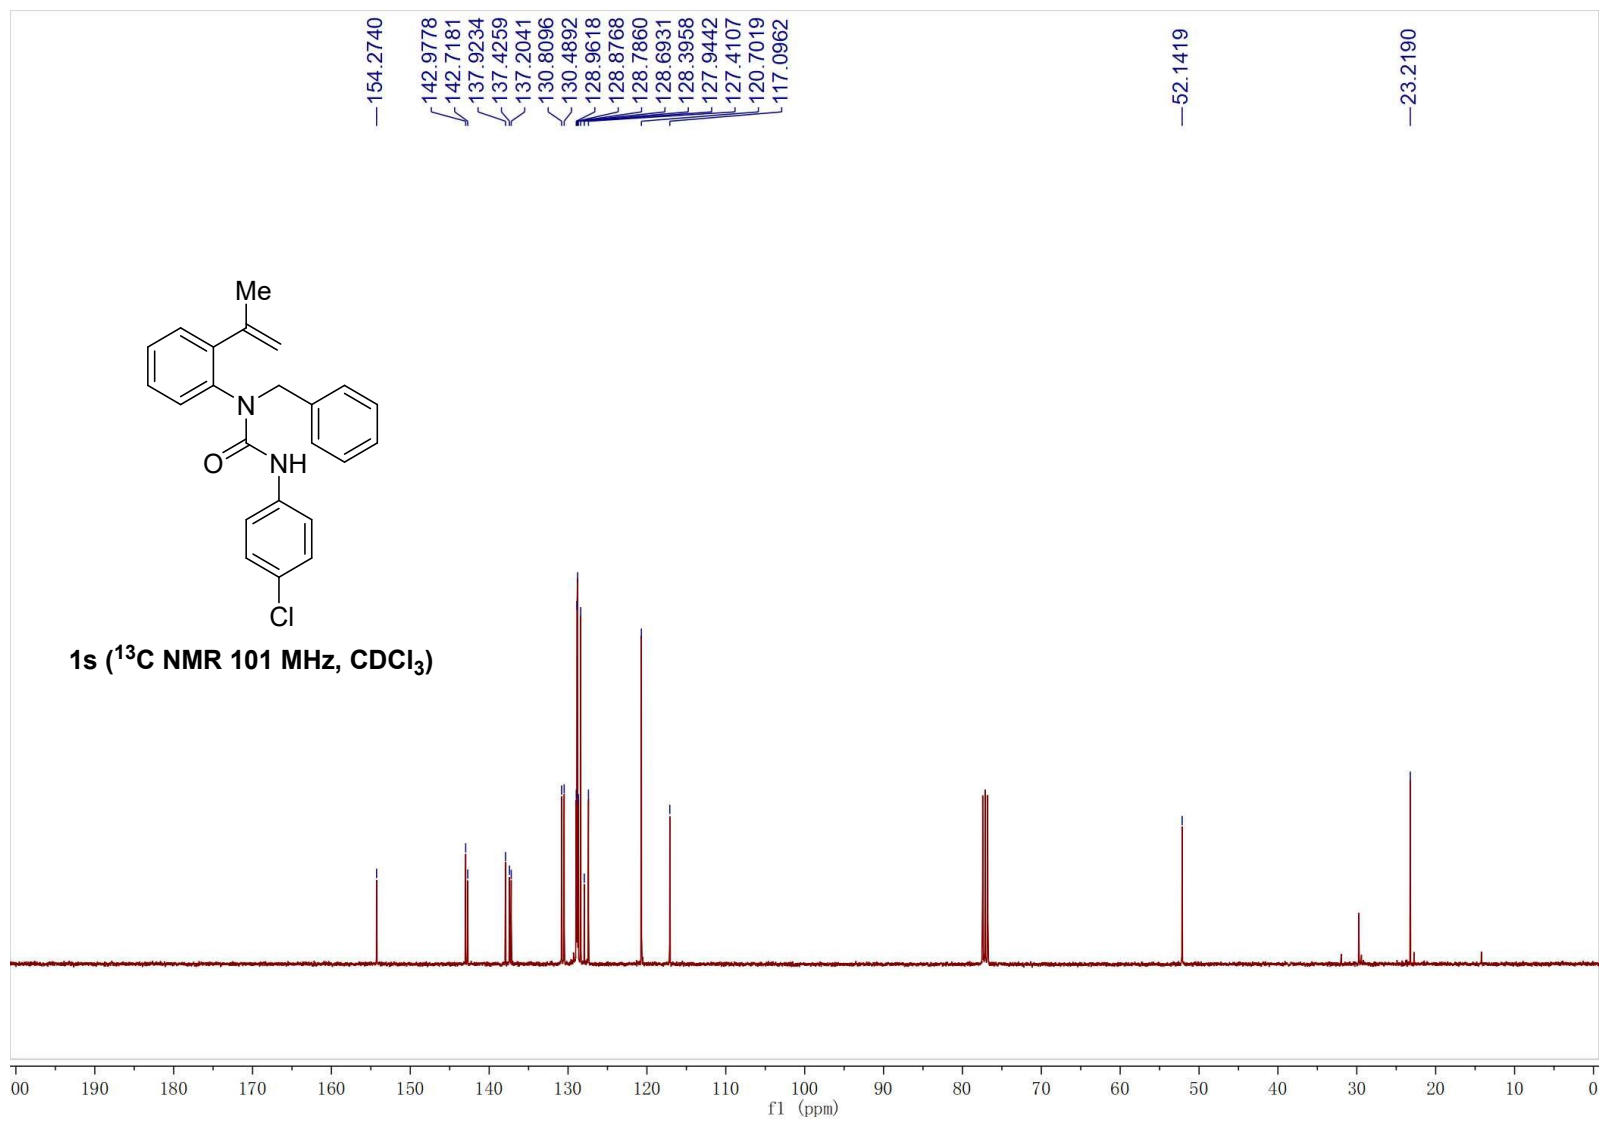

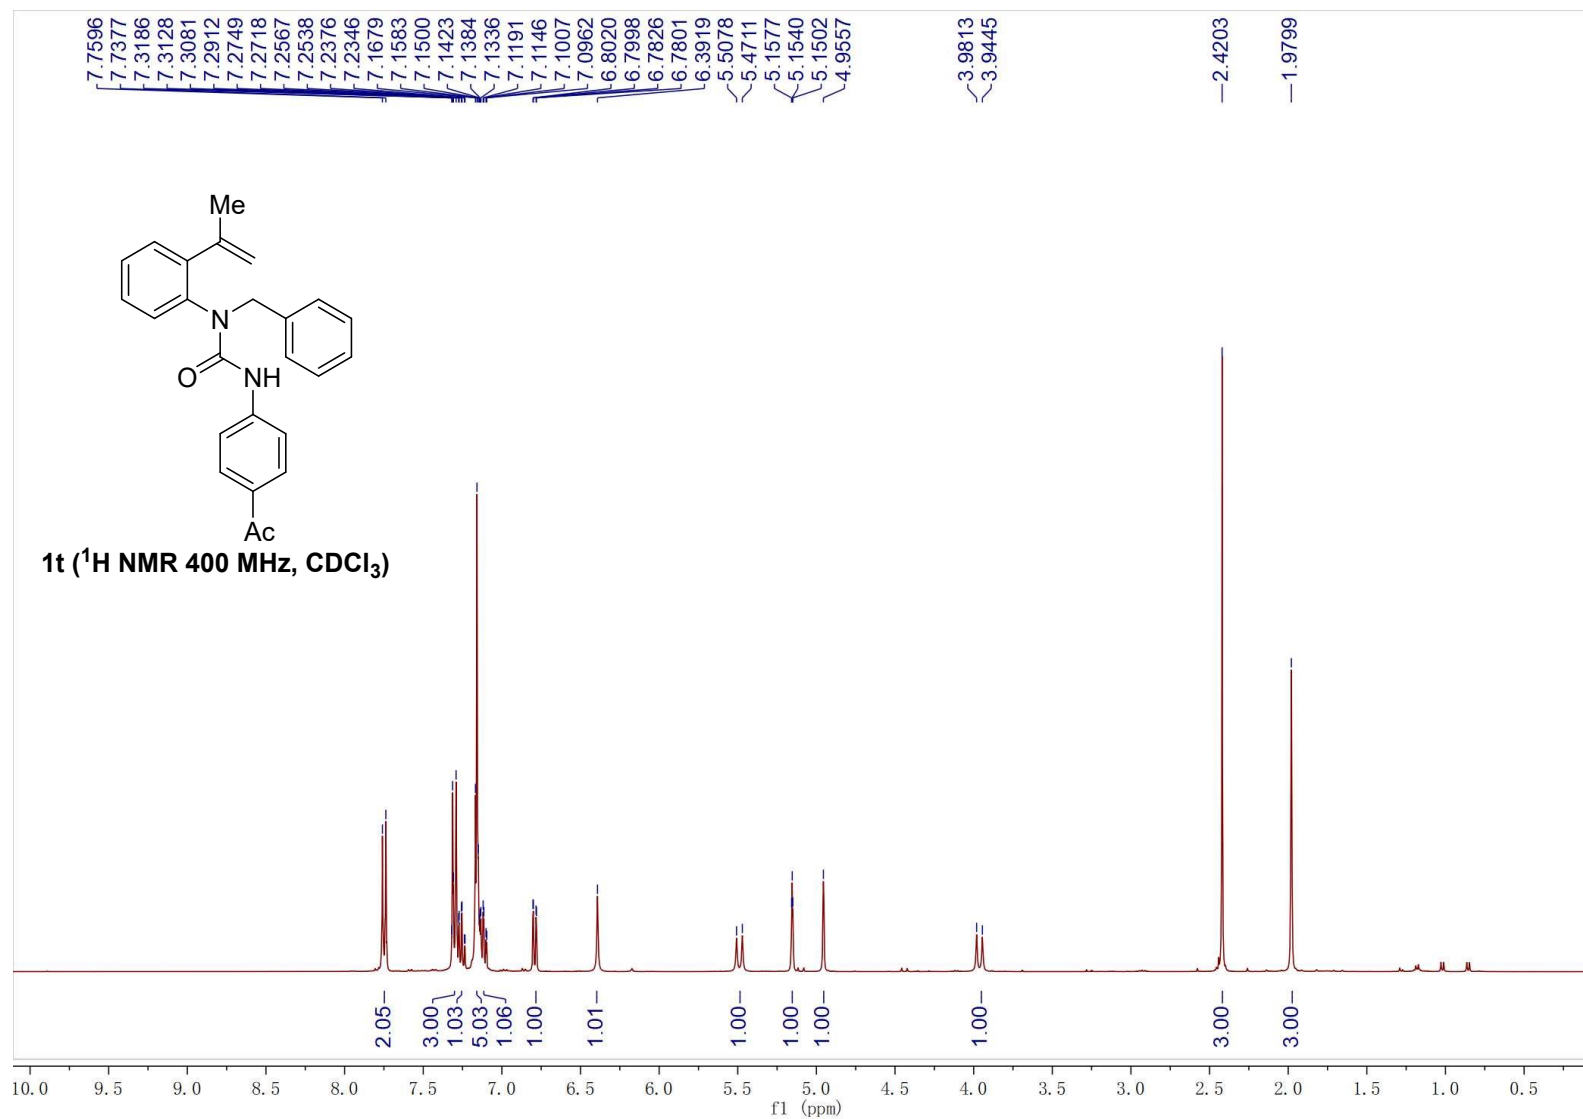



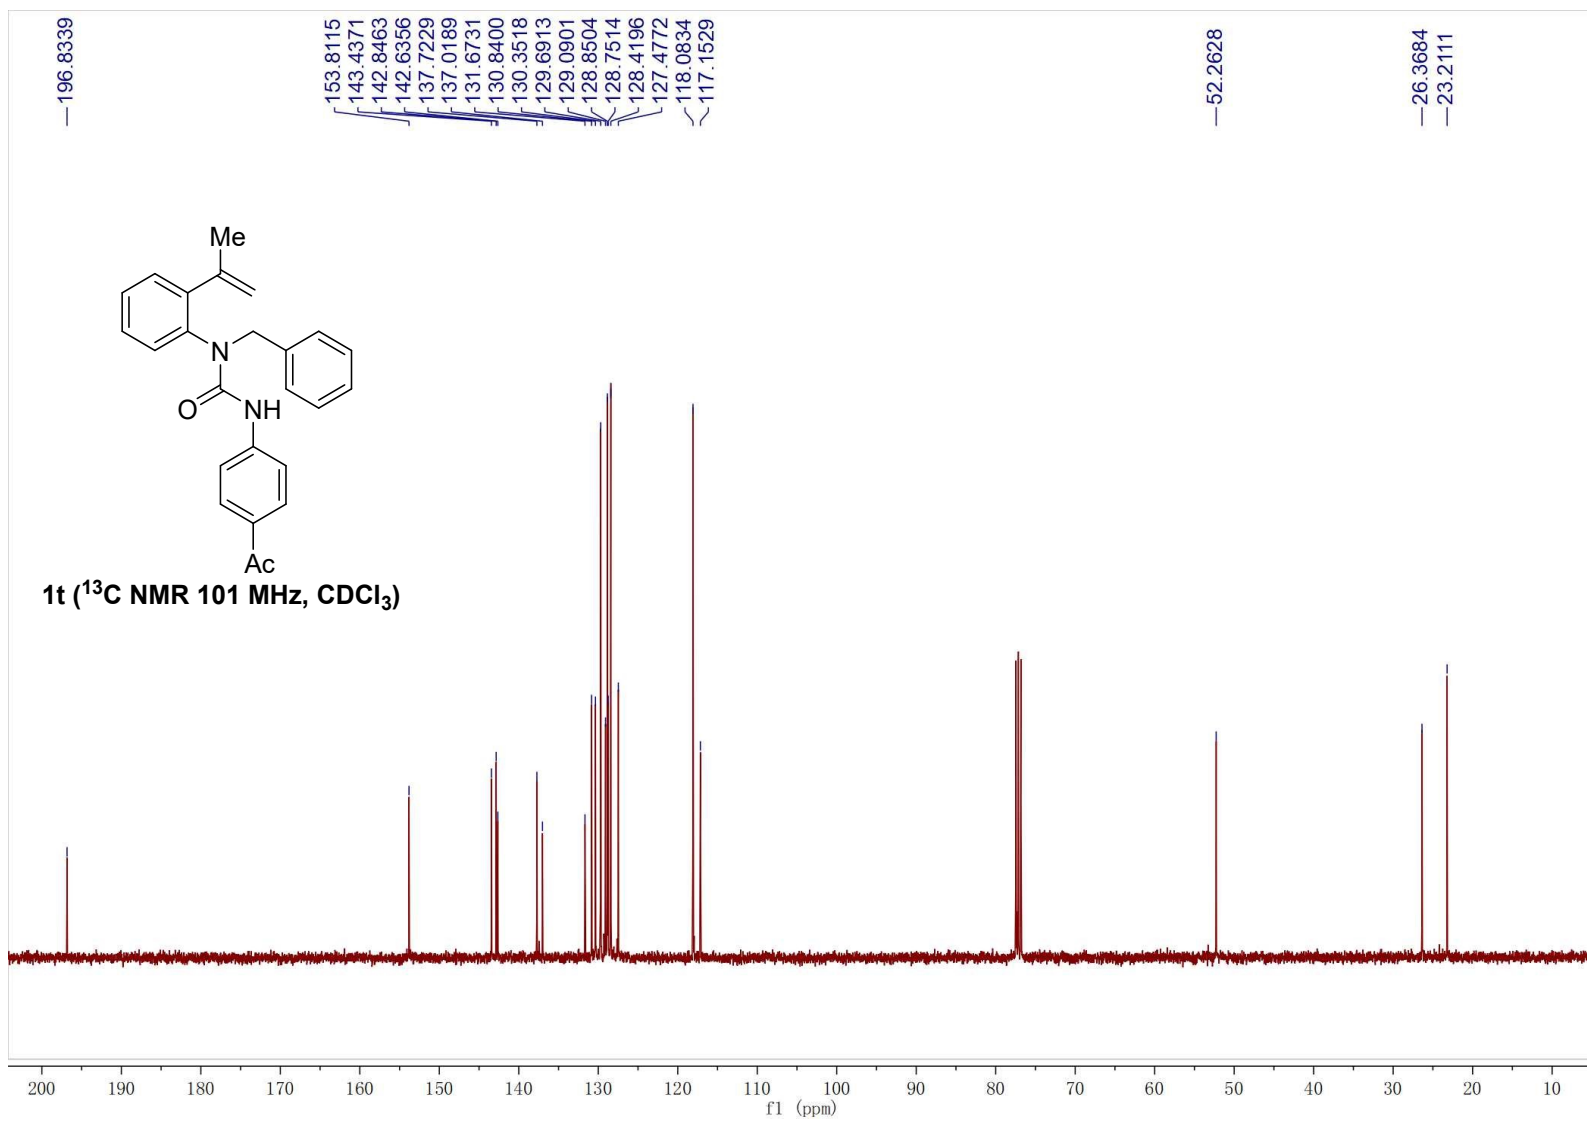

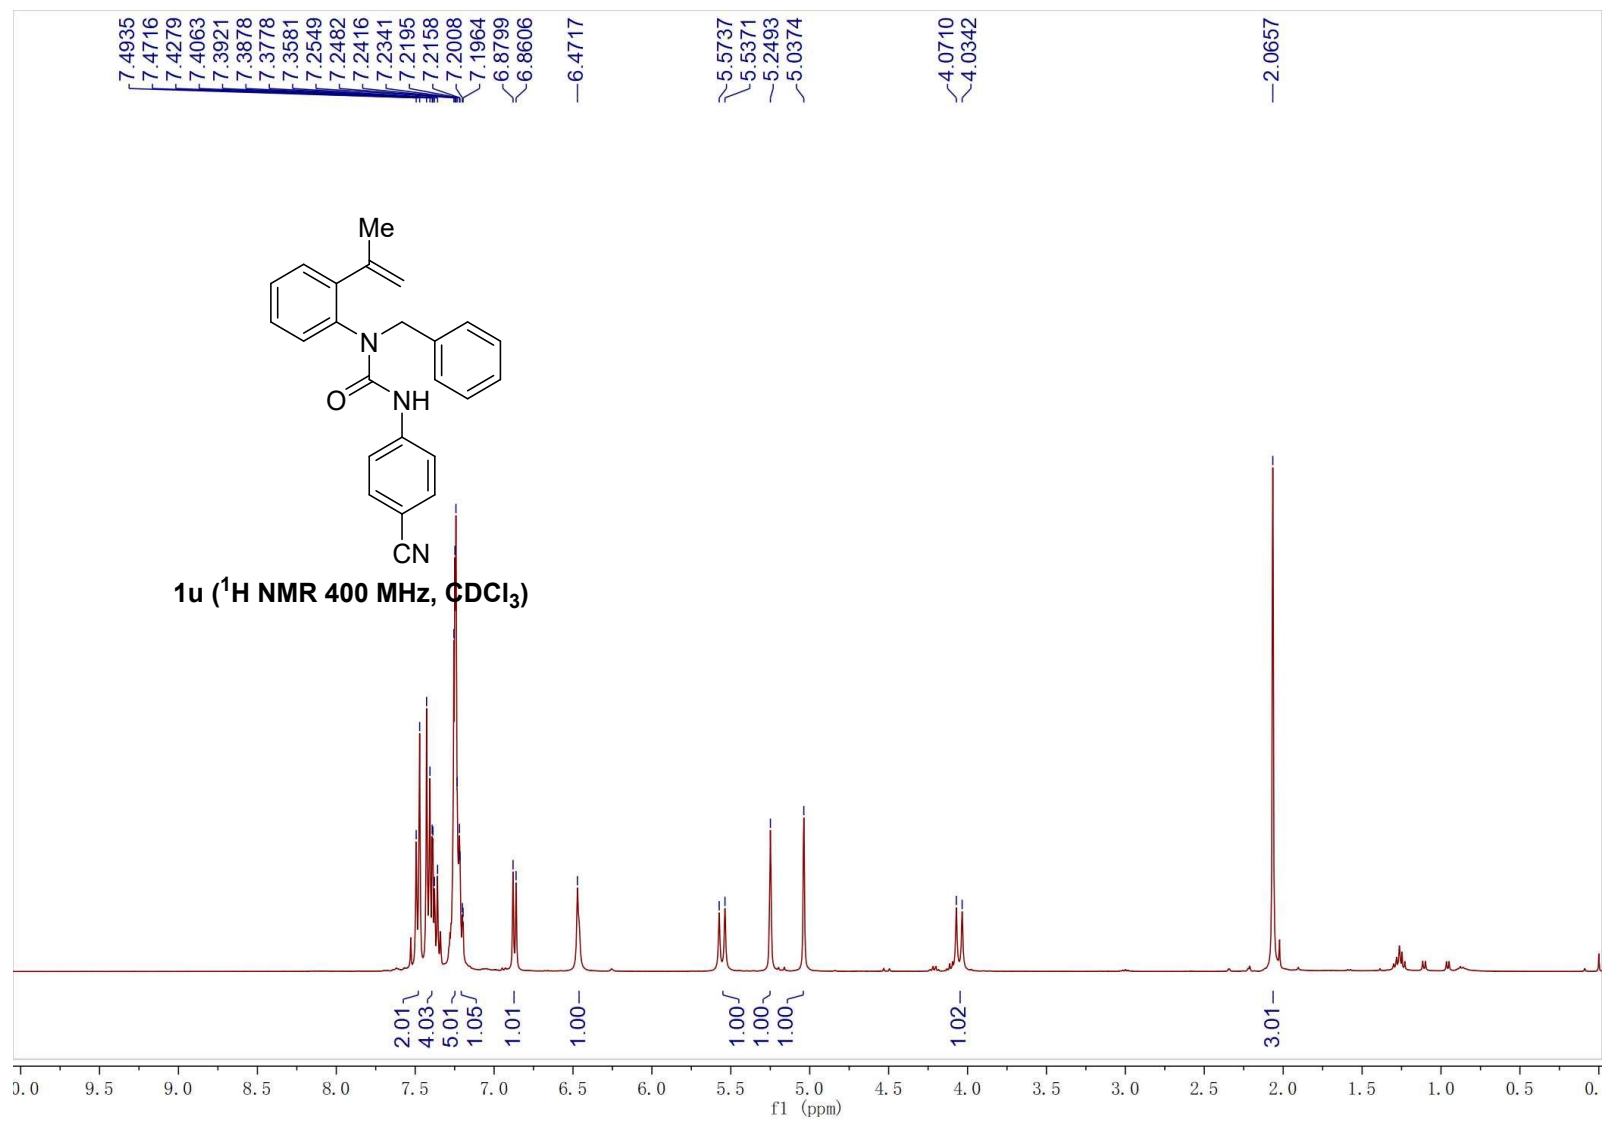

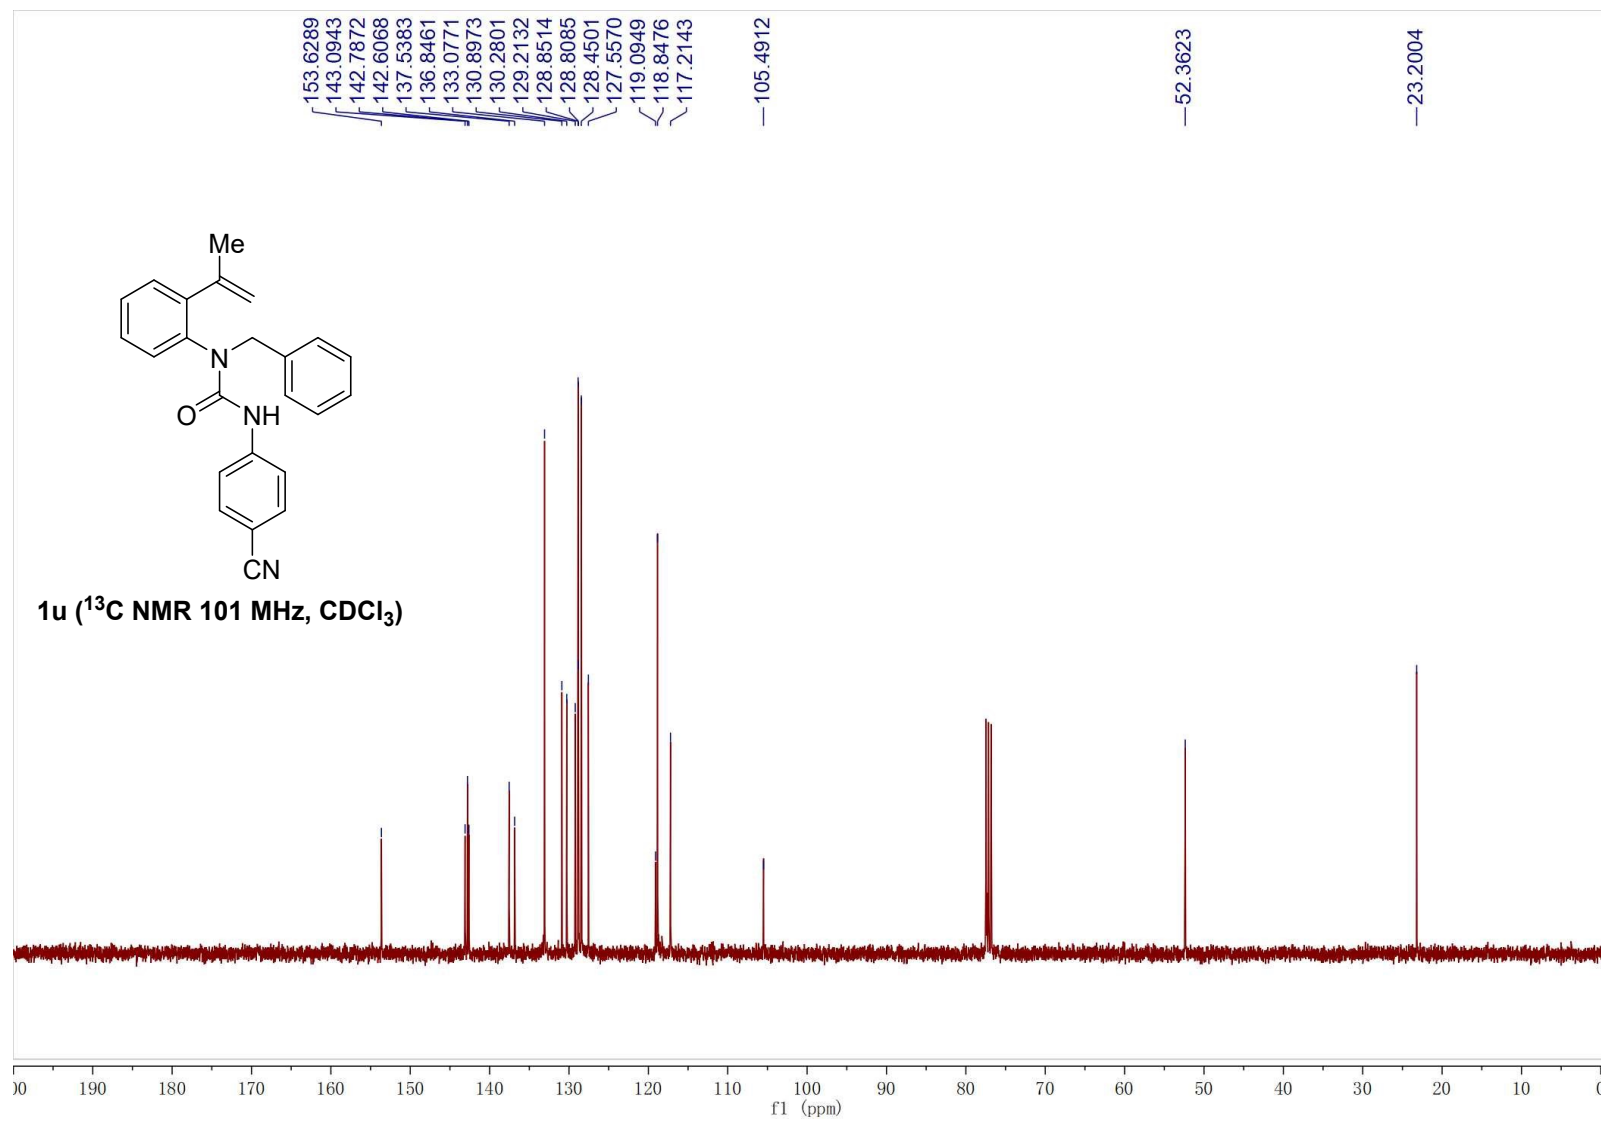

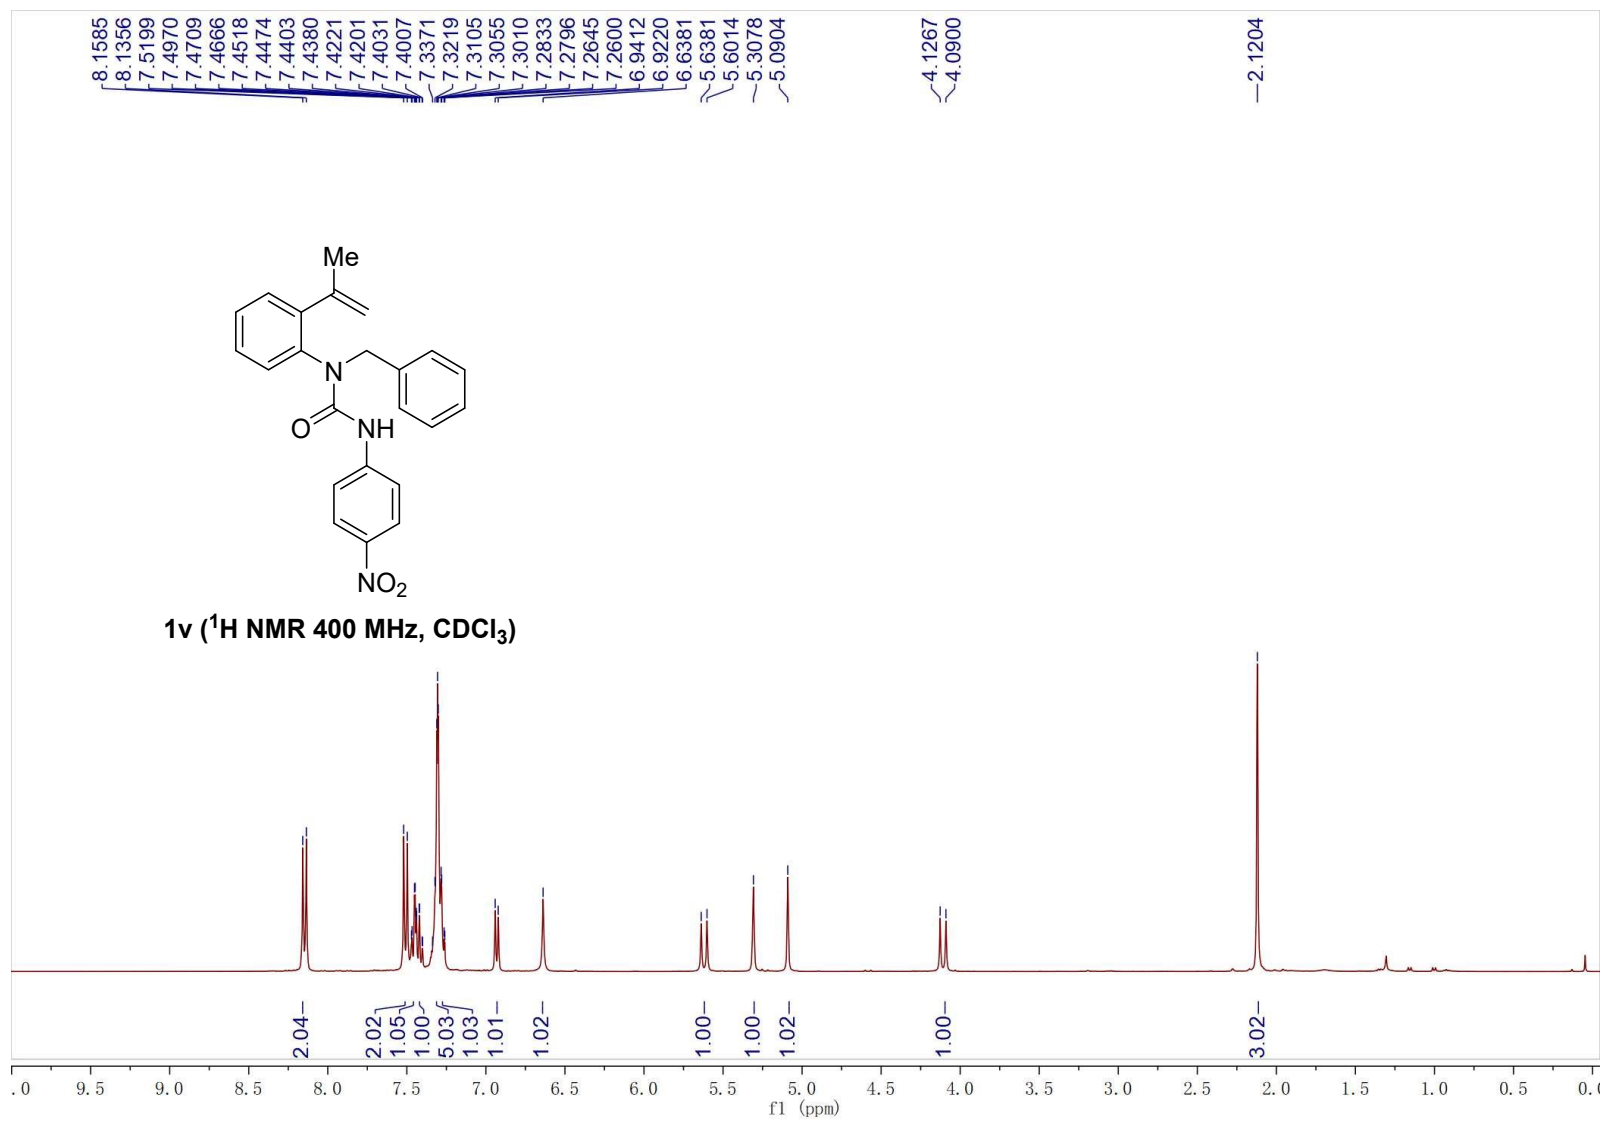

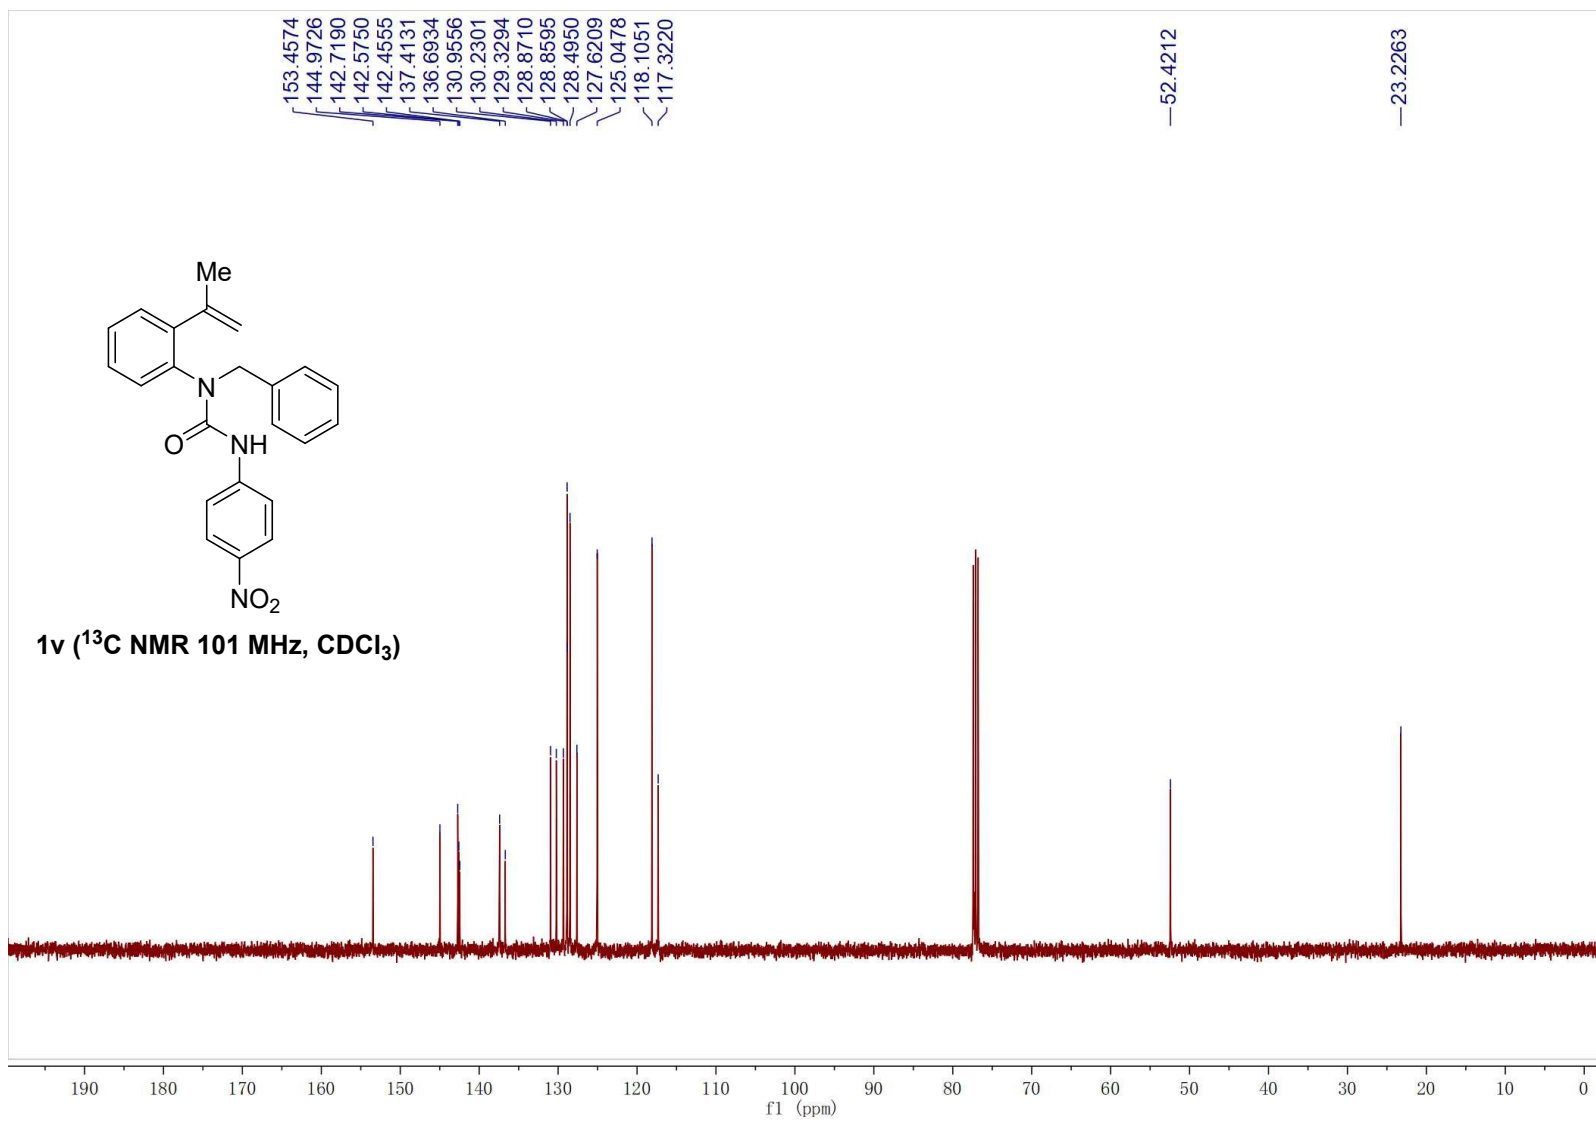

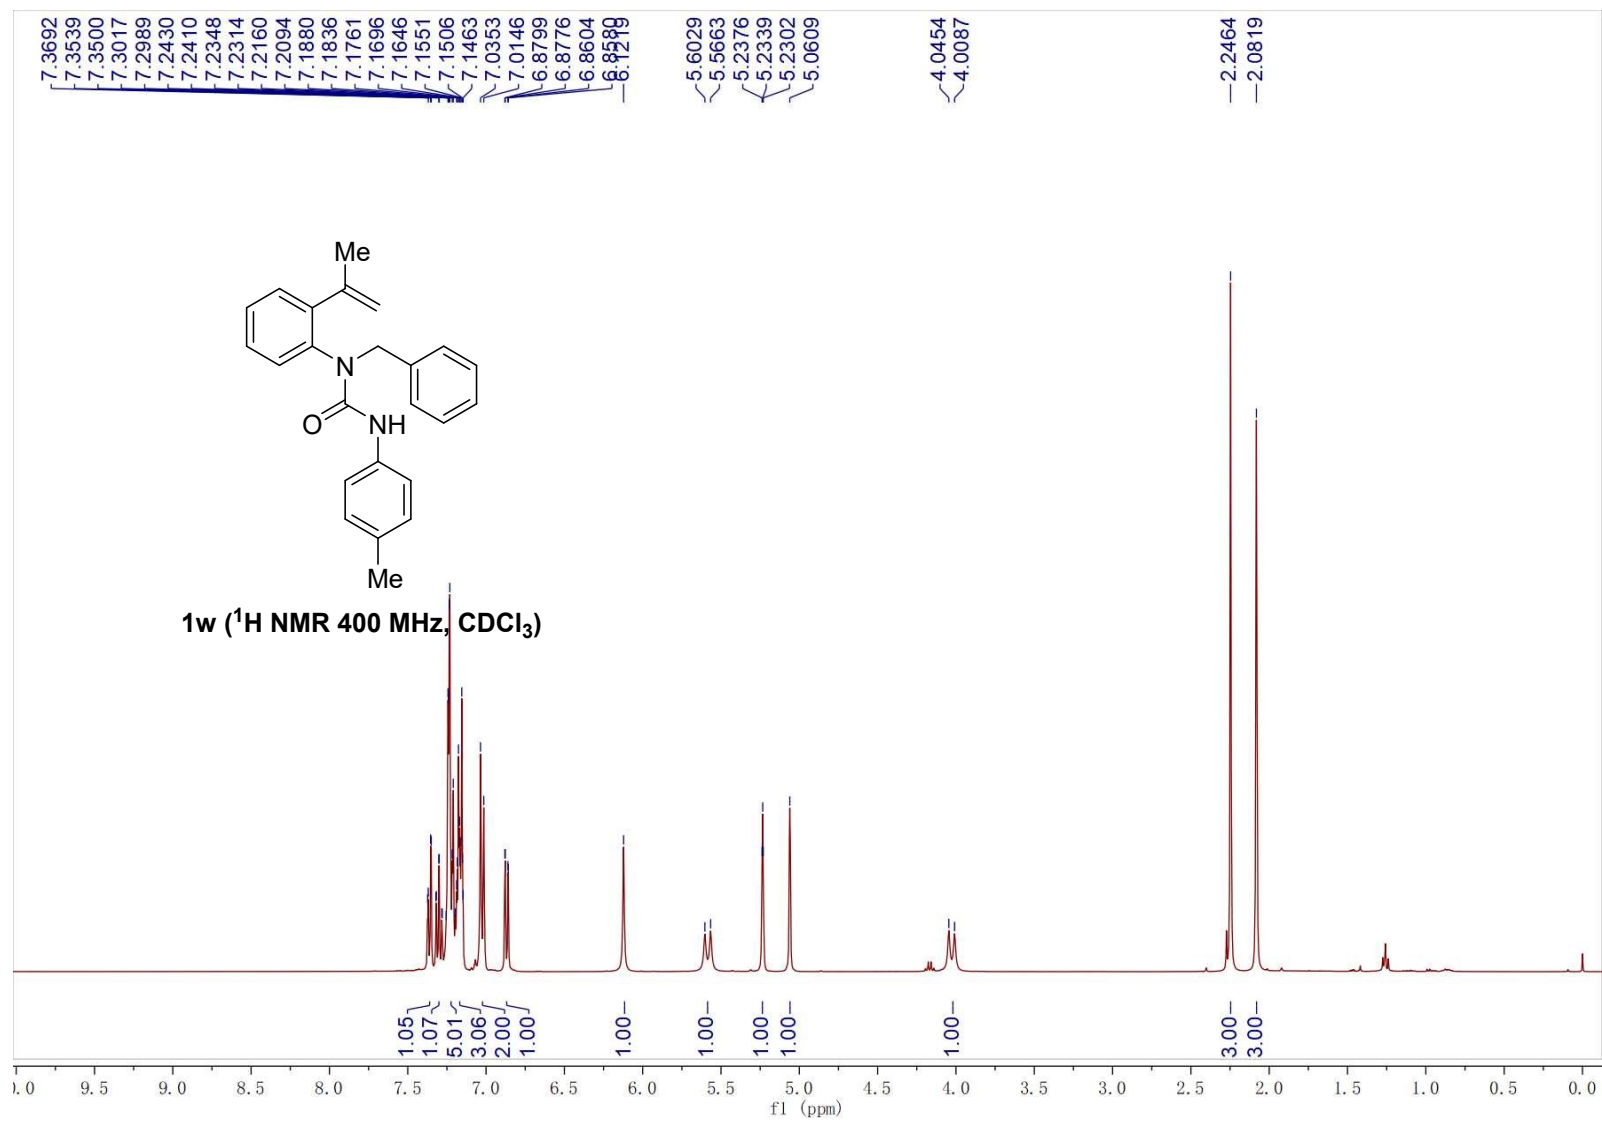

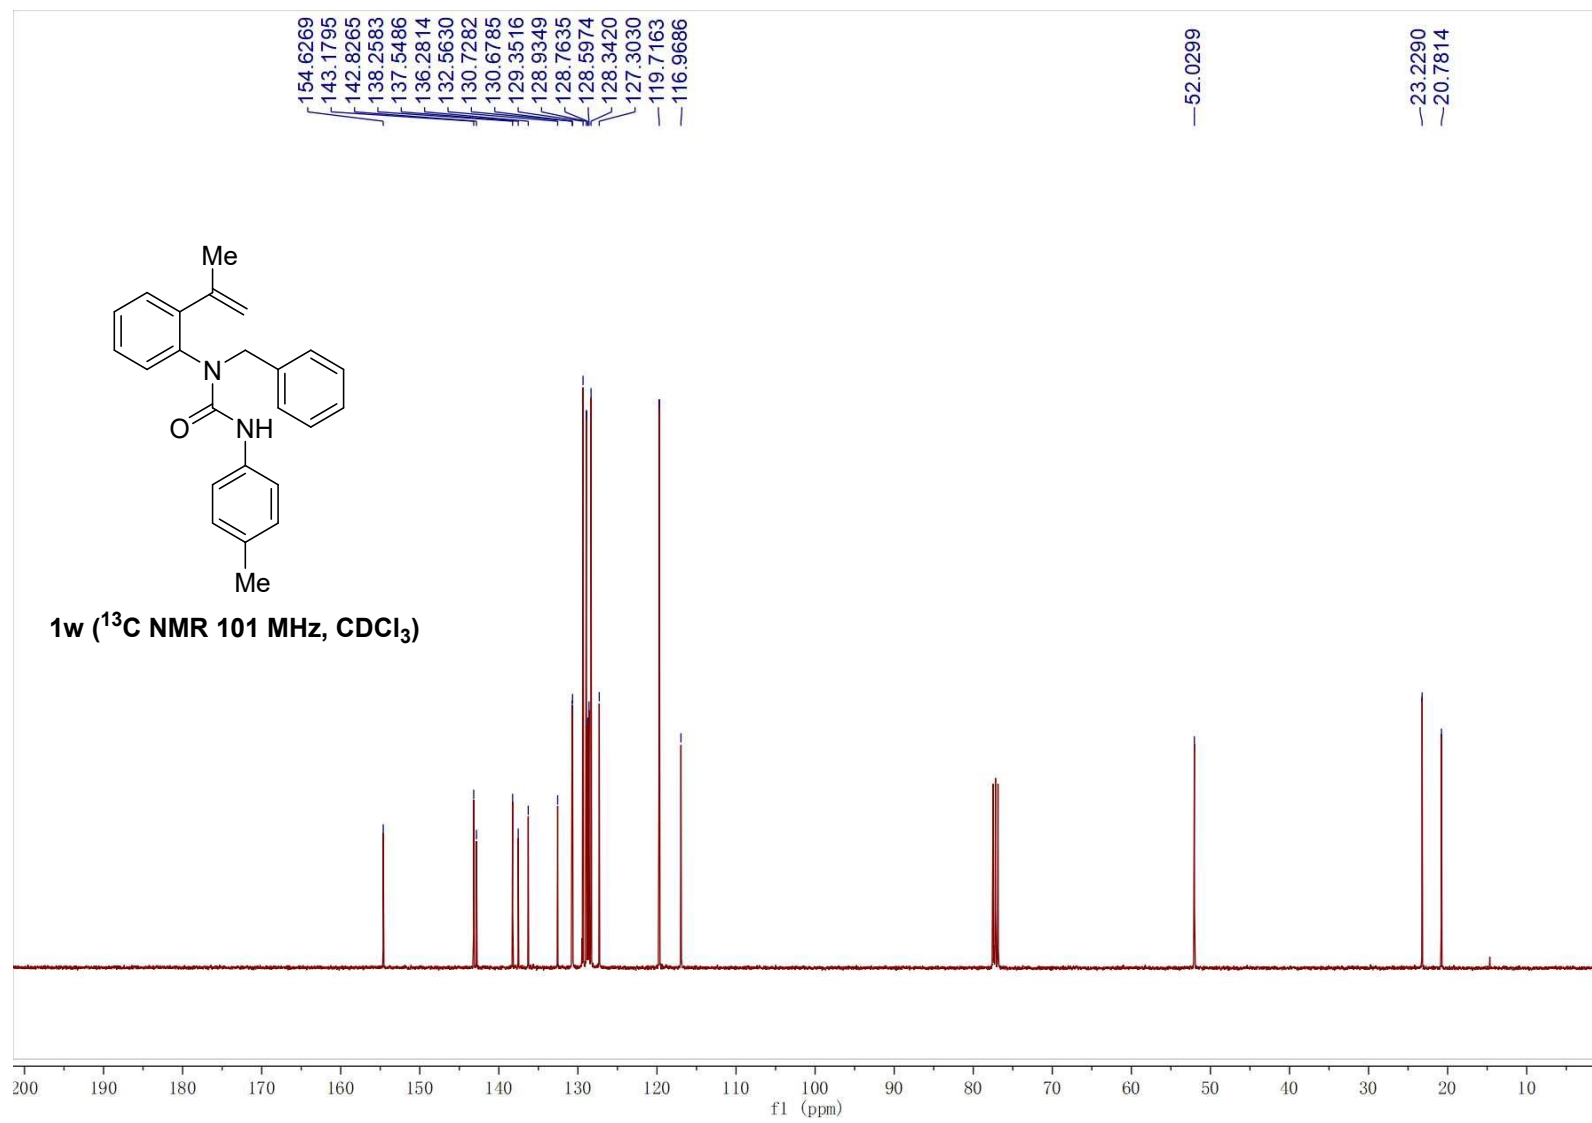

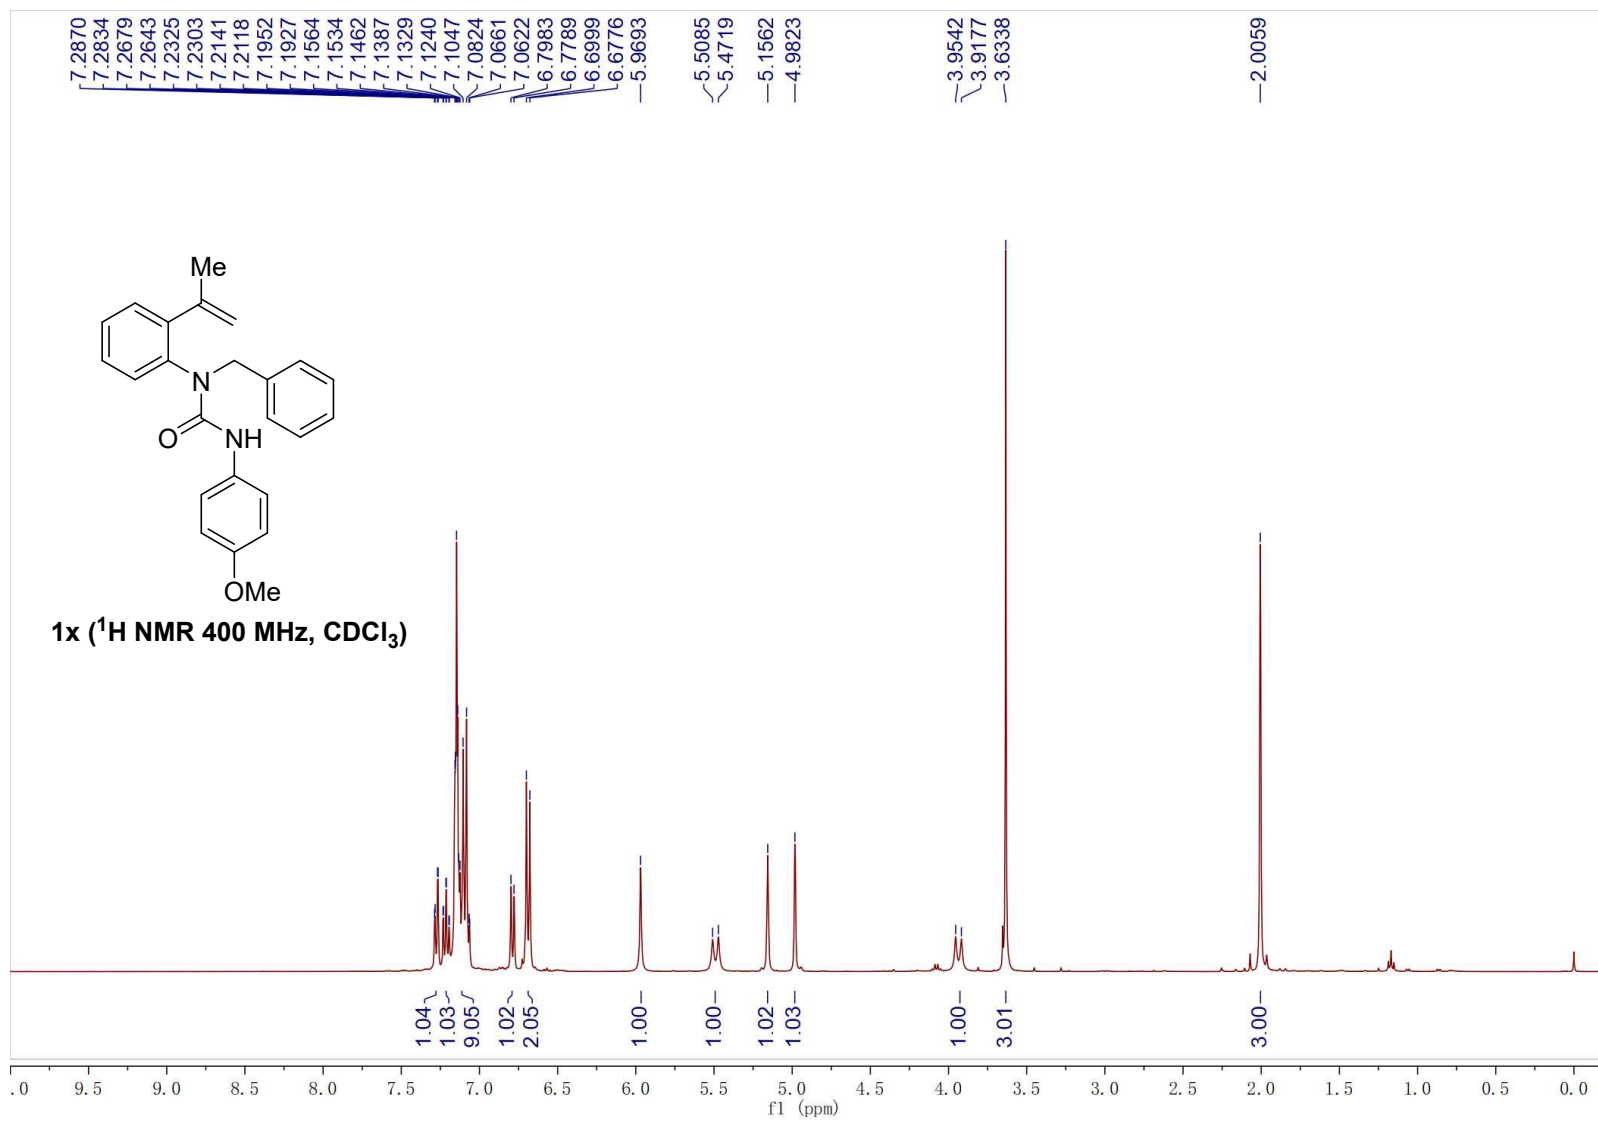



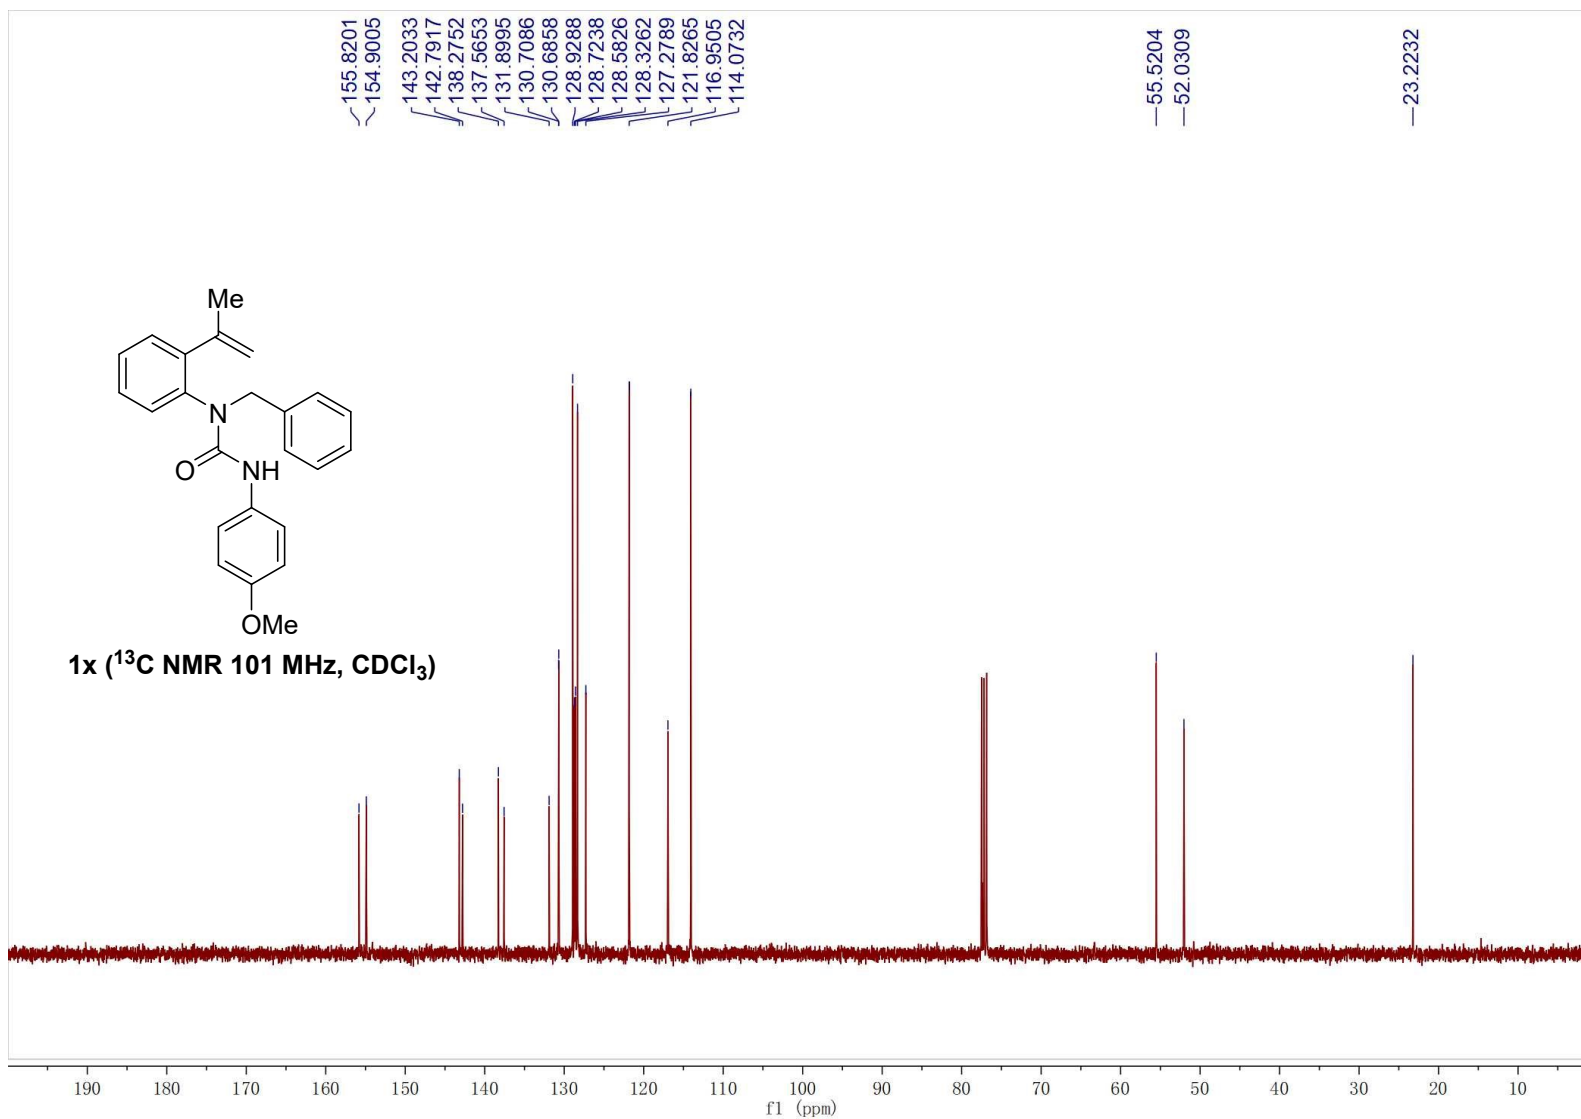

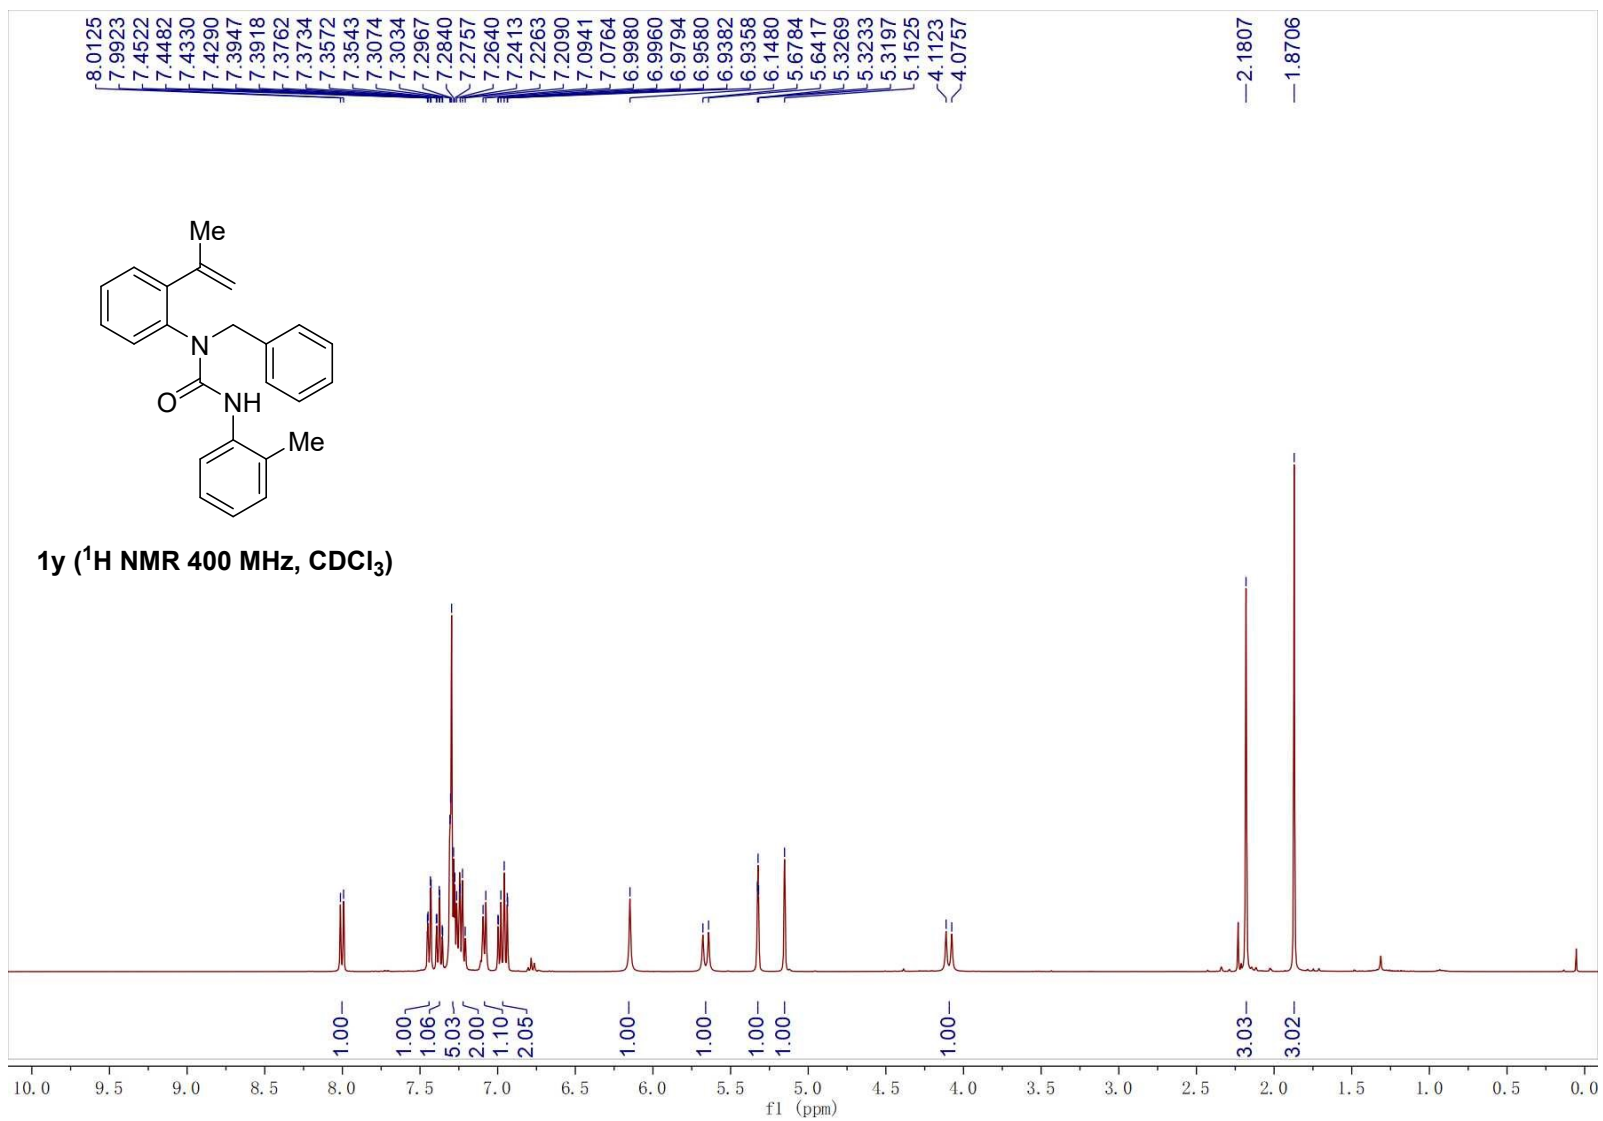

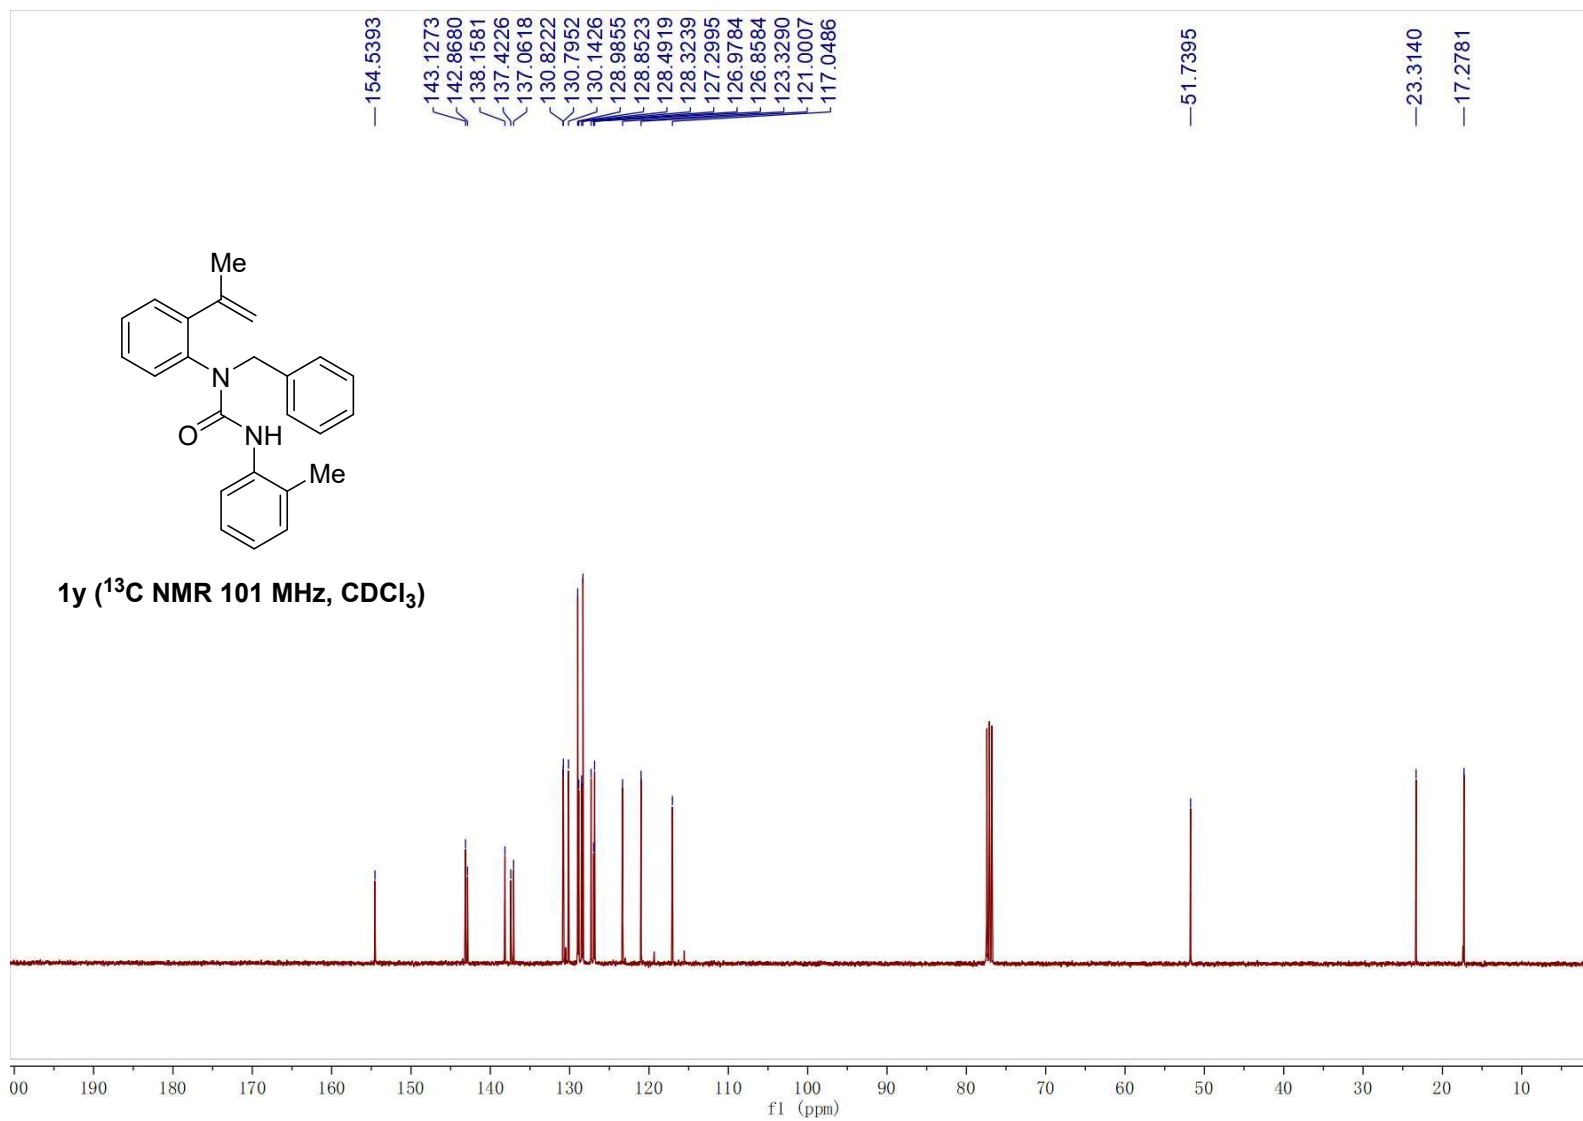

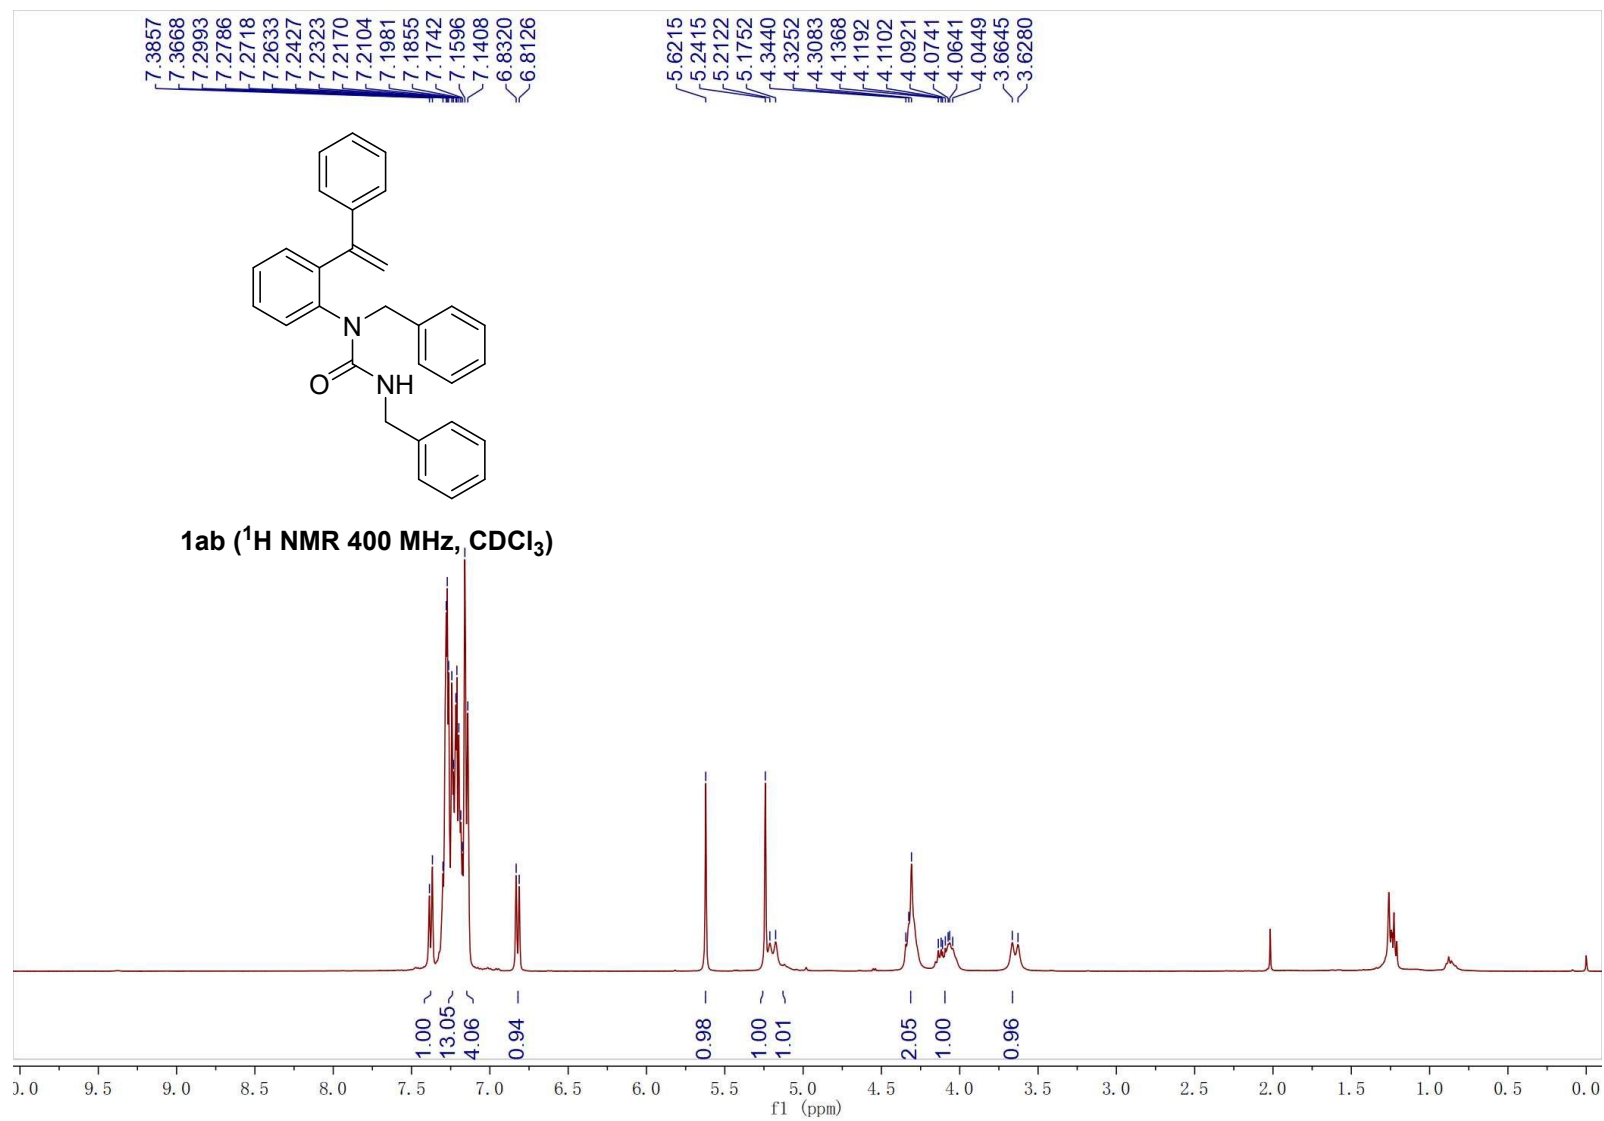

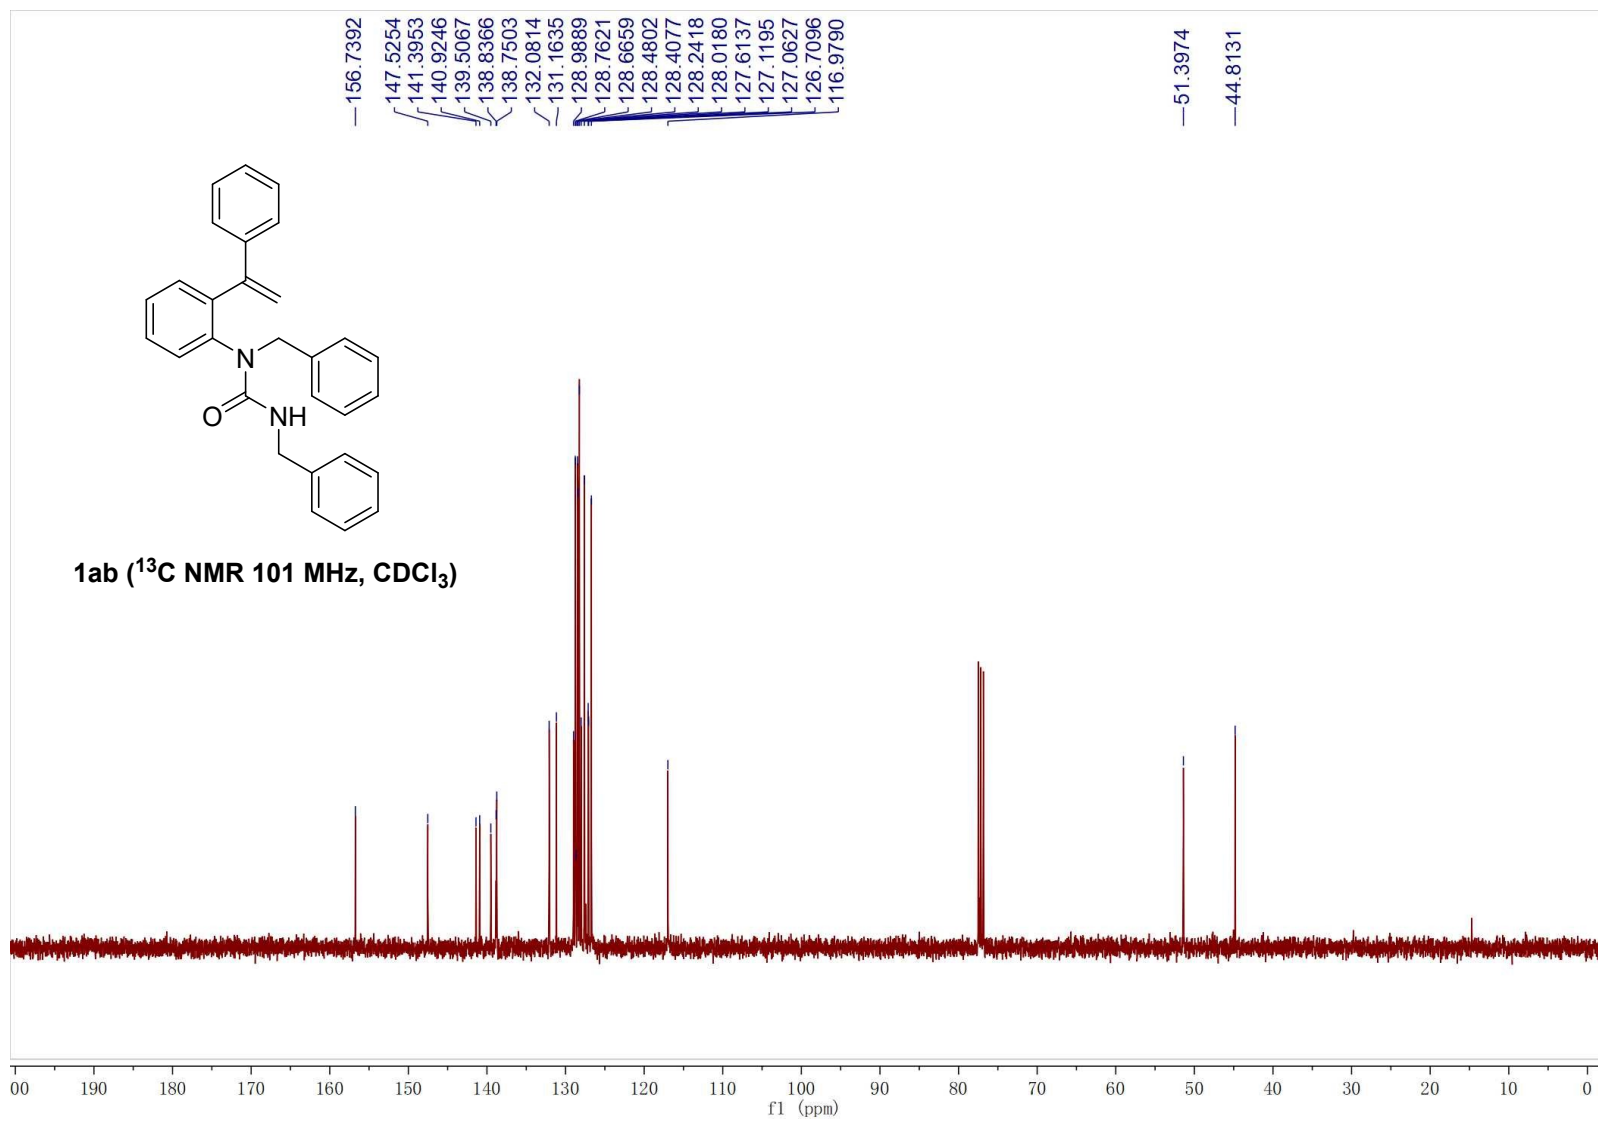

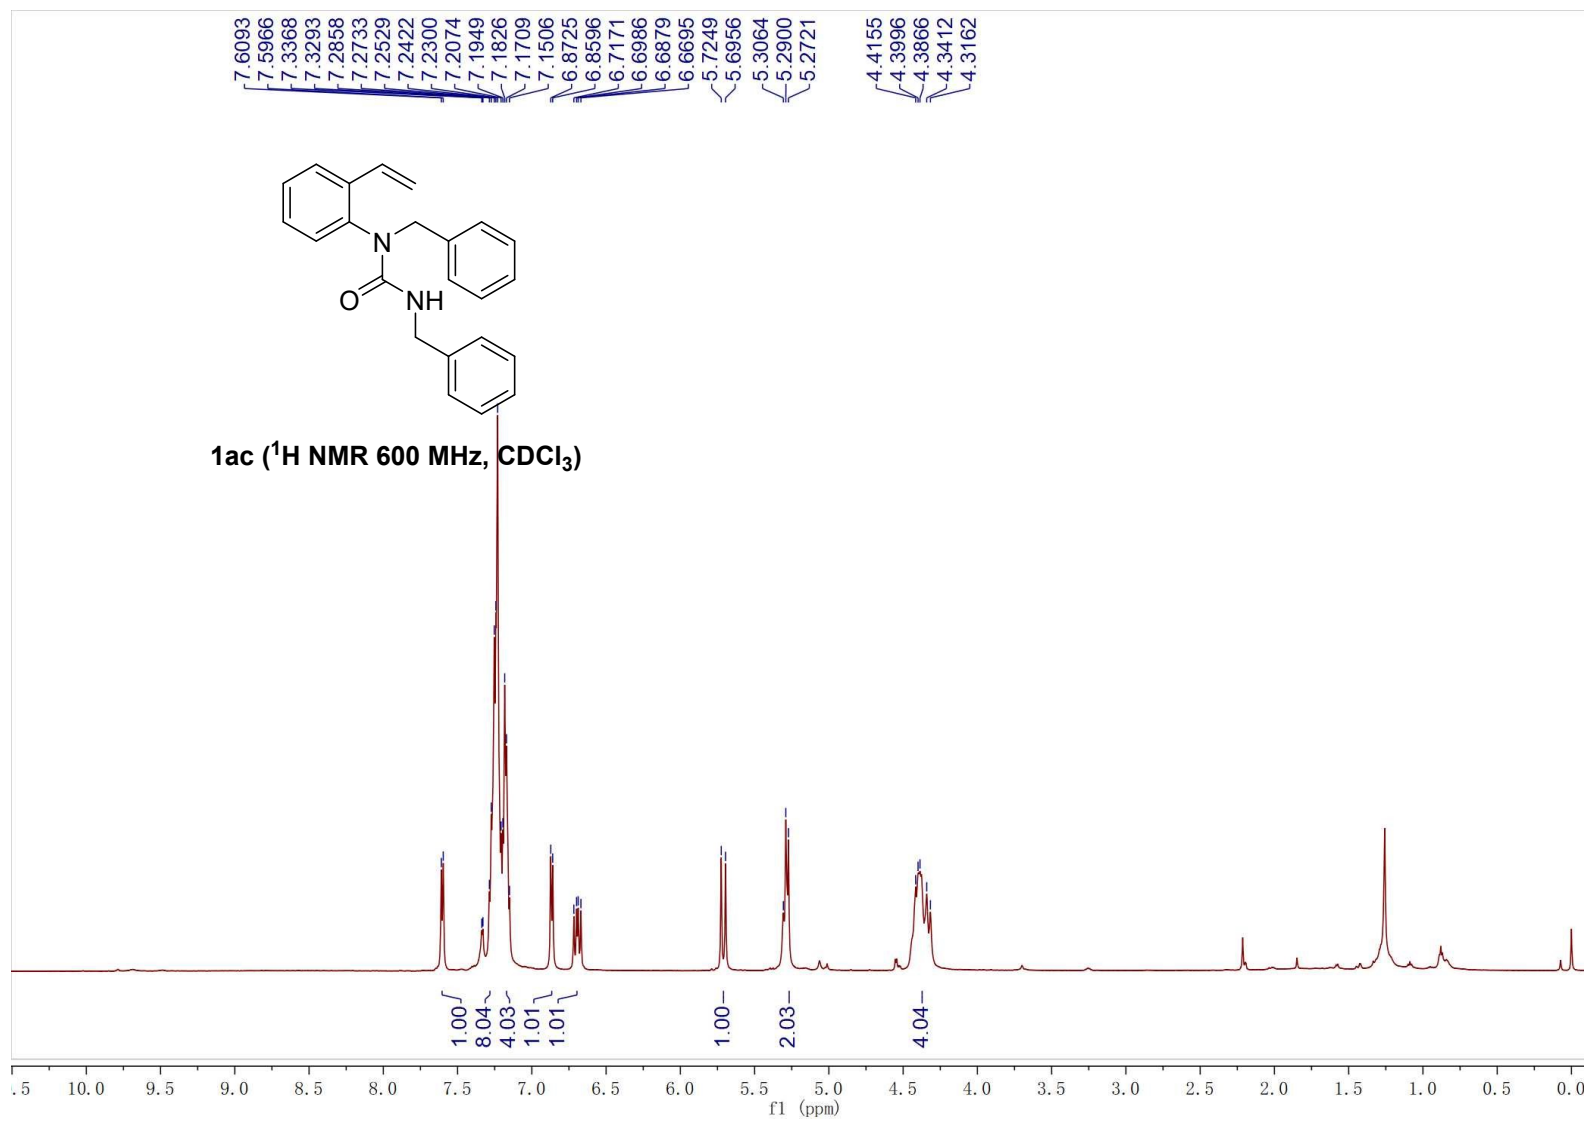

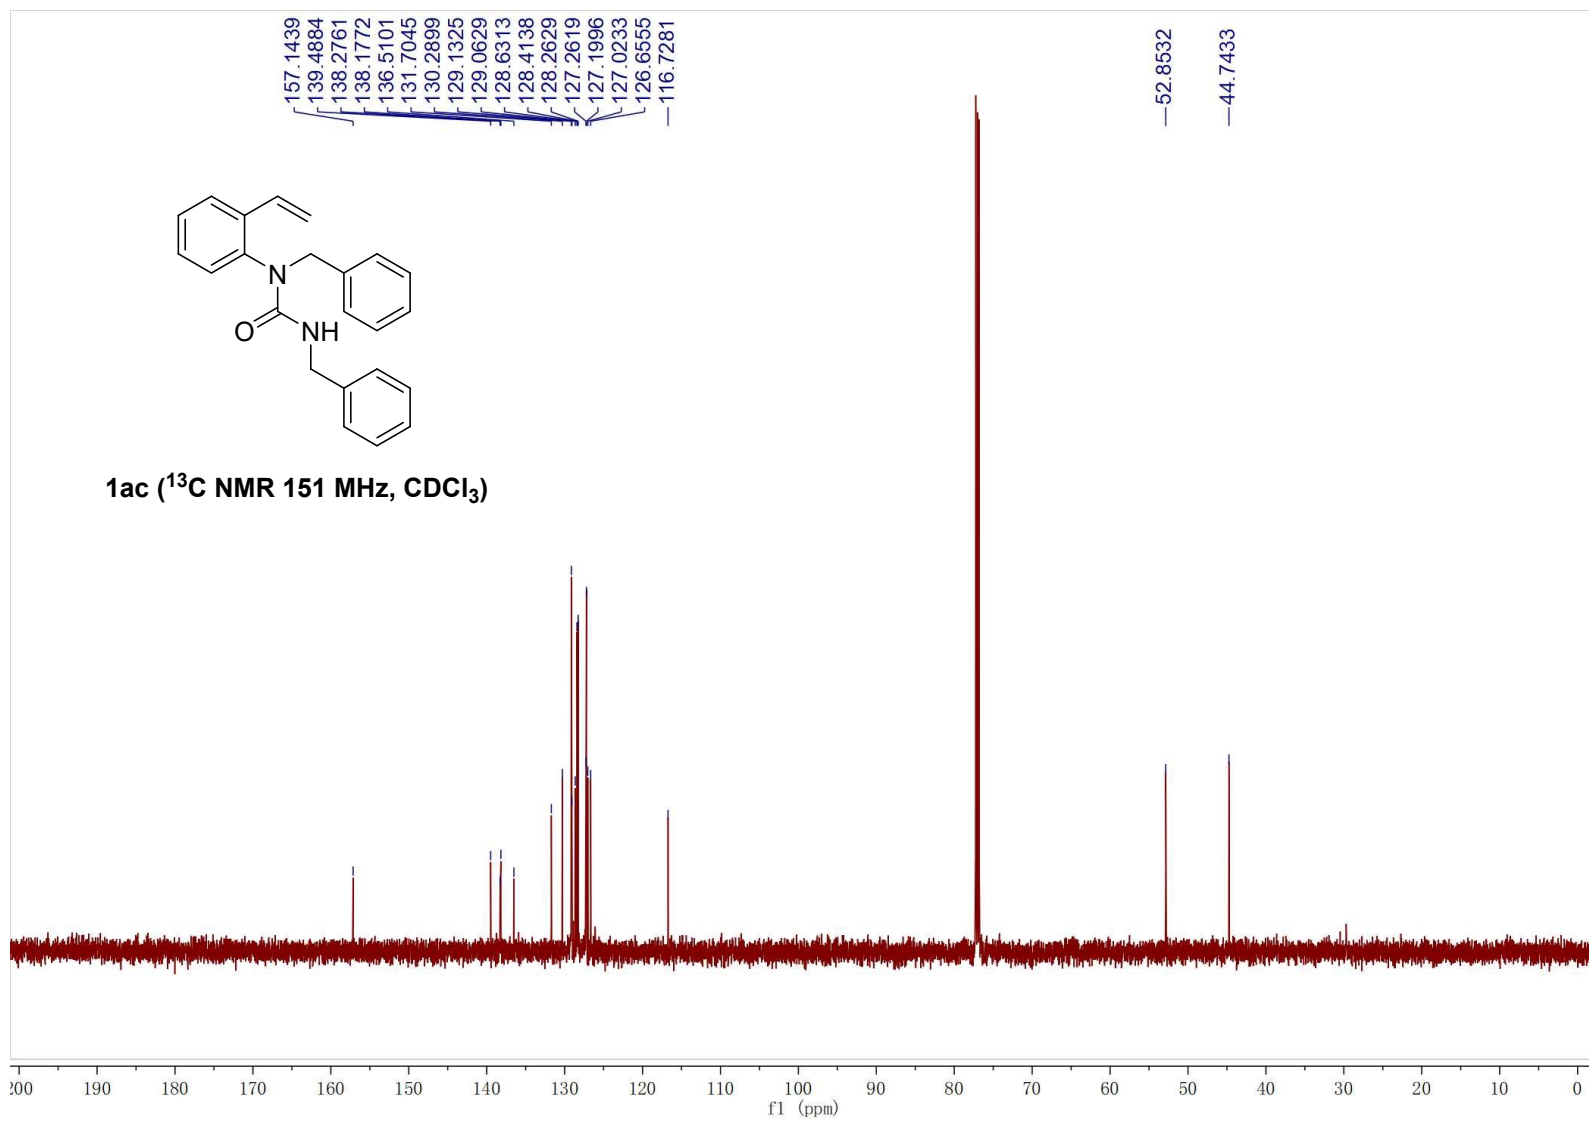

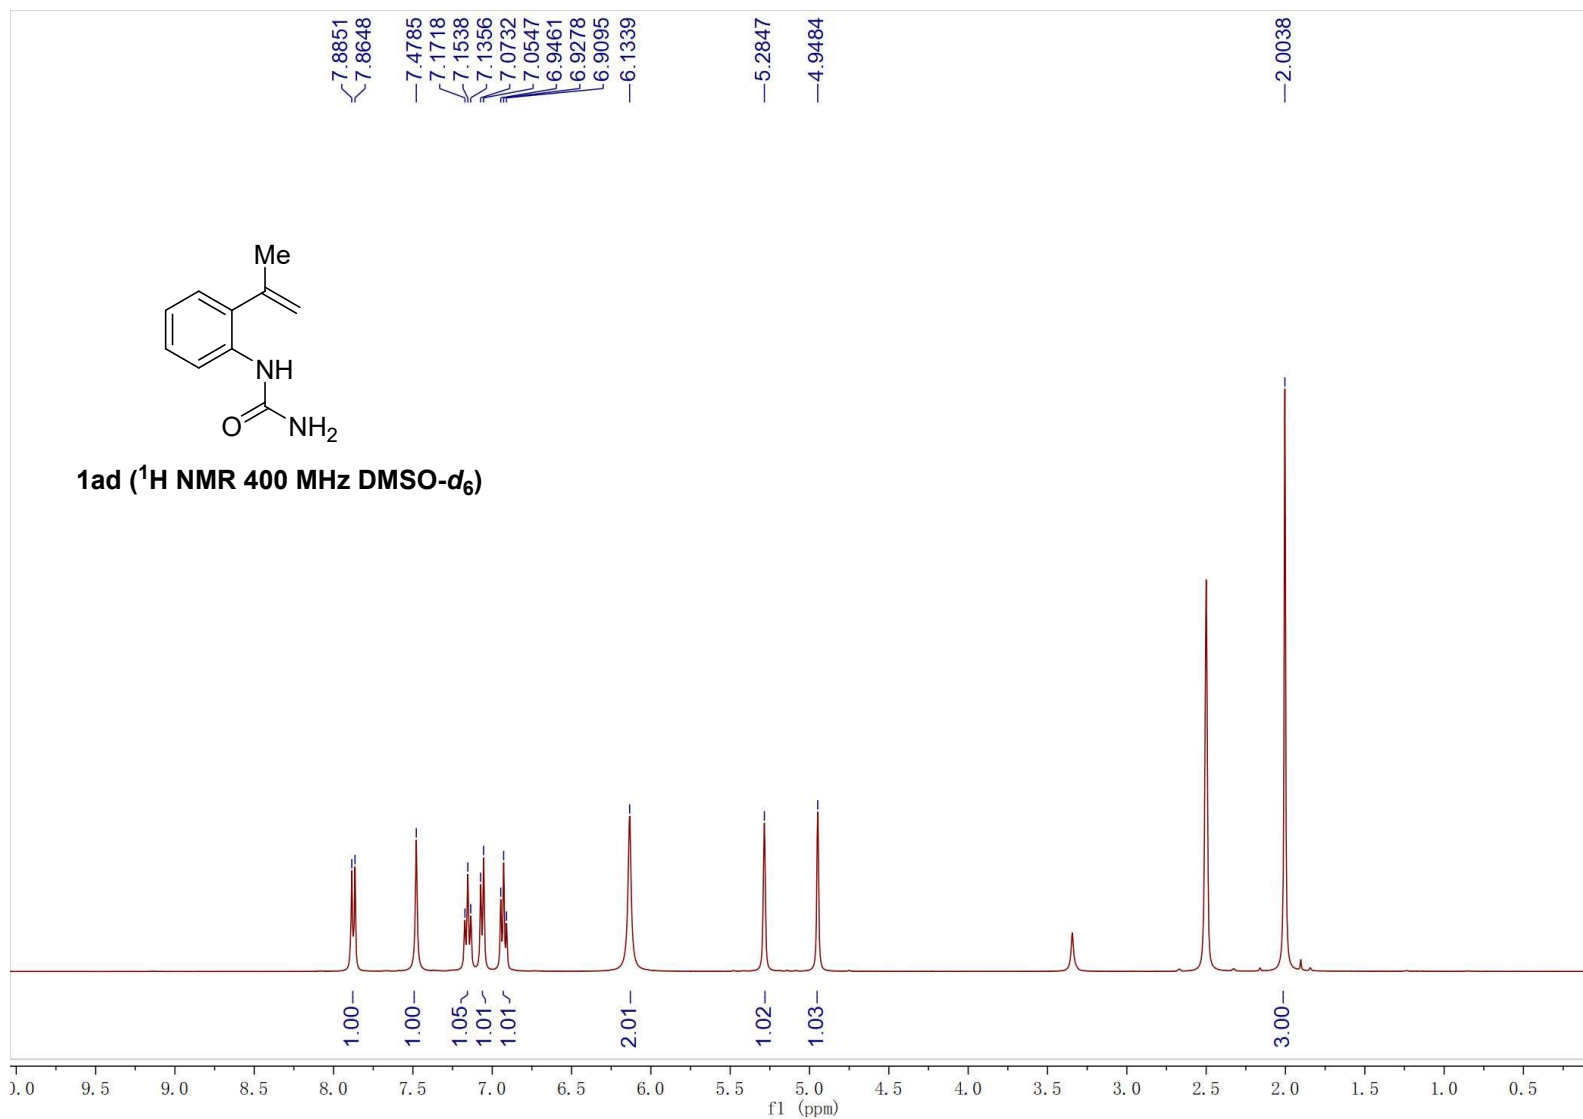



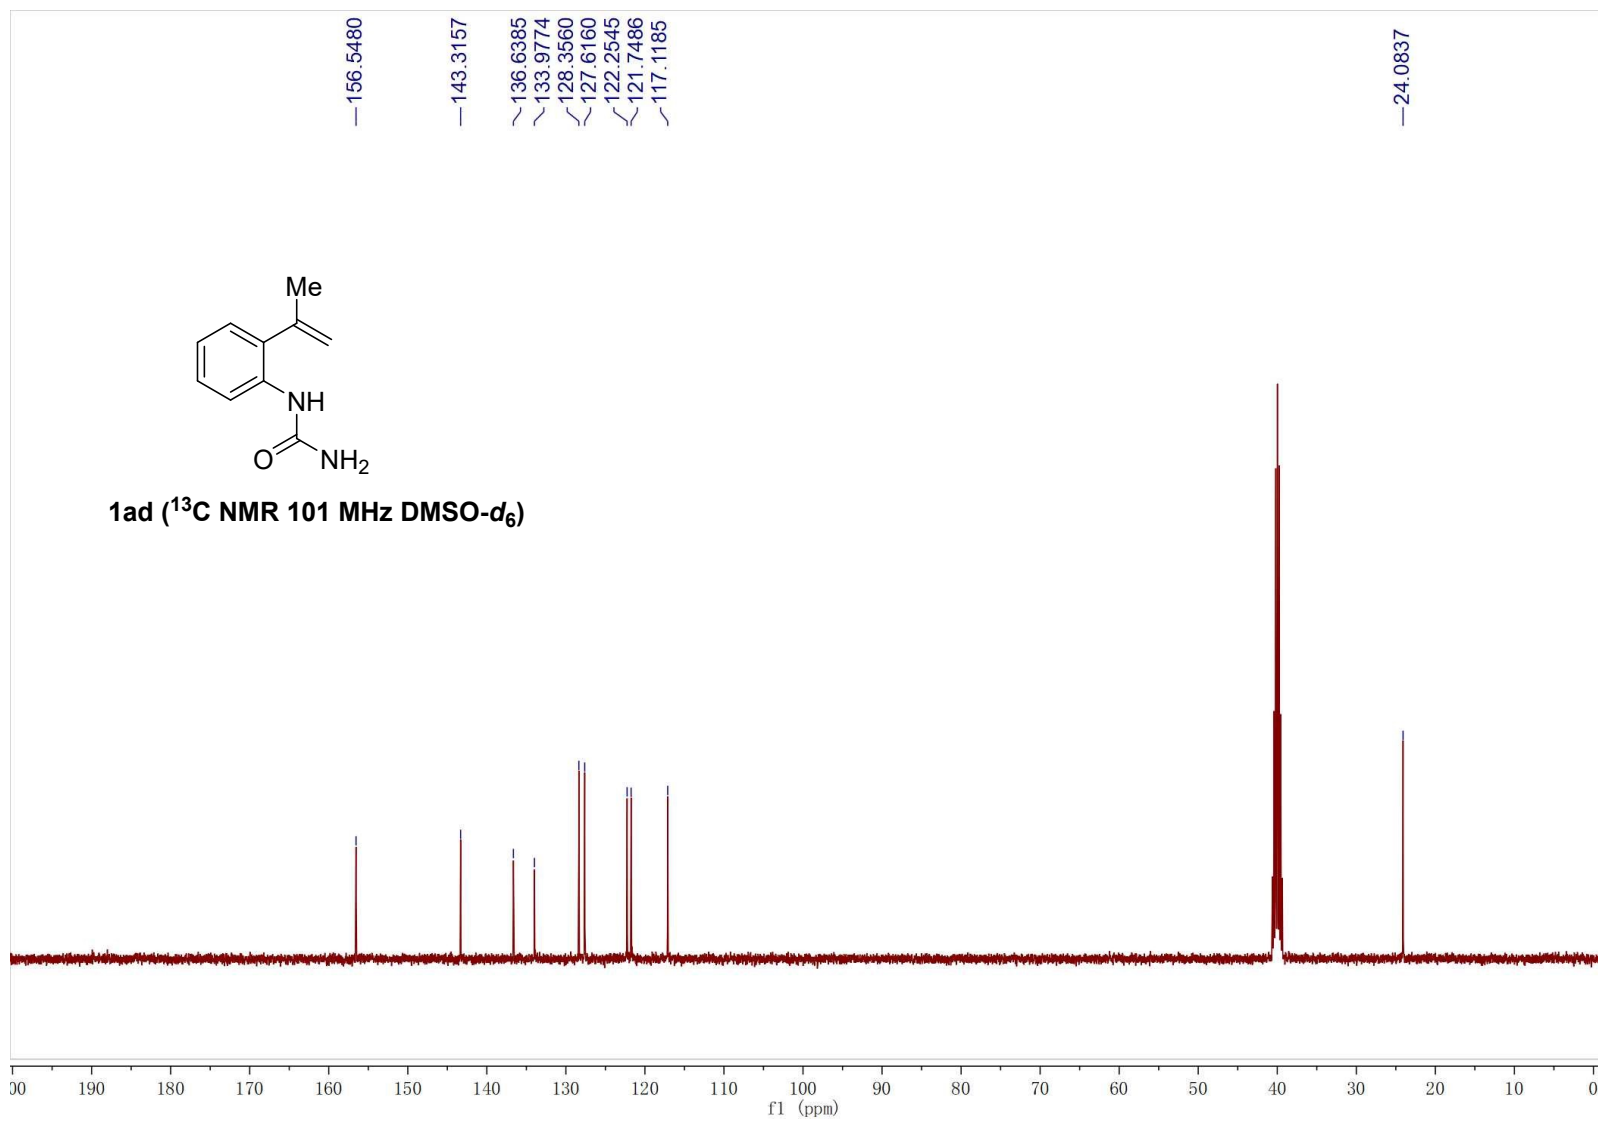

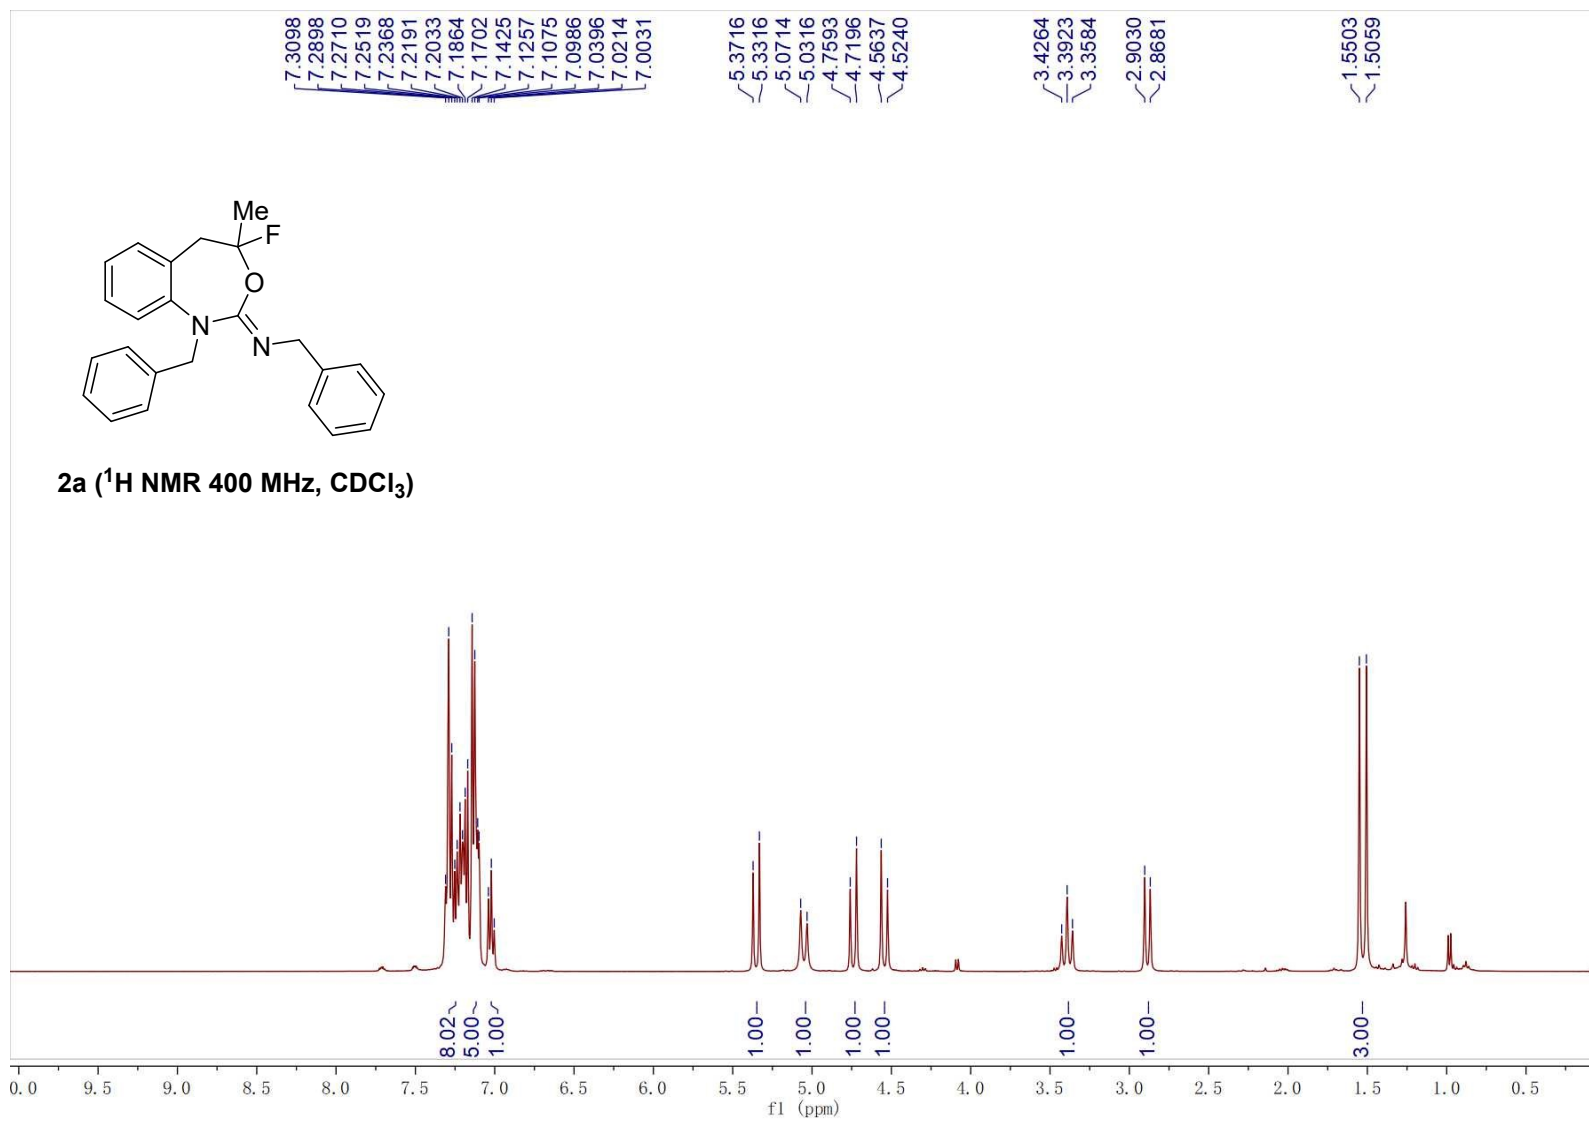

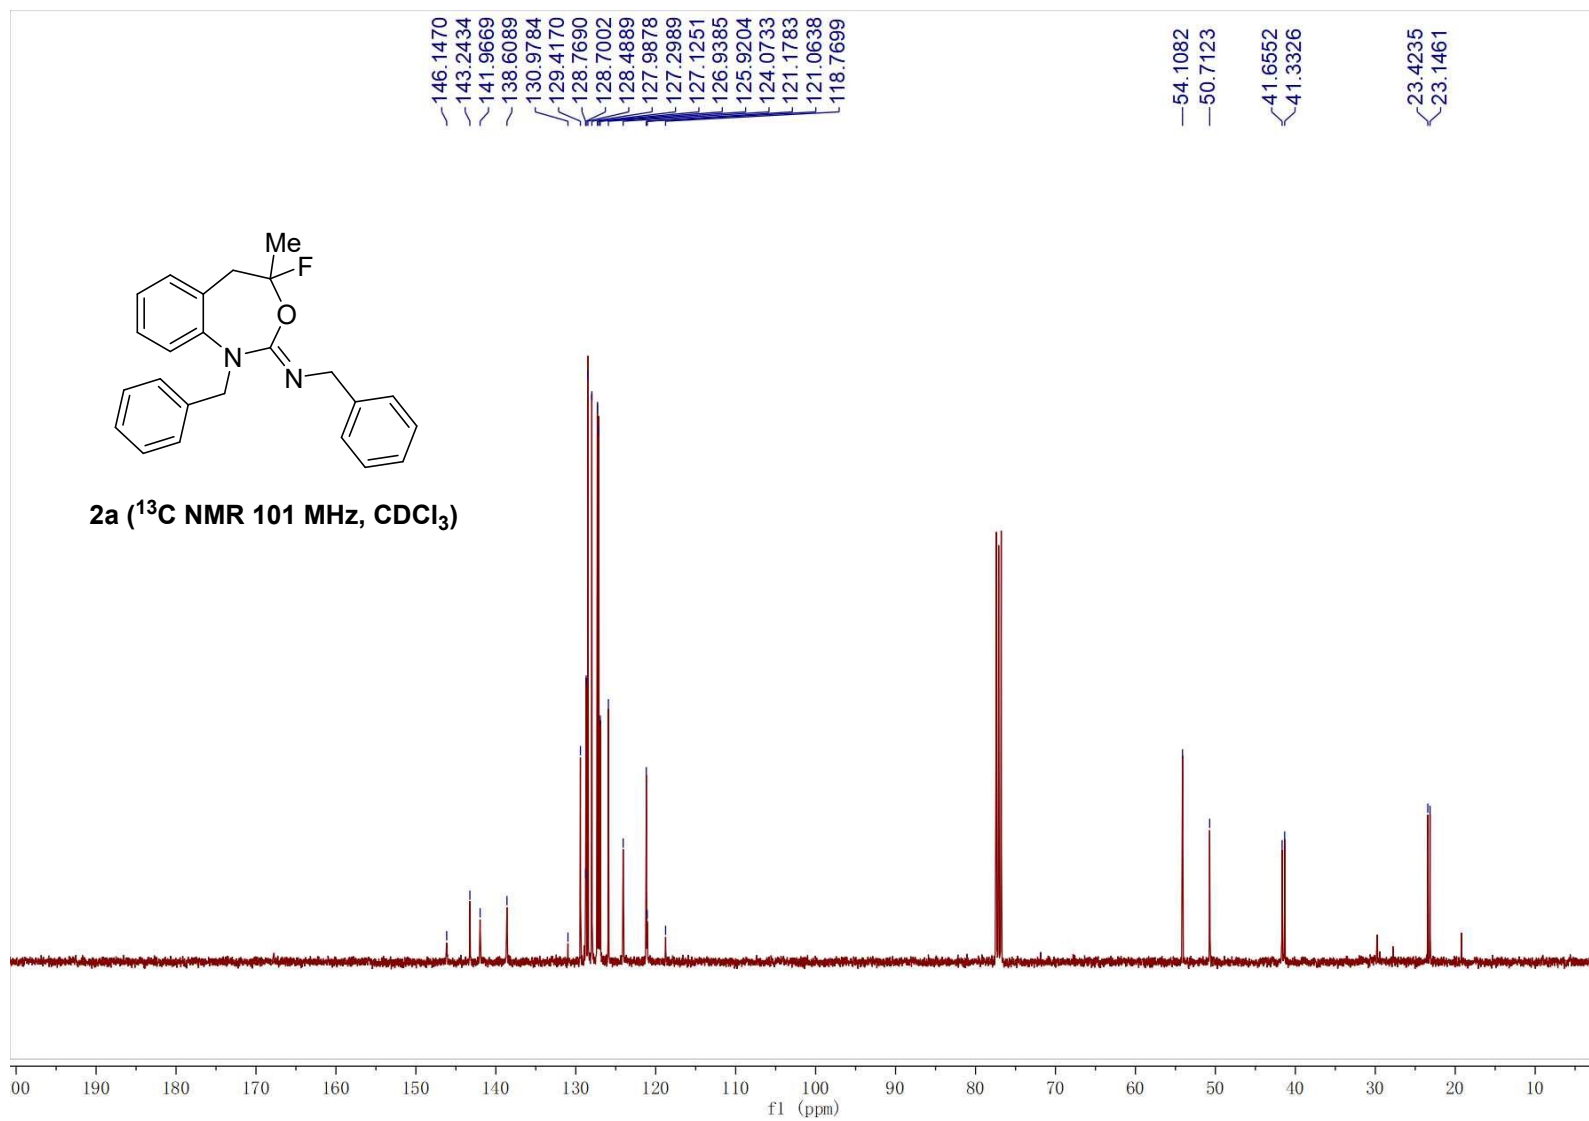

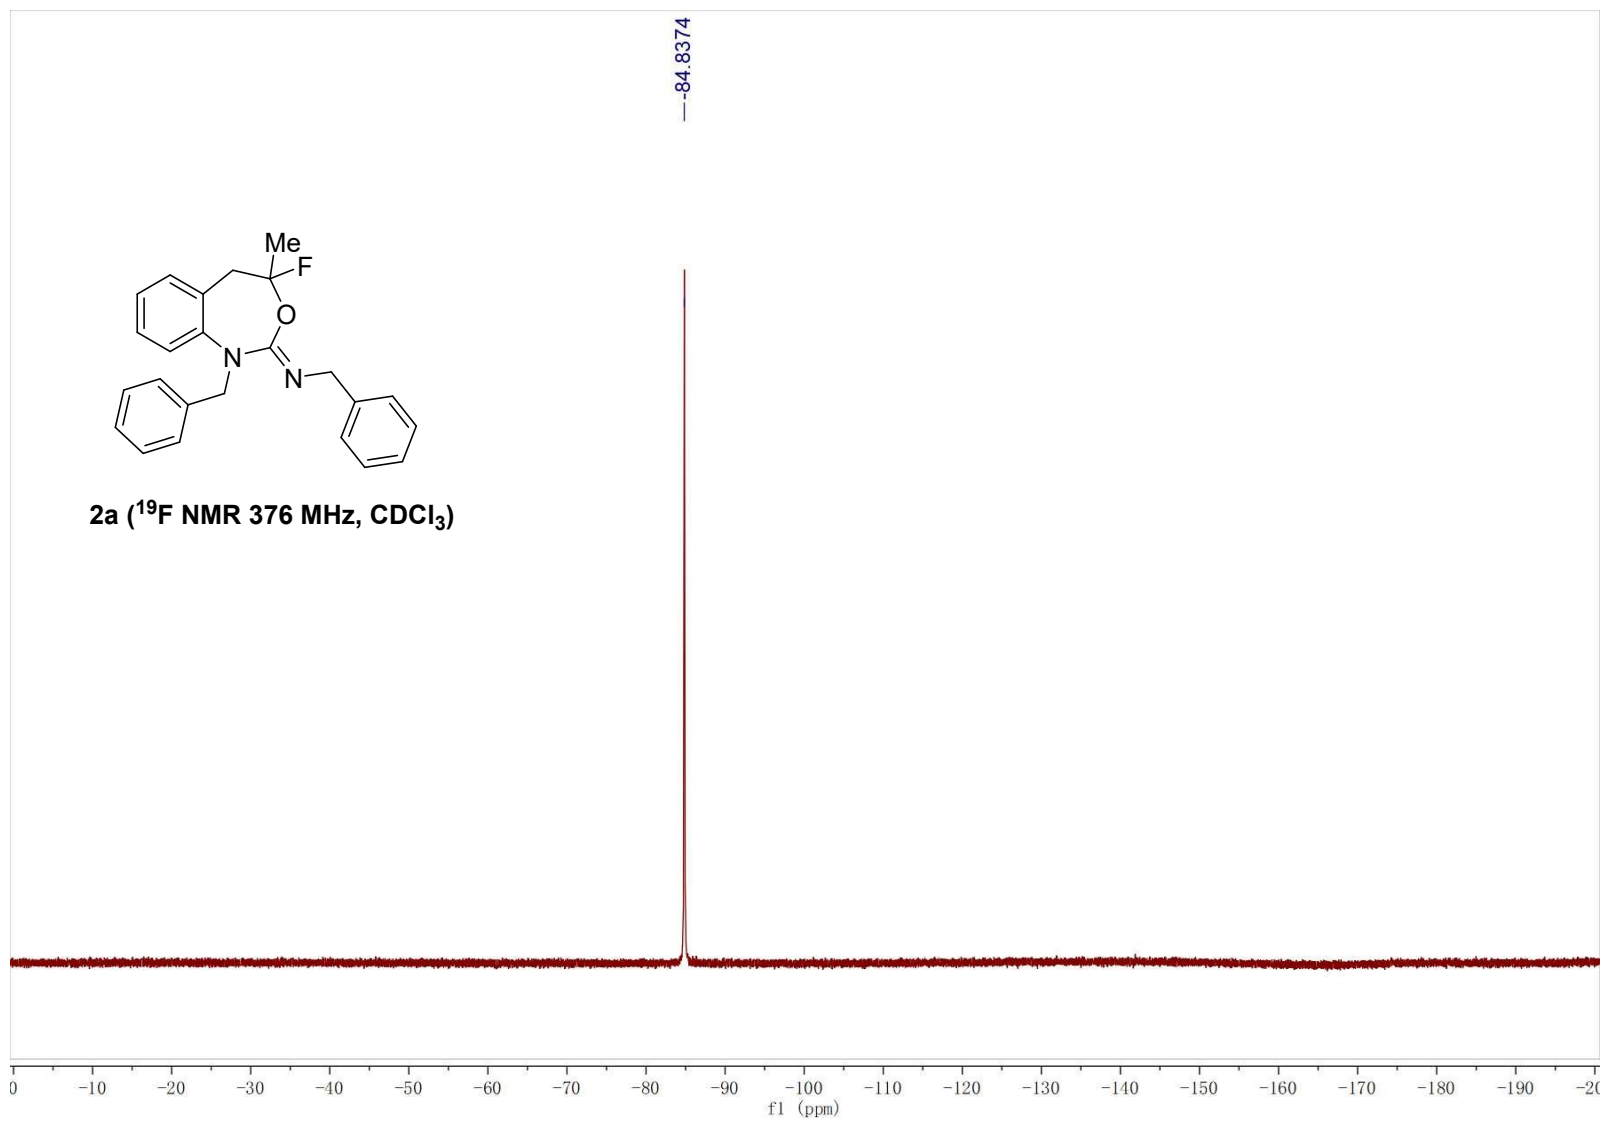

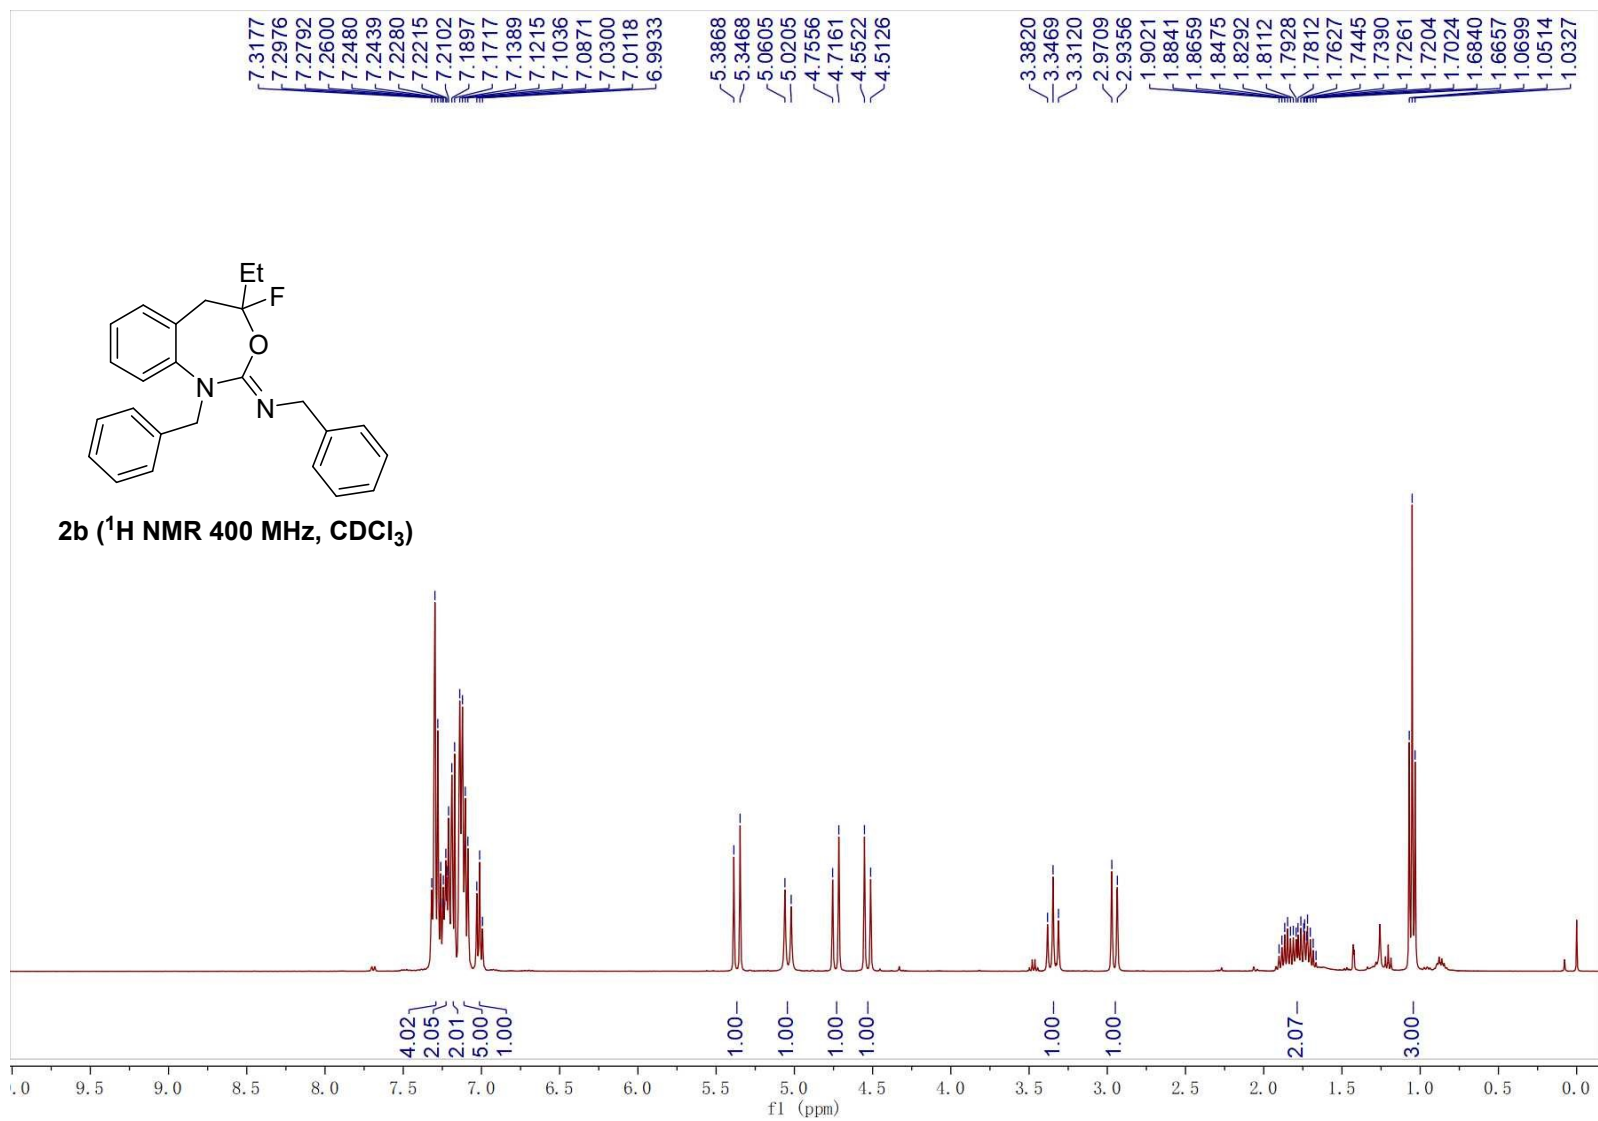

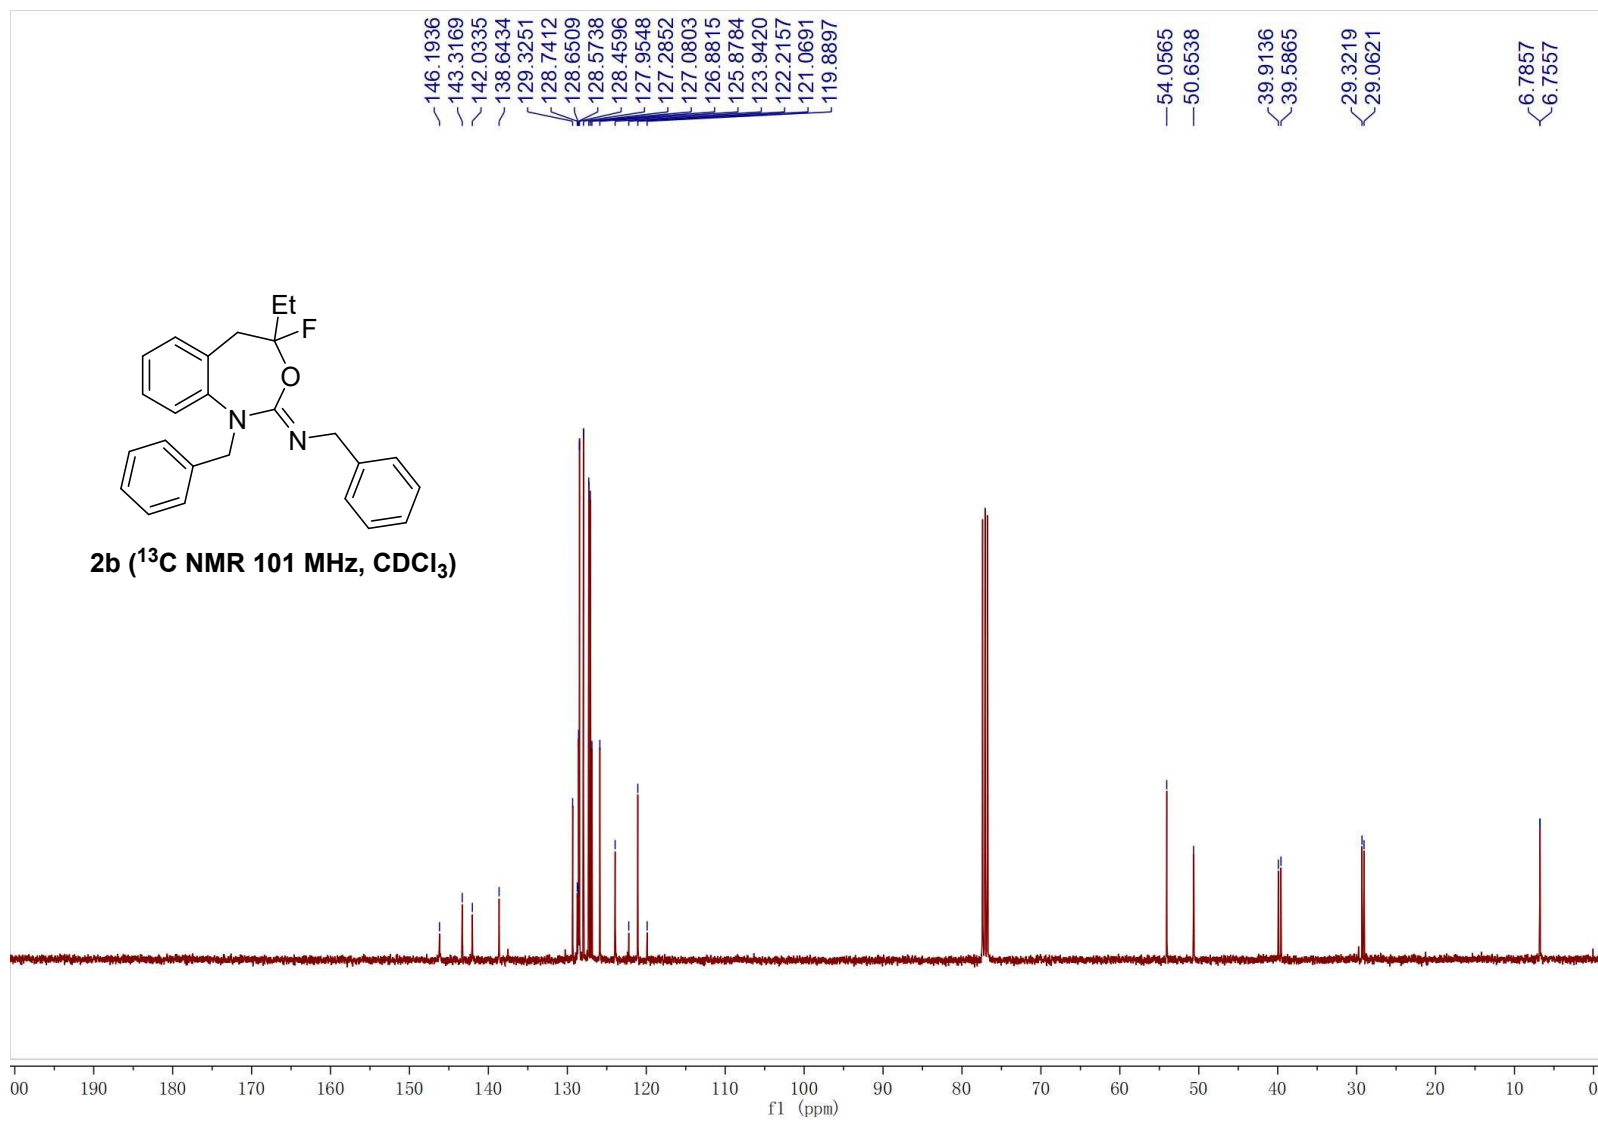

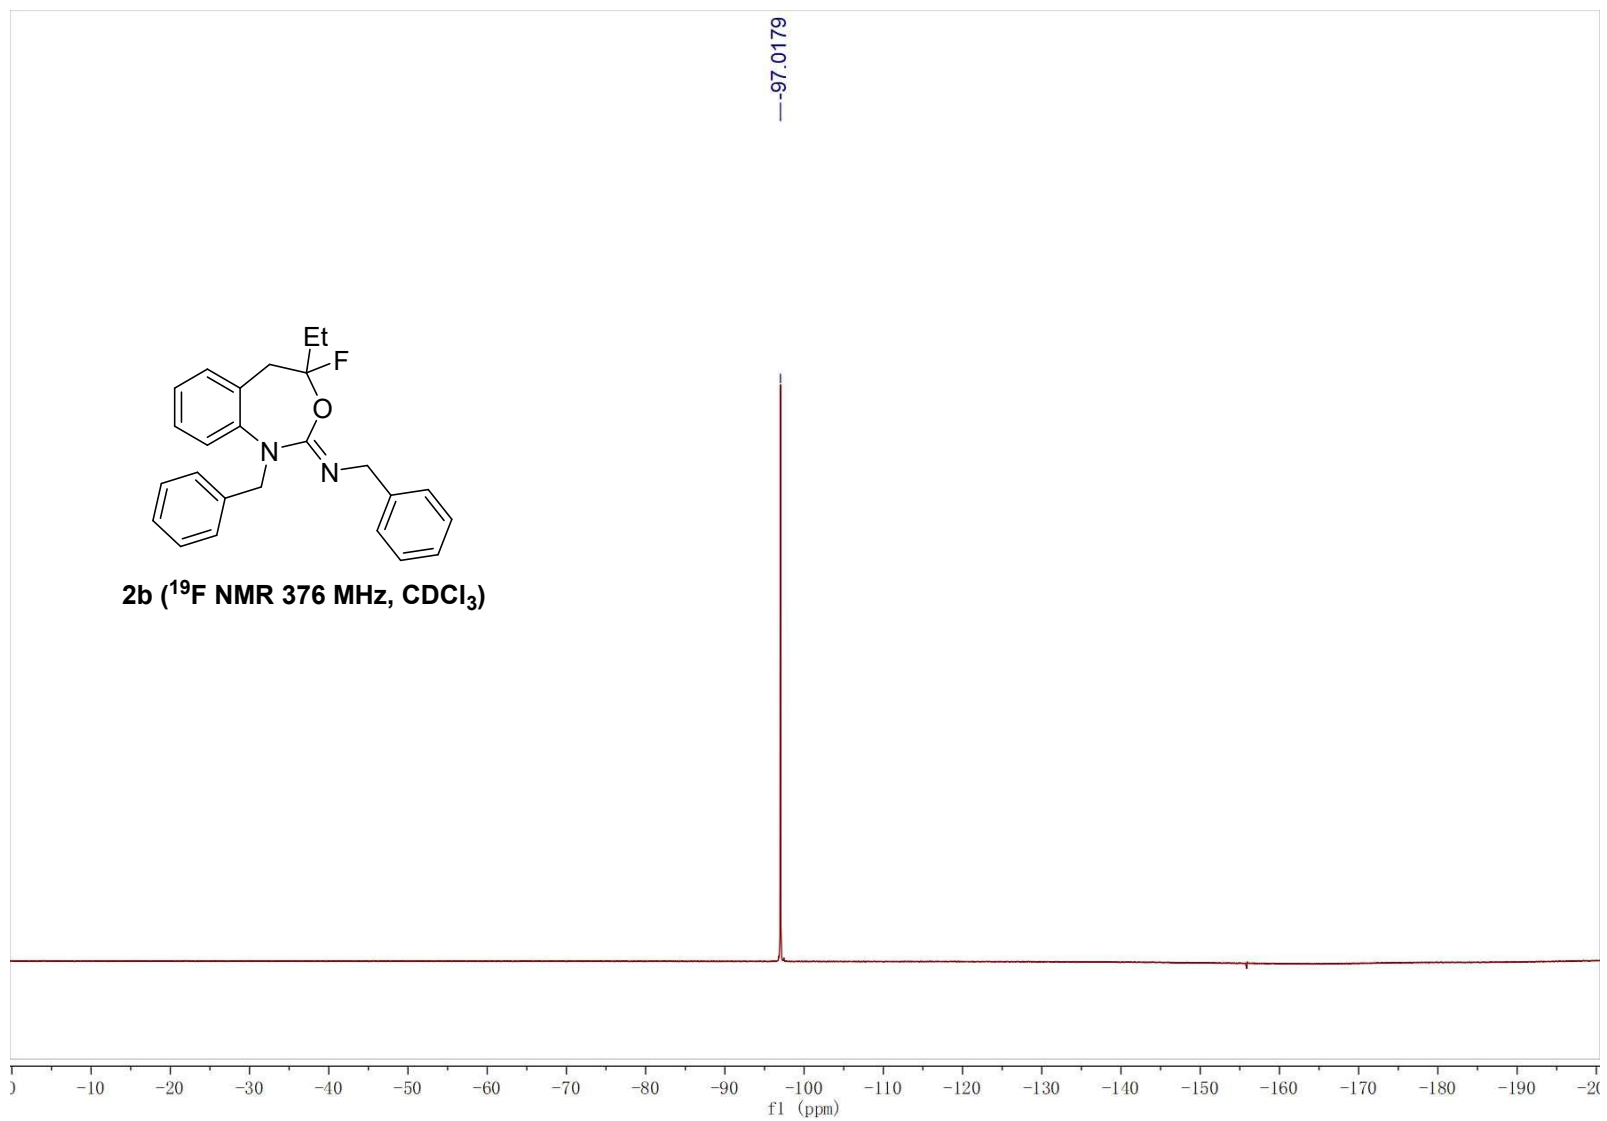

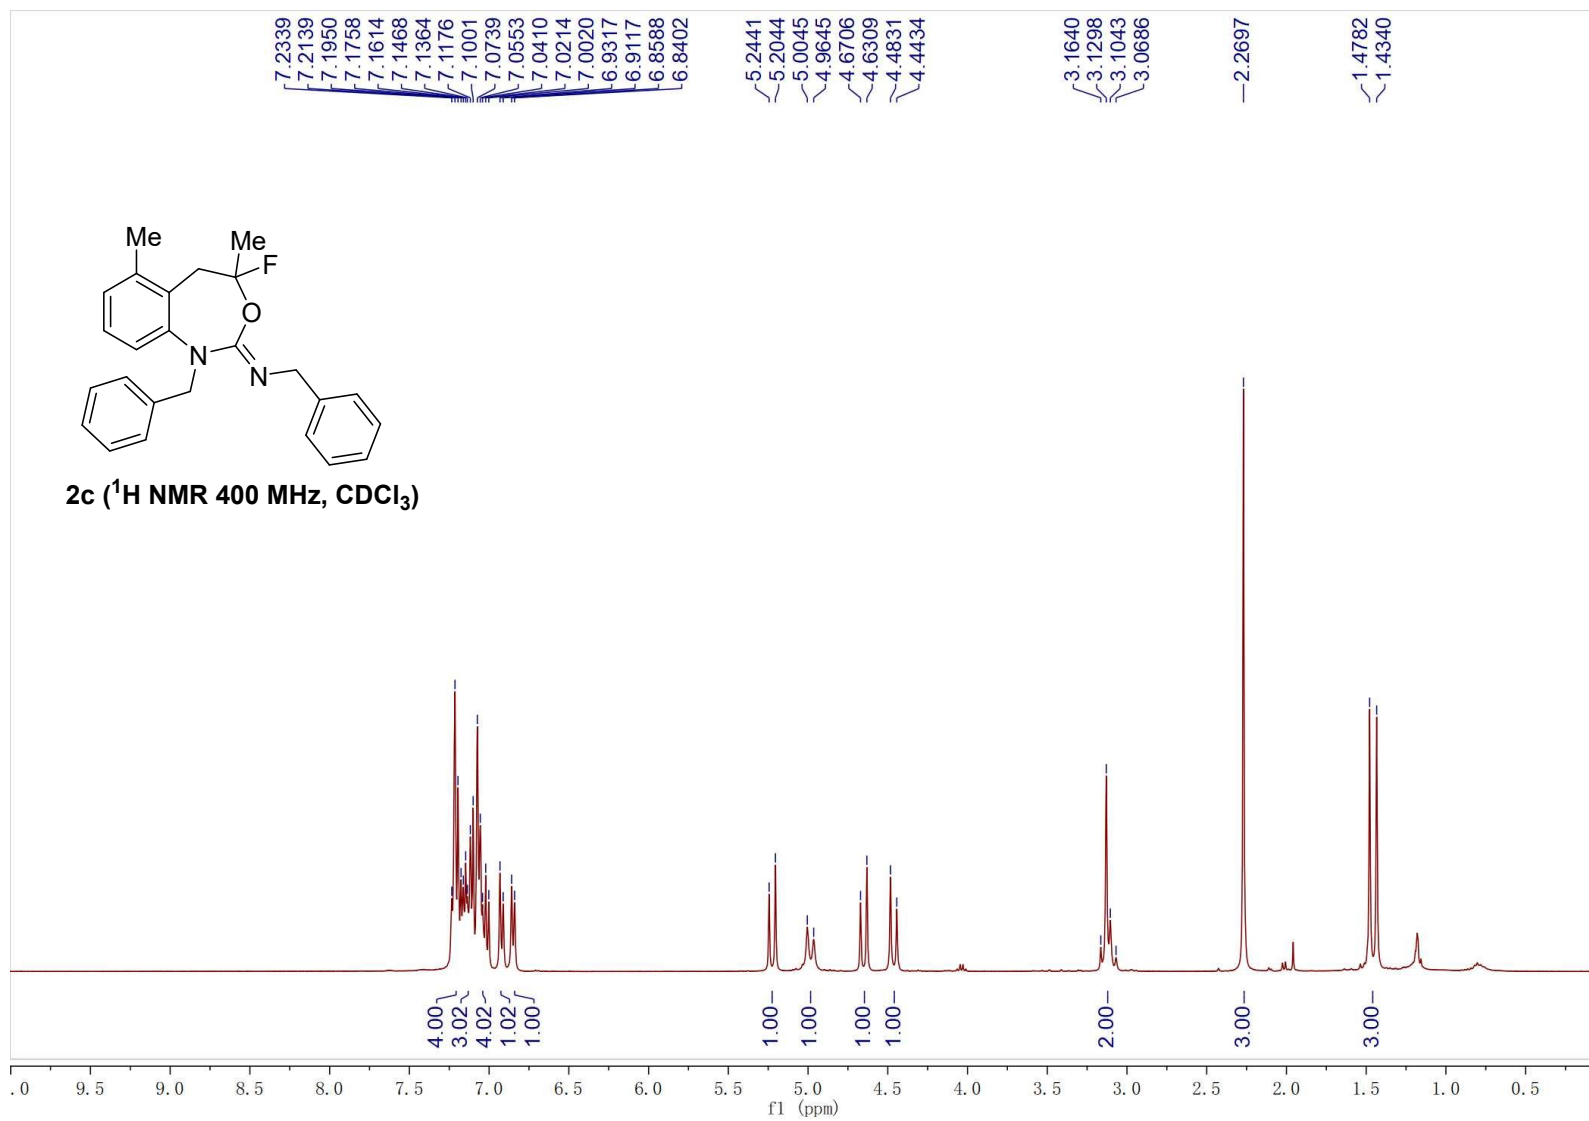



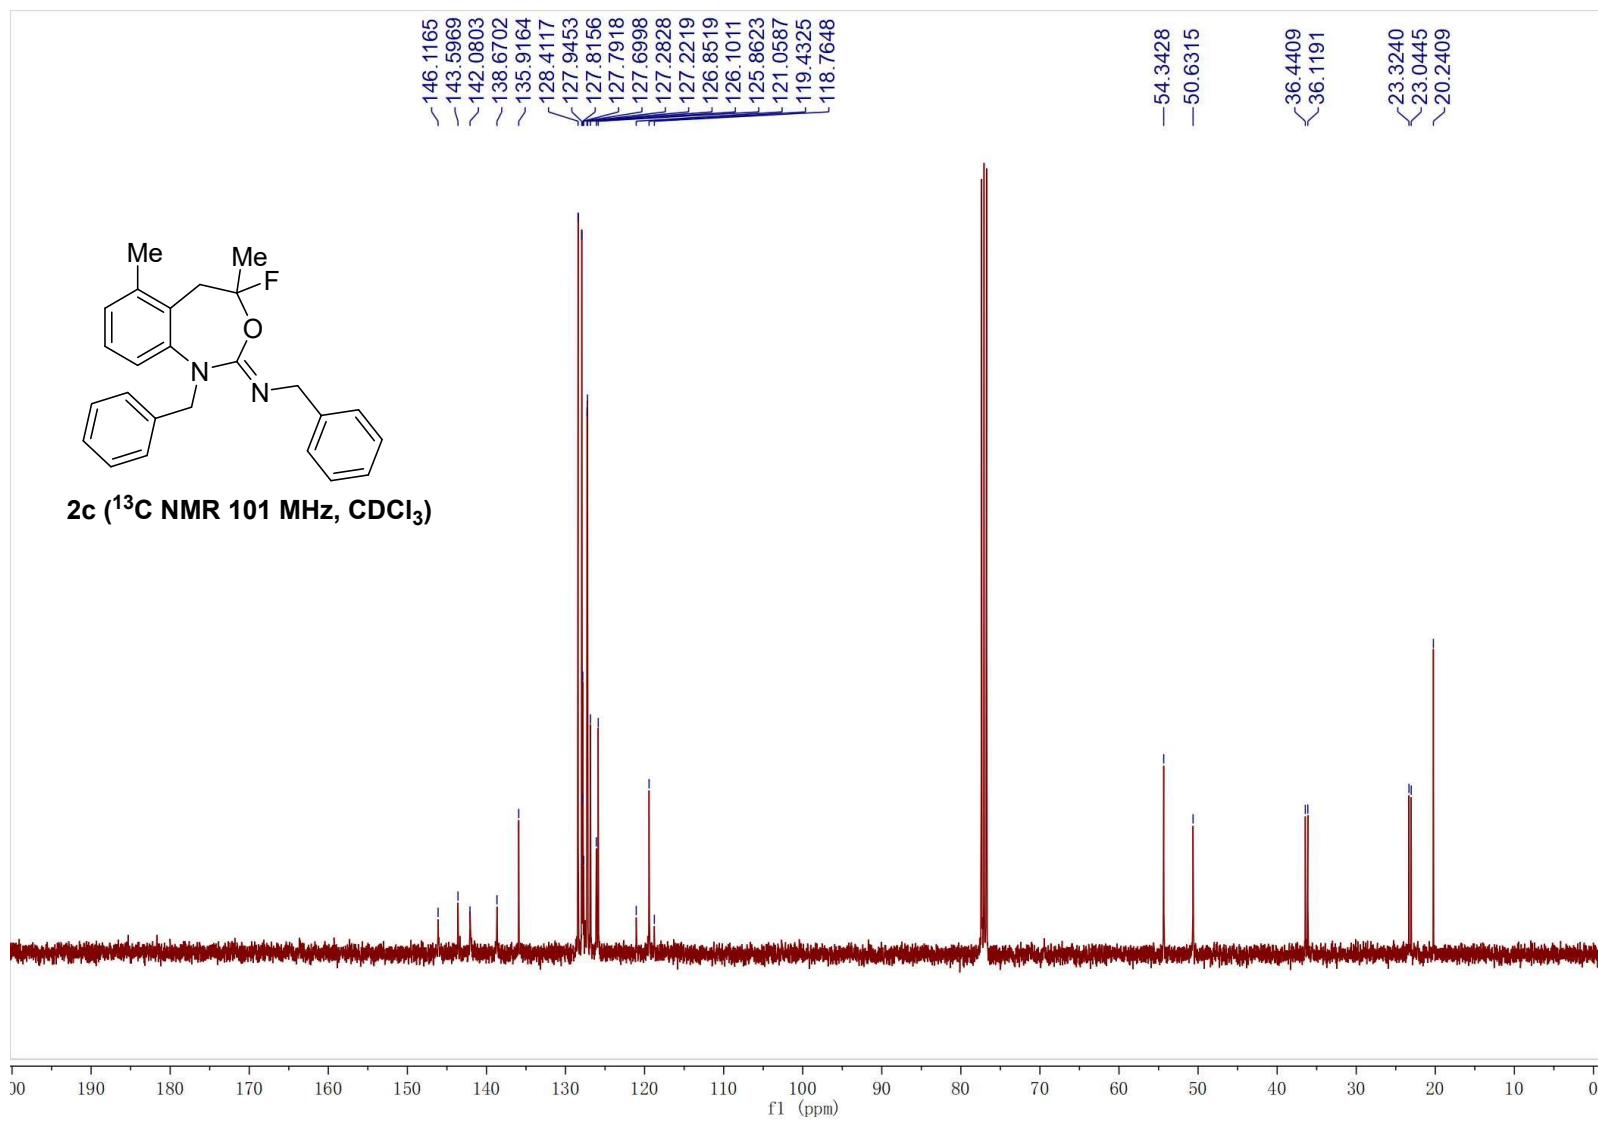

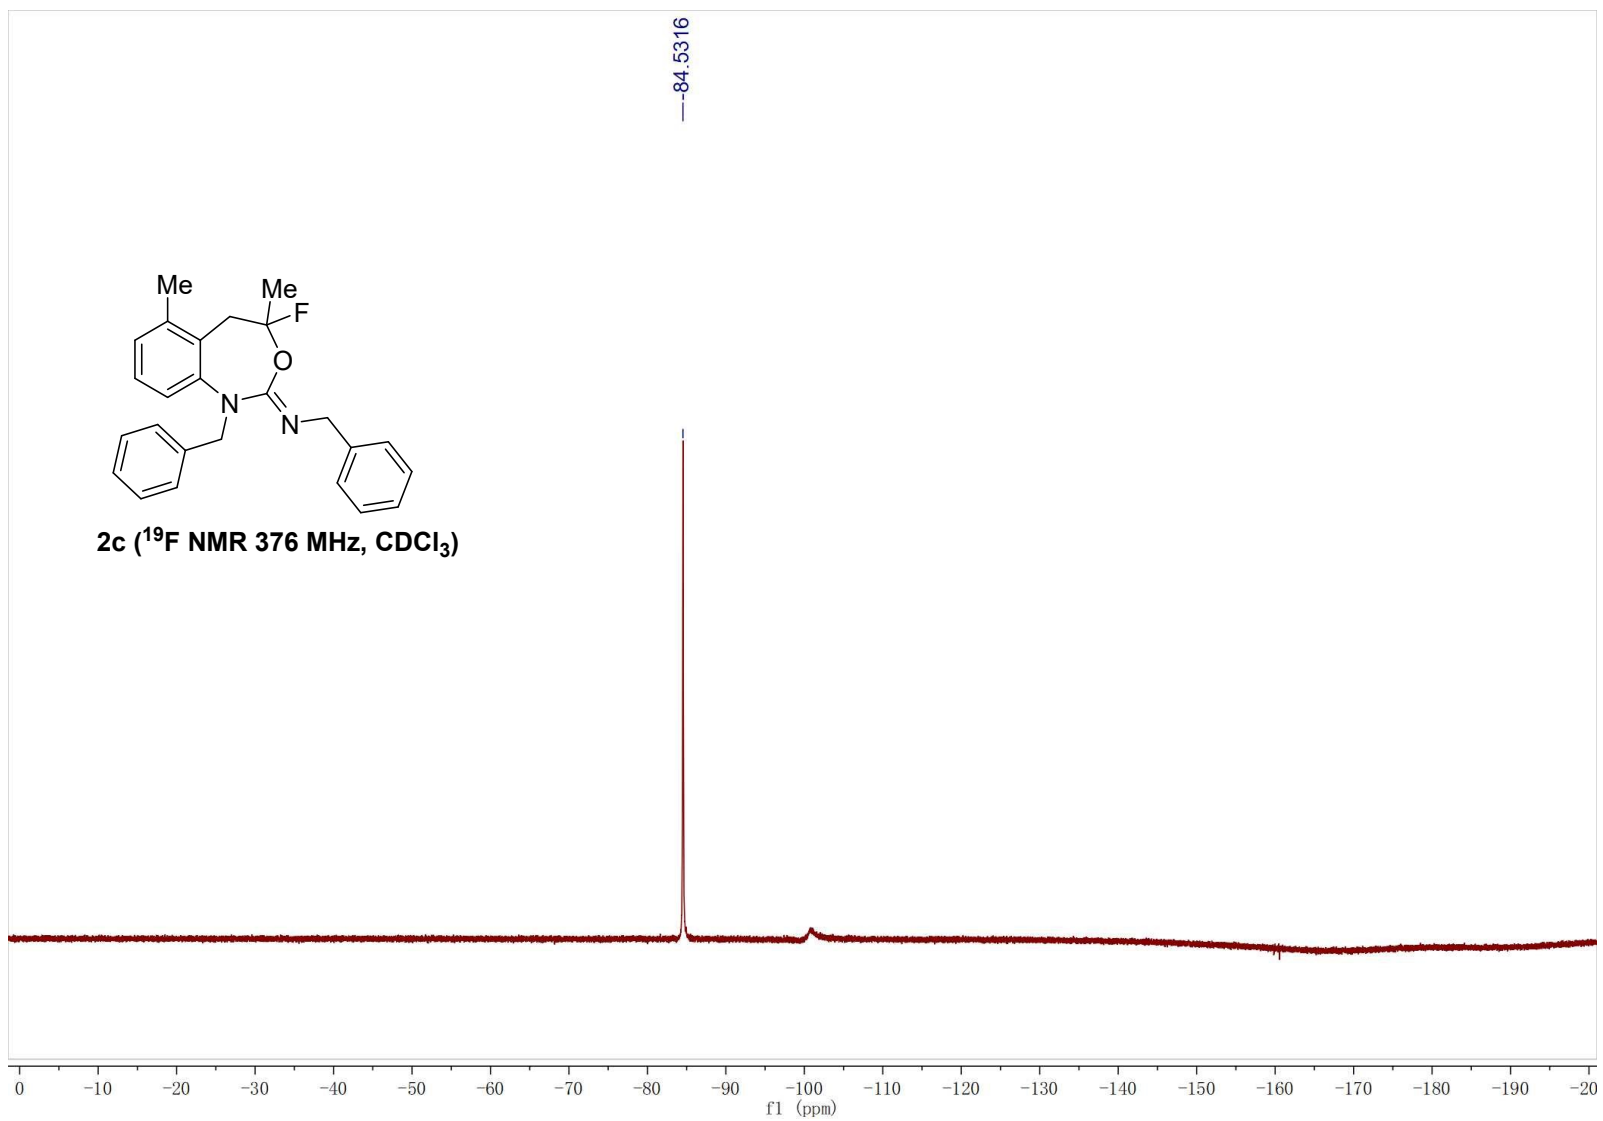

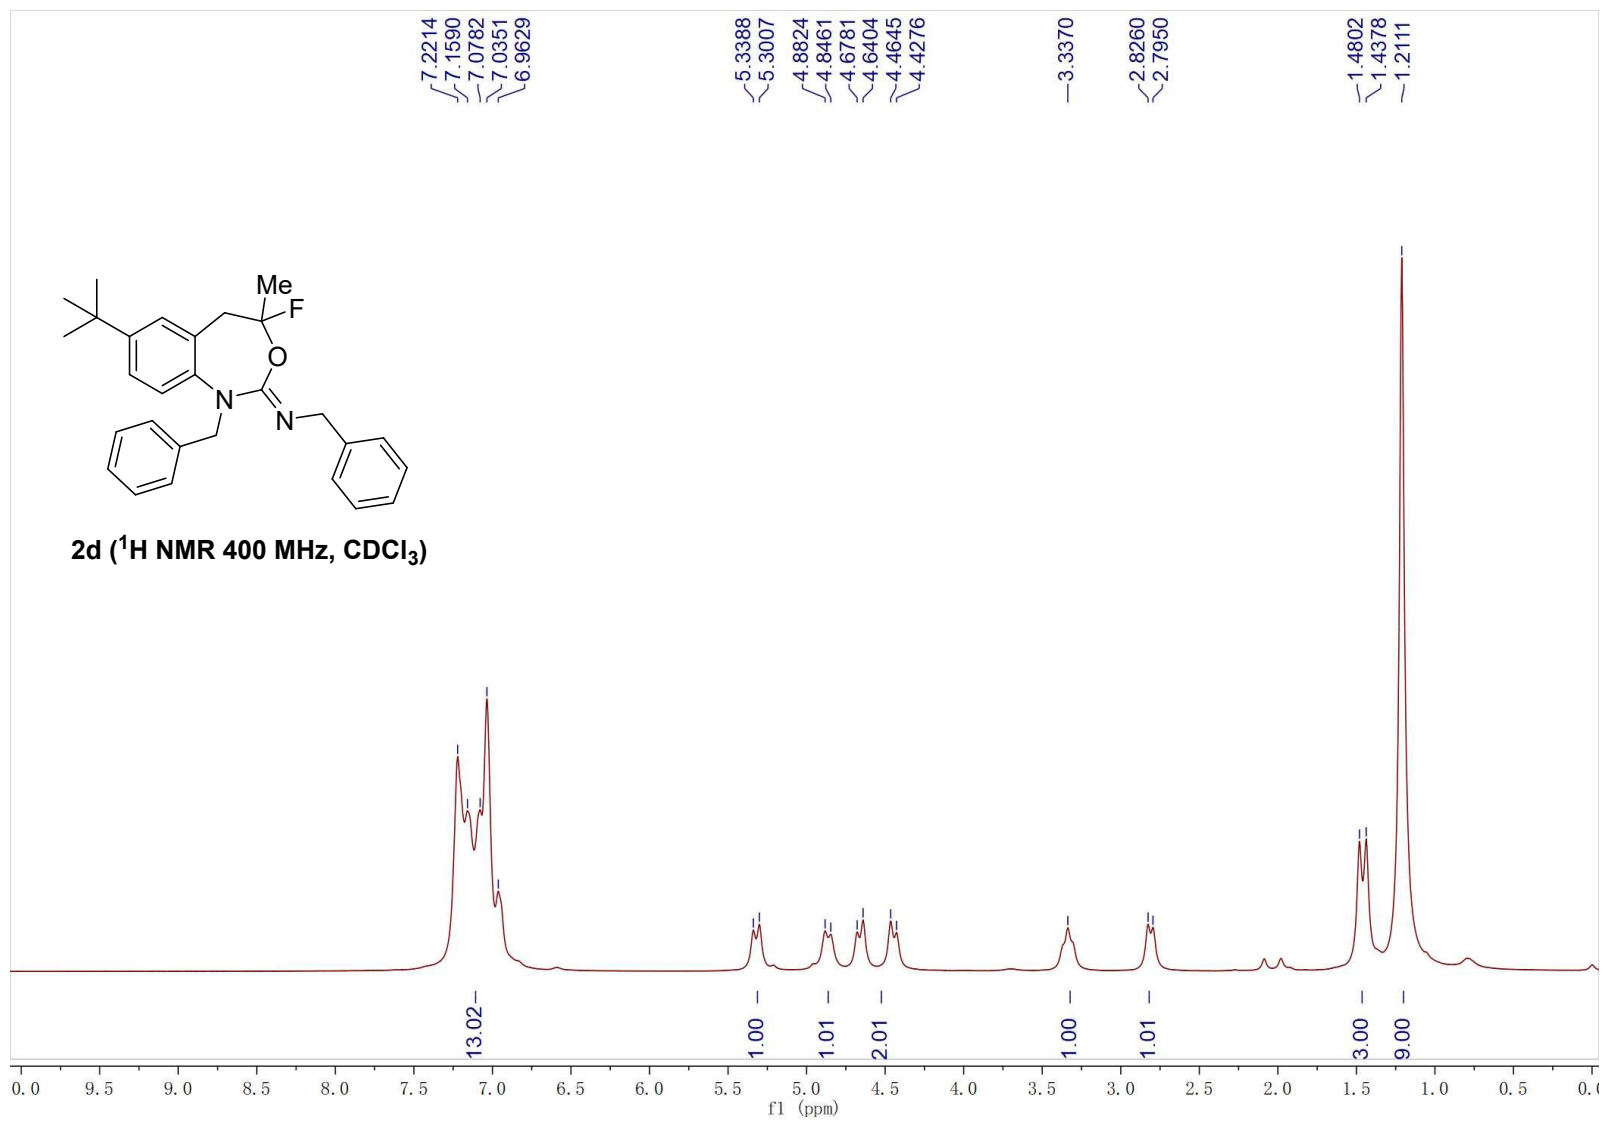

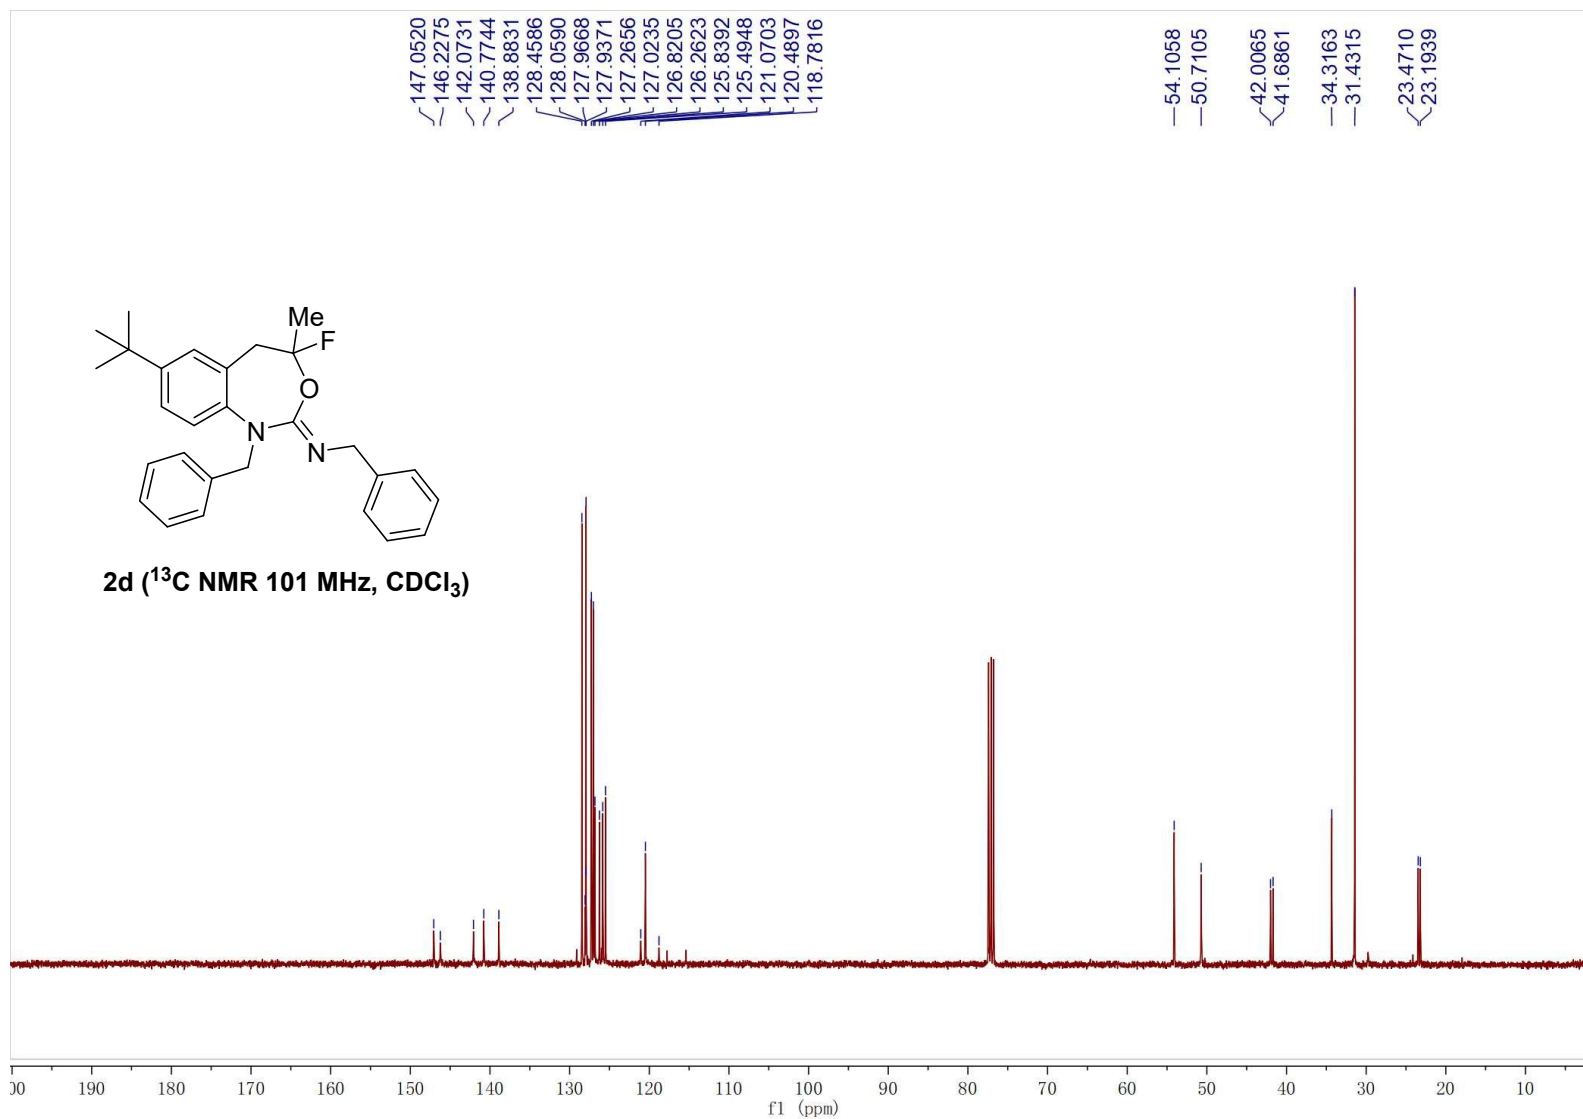

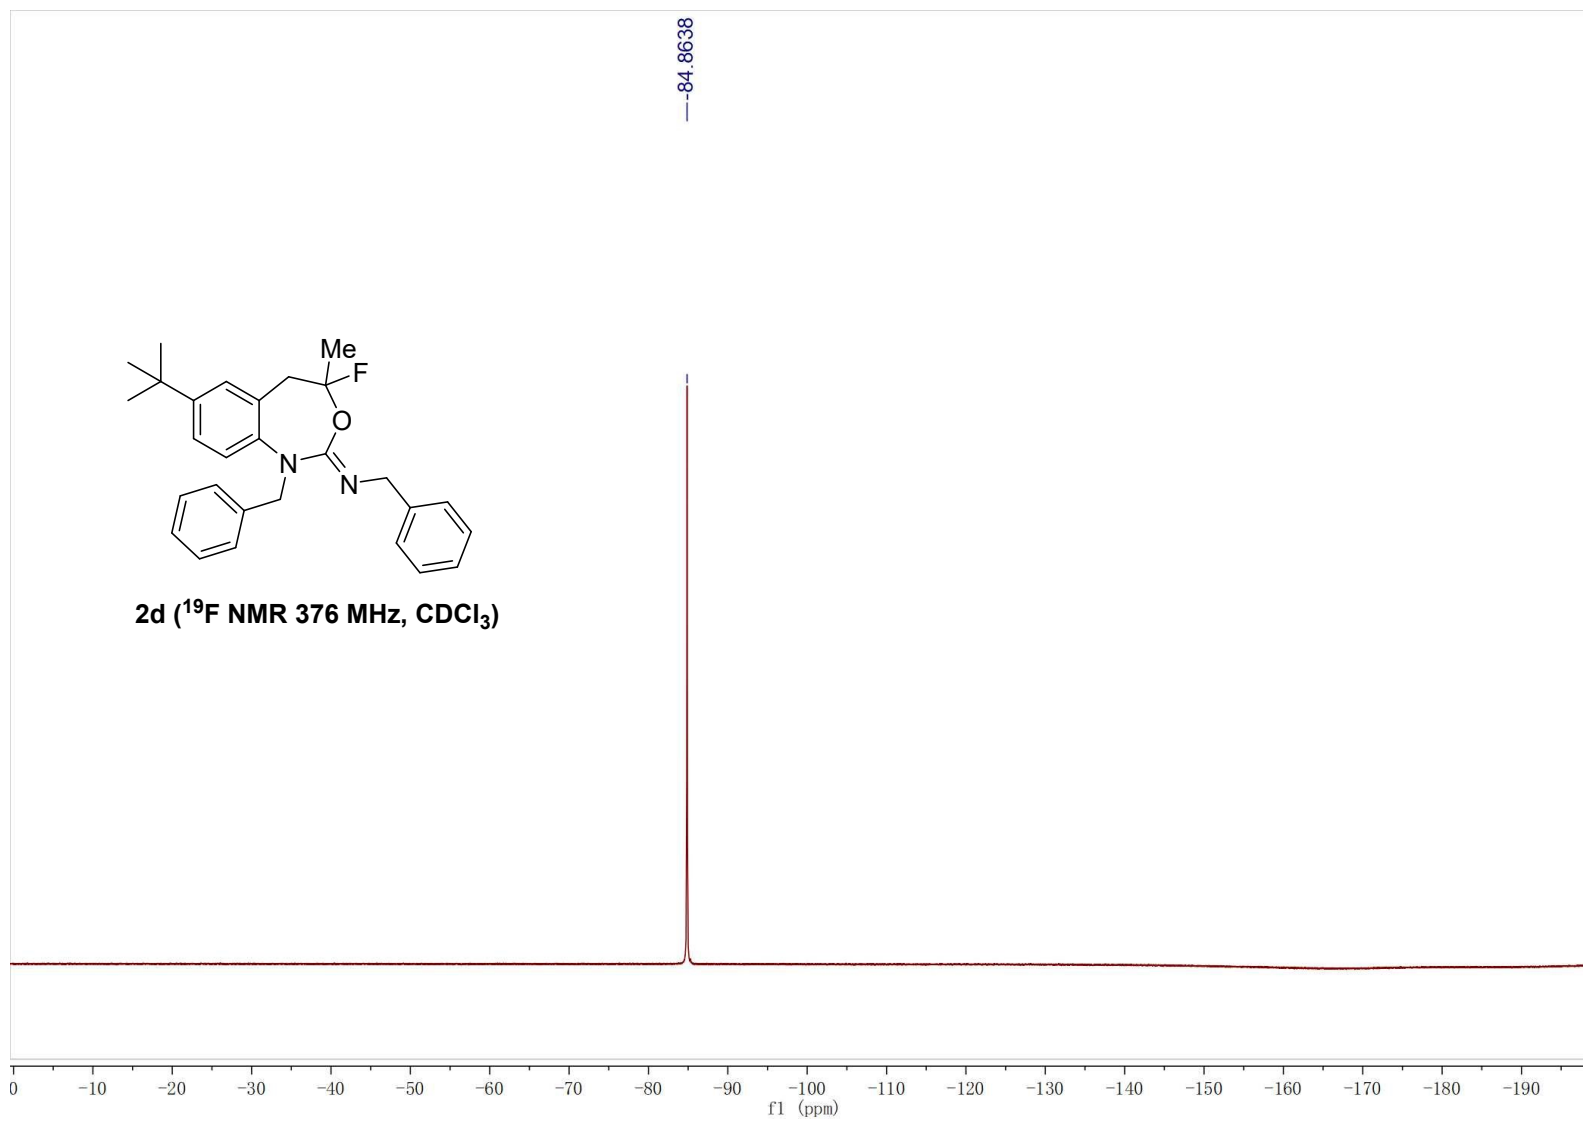

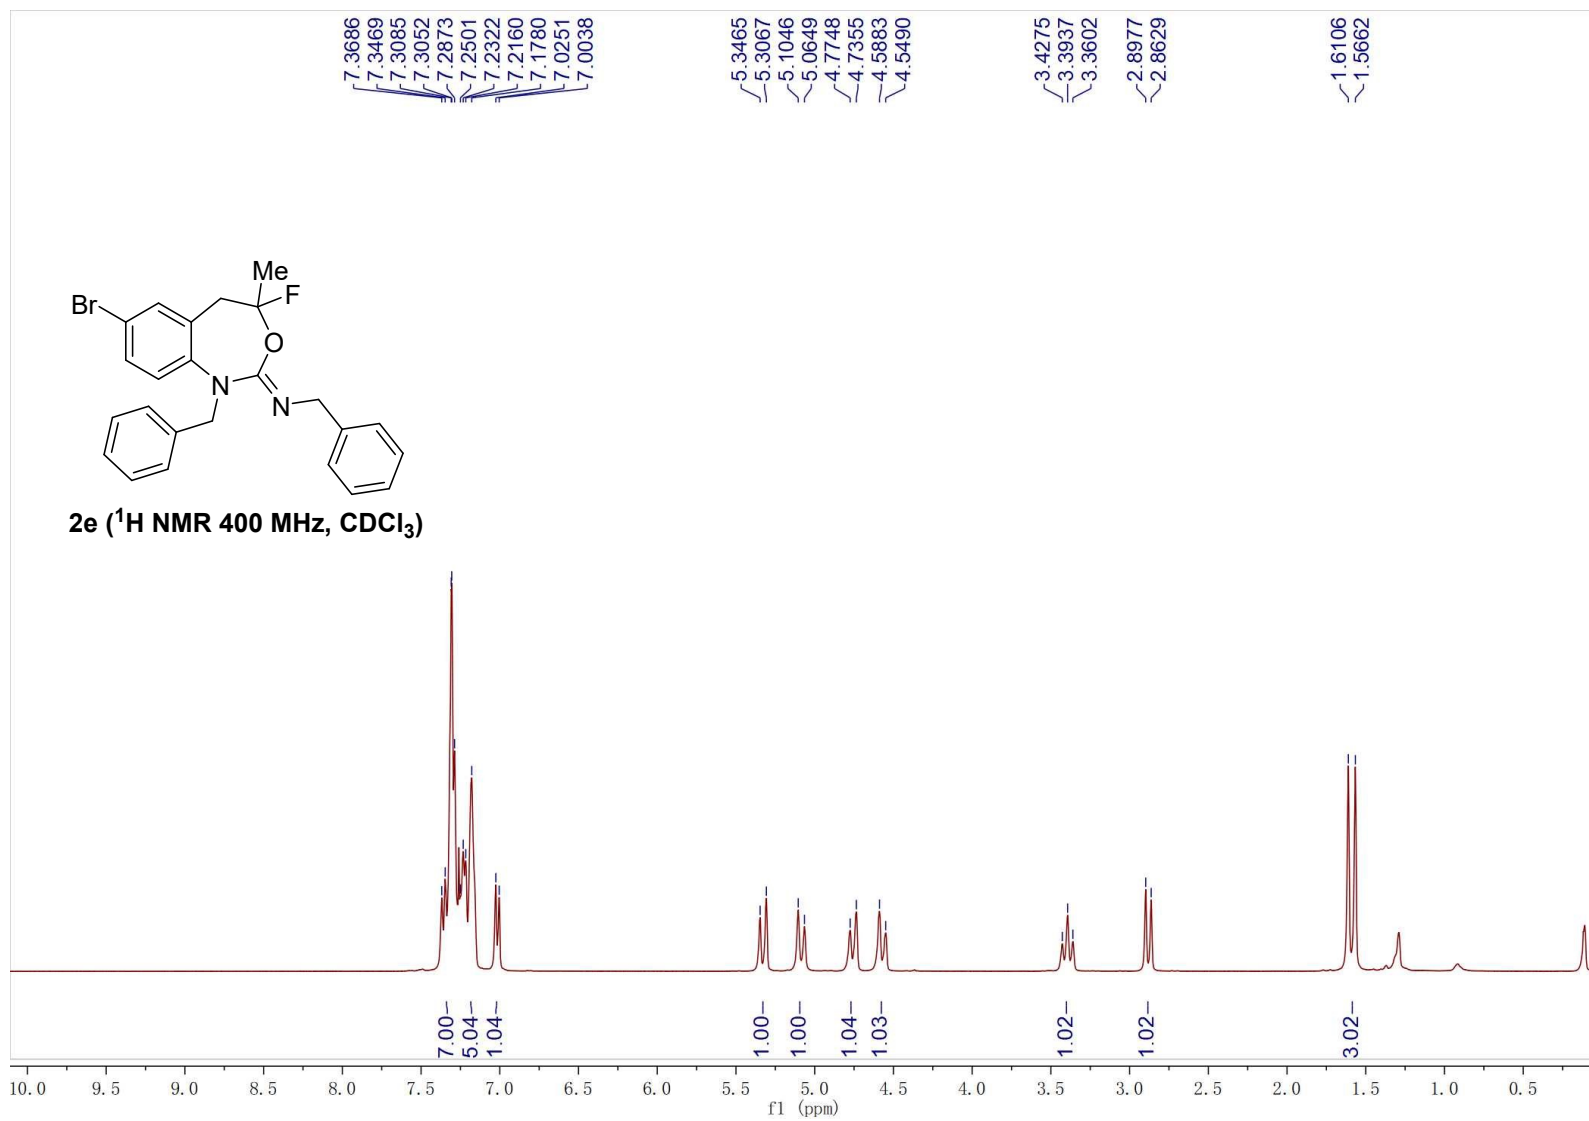

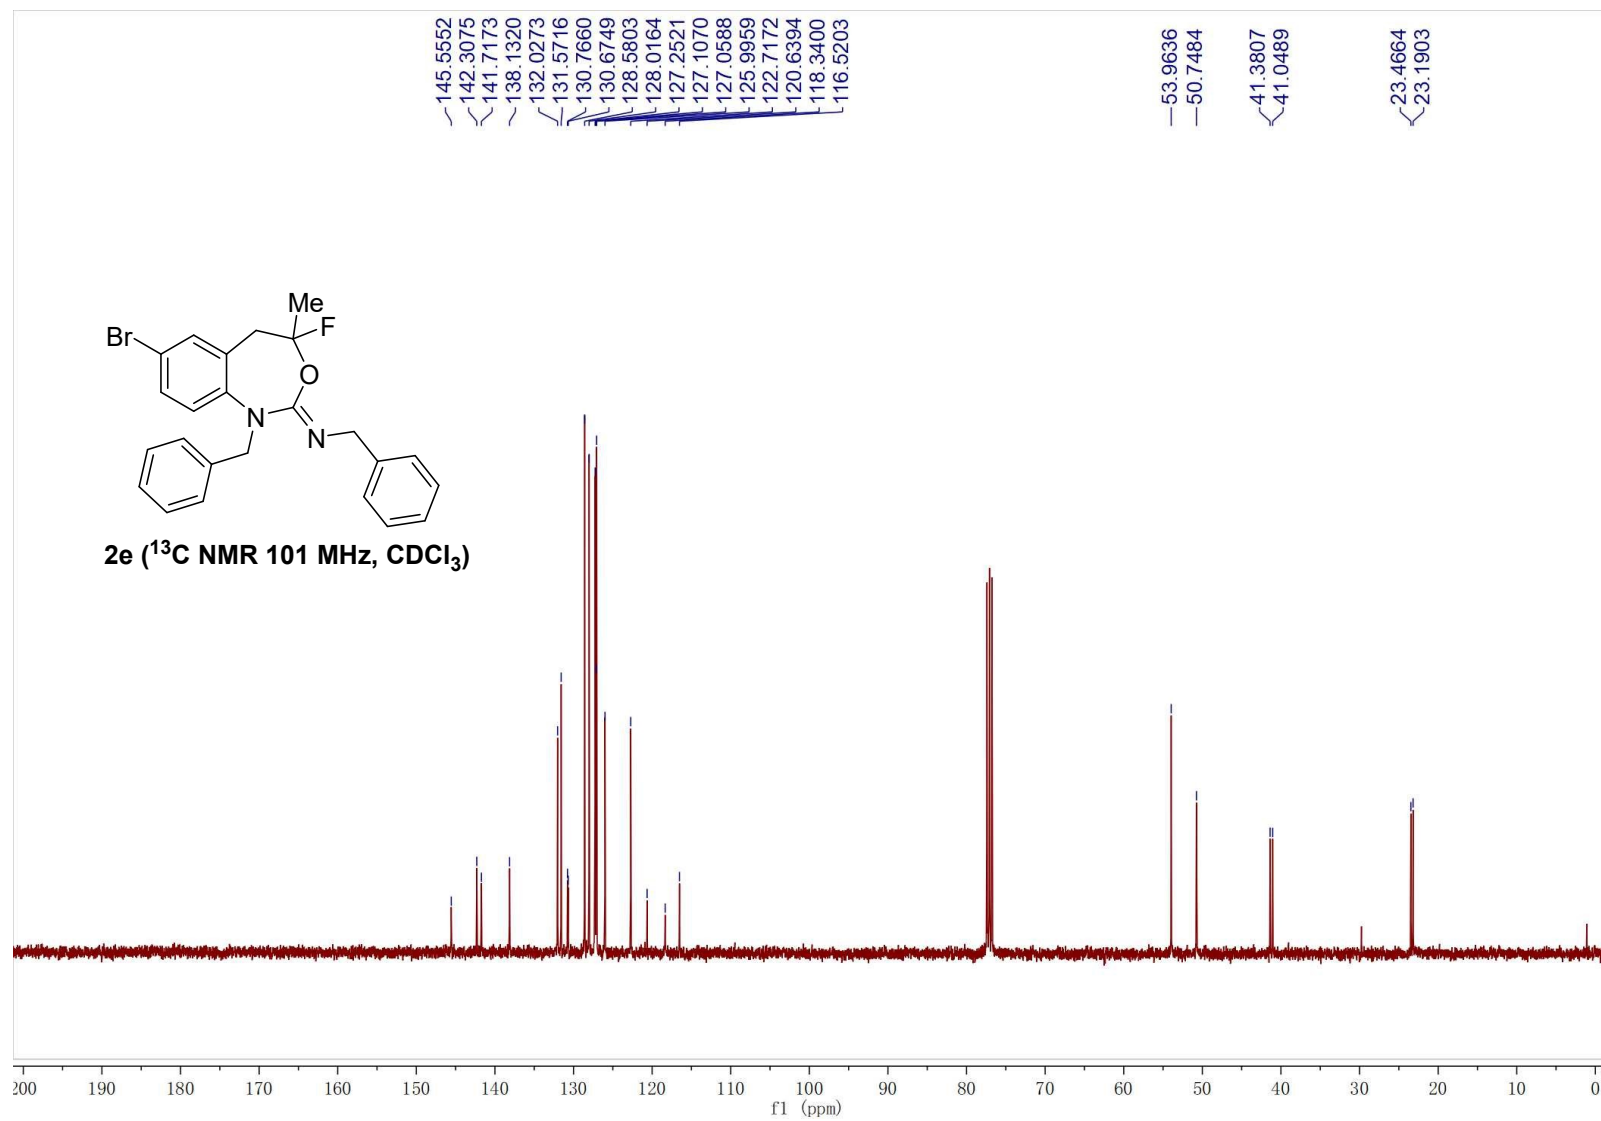

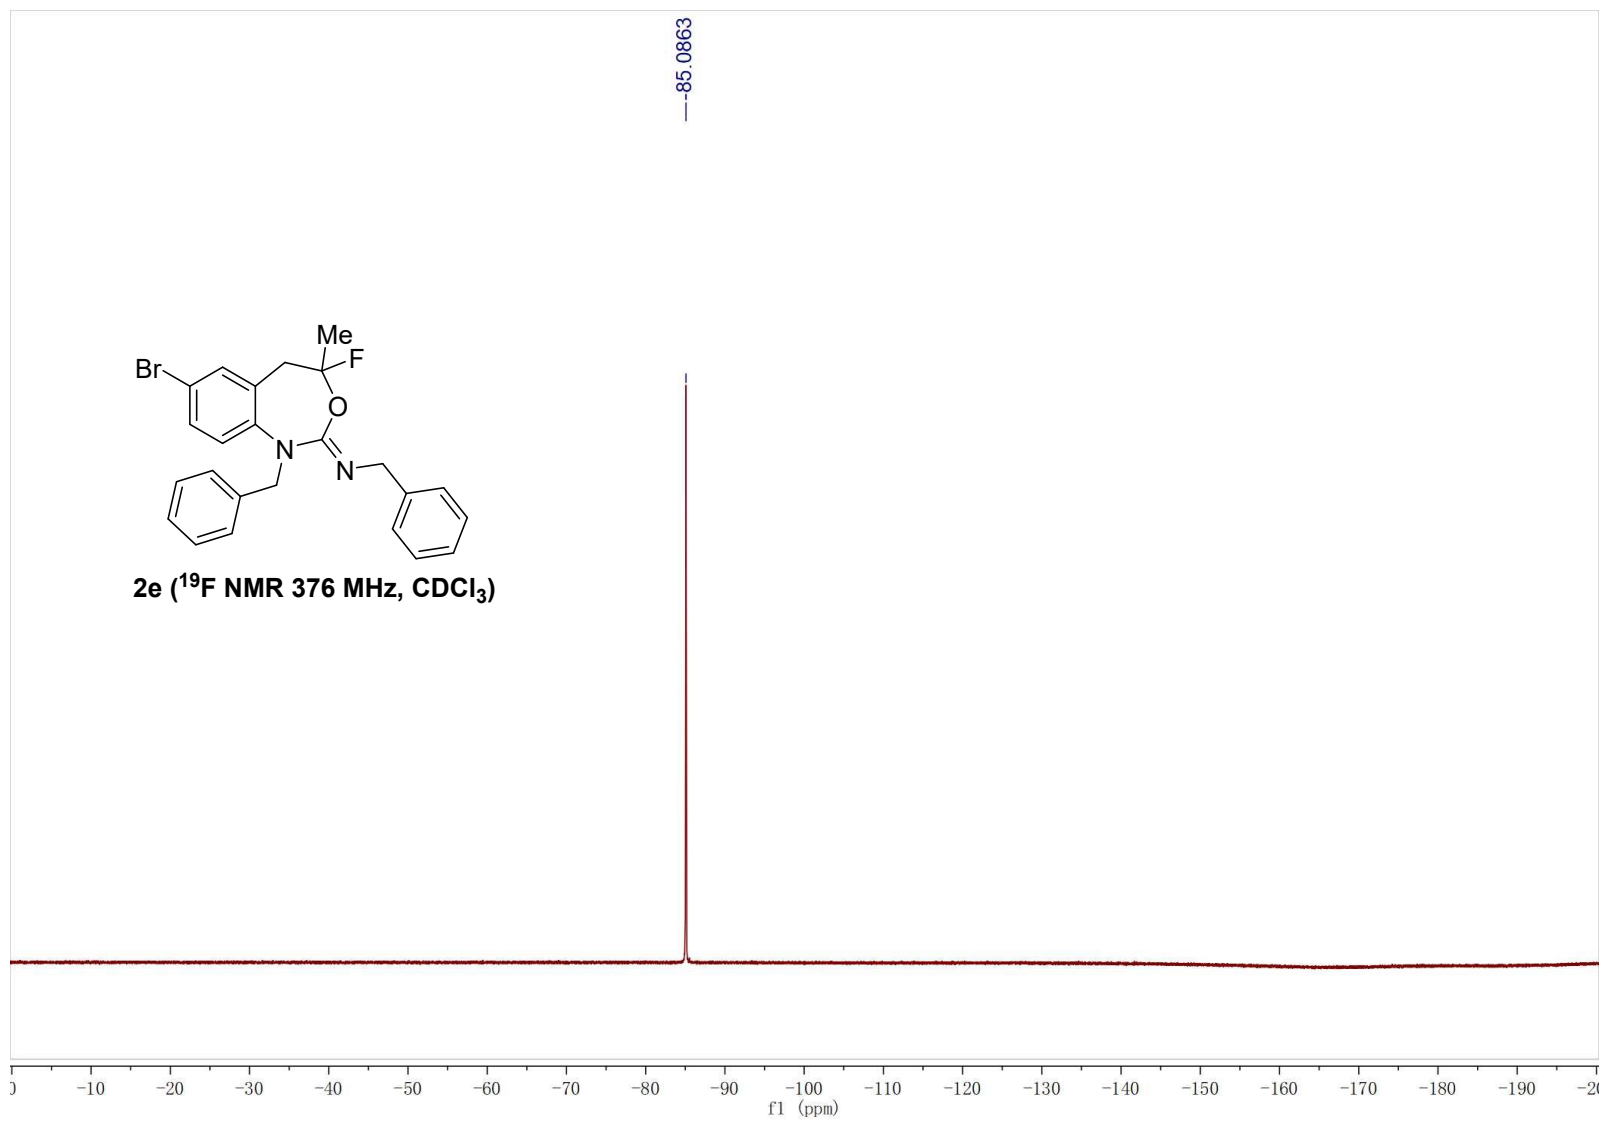



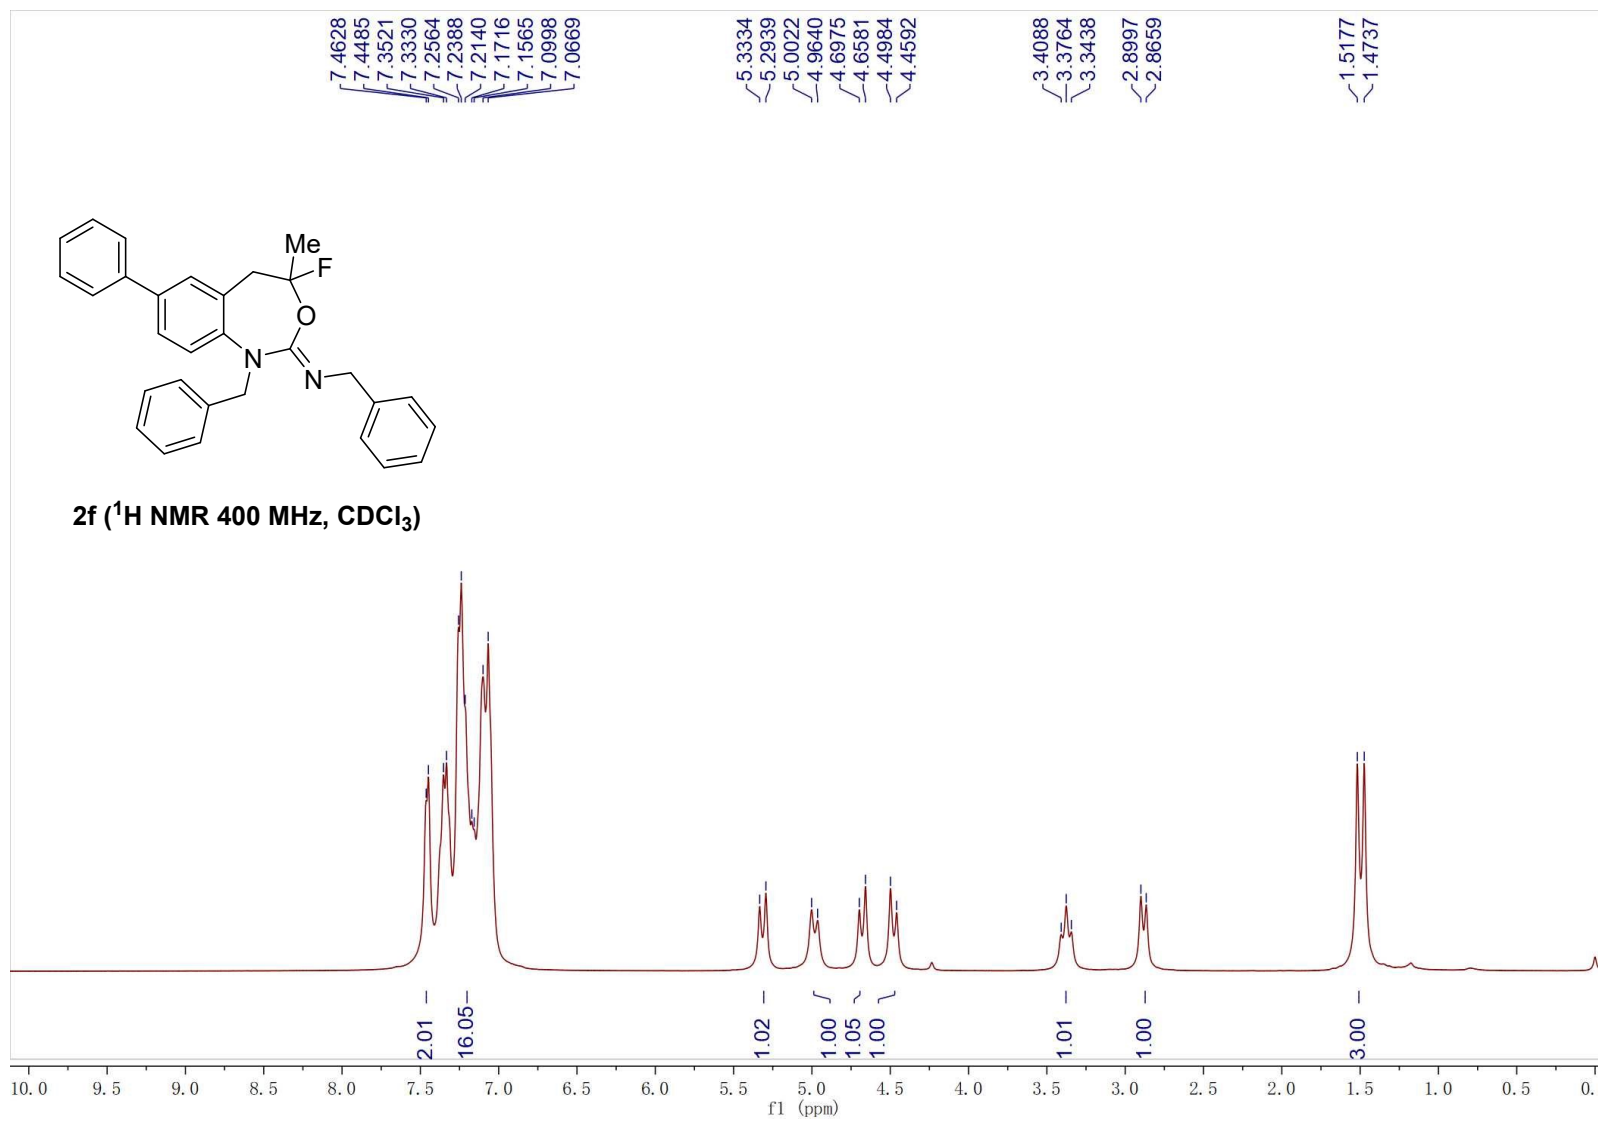

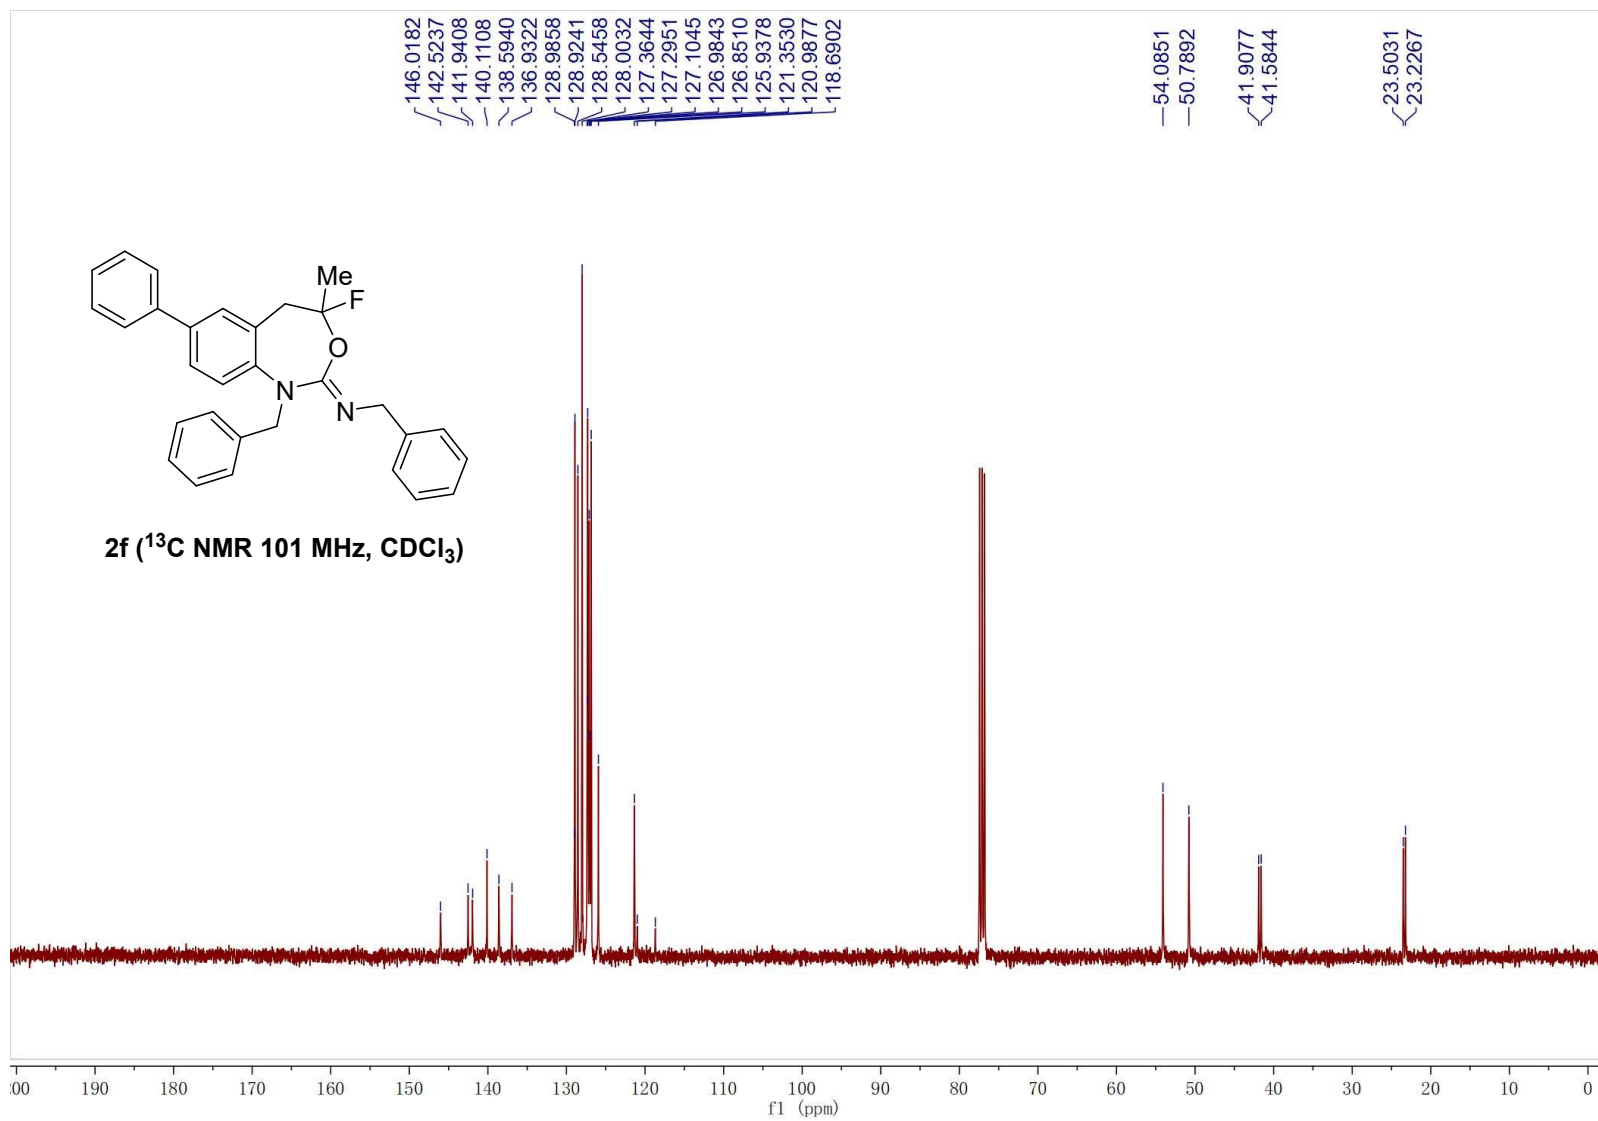

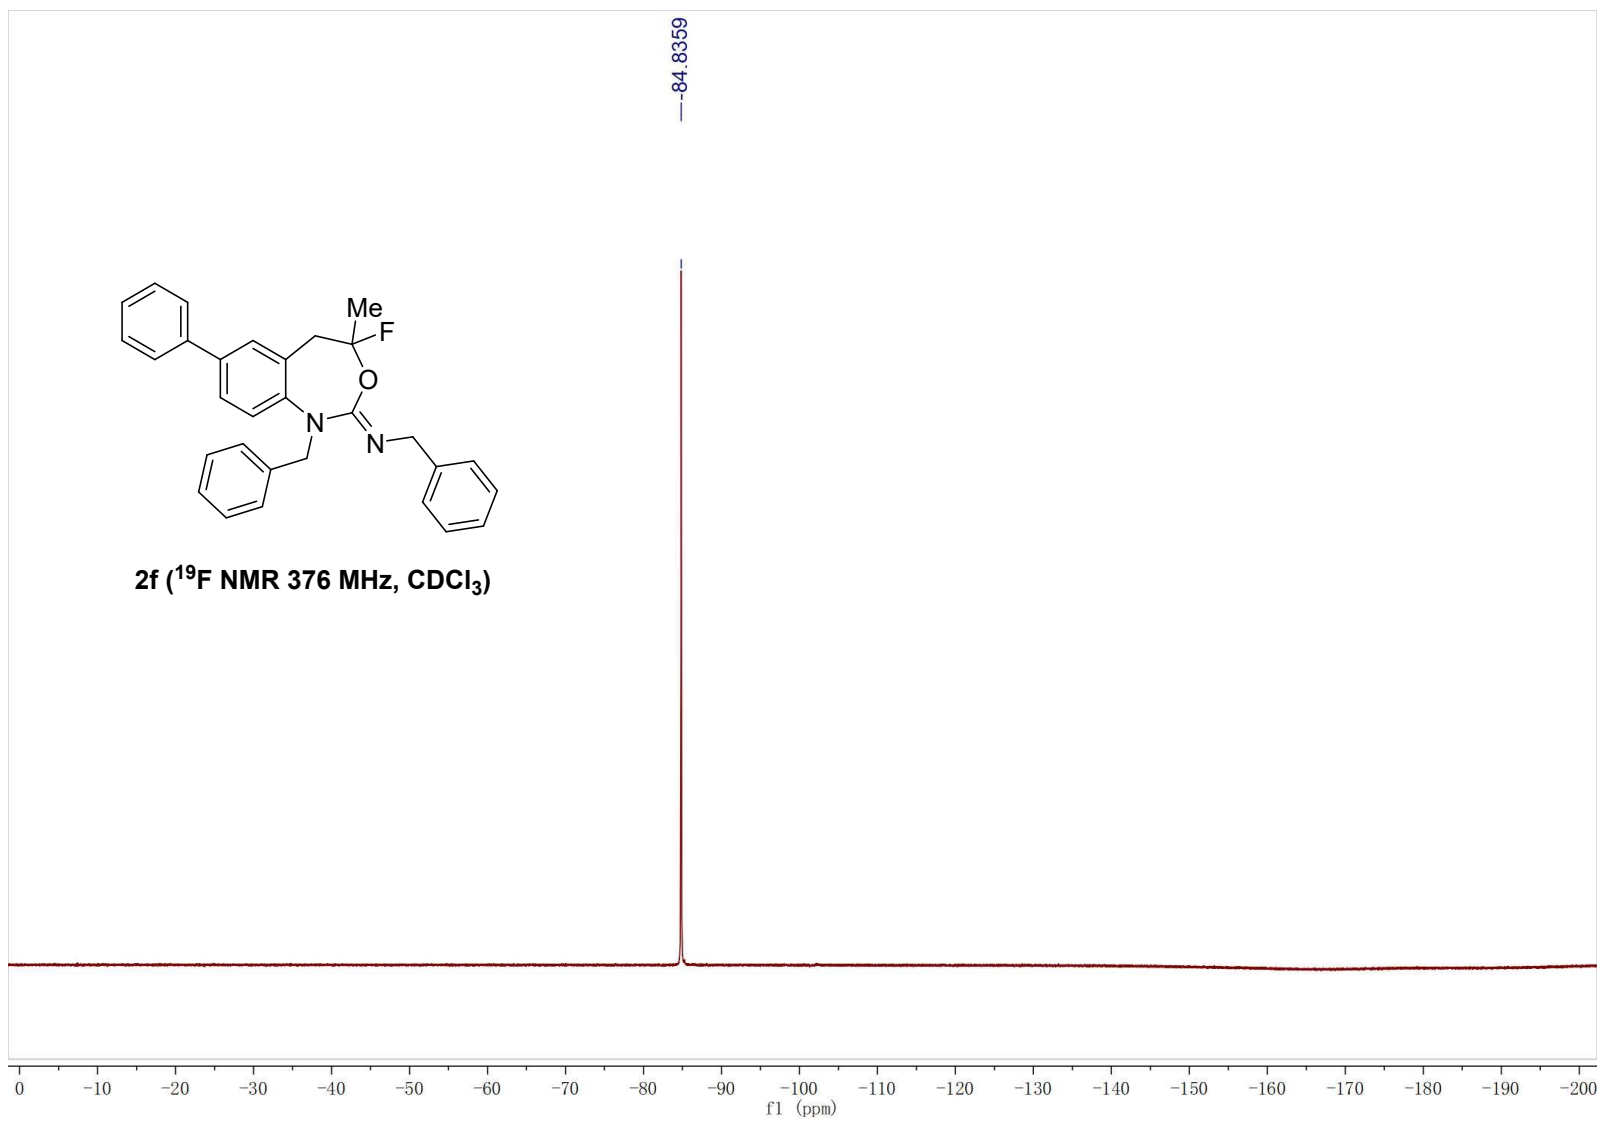

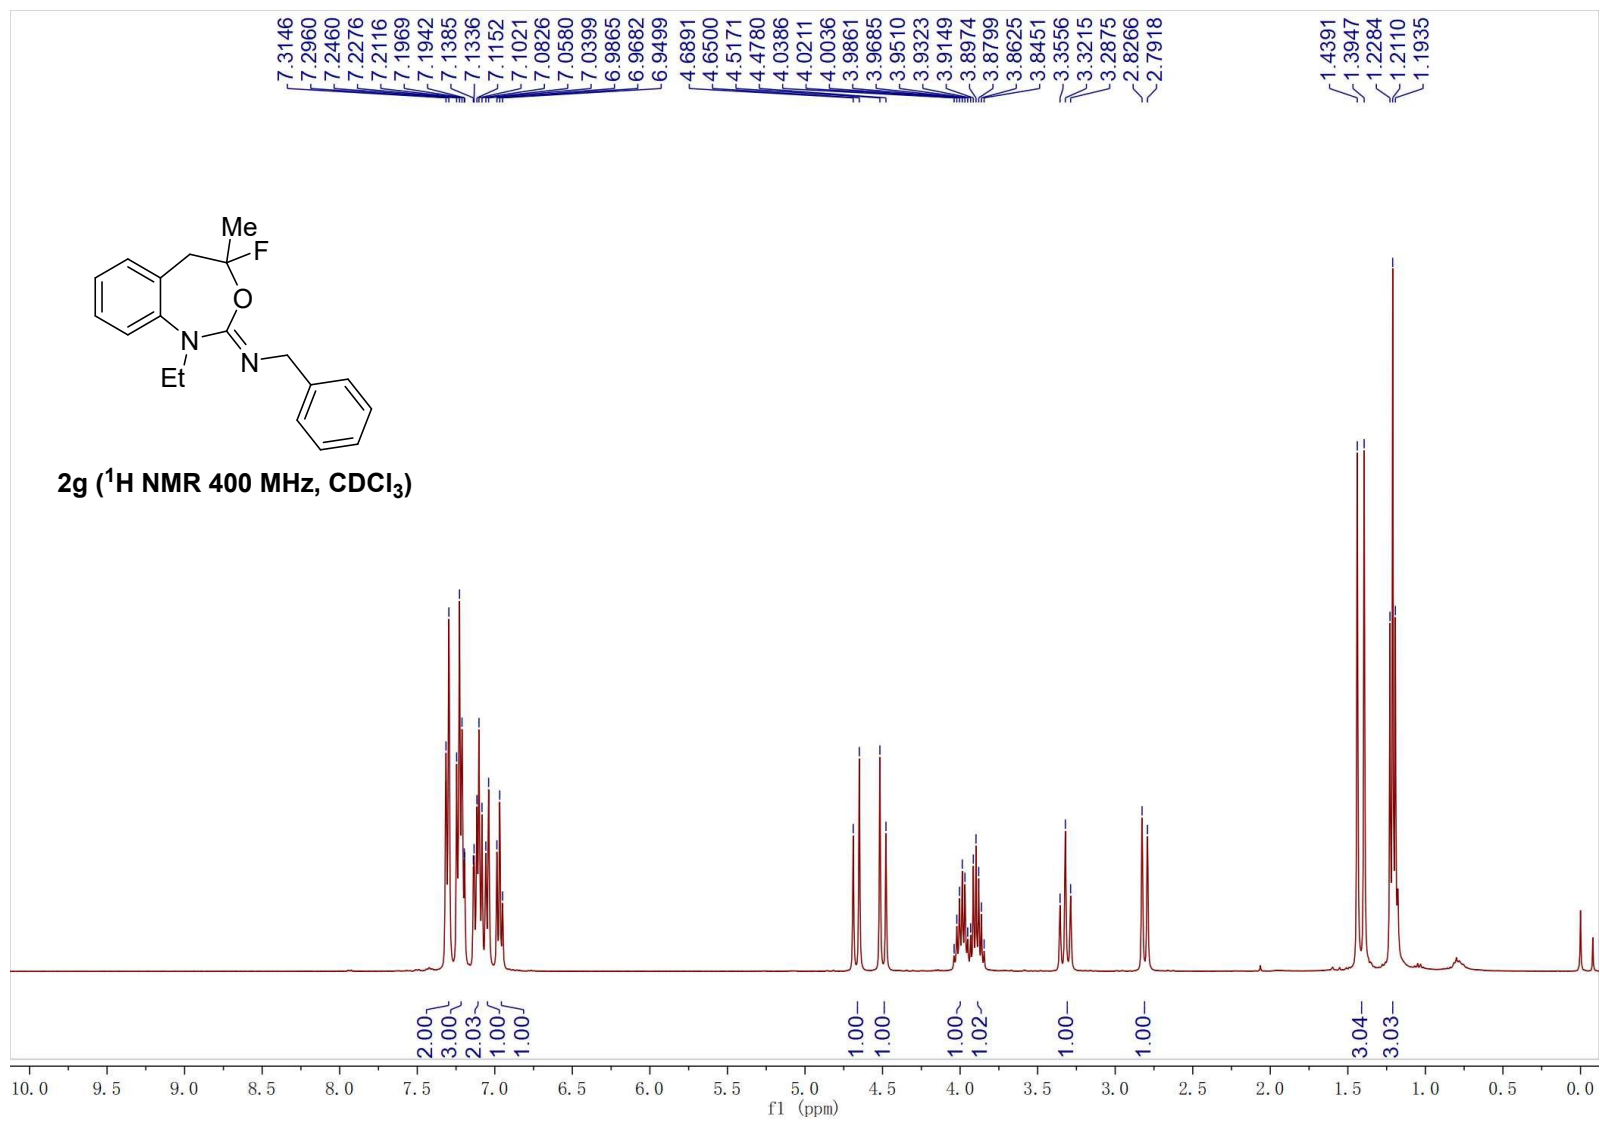

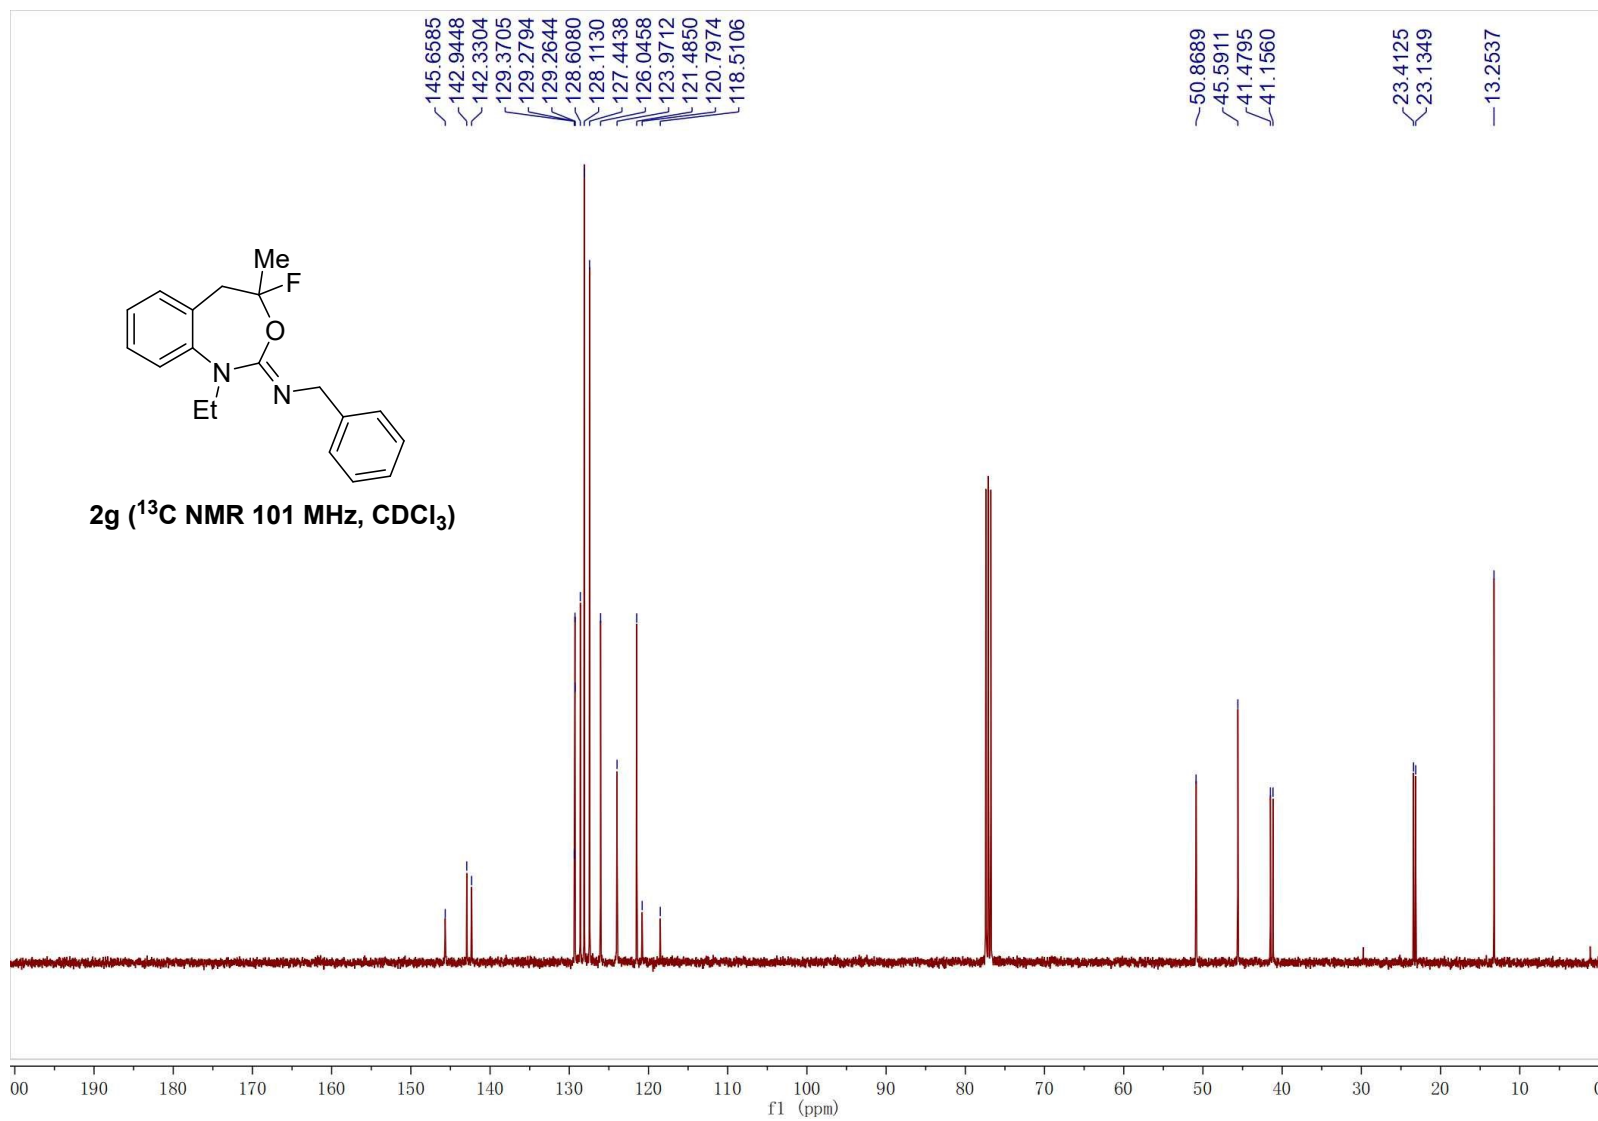

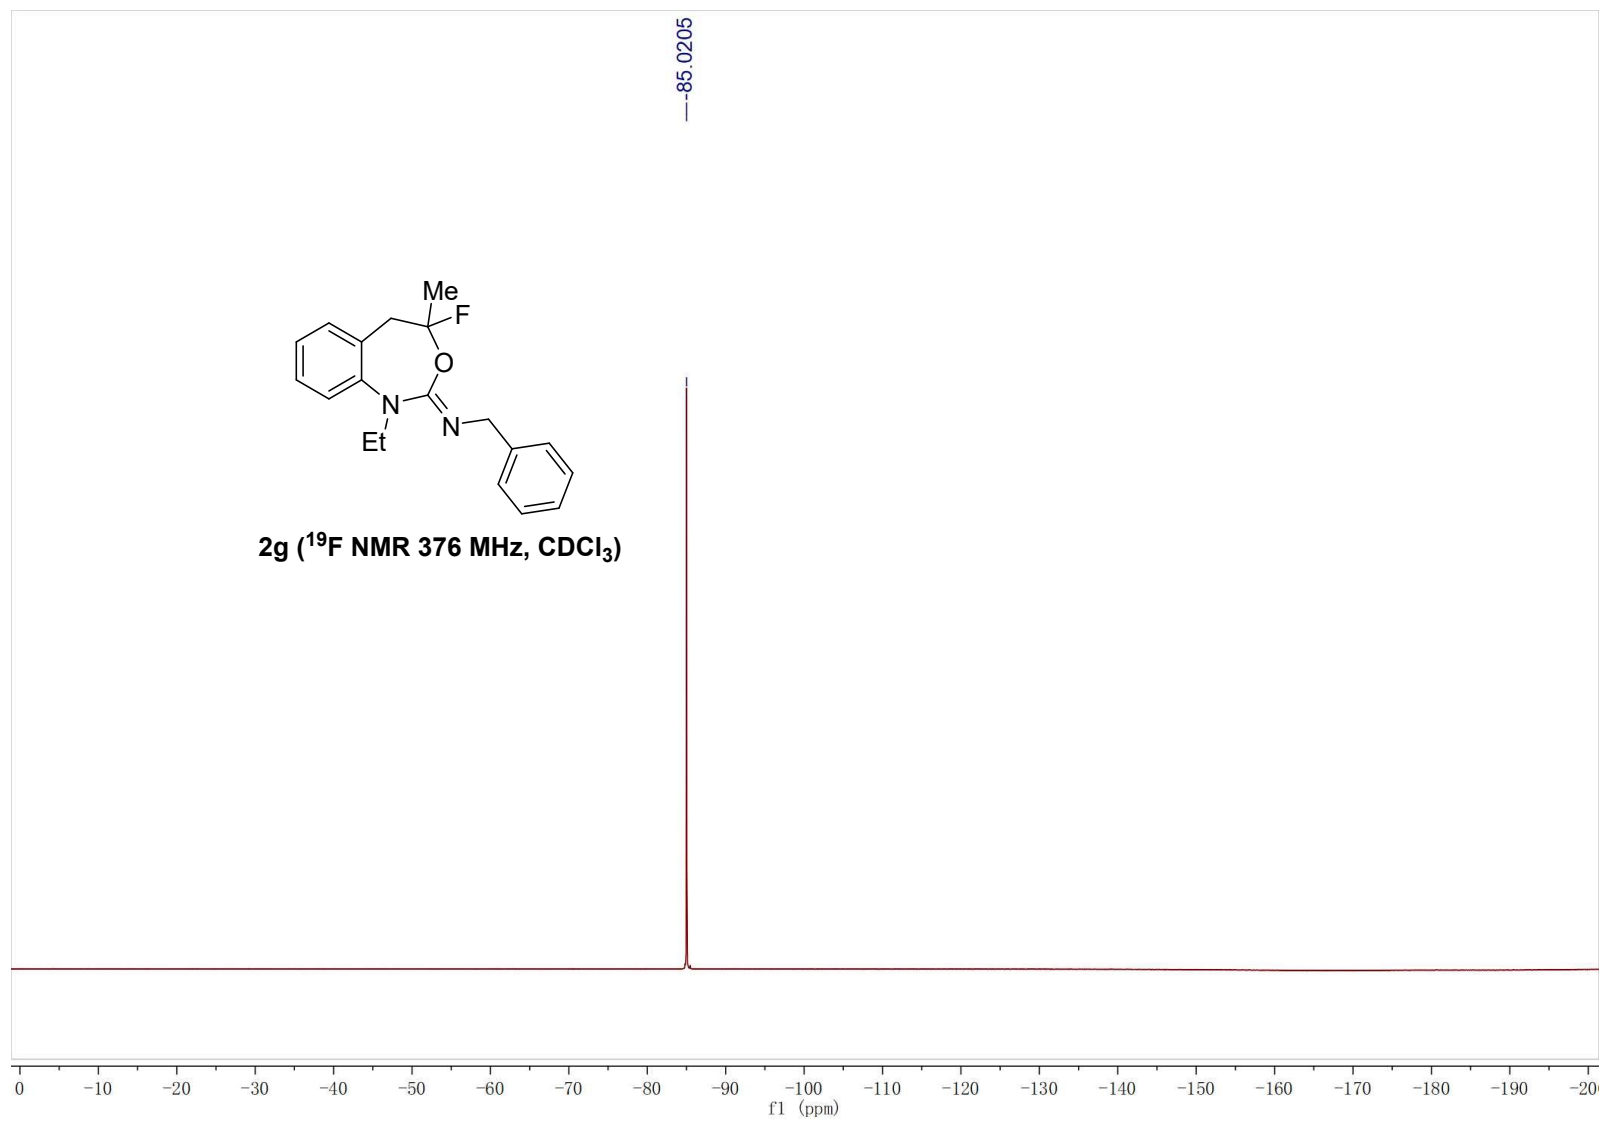

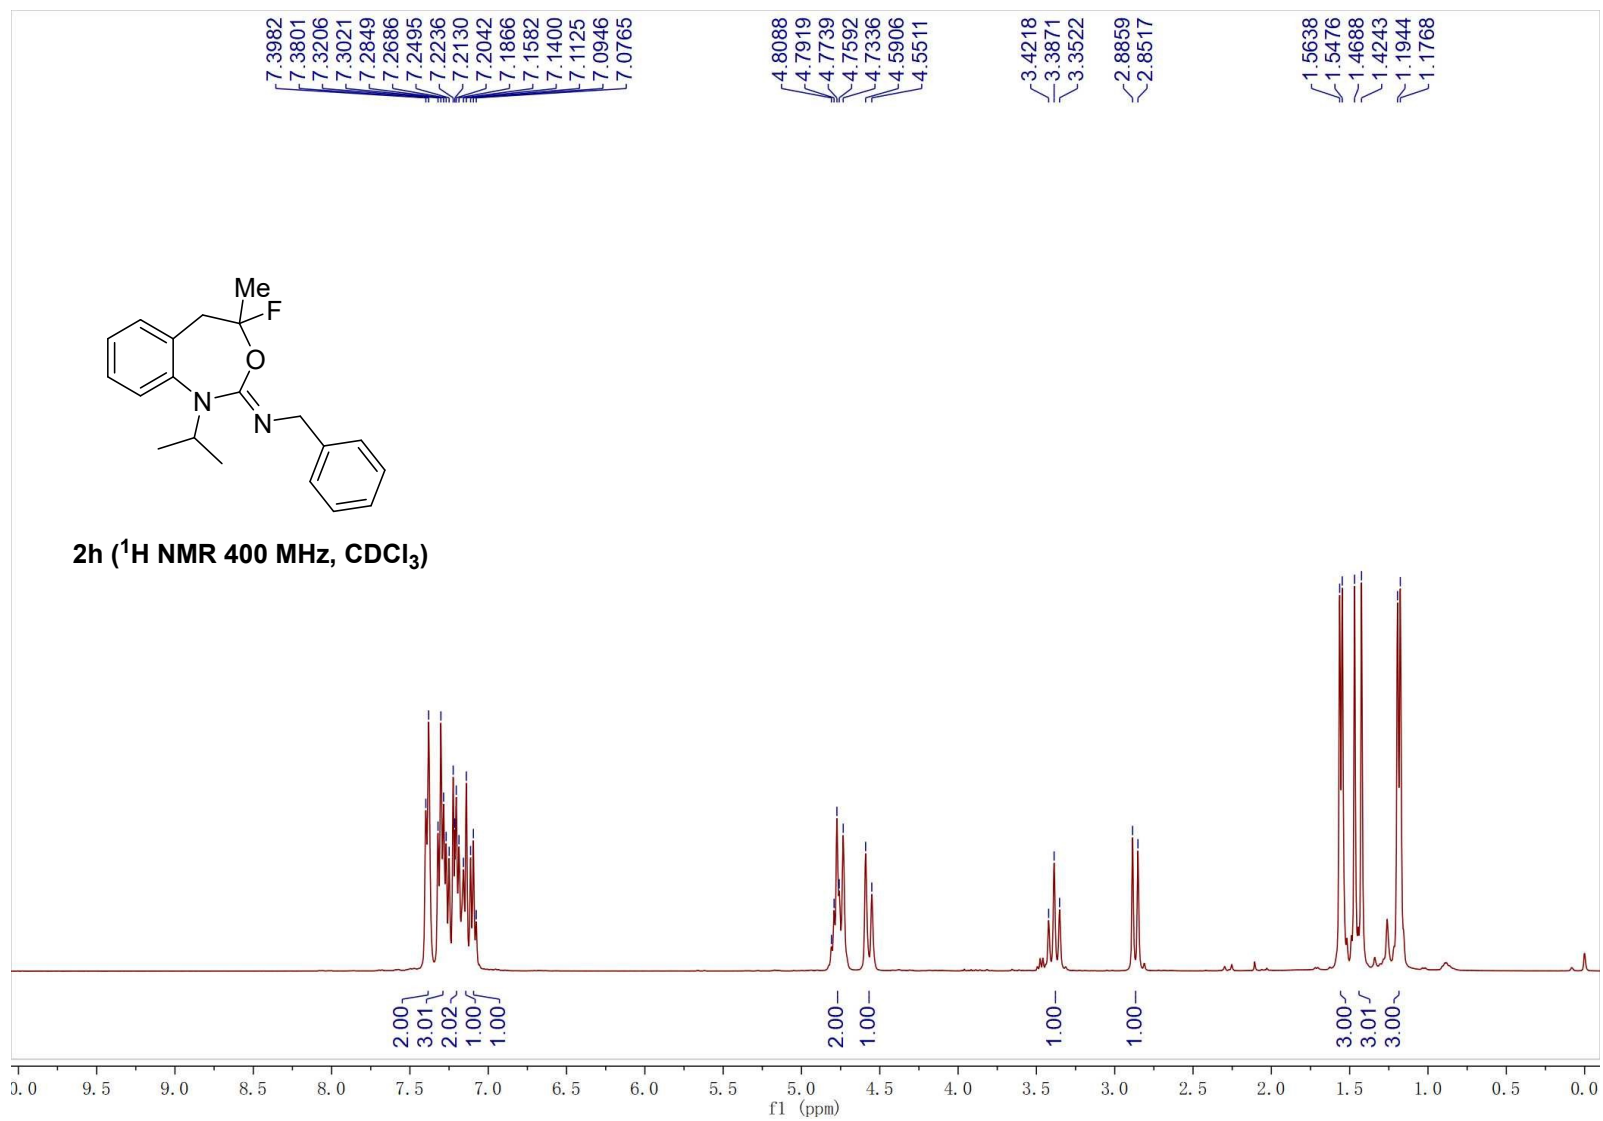

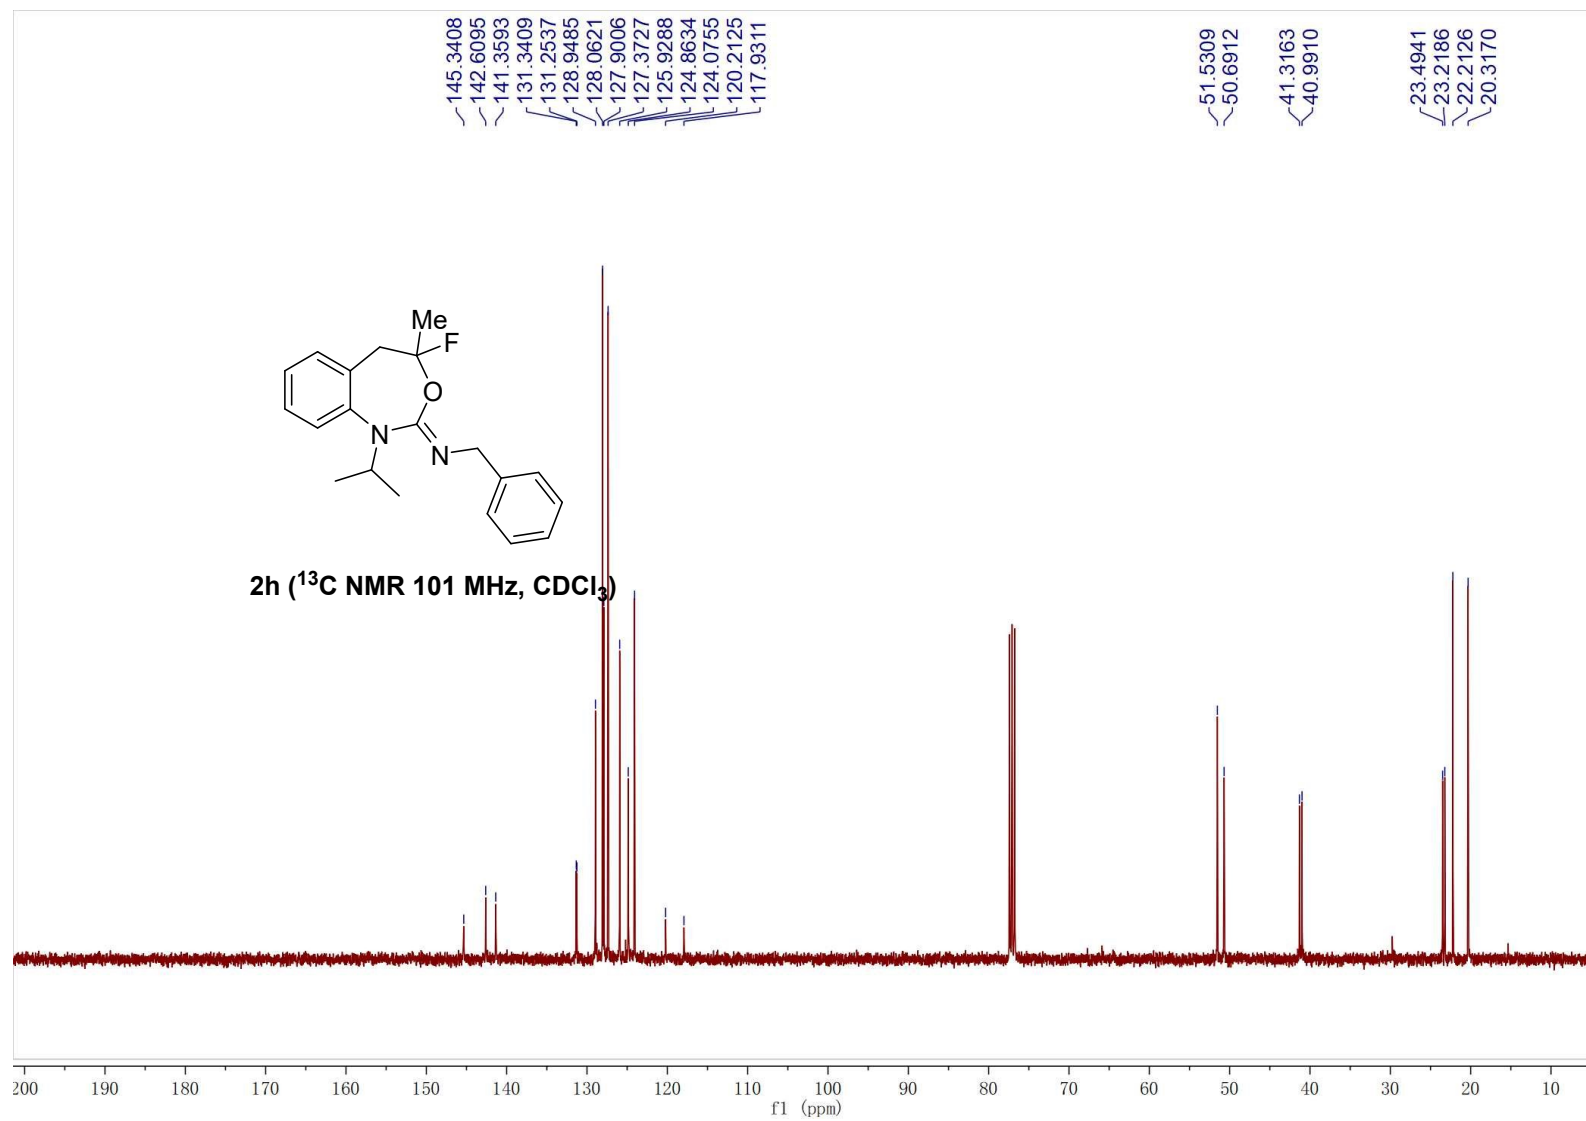



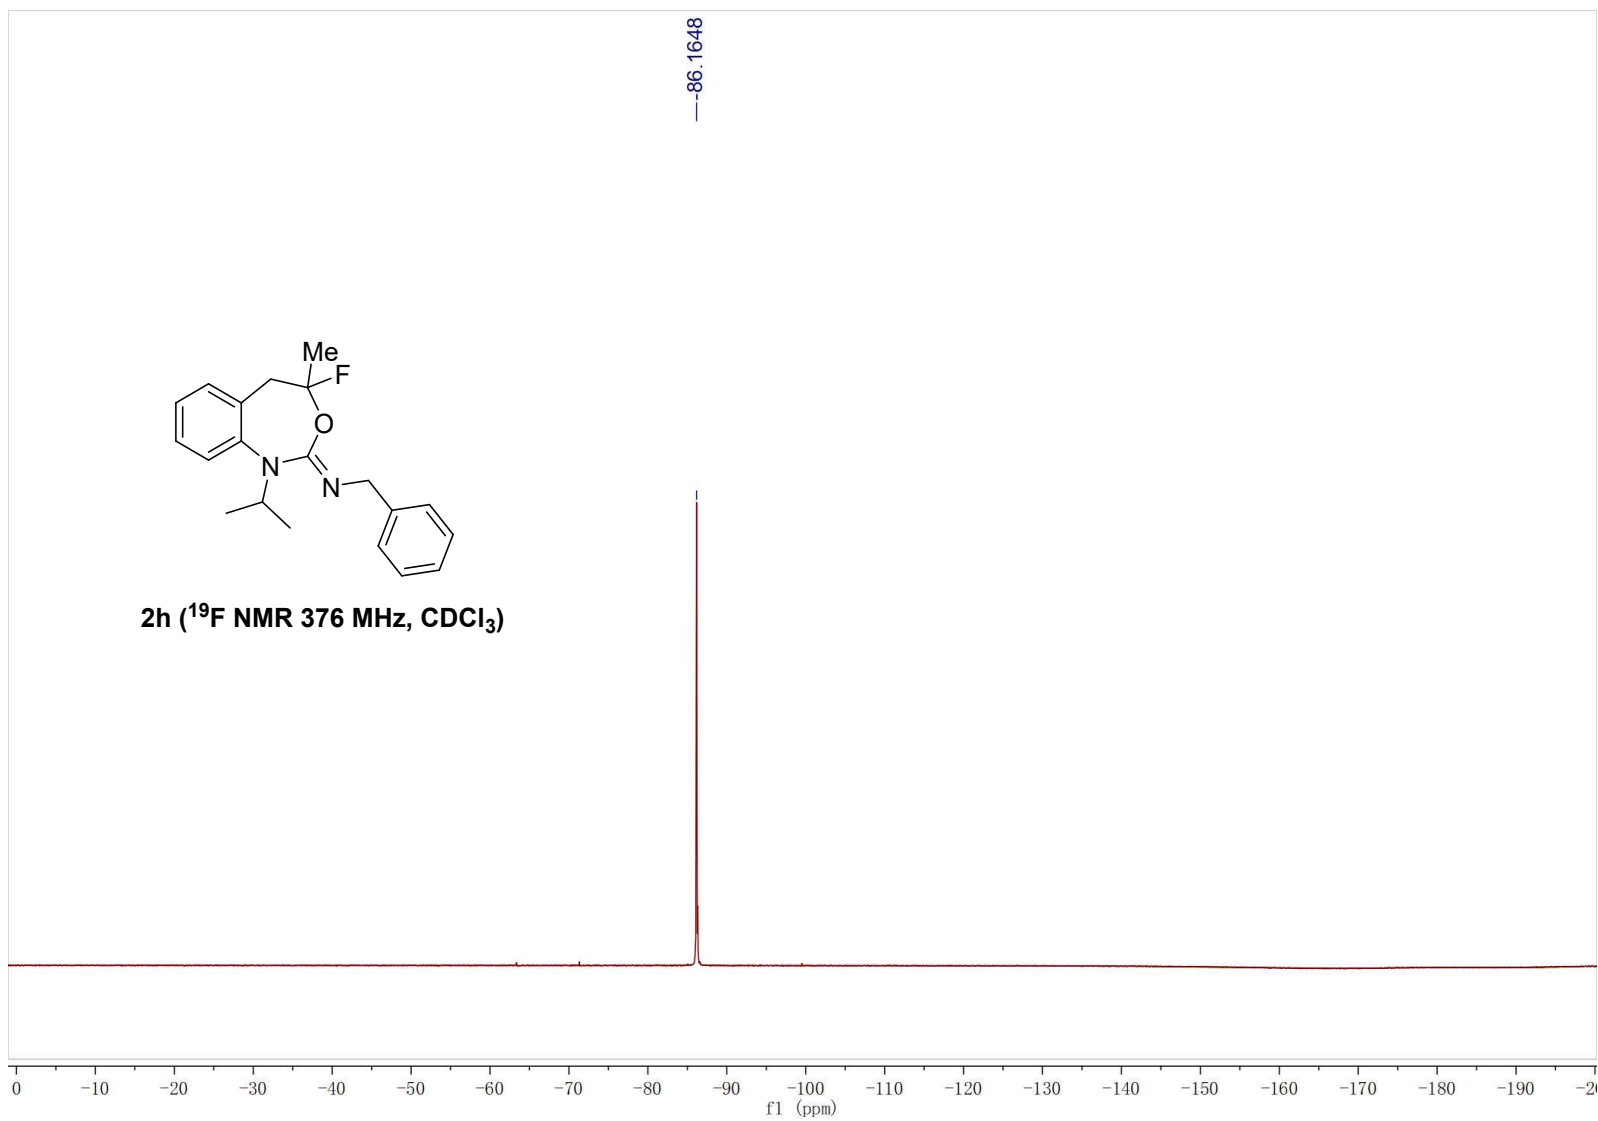

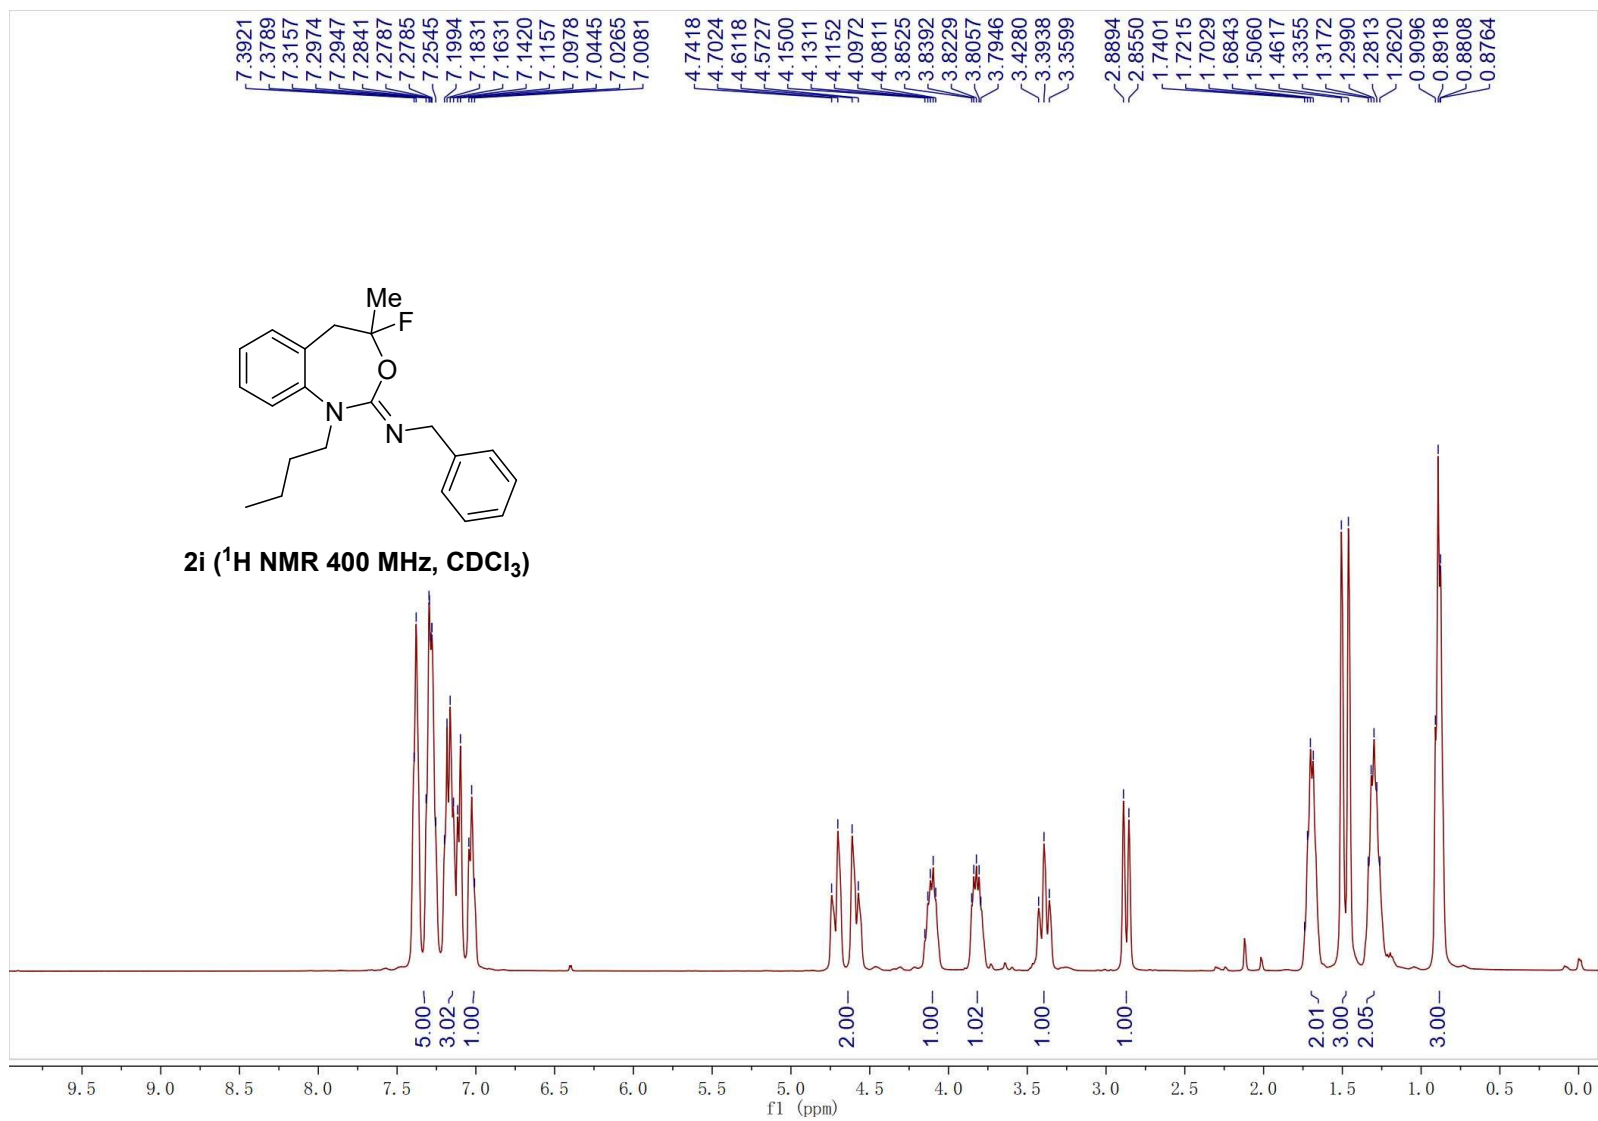

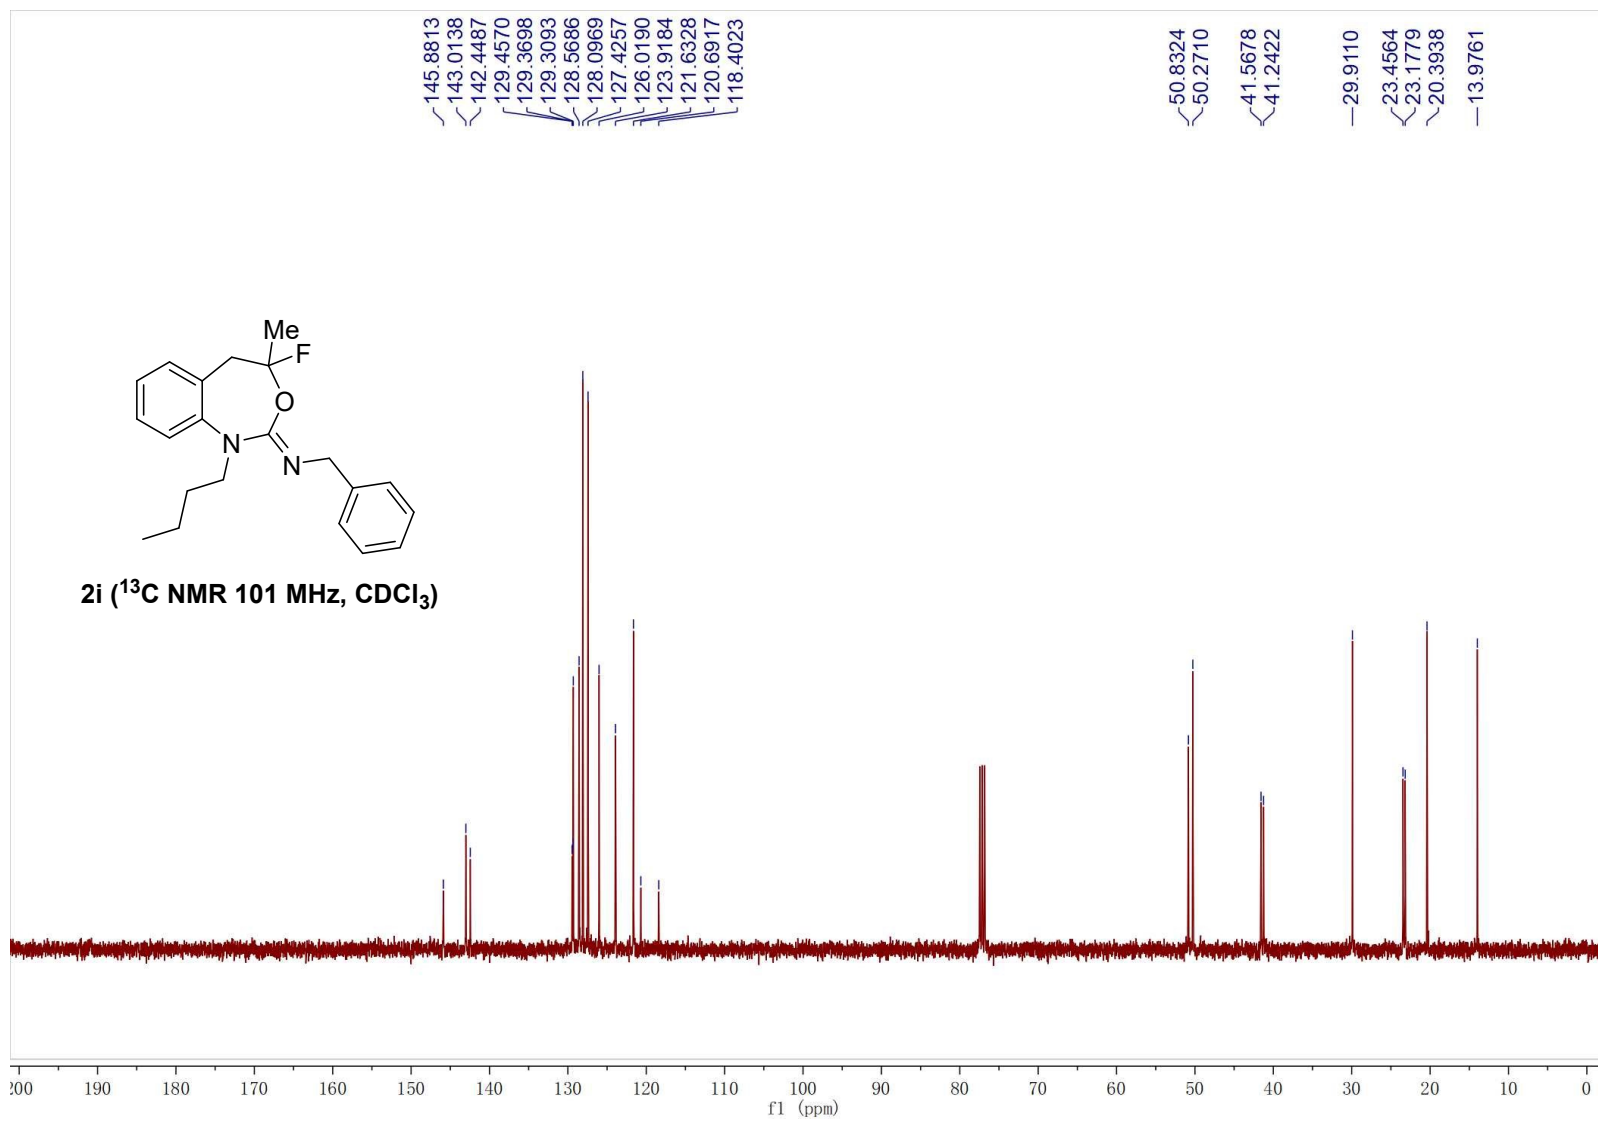

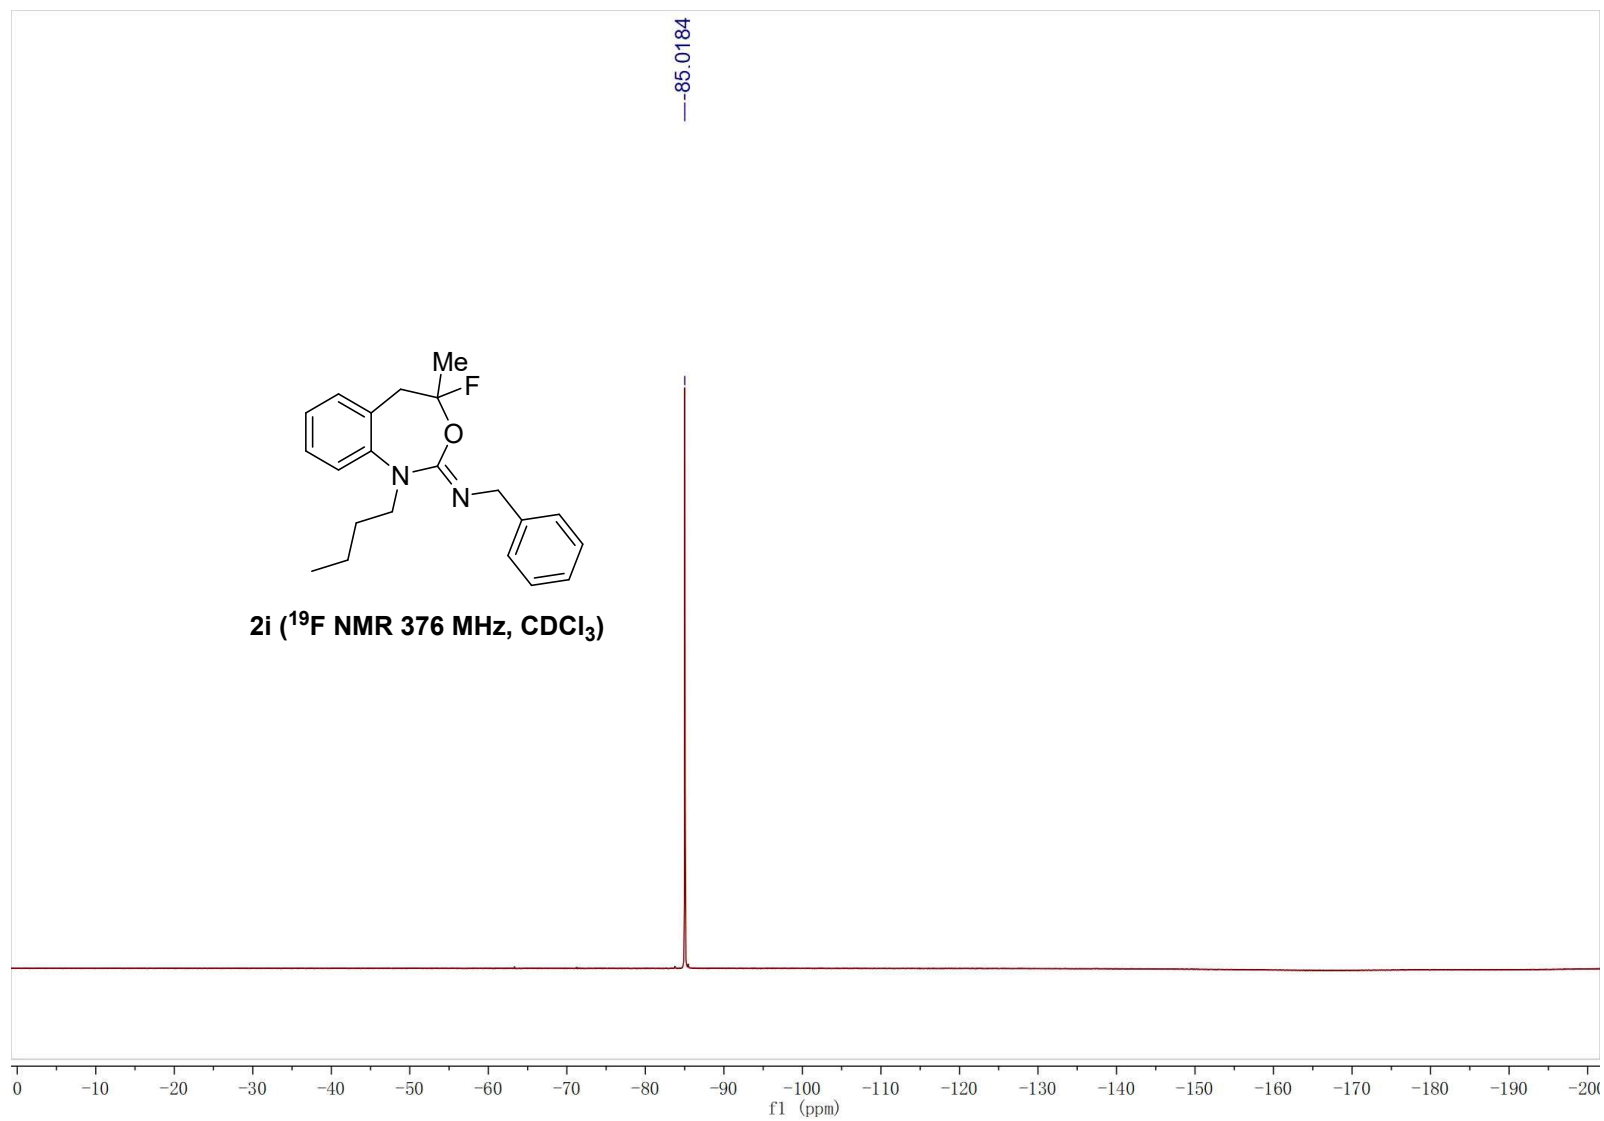

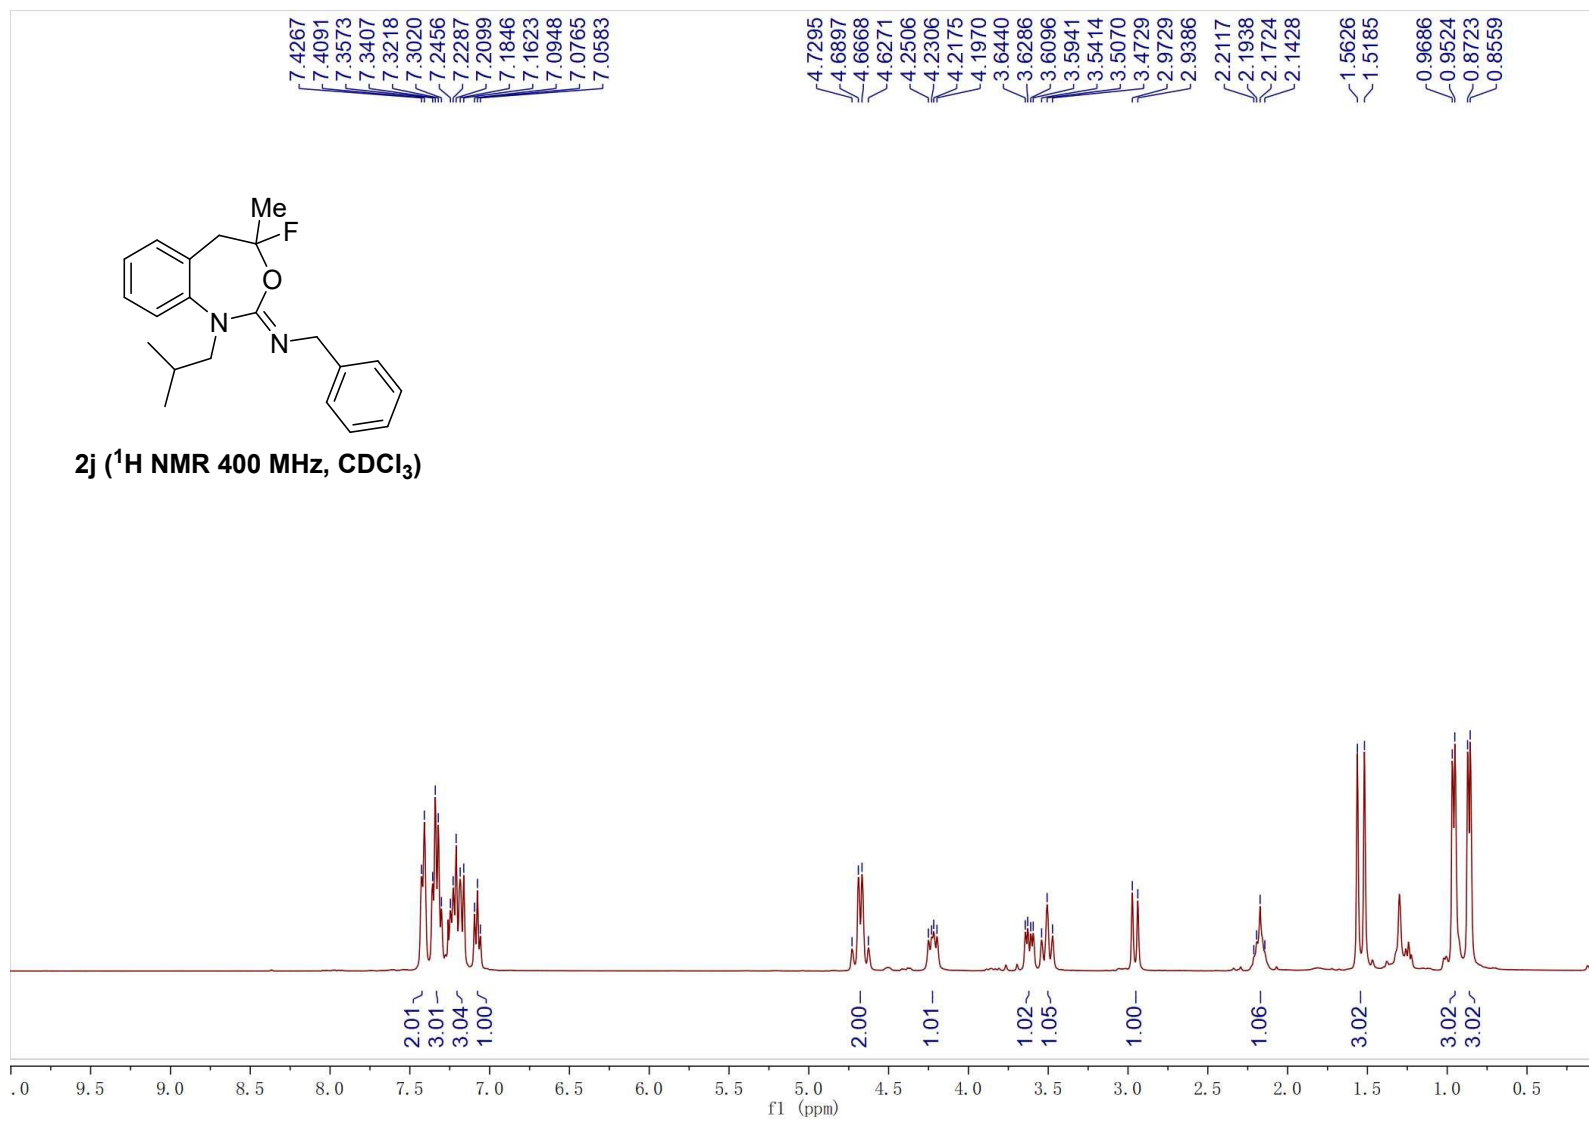

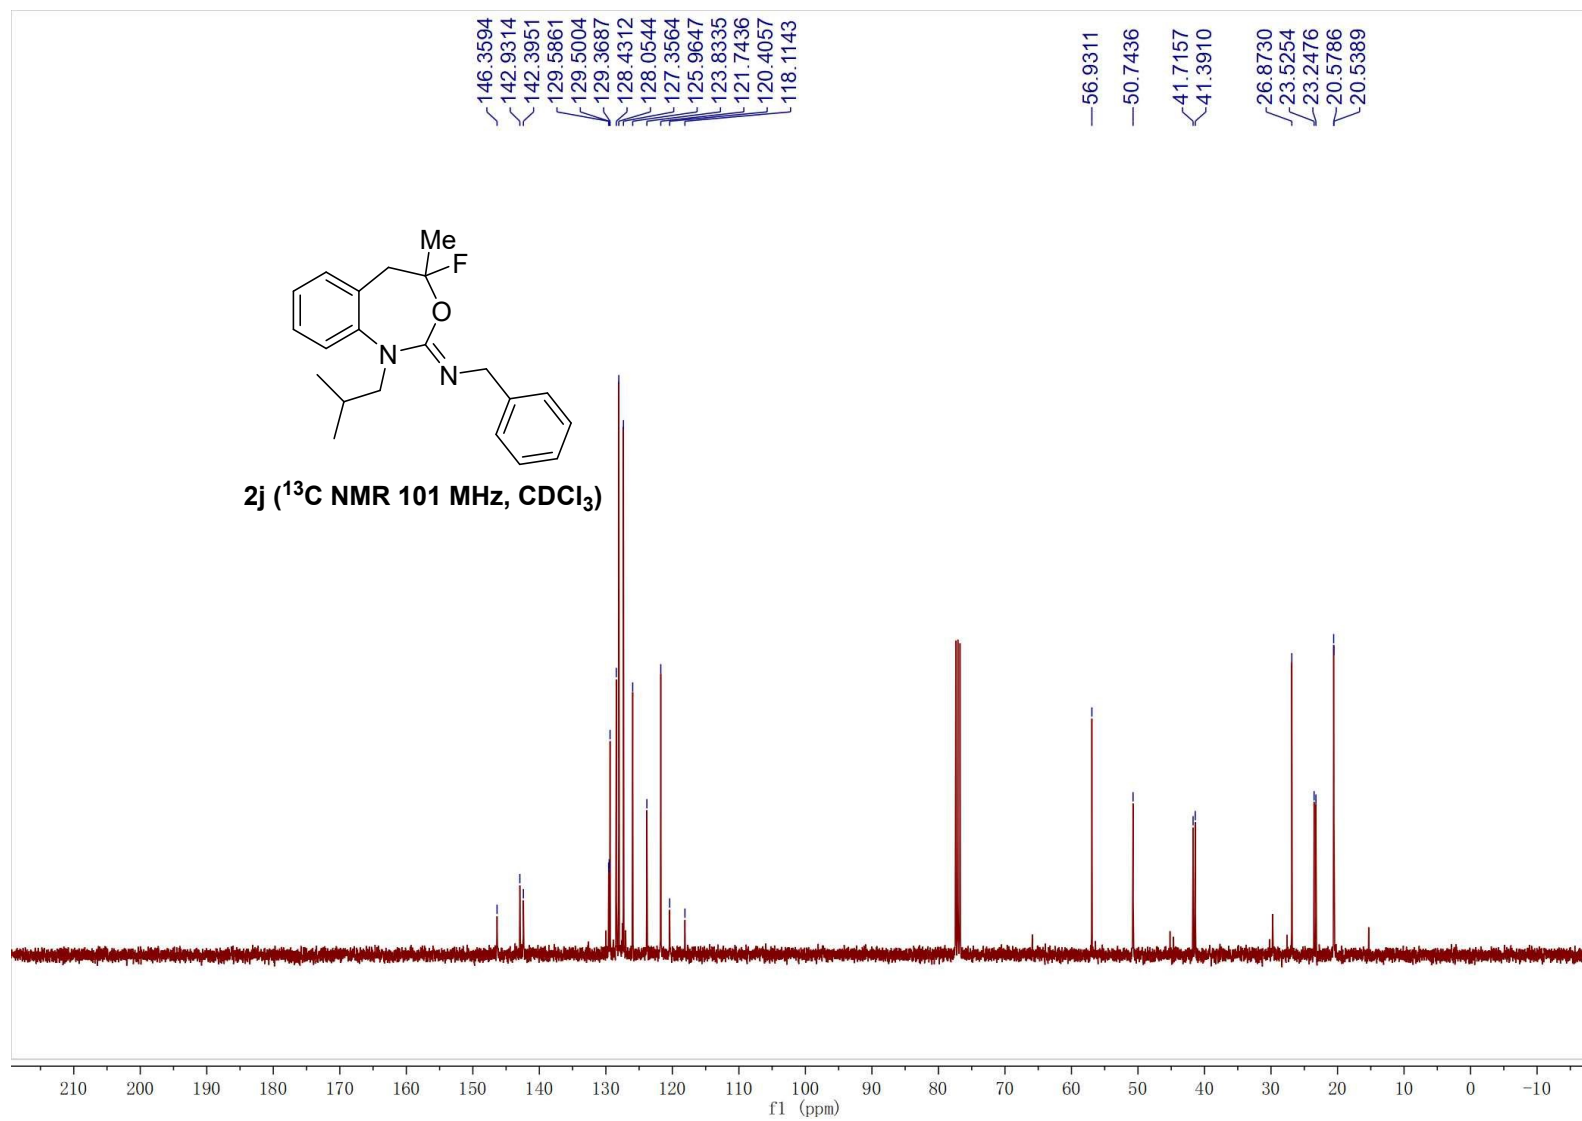

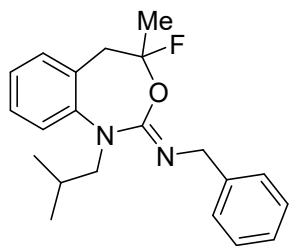

2j ( $^{19}\text{F}$  NMR 376 MHz,  $\text{CDCl}_3$ )

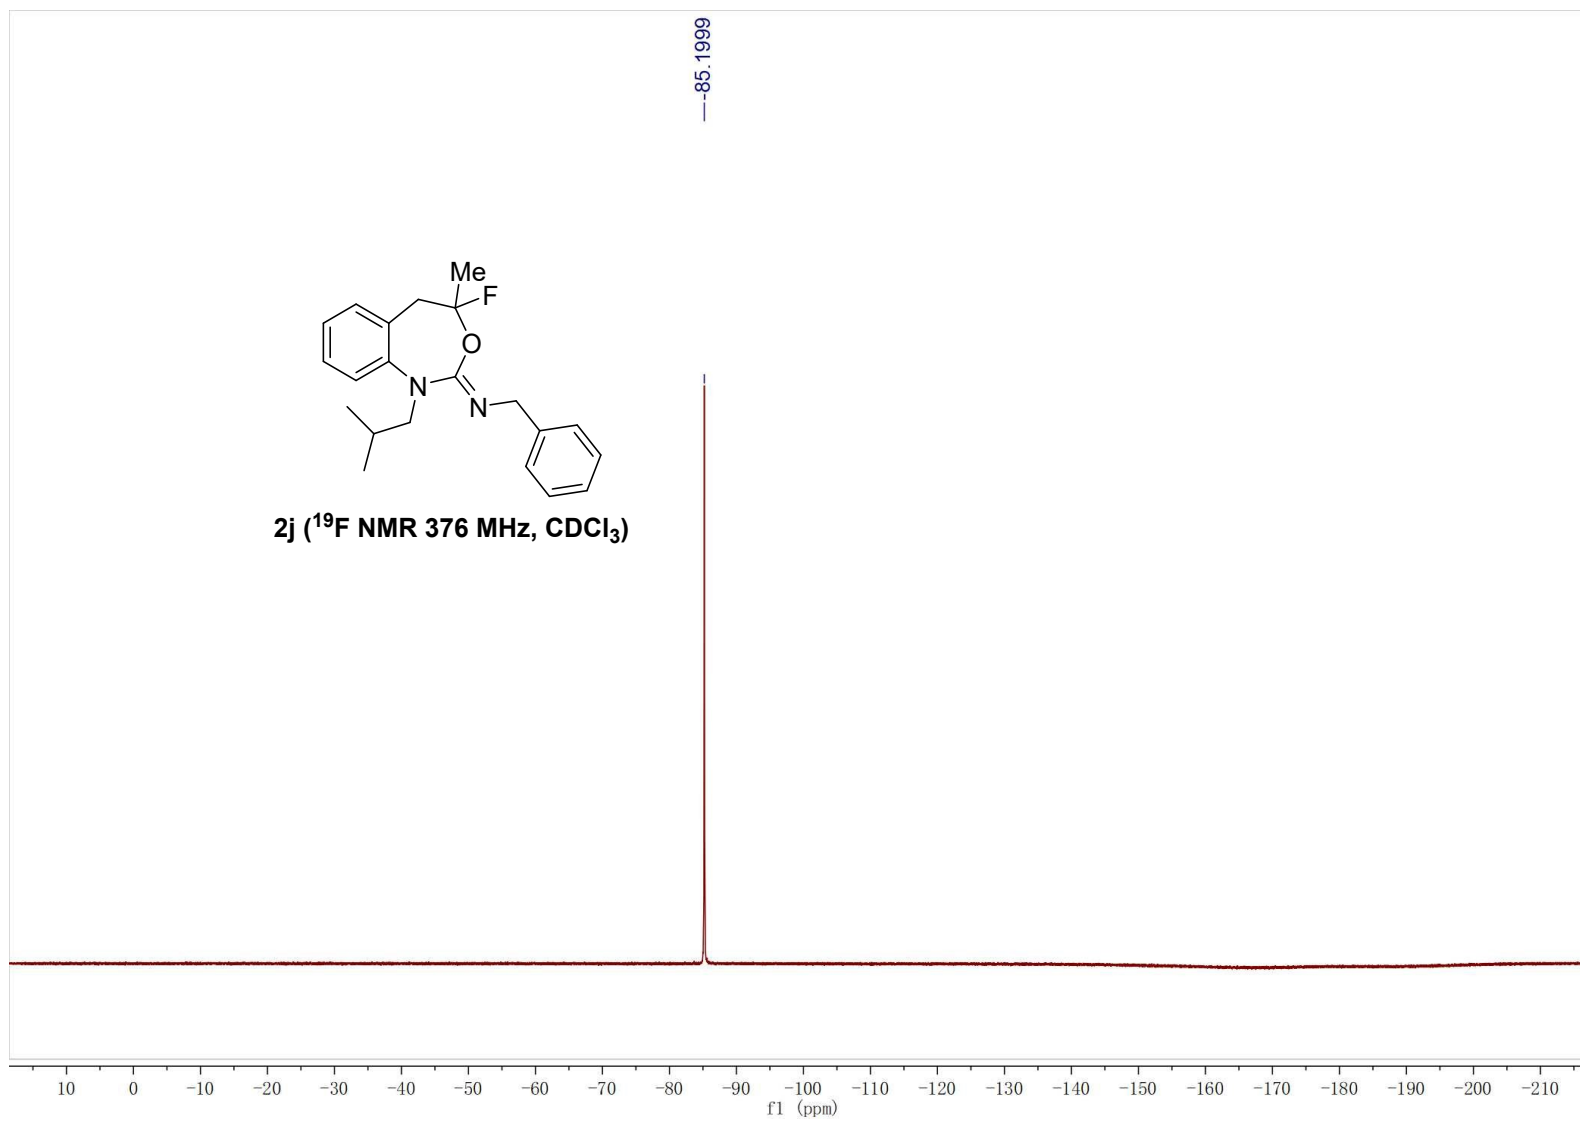

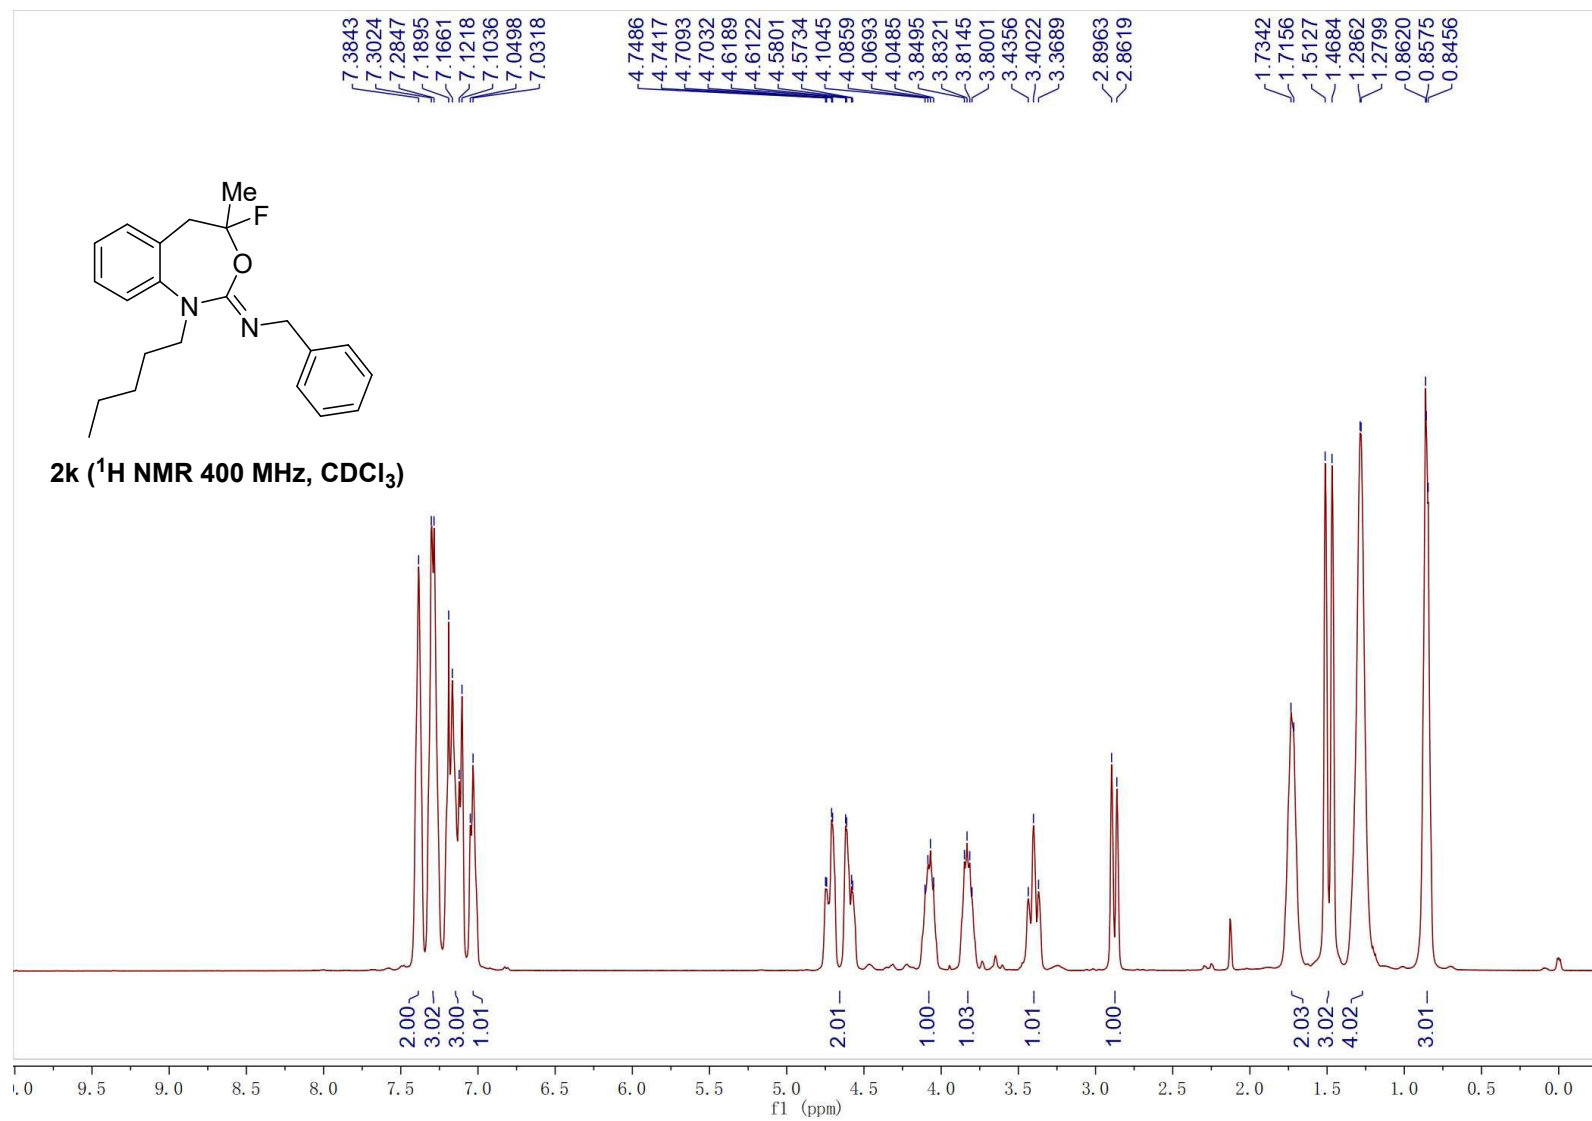



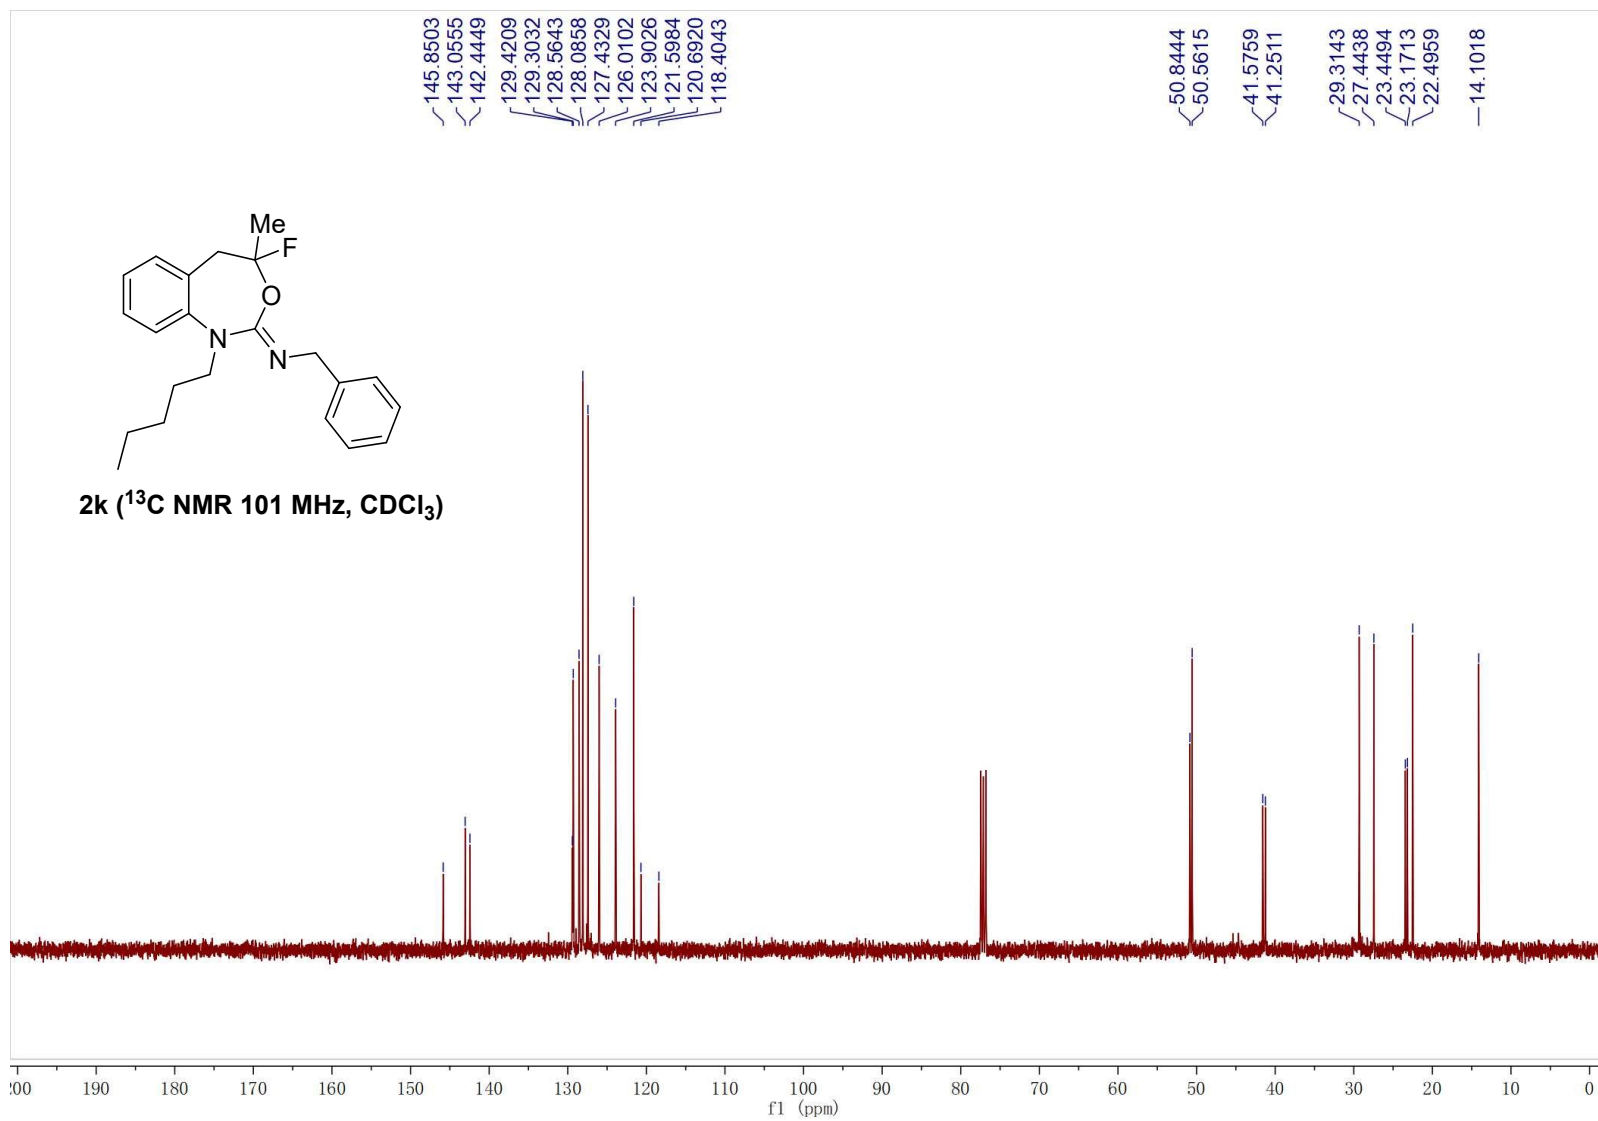

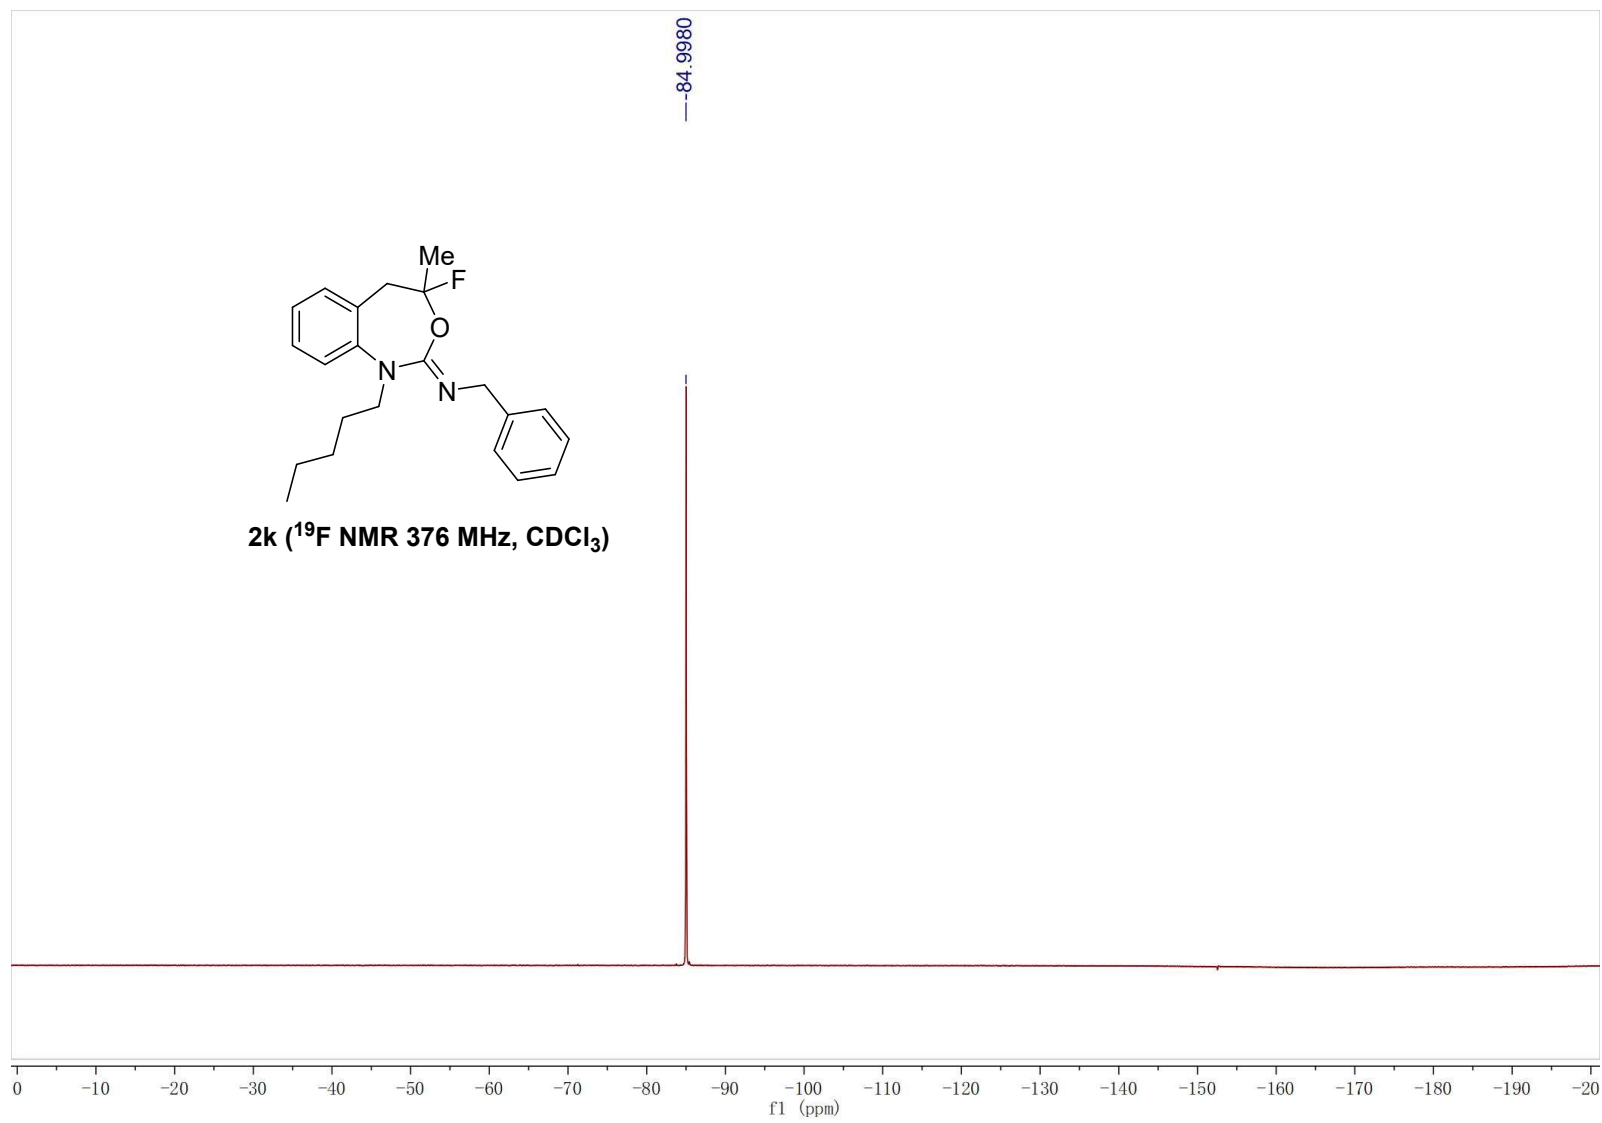

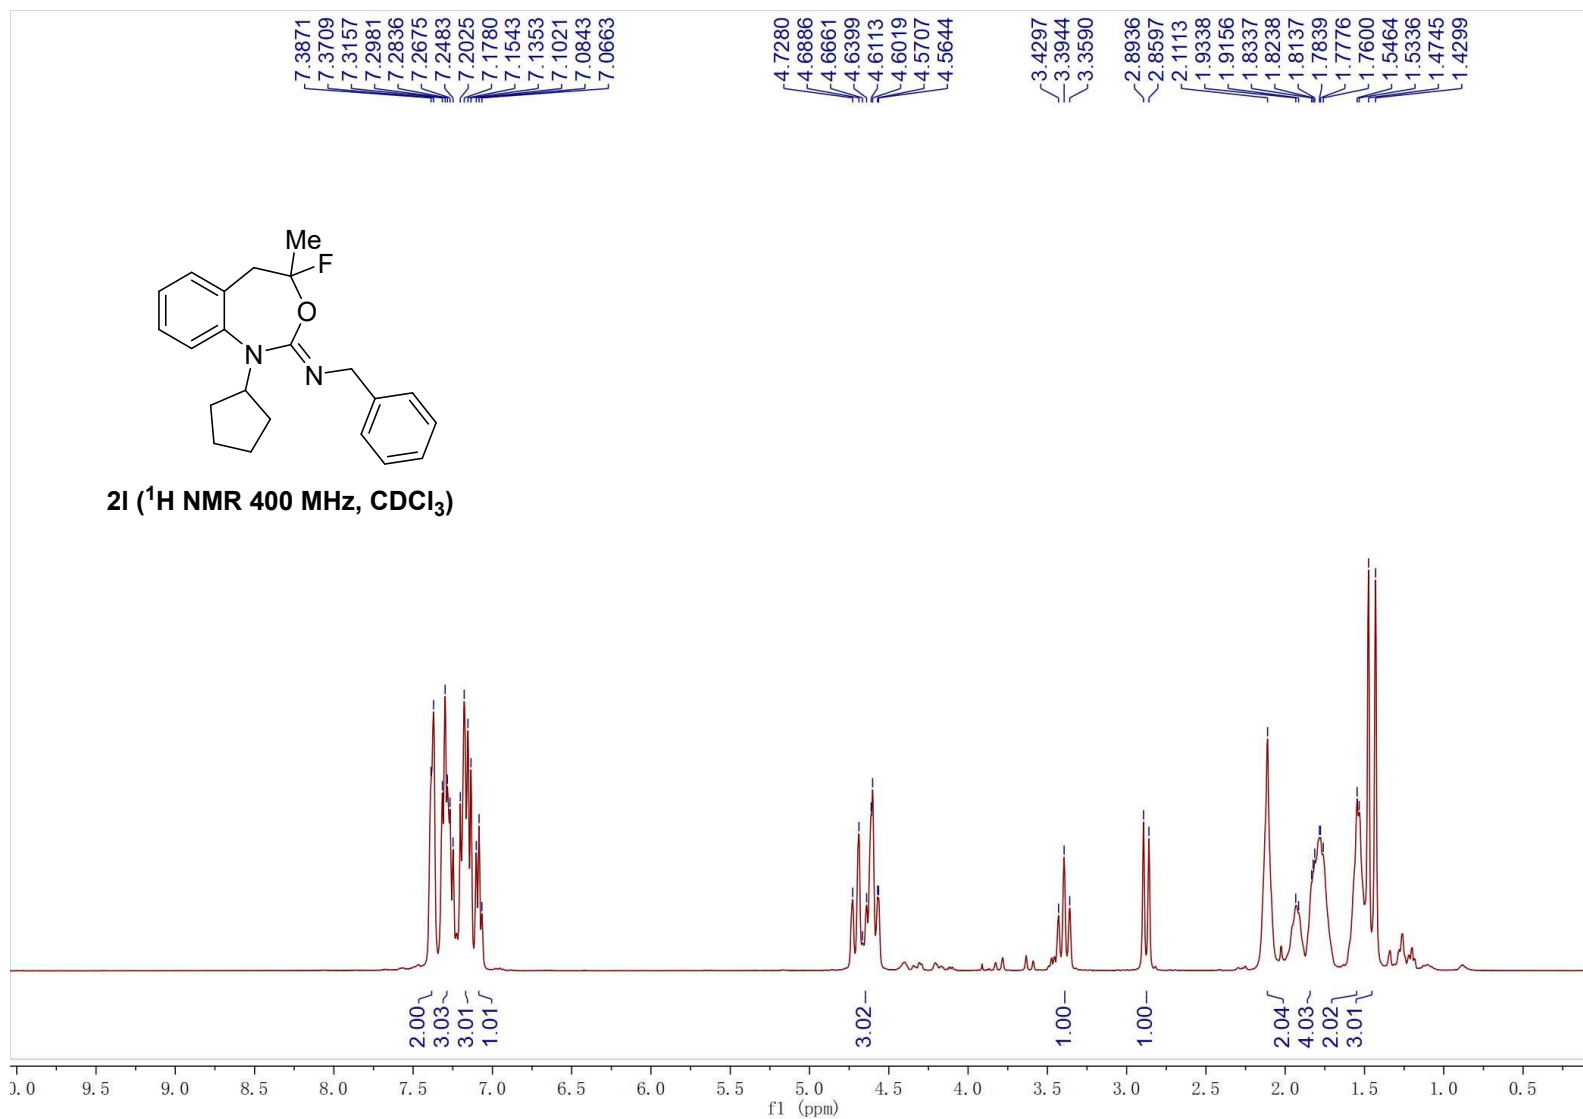

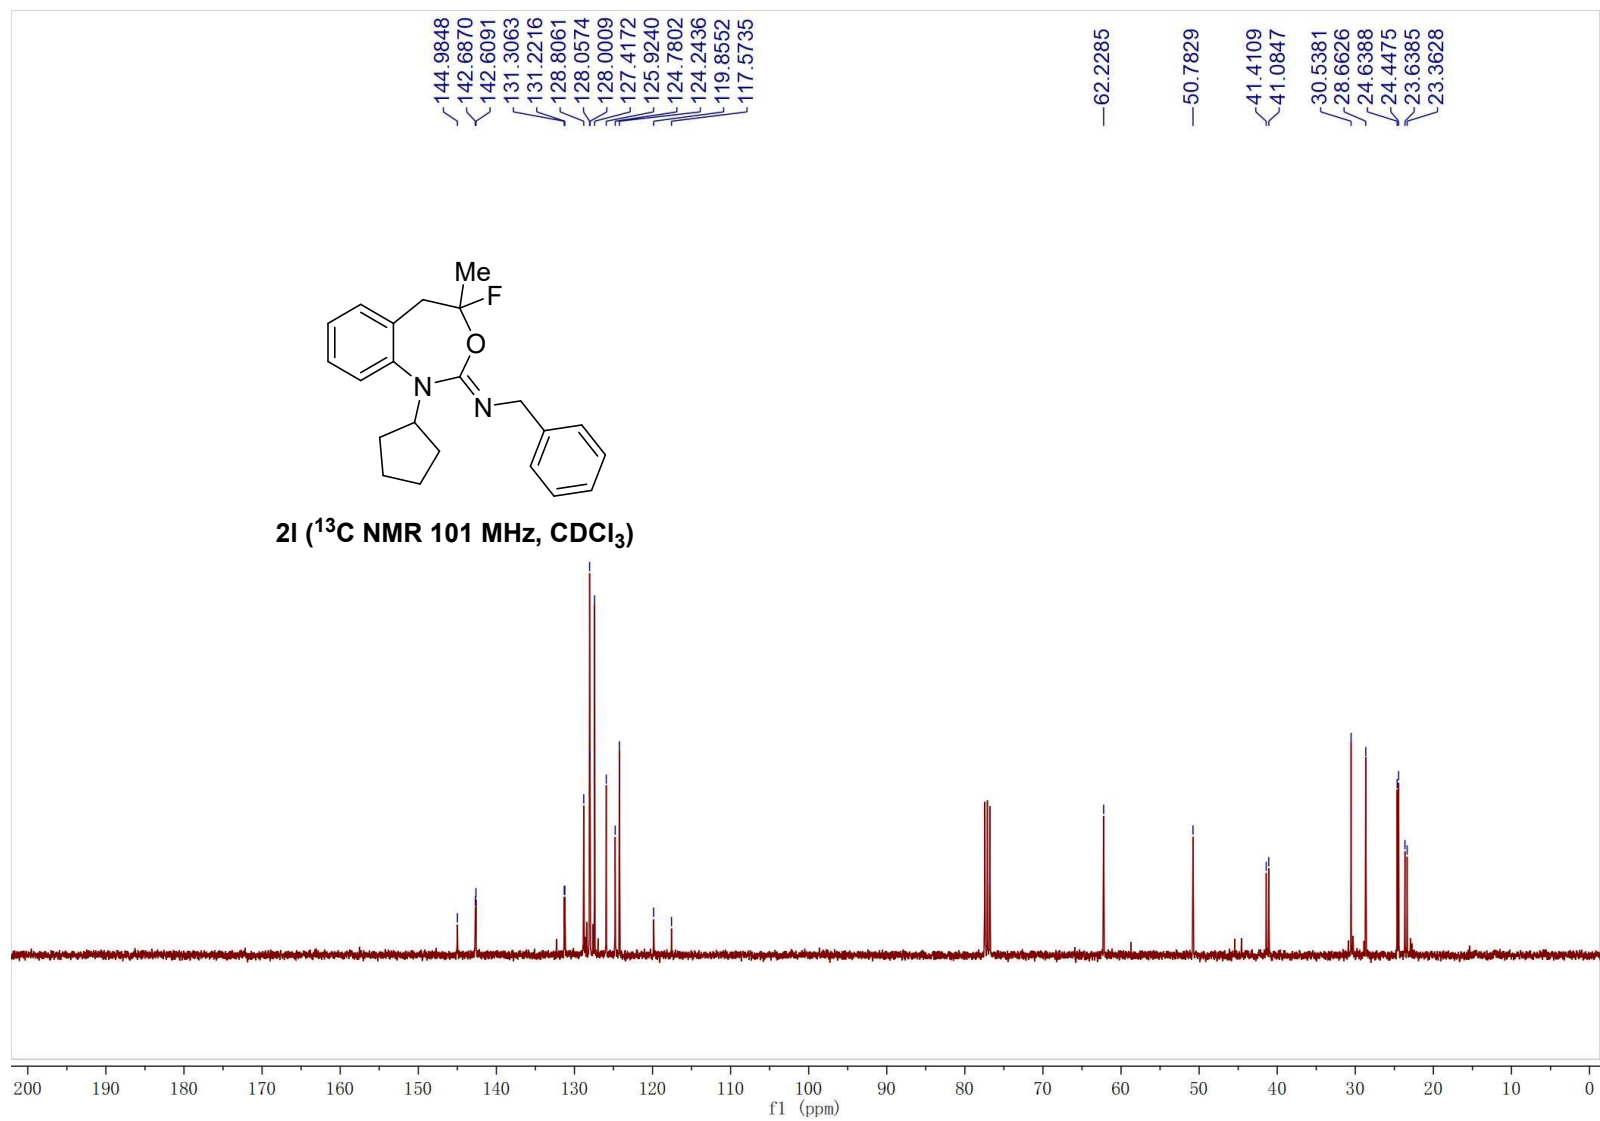

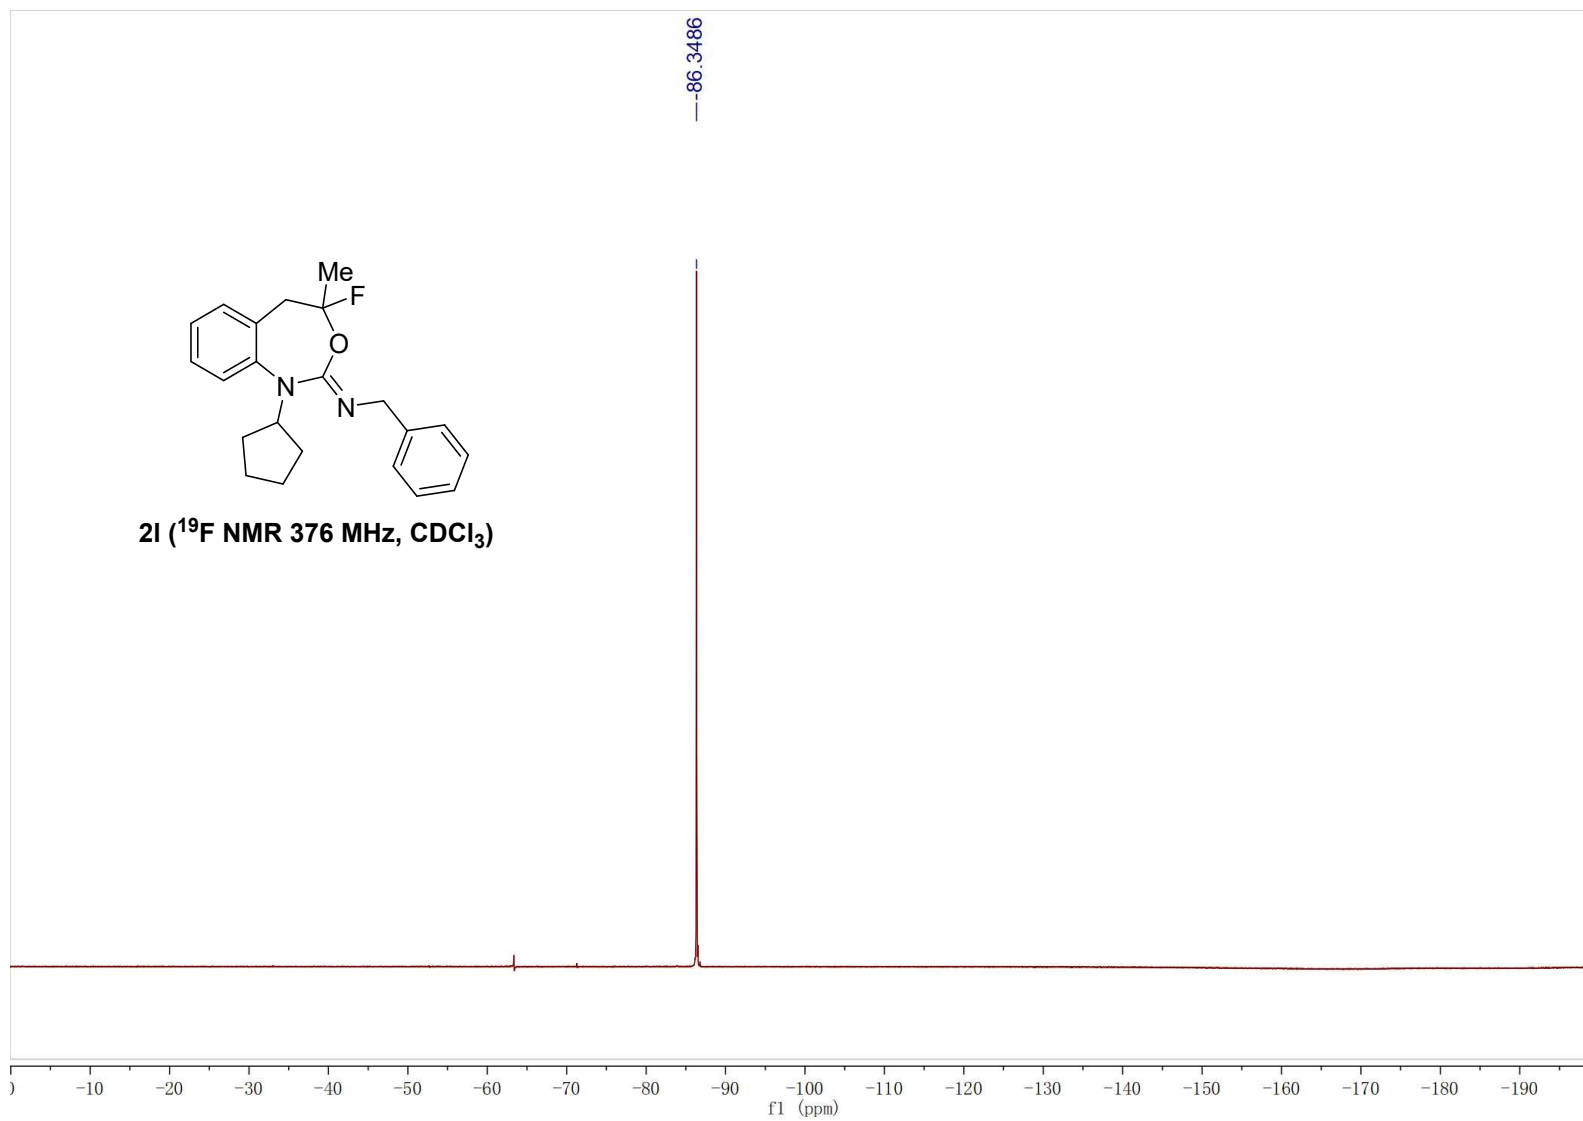

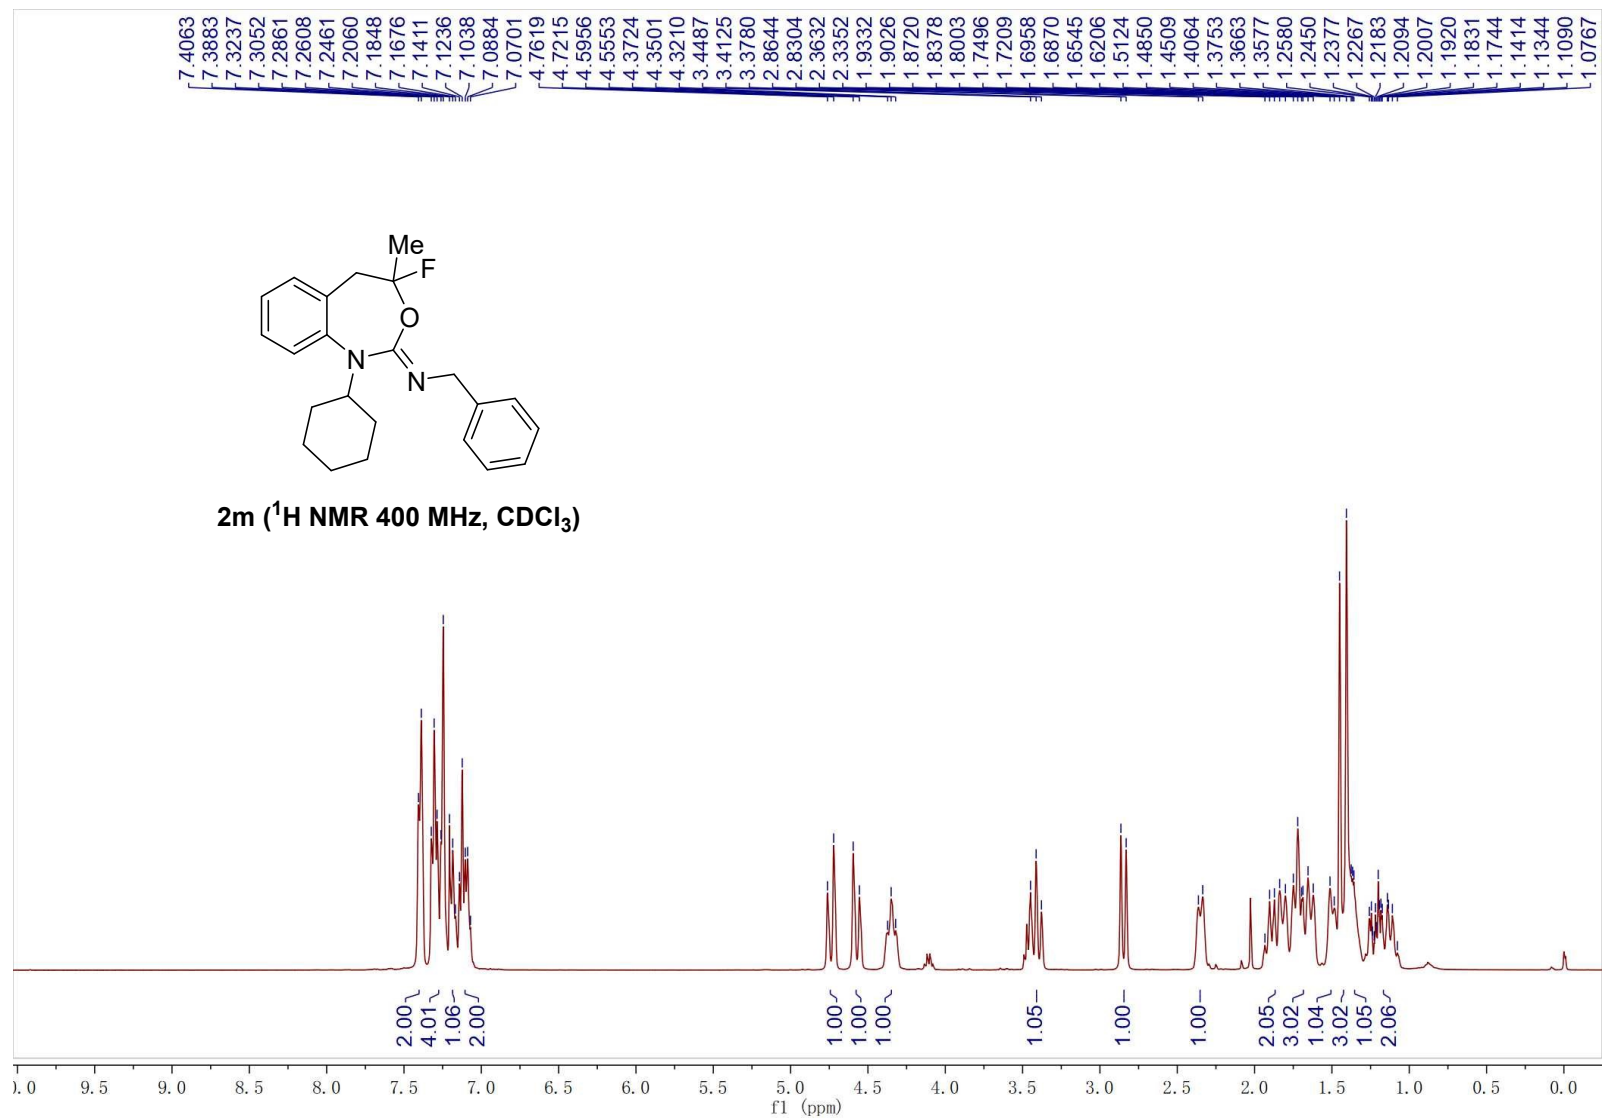

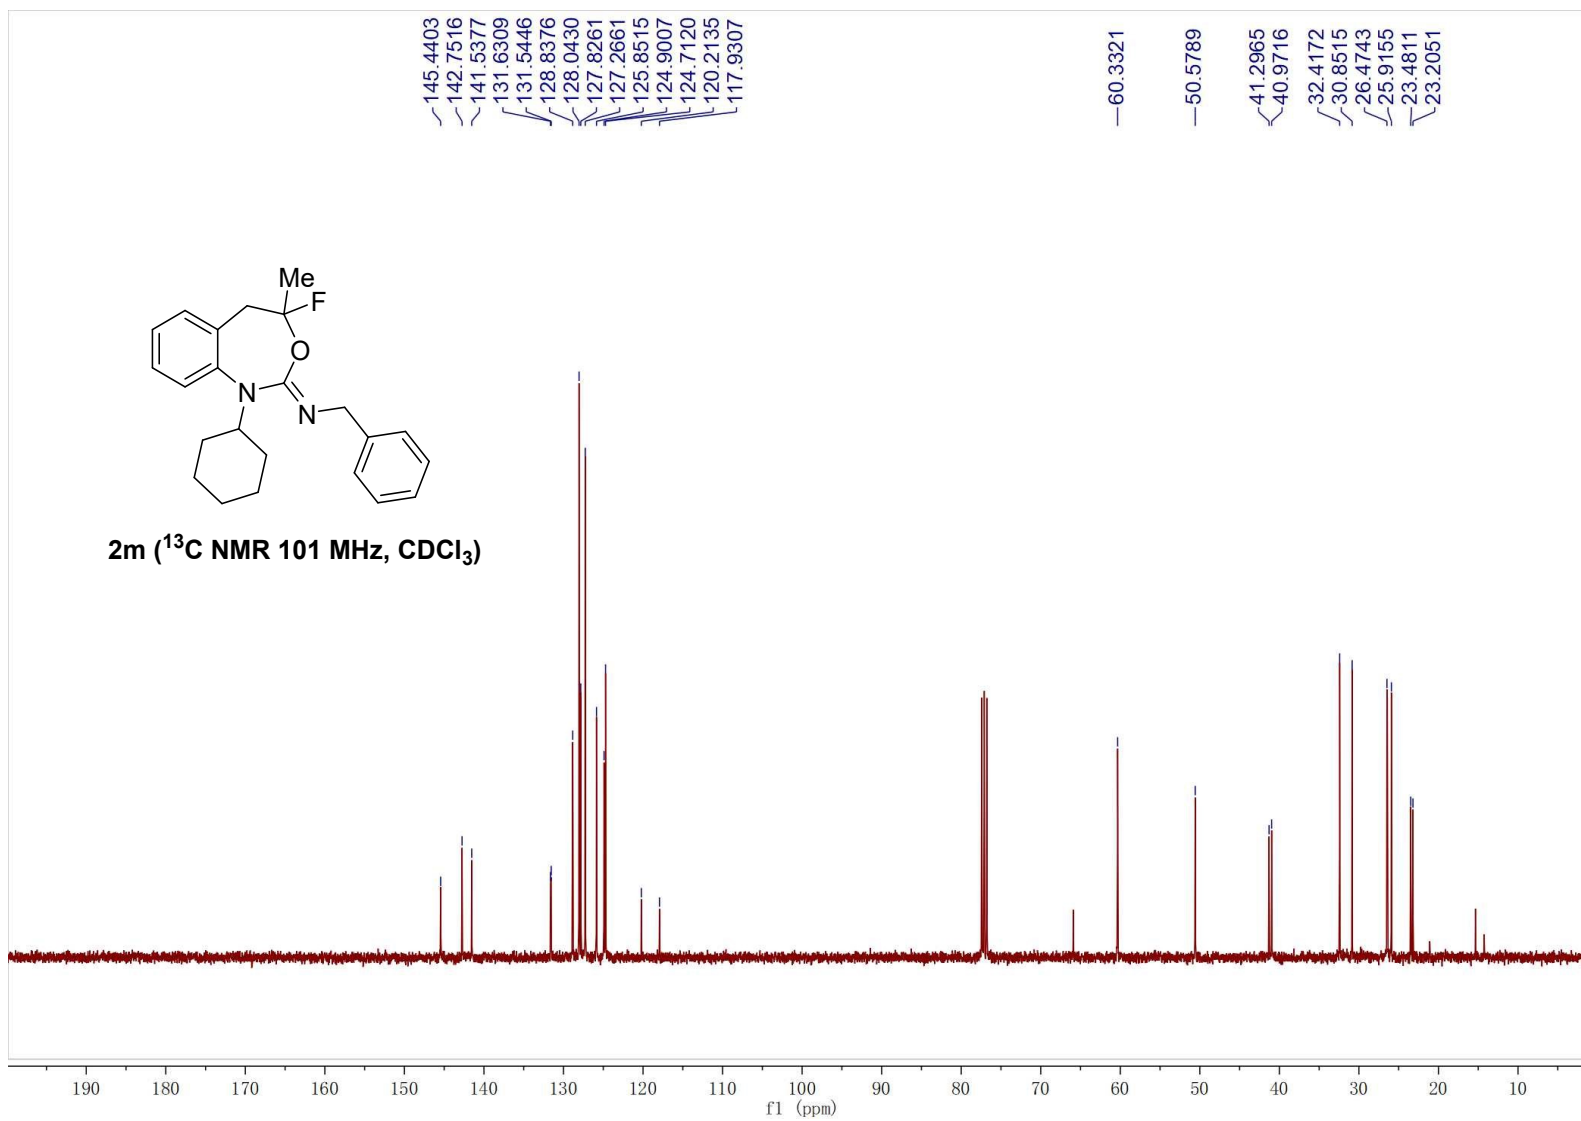

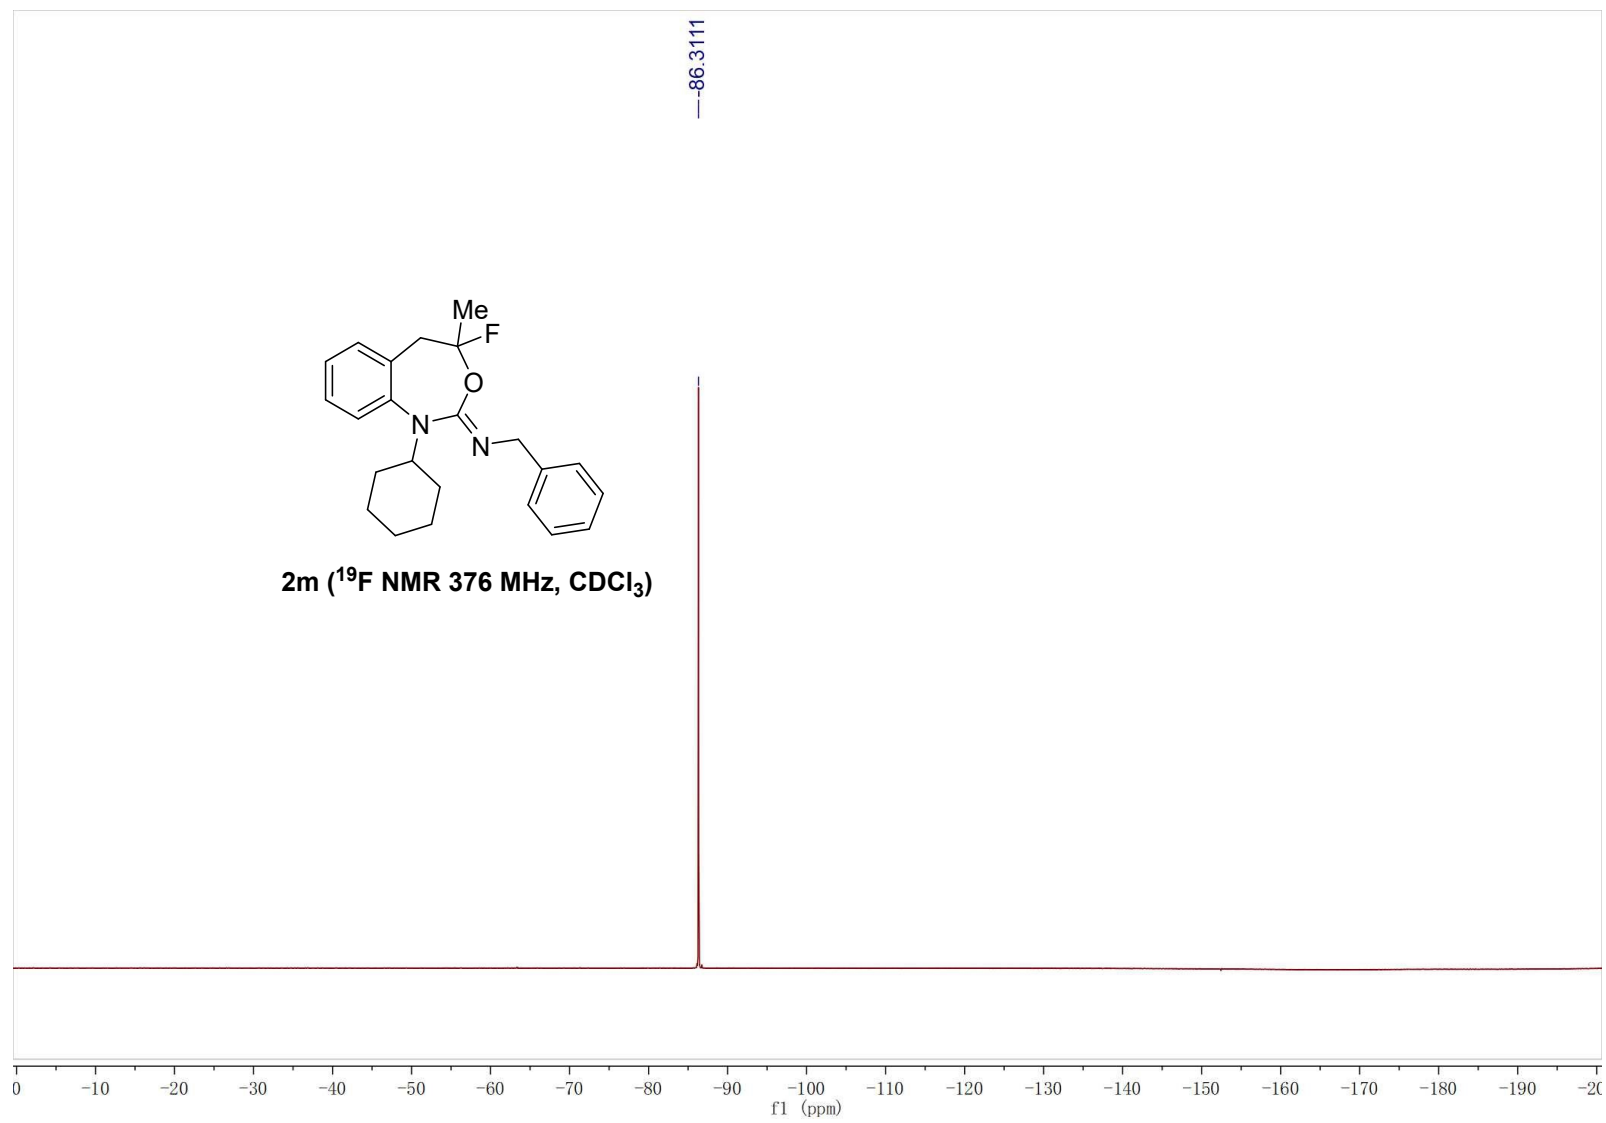



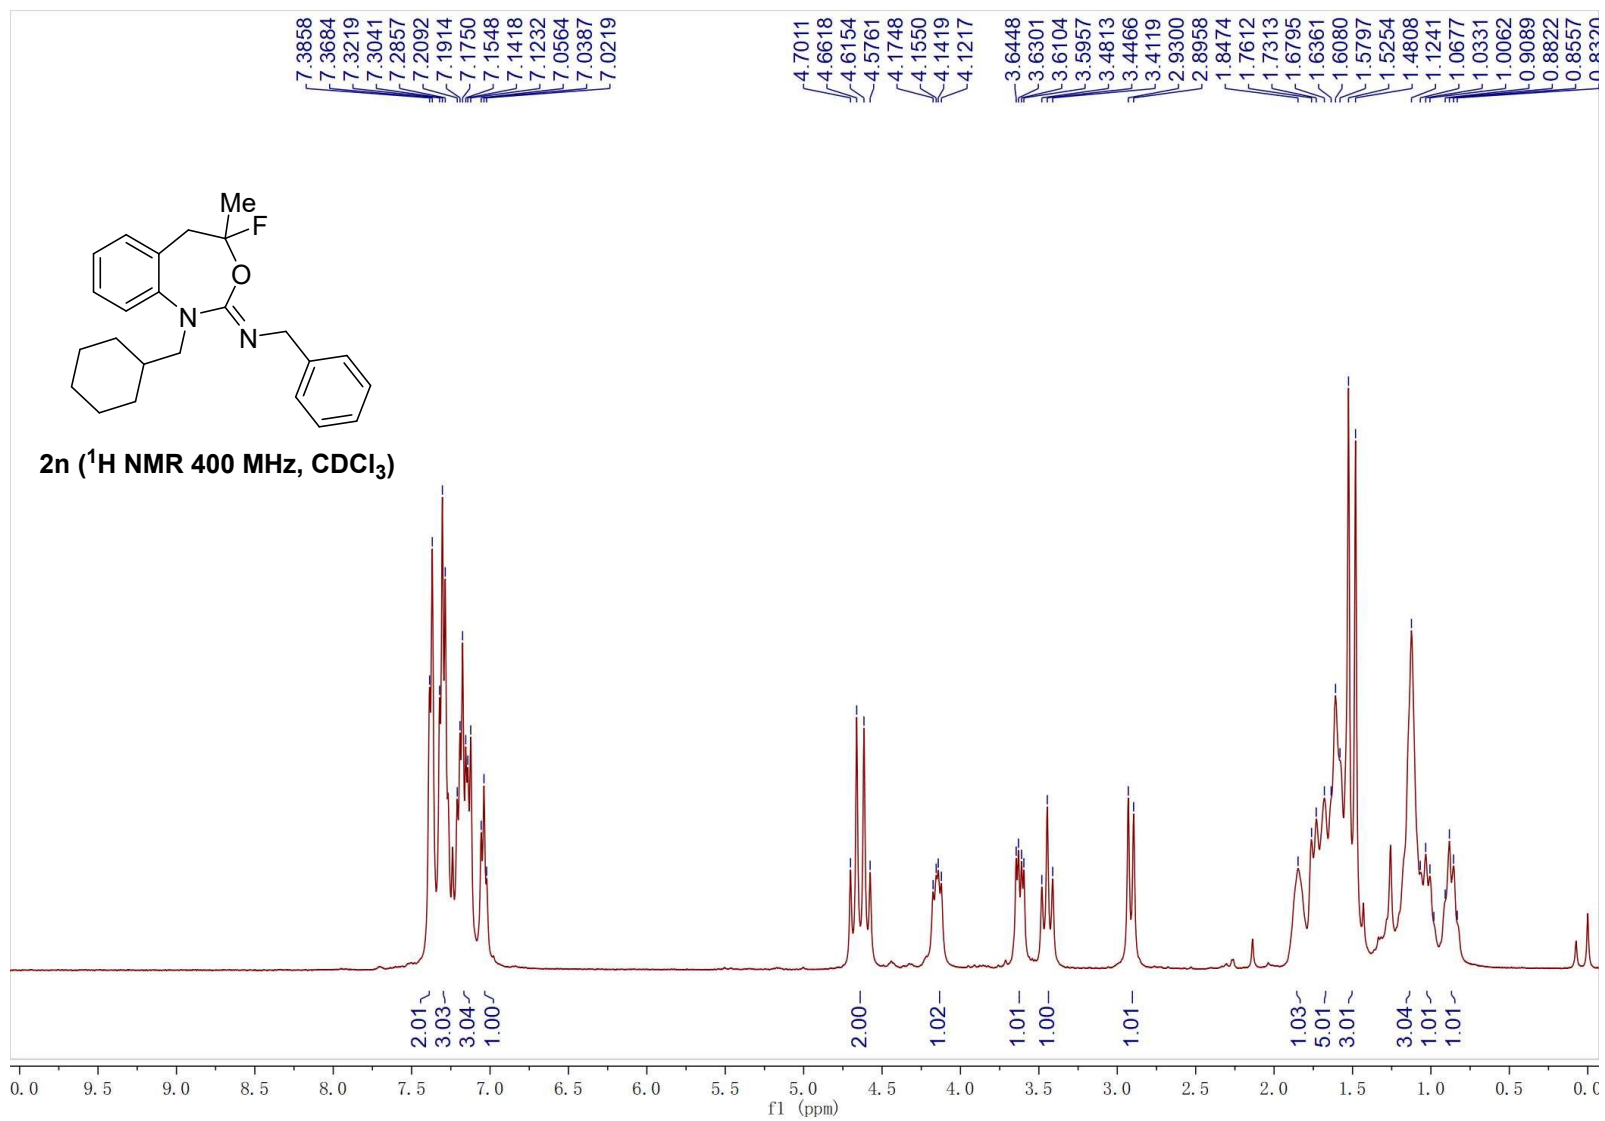

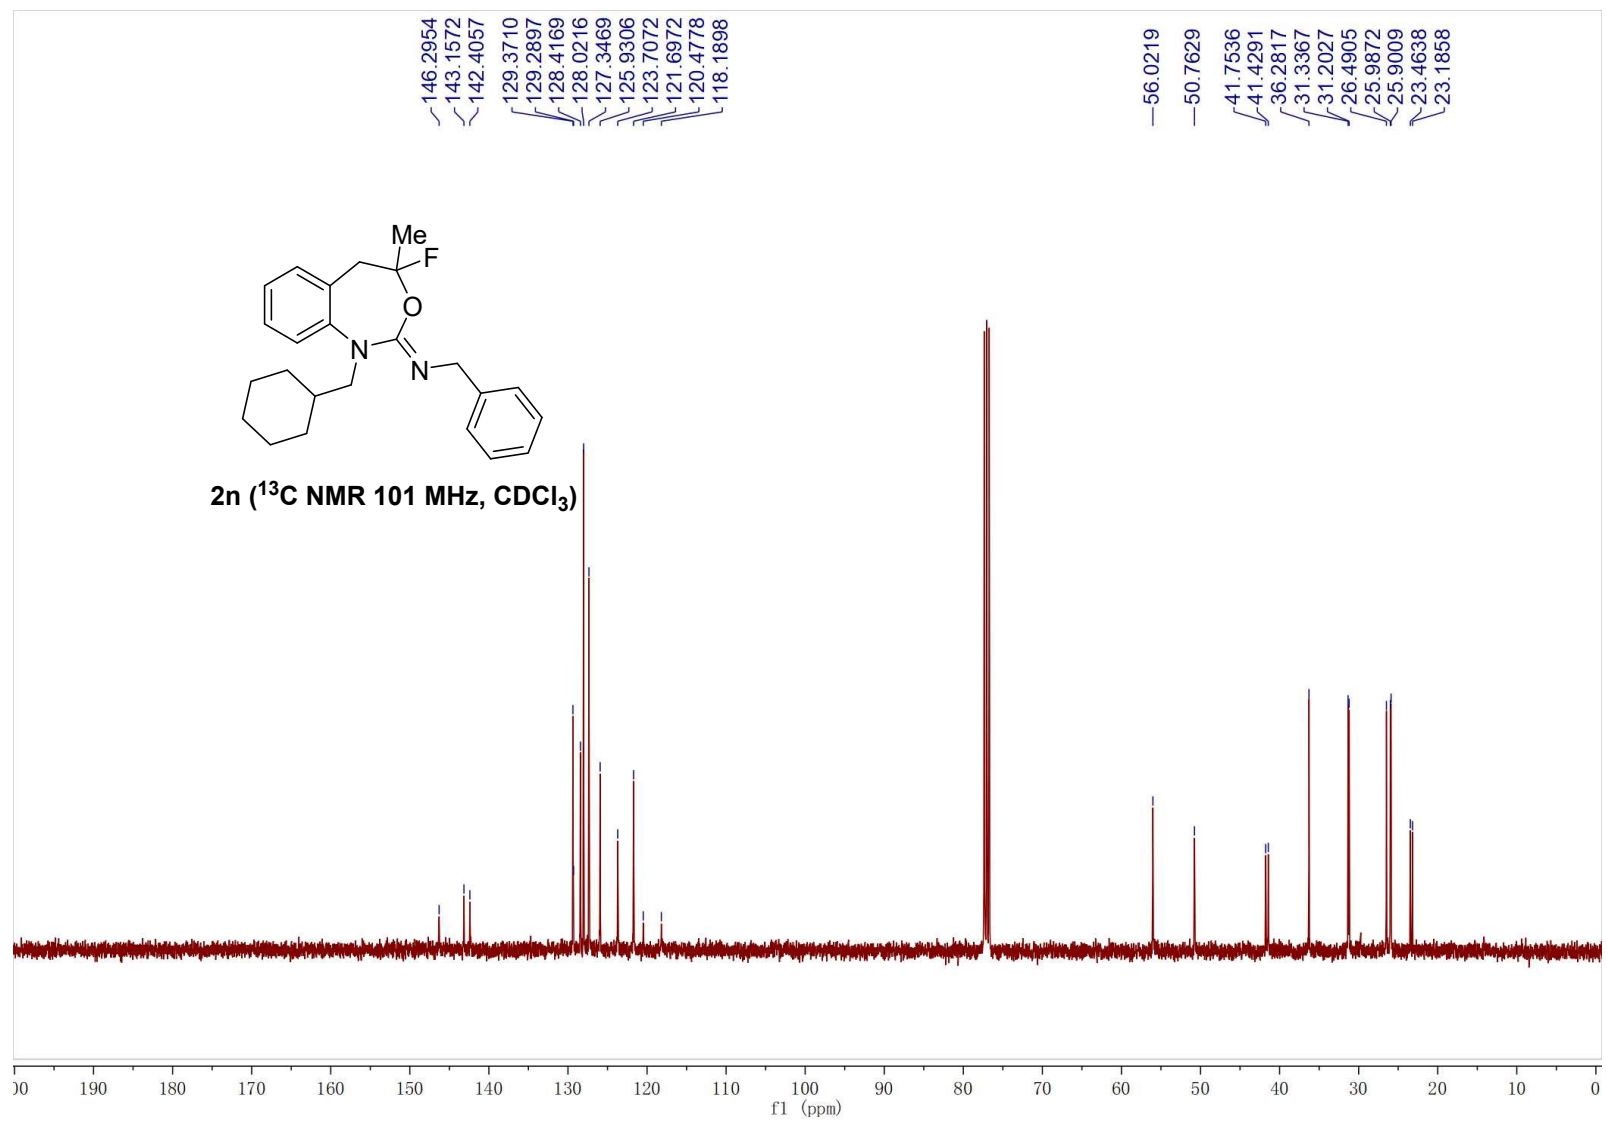

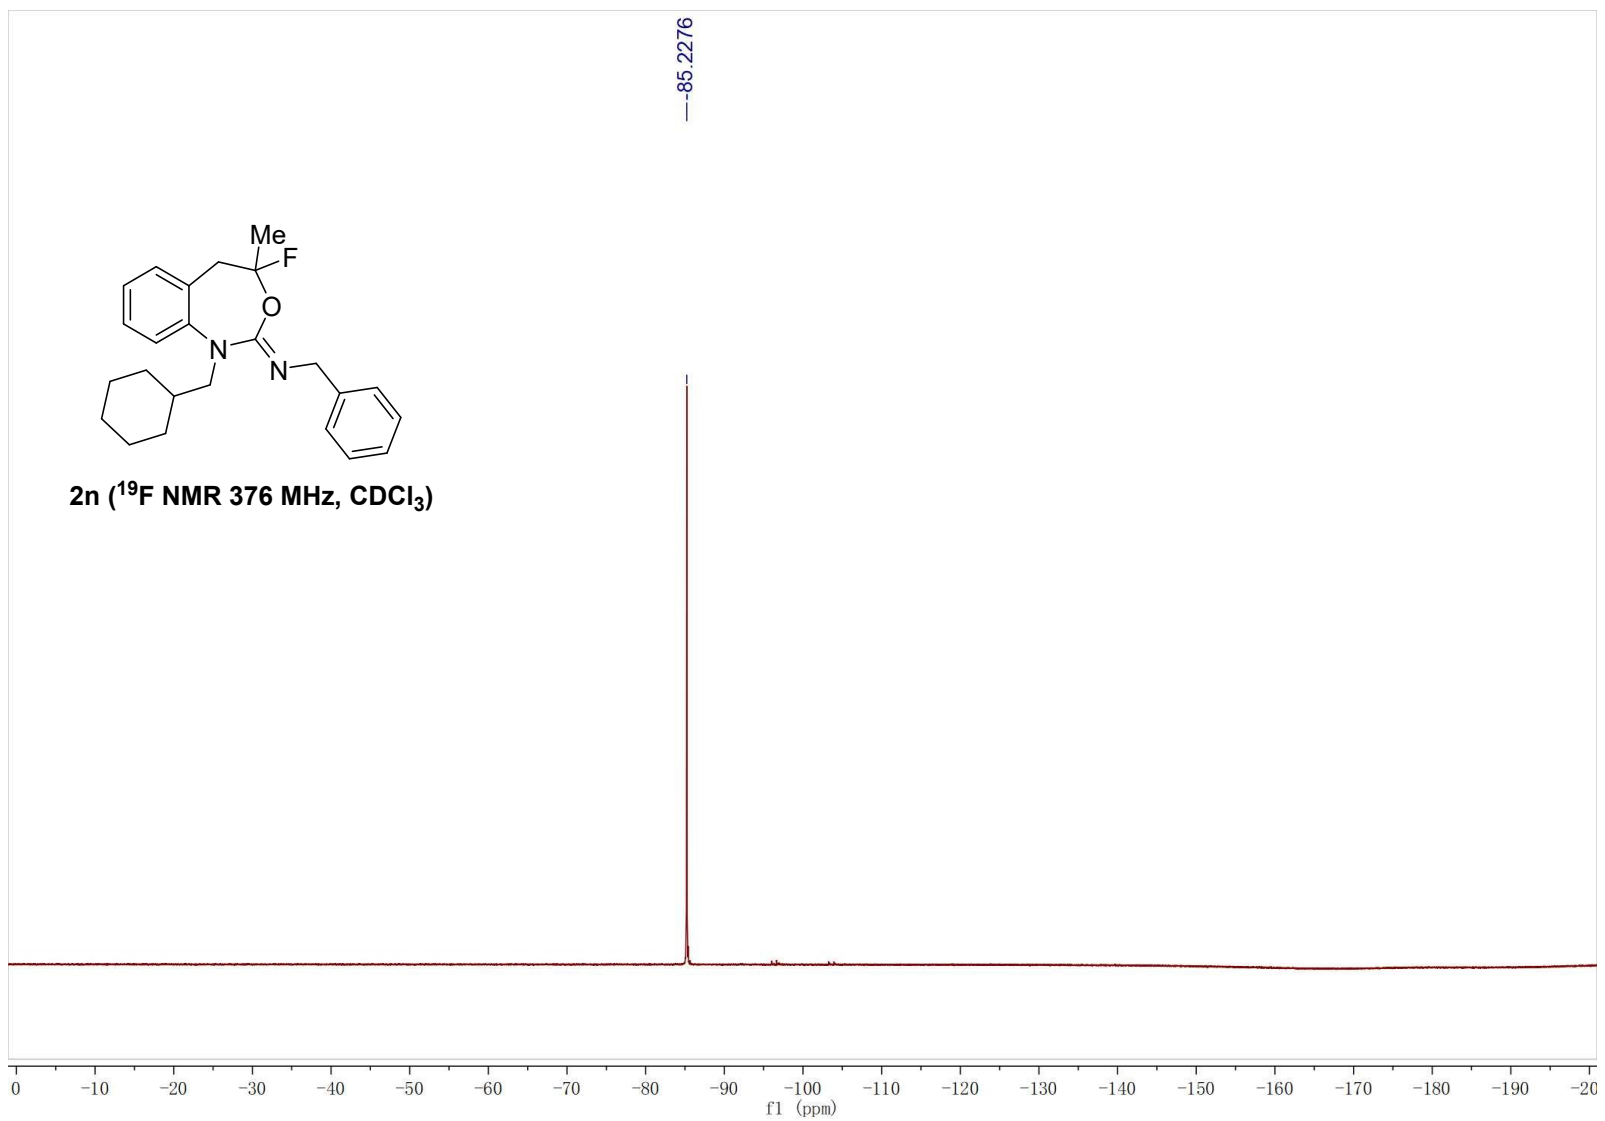

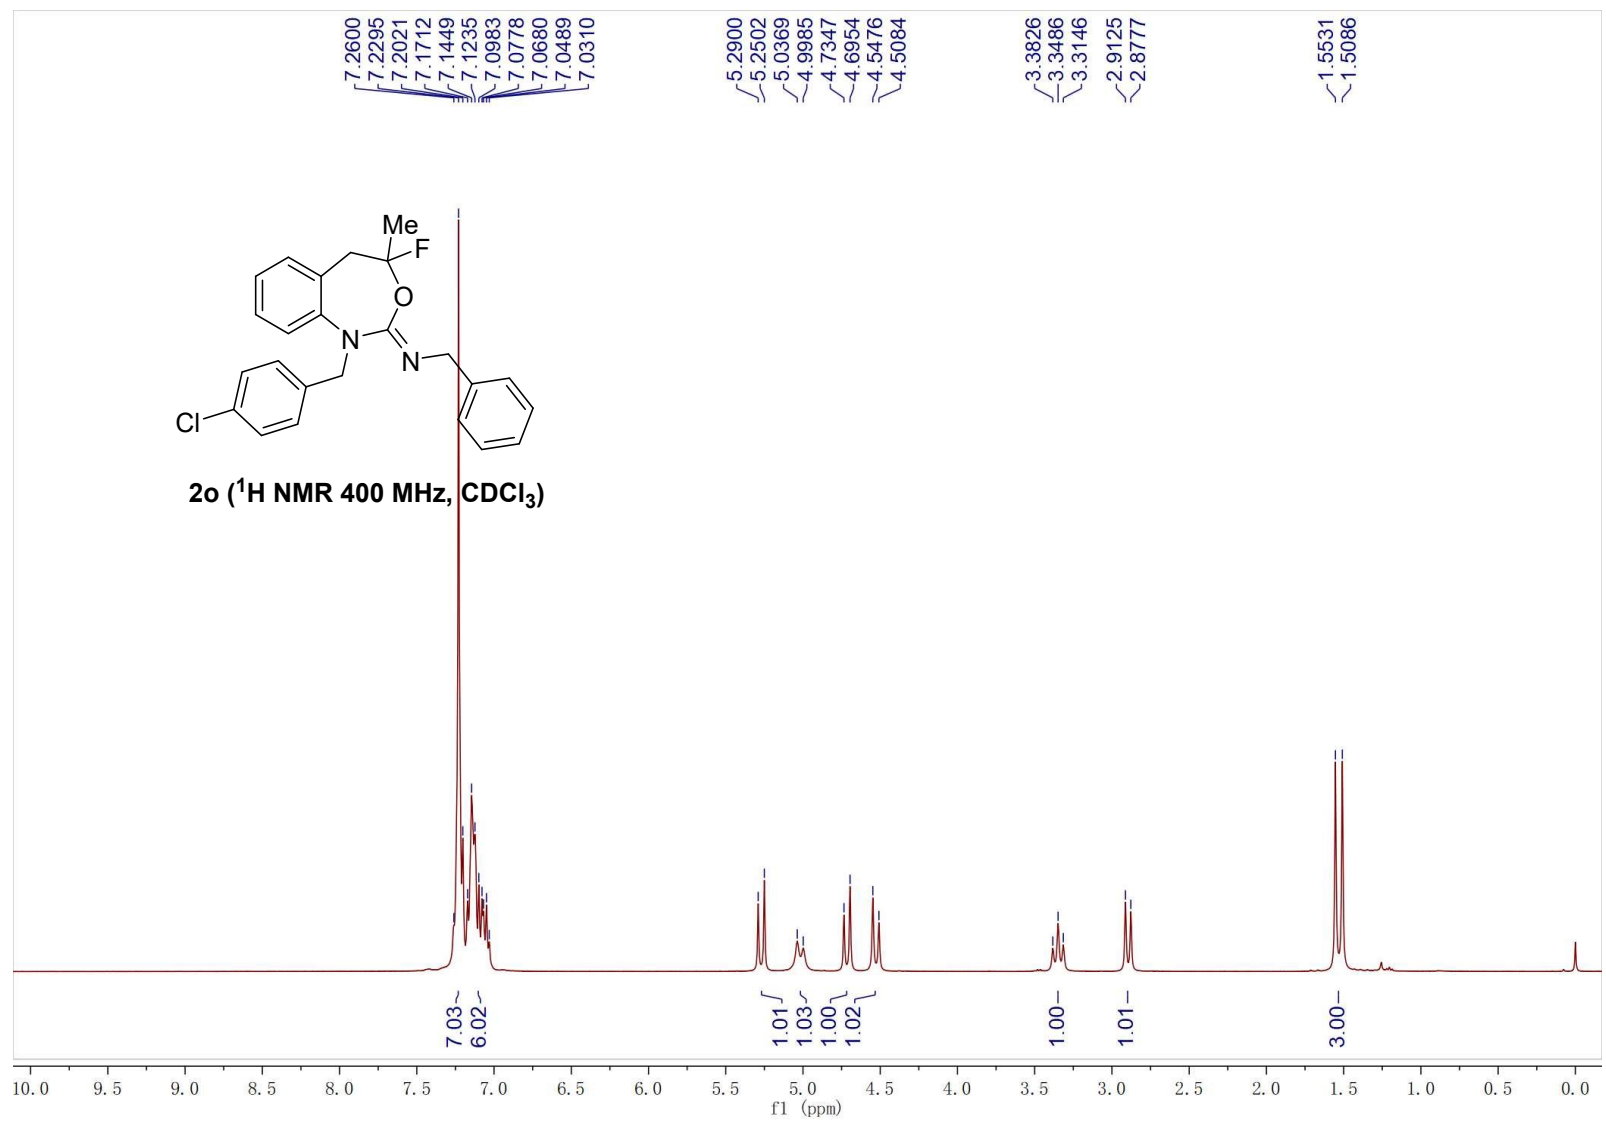

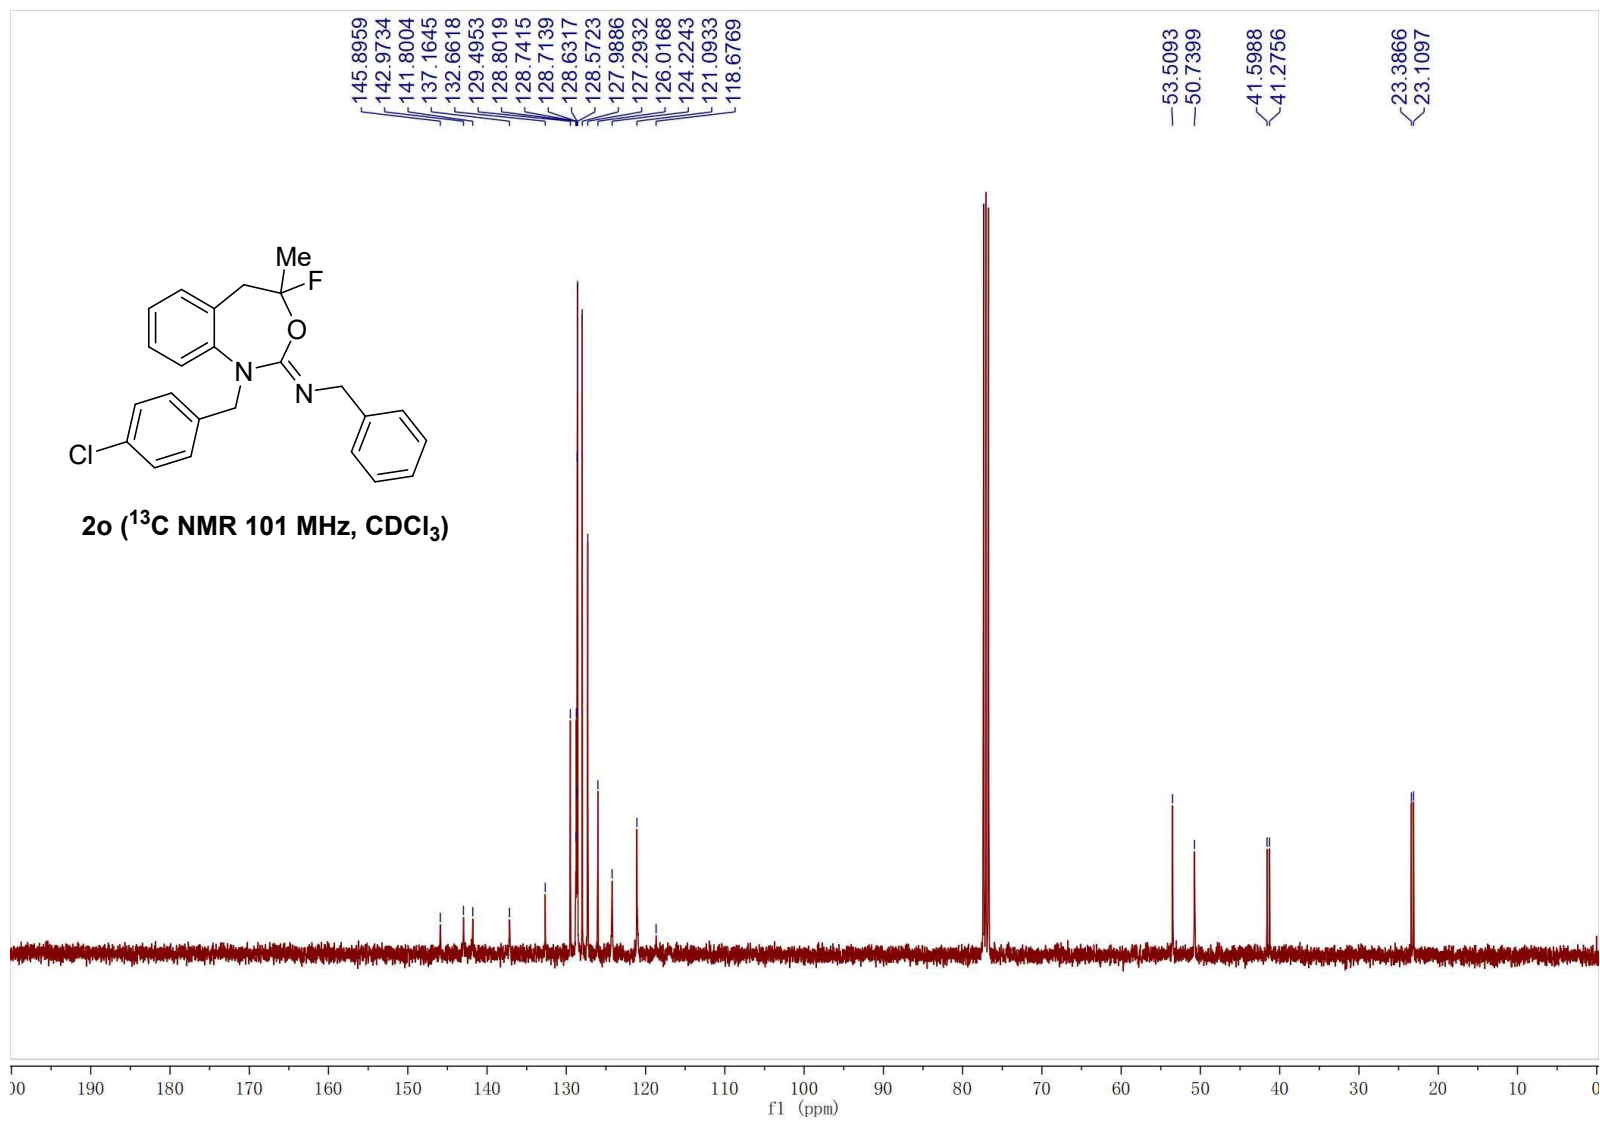

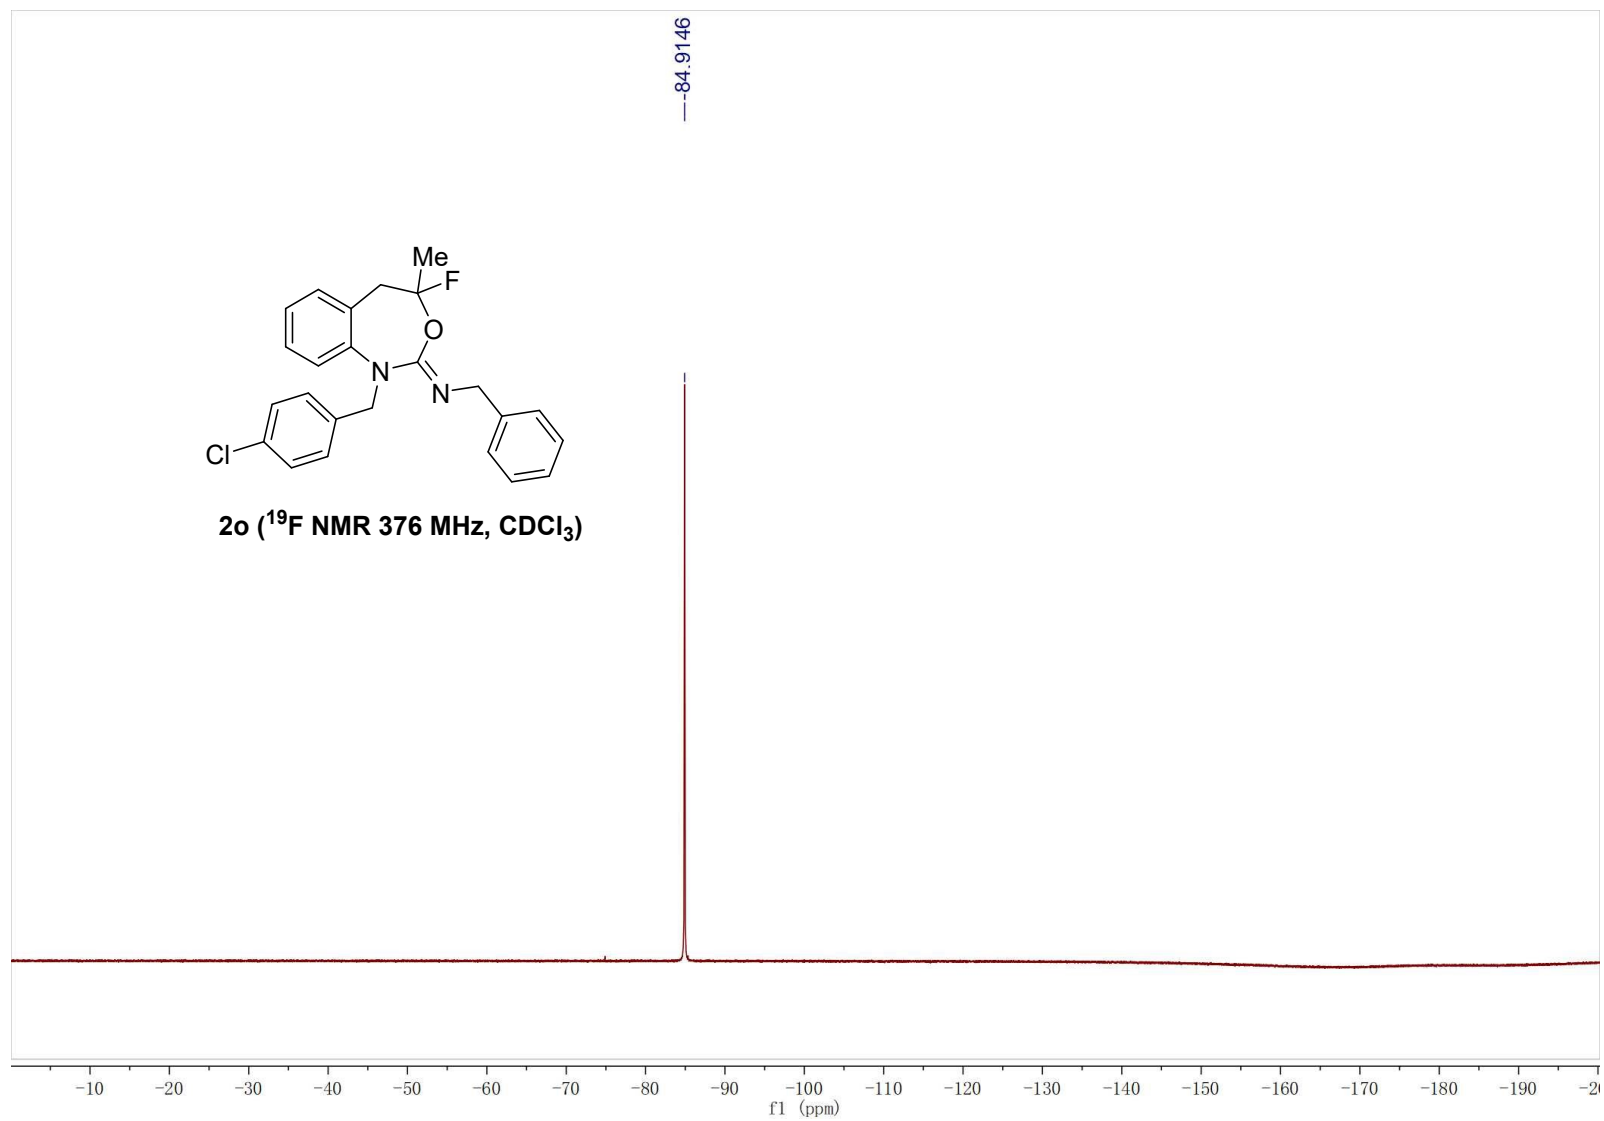

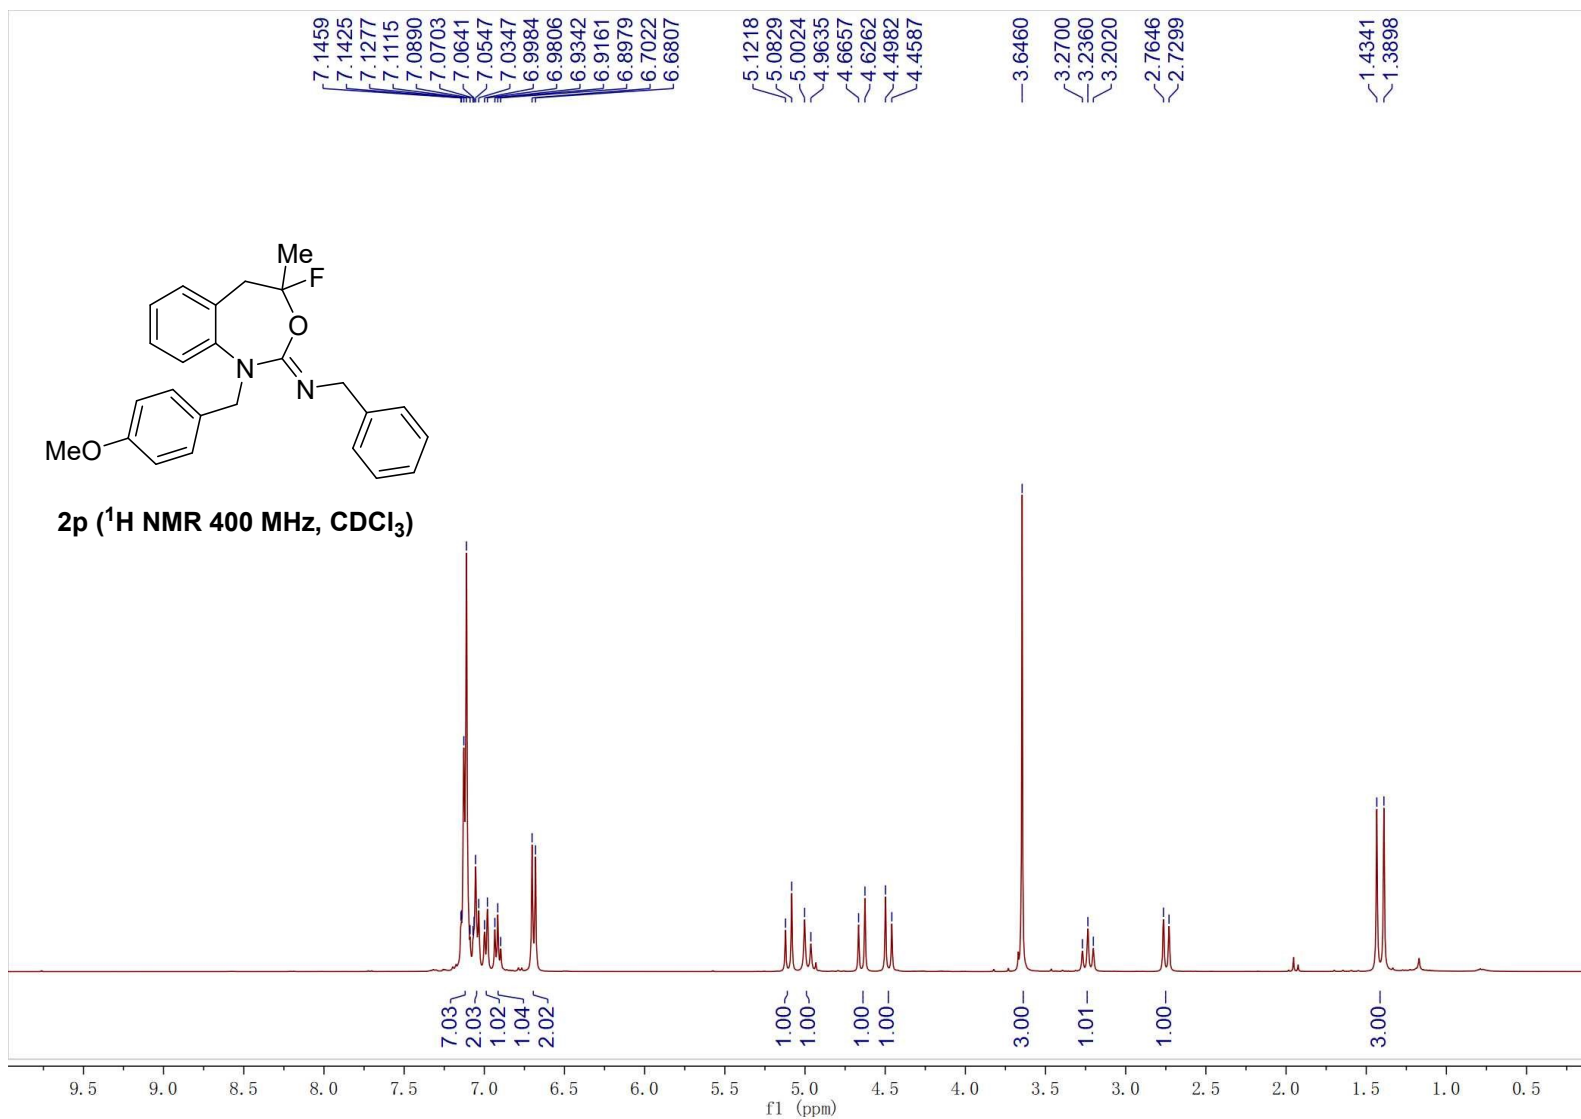

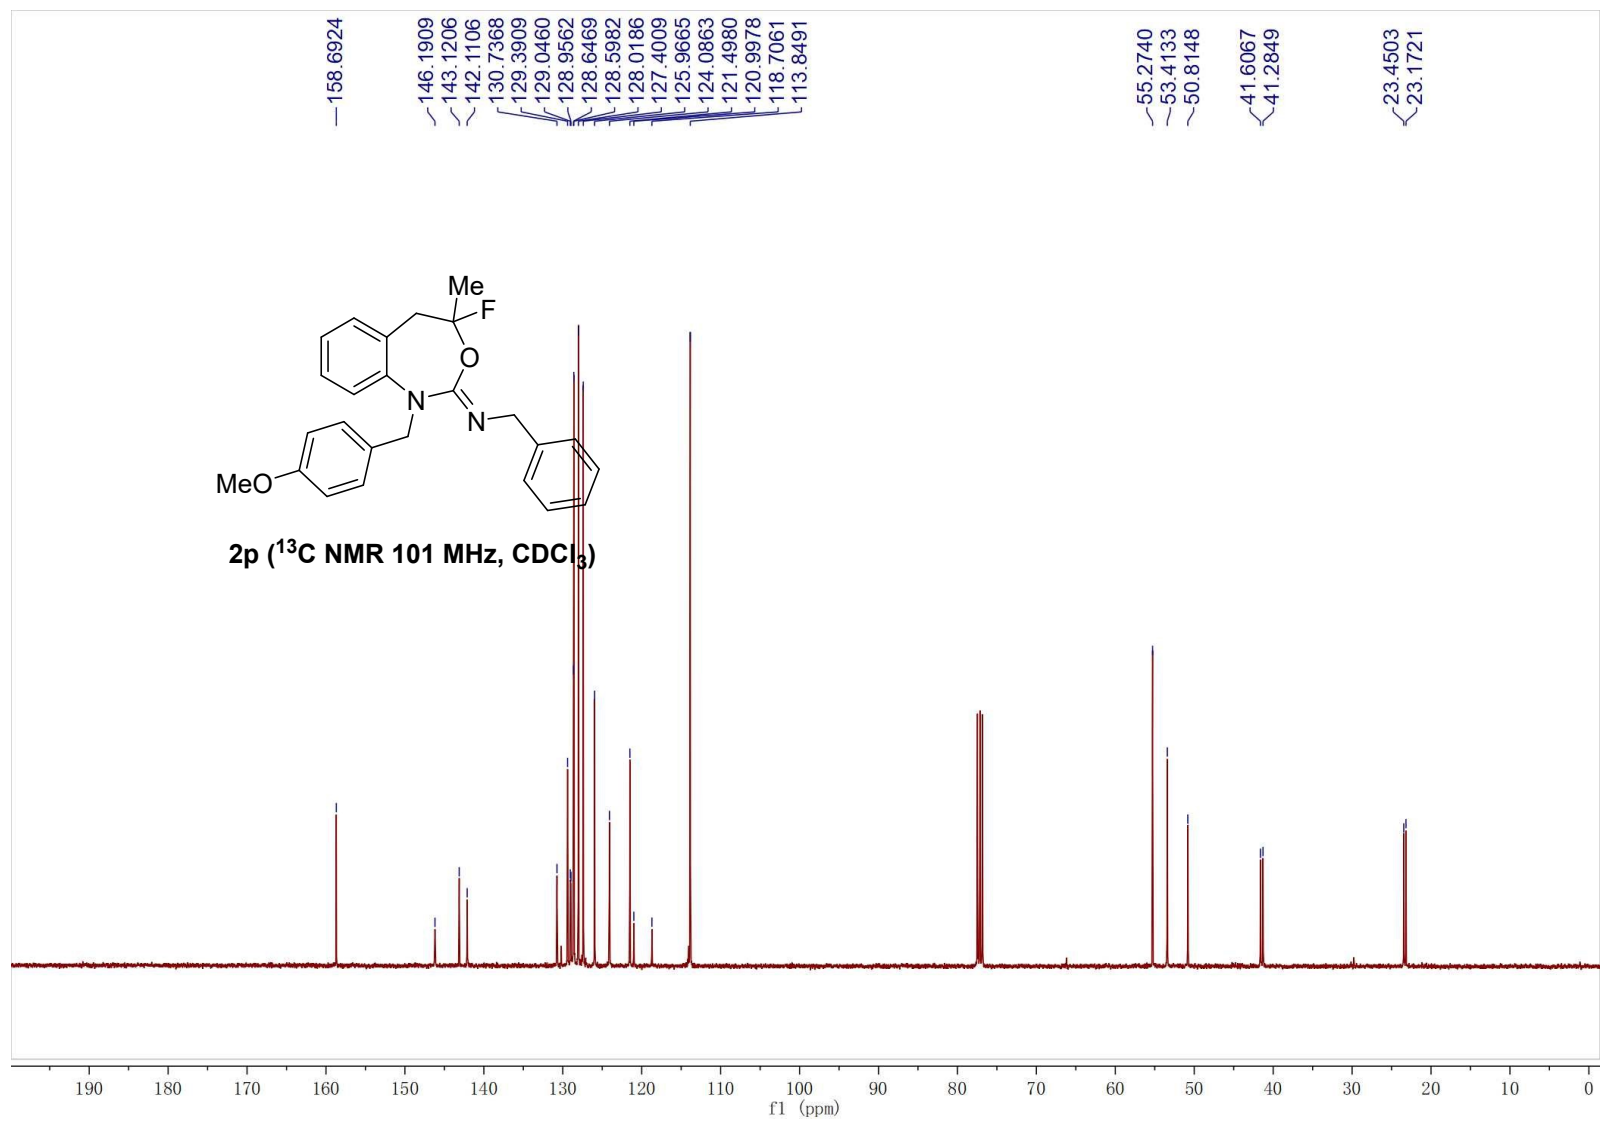



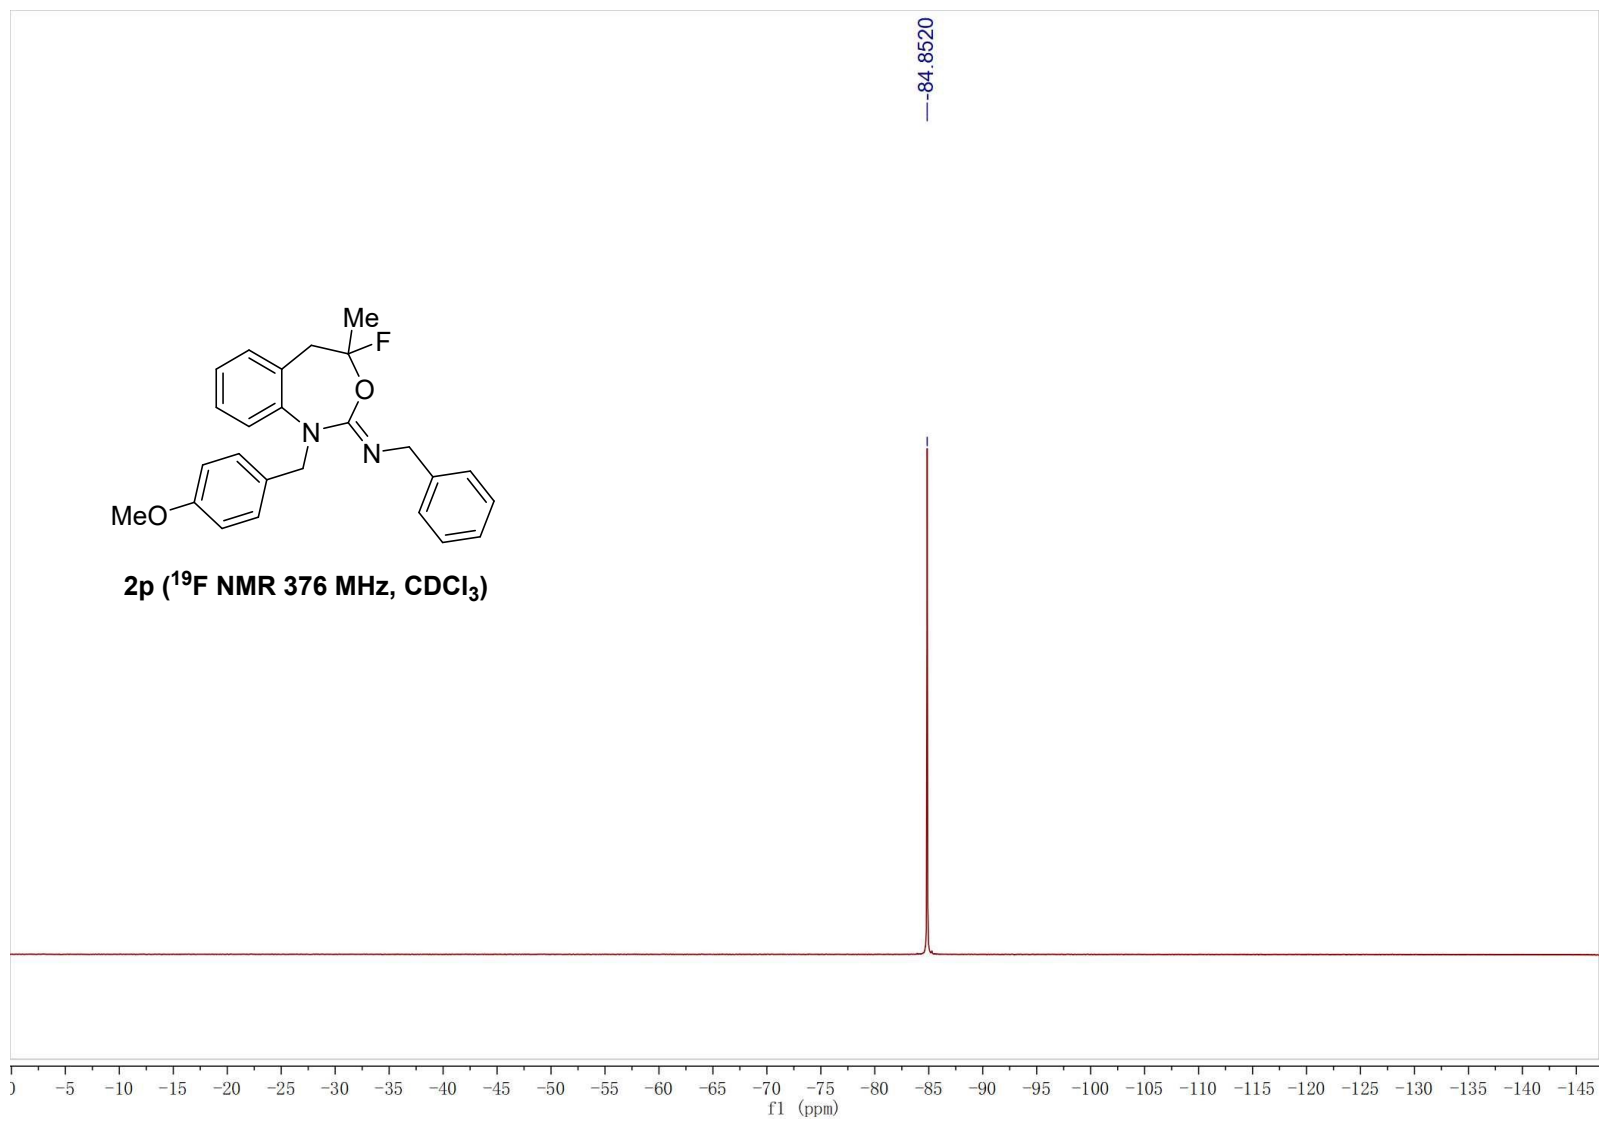

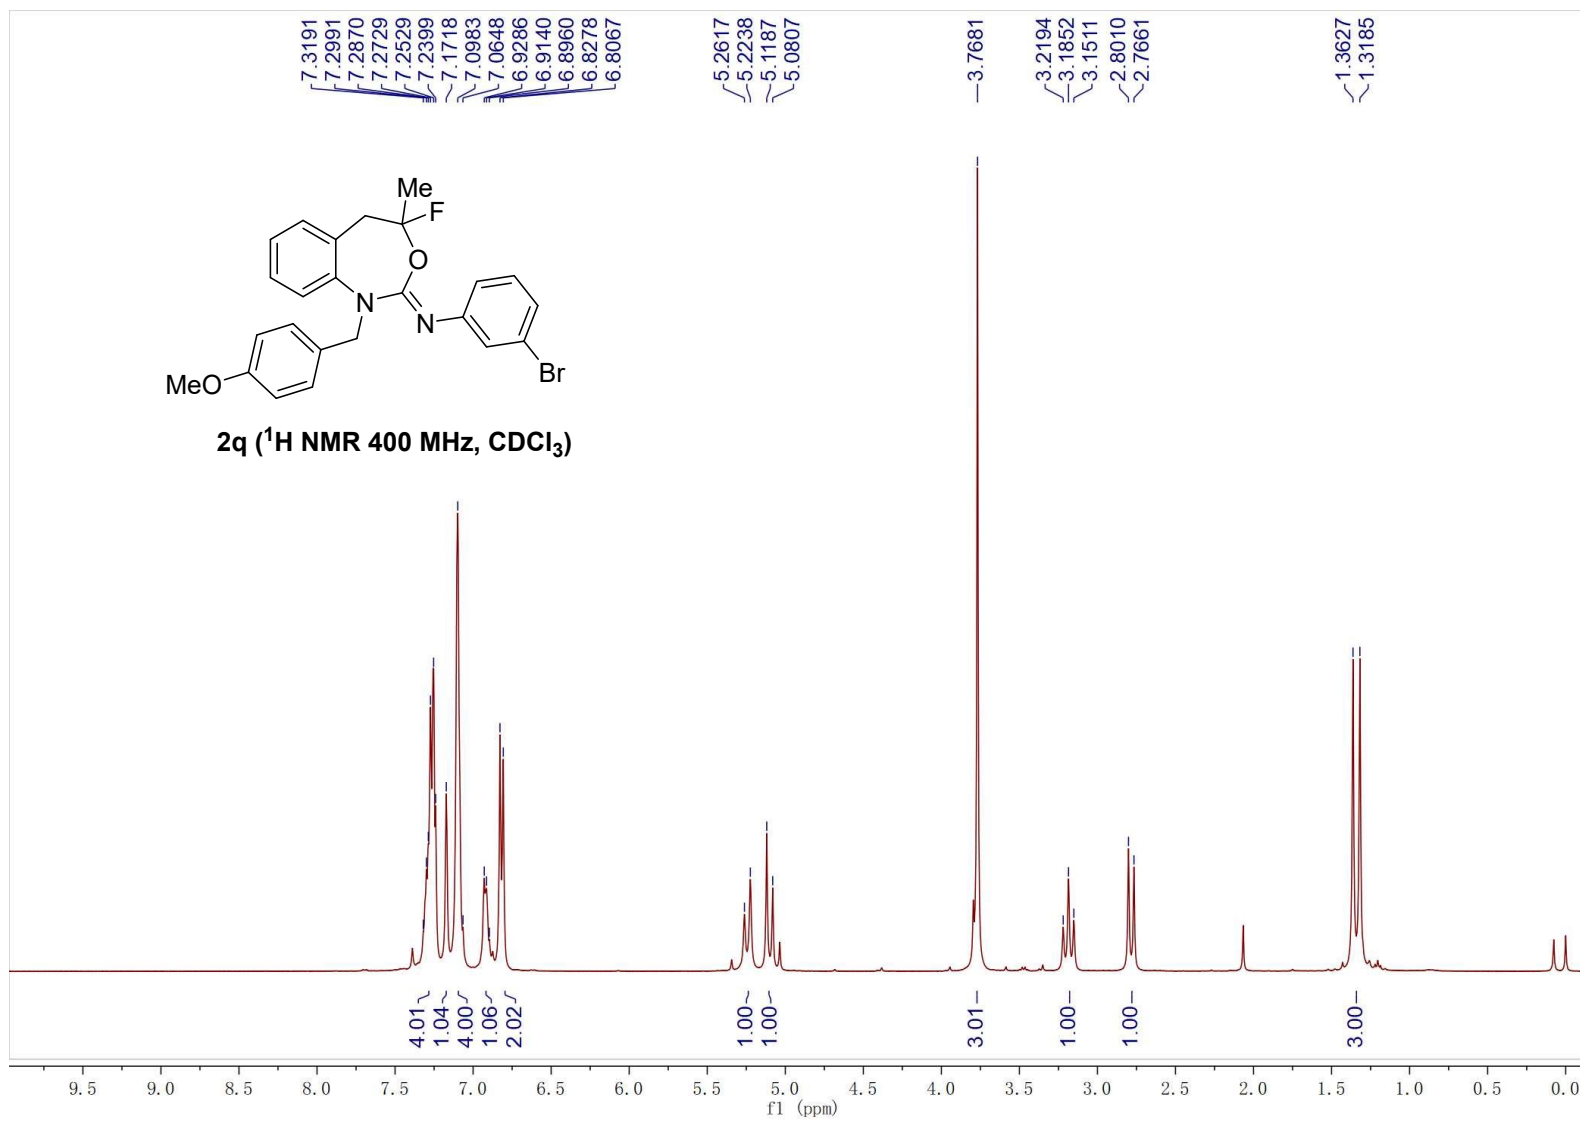

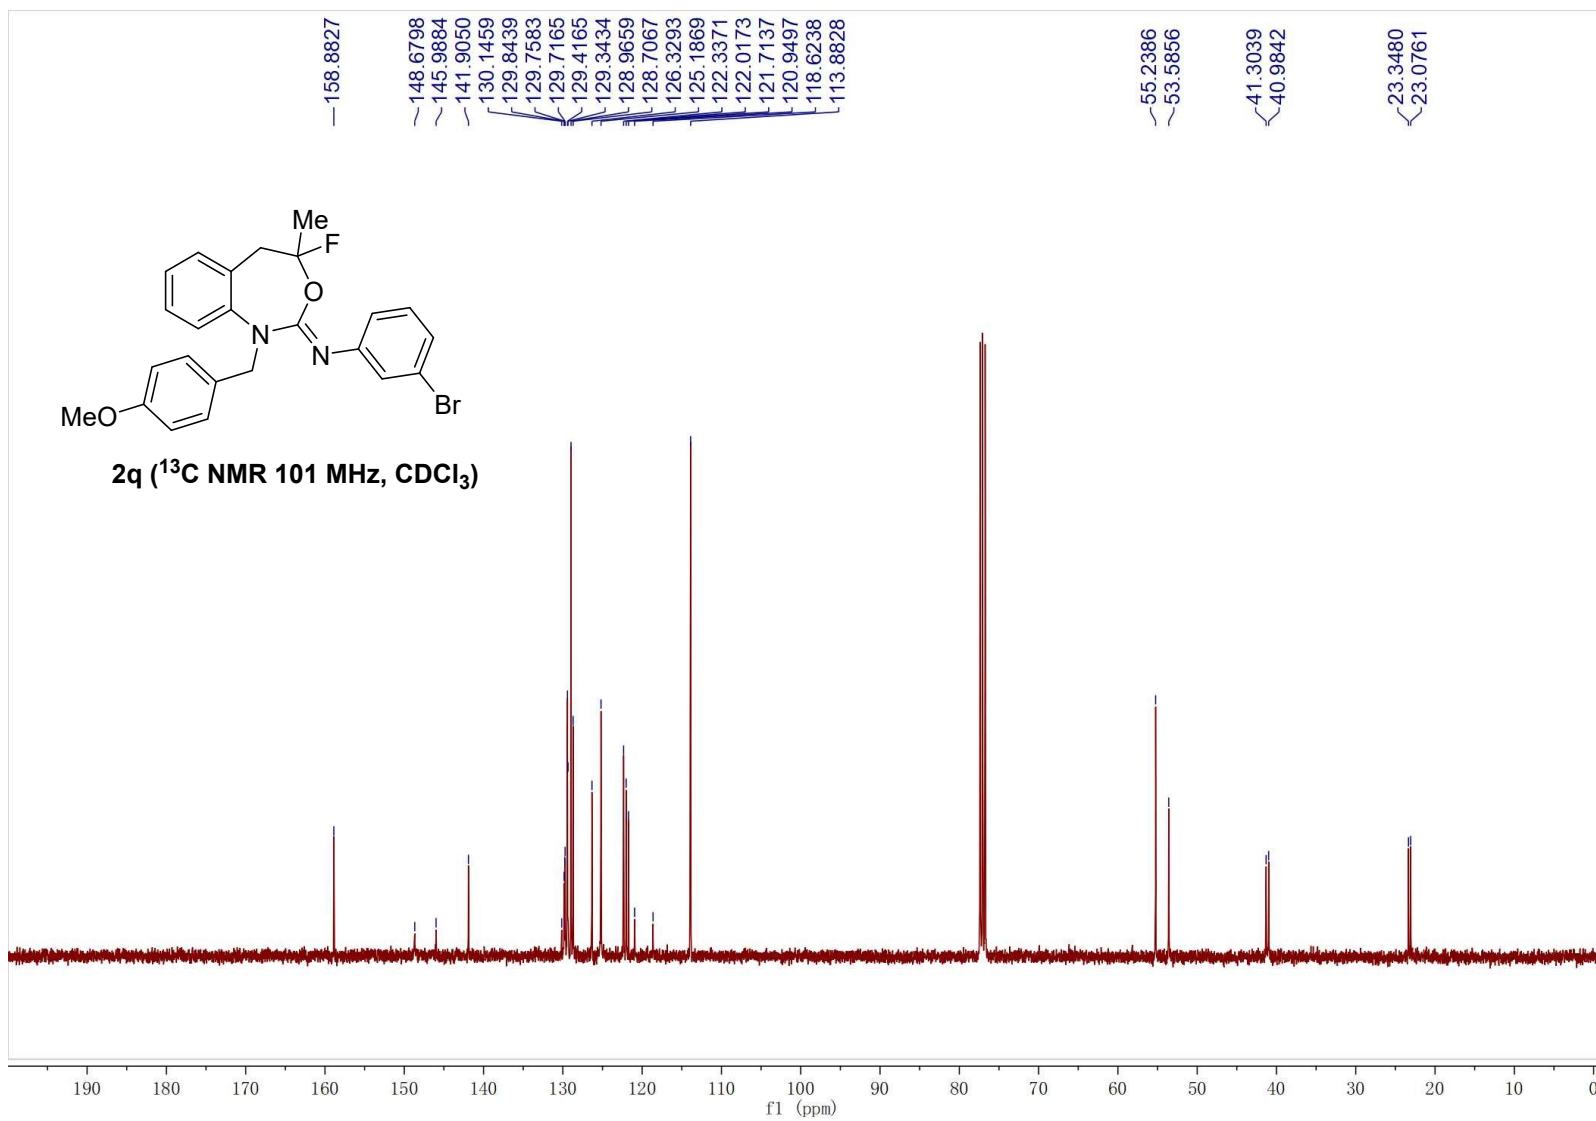

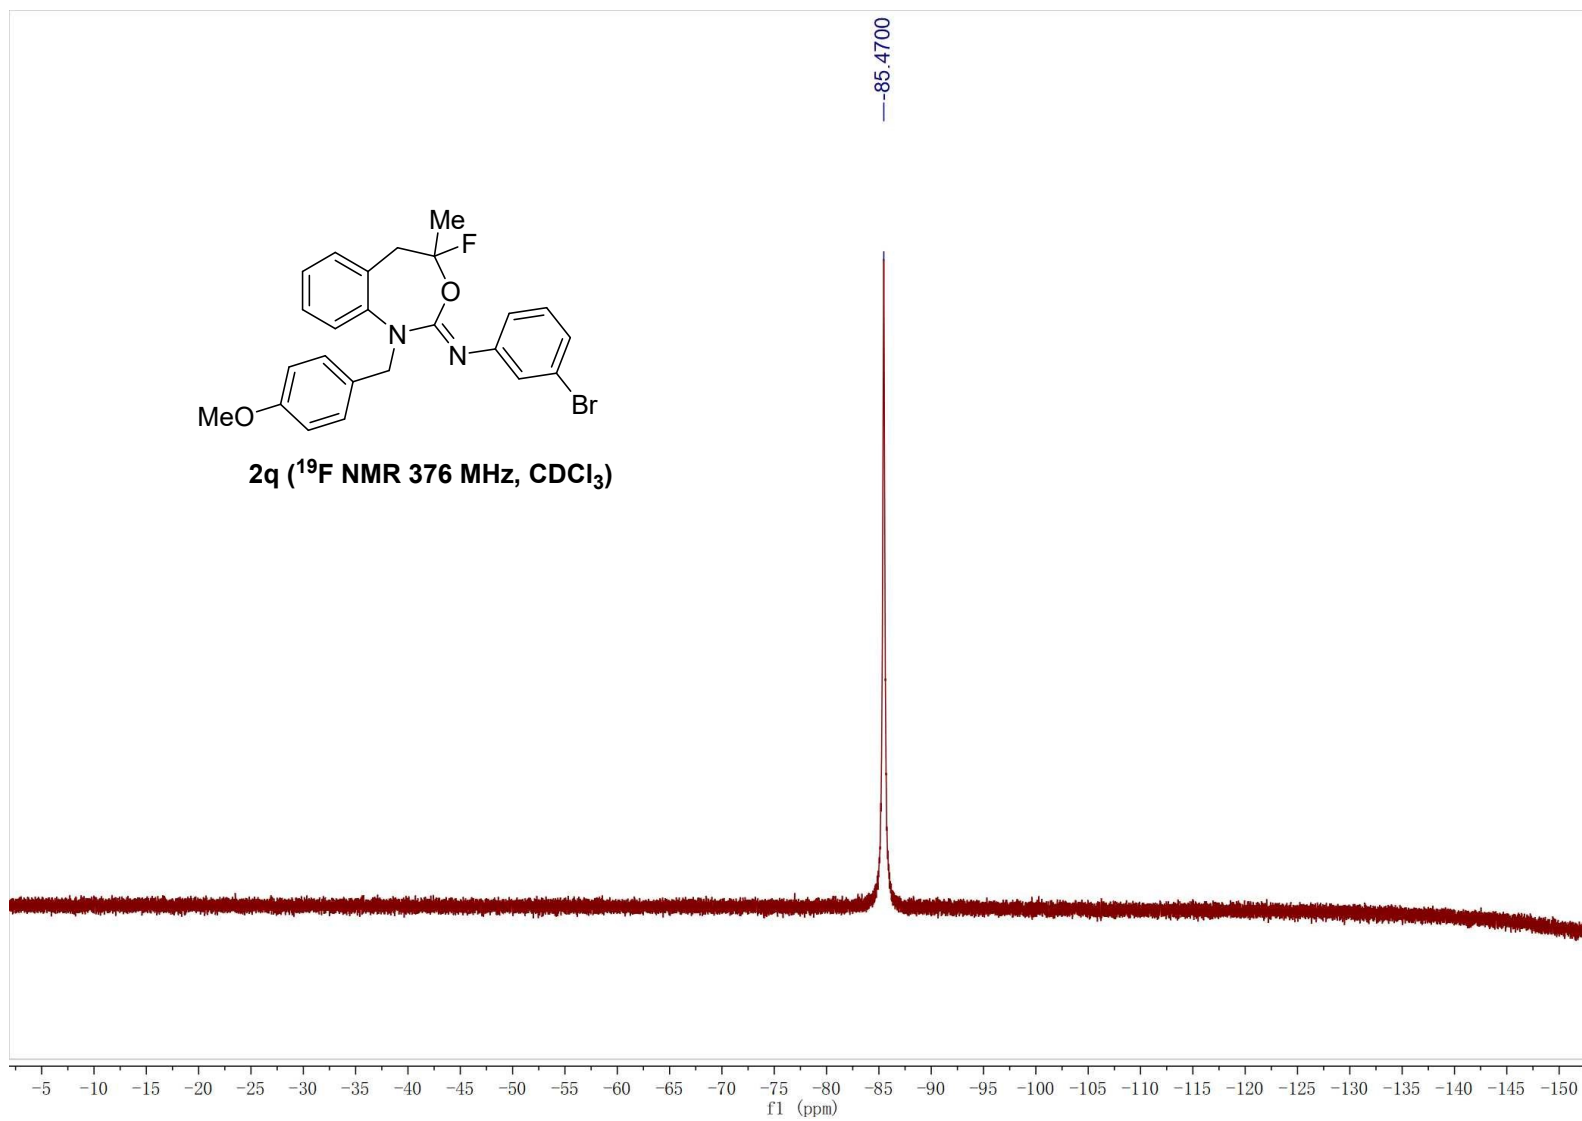

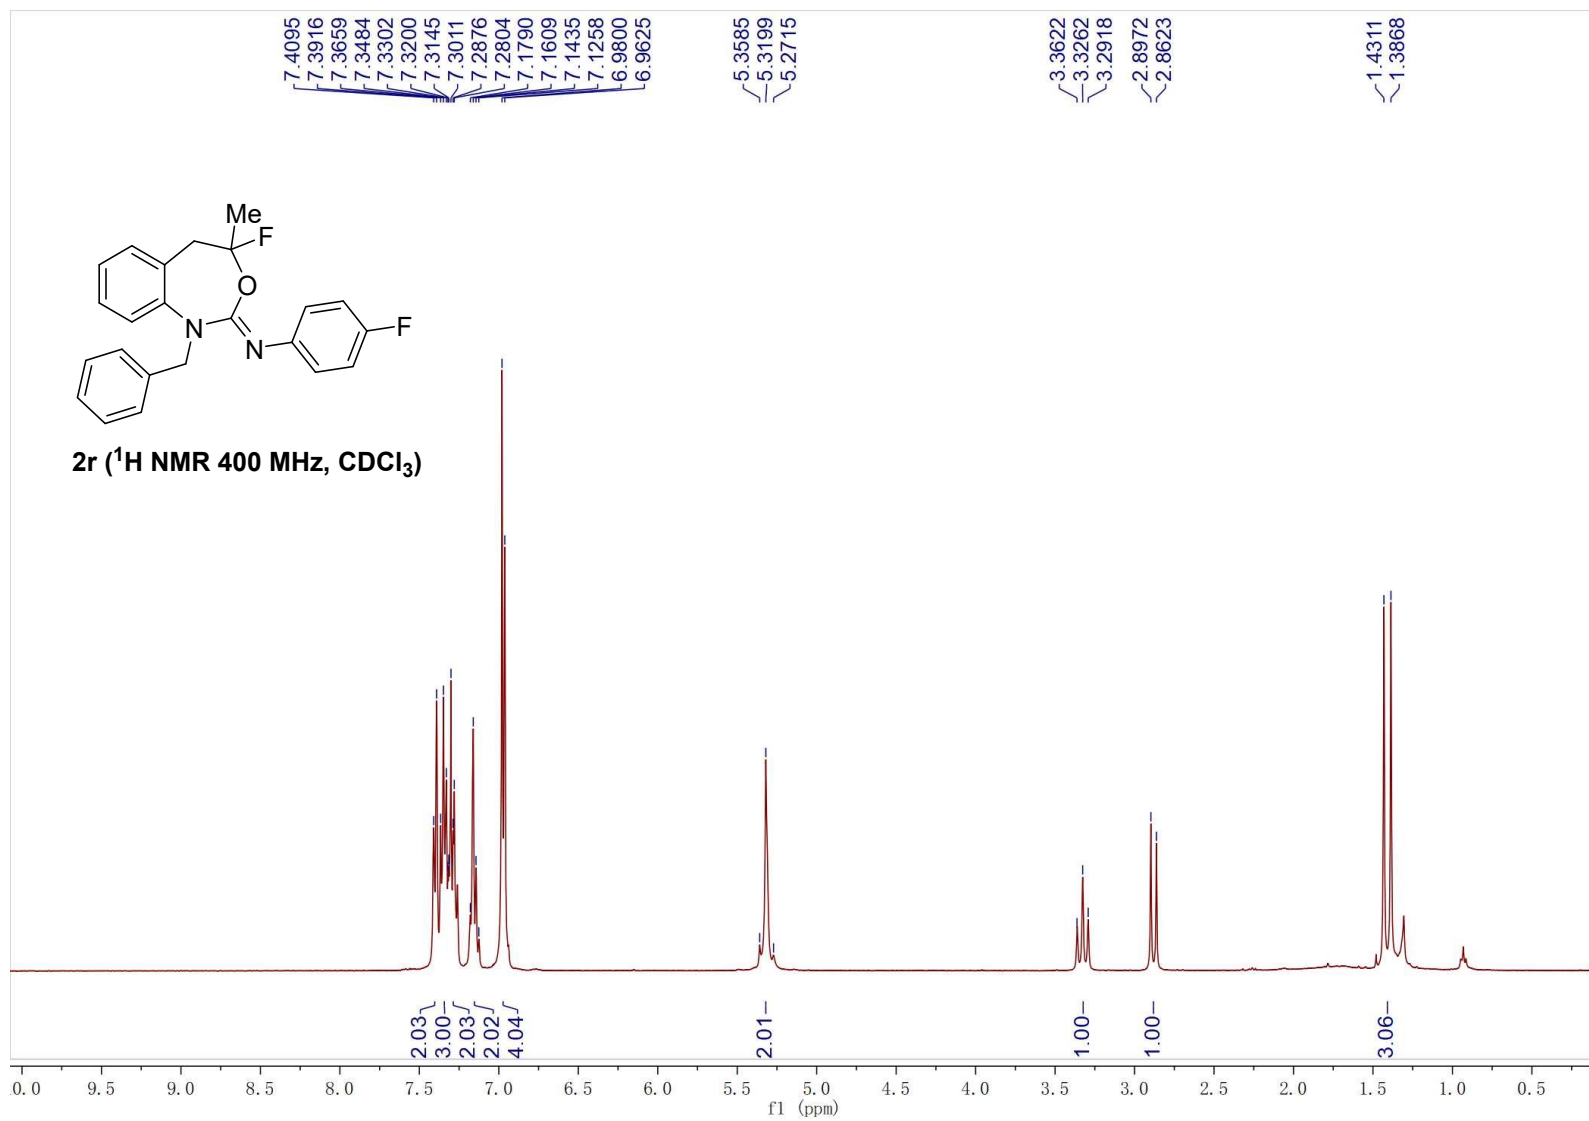

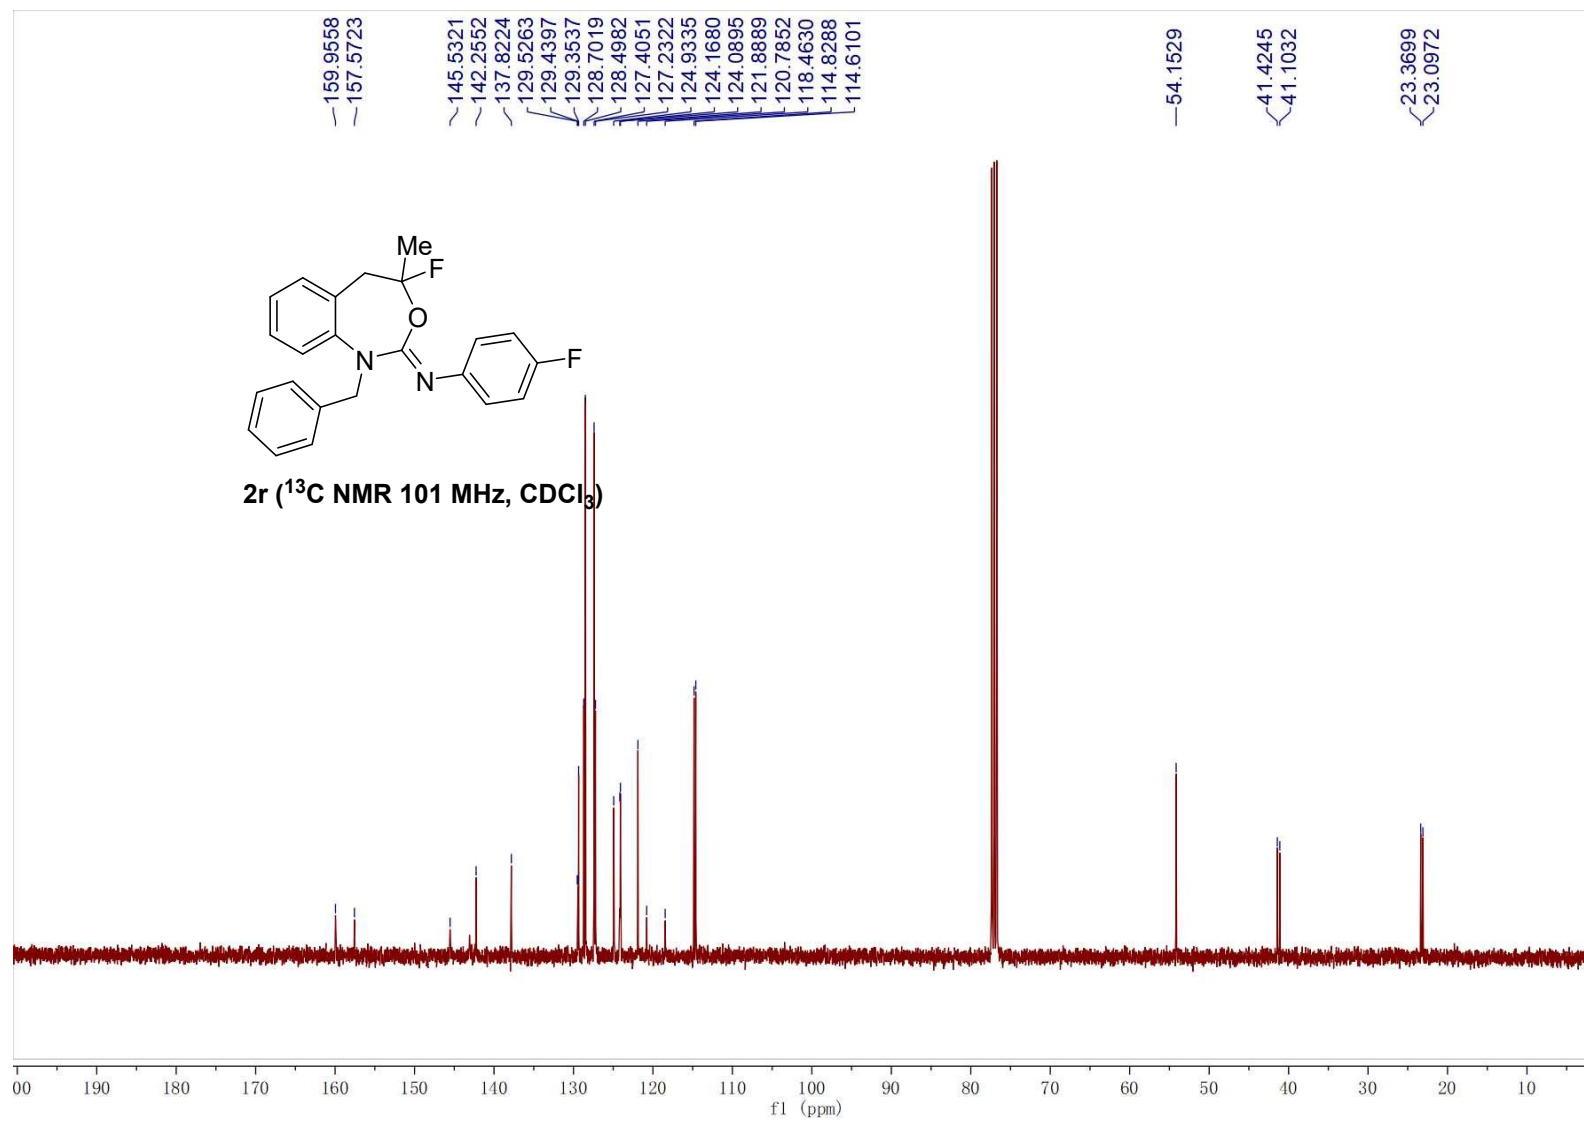

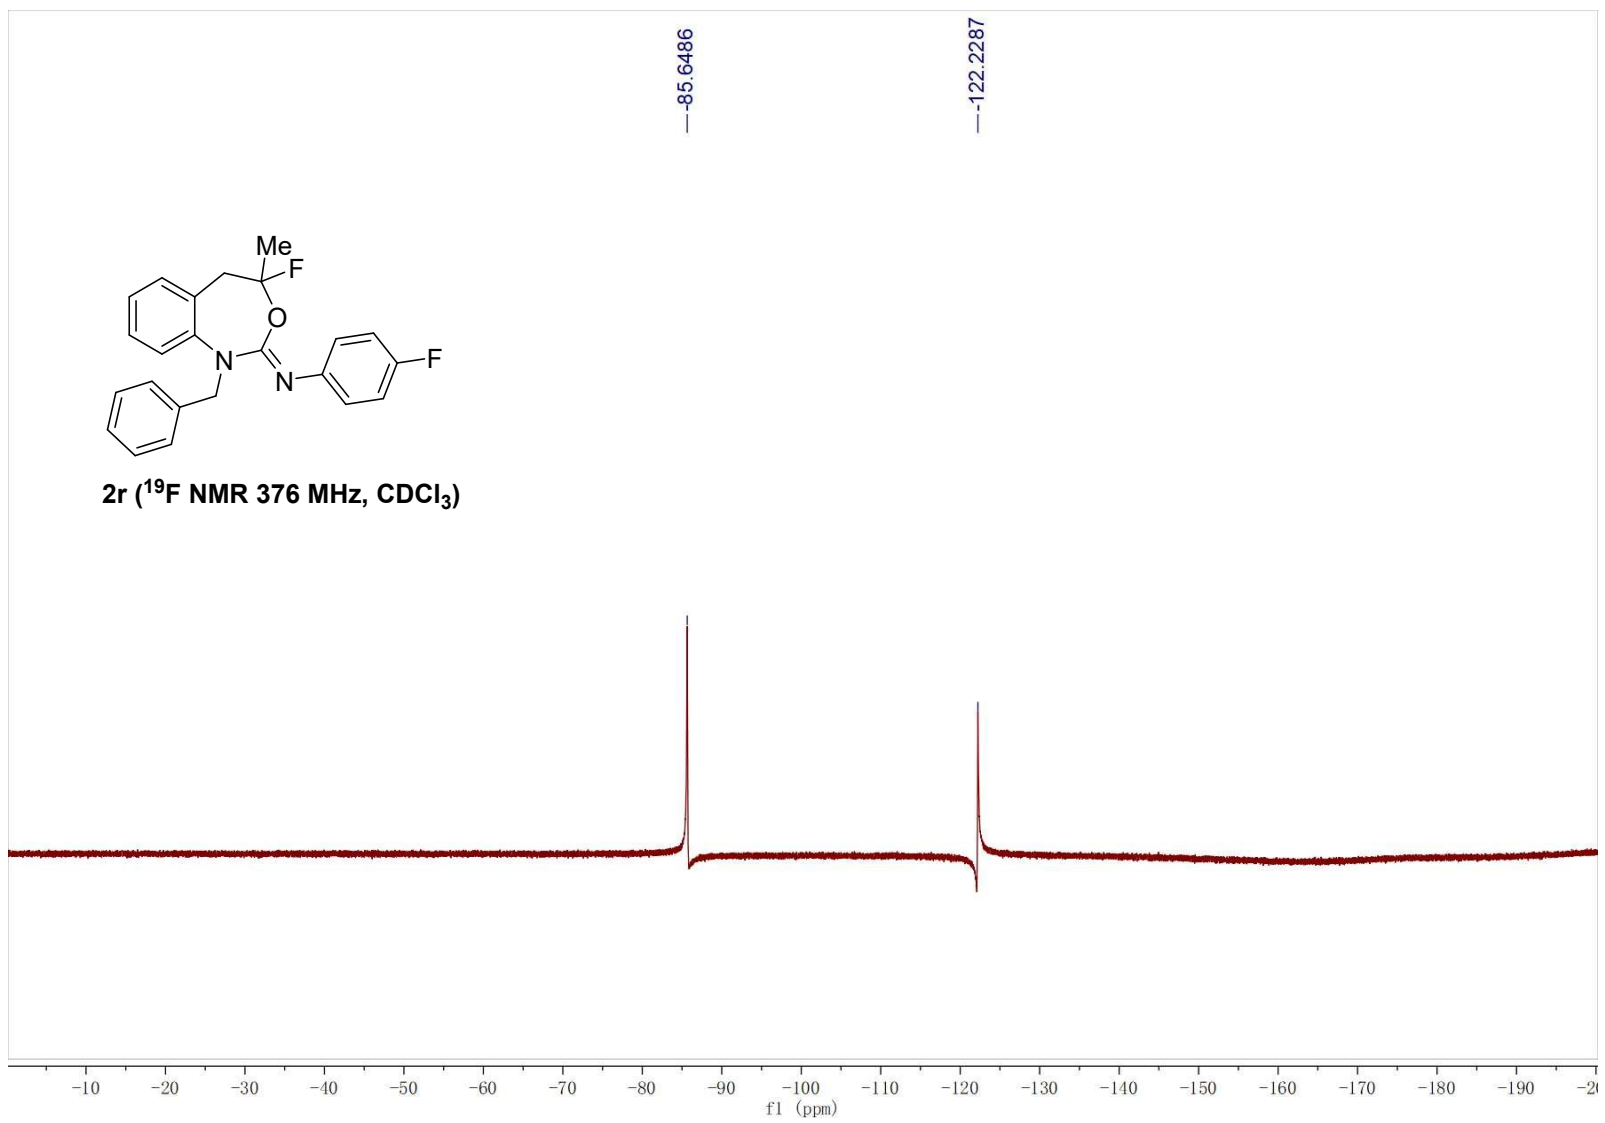

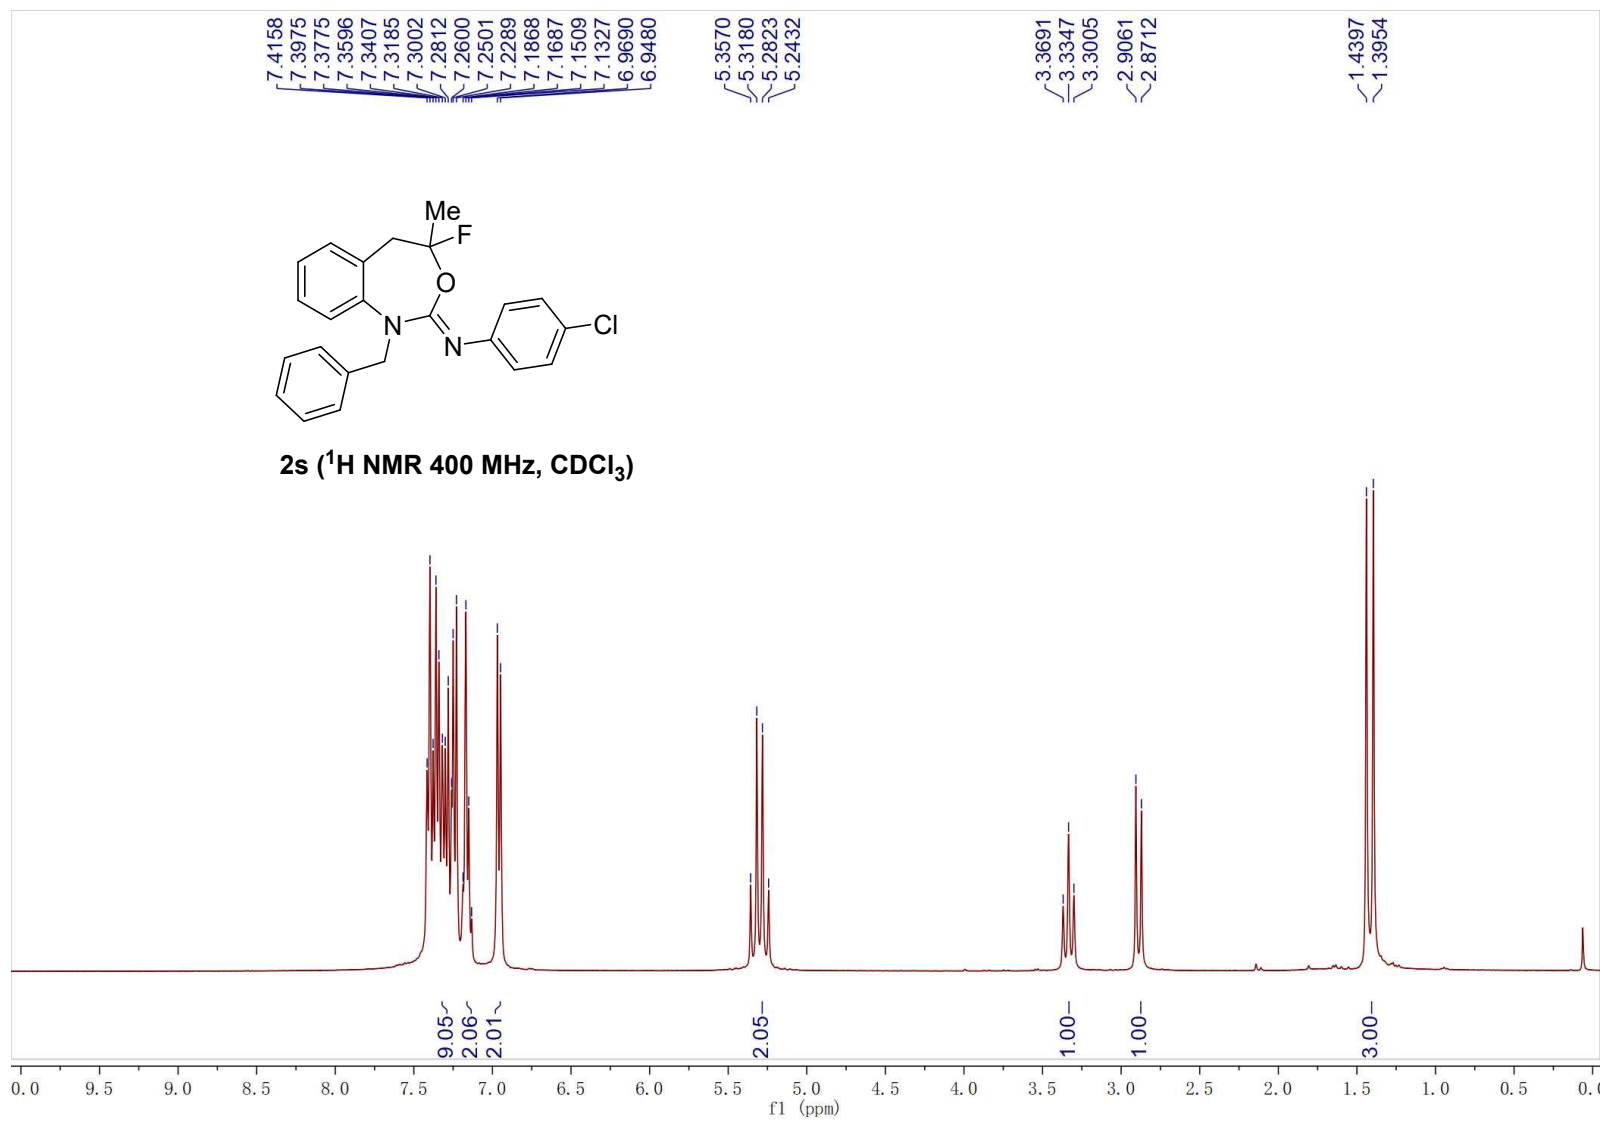



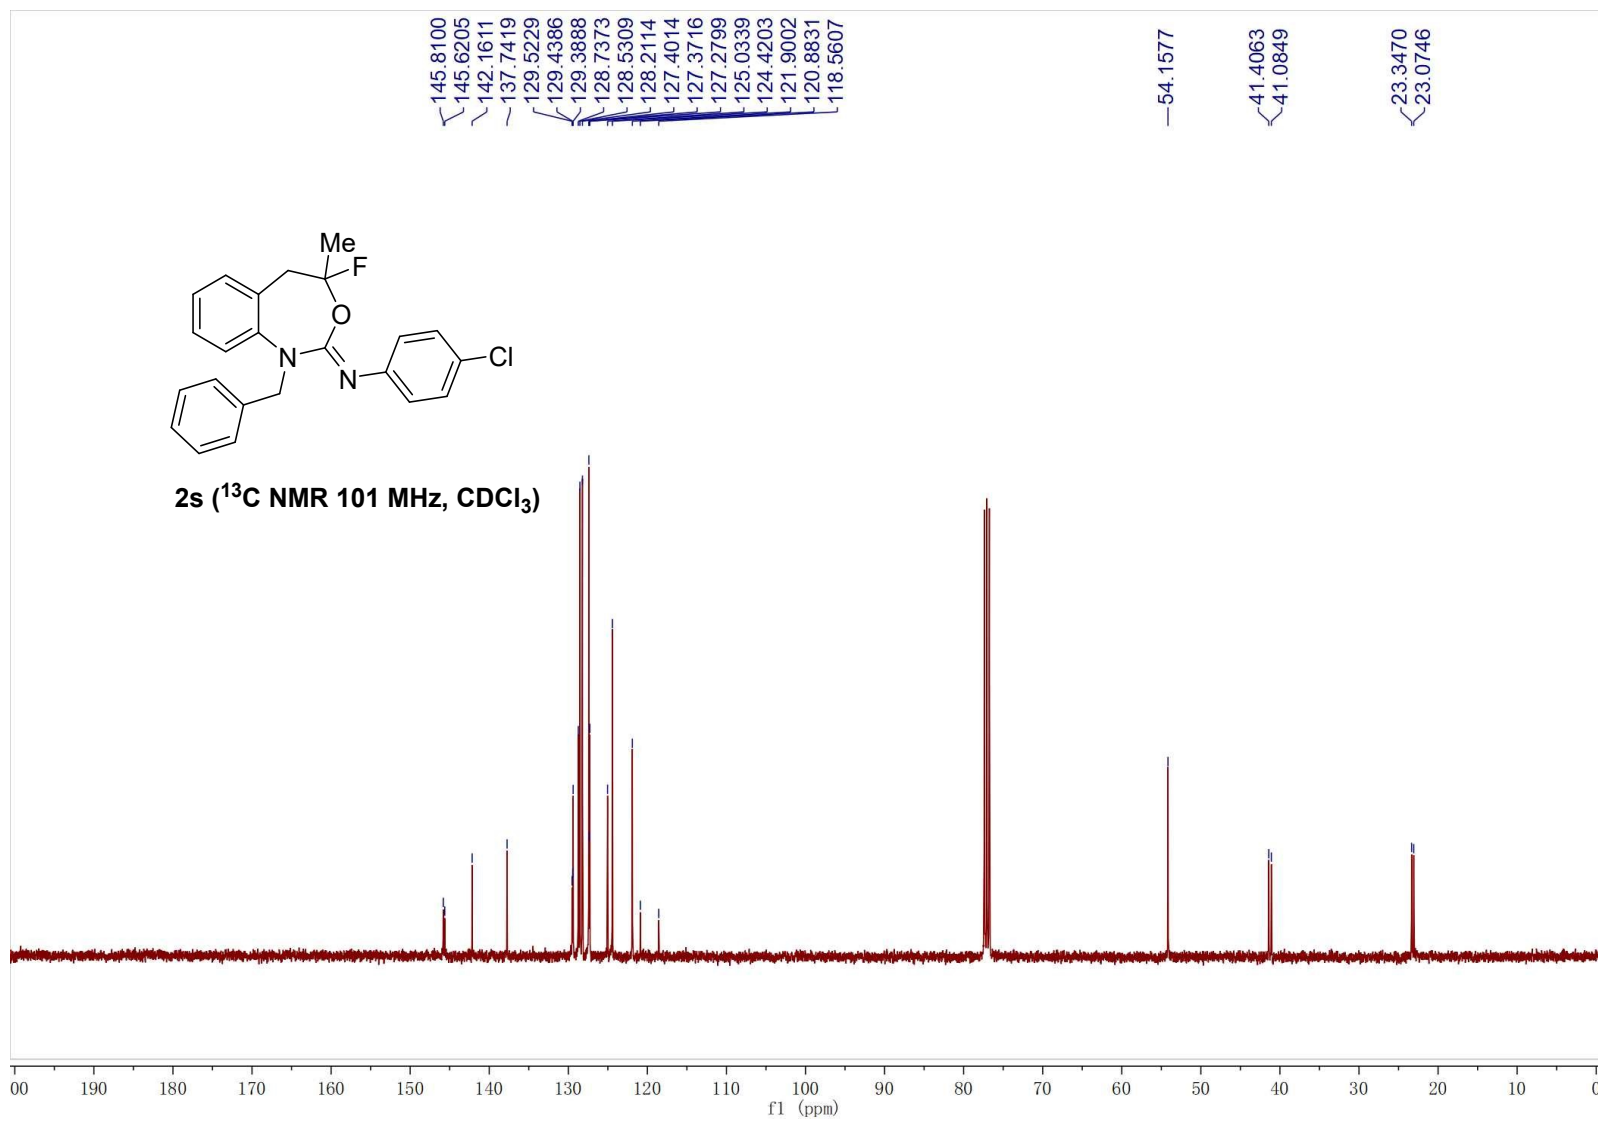

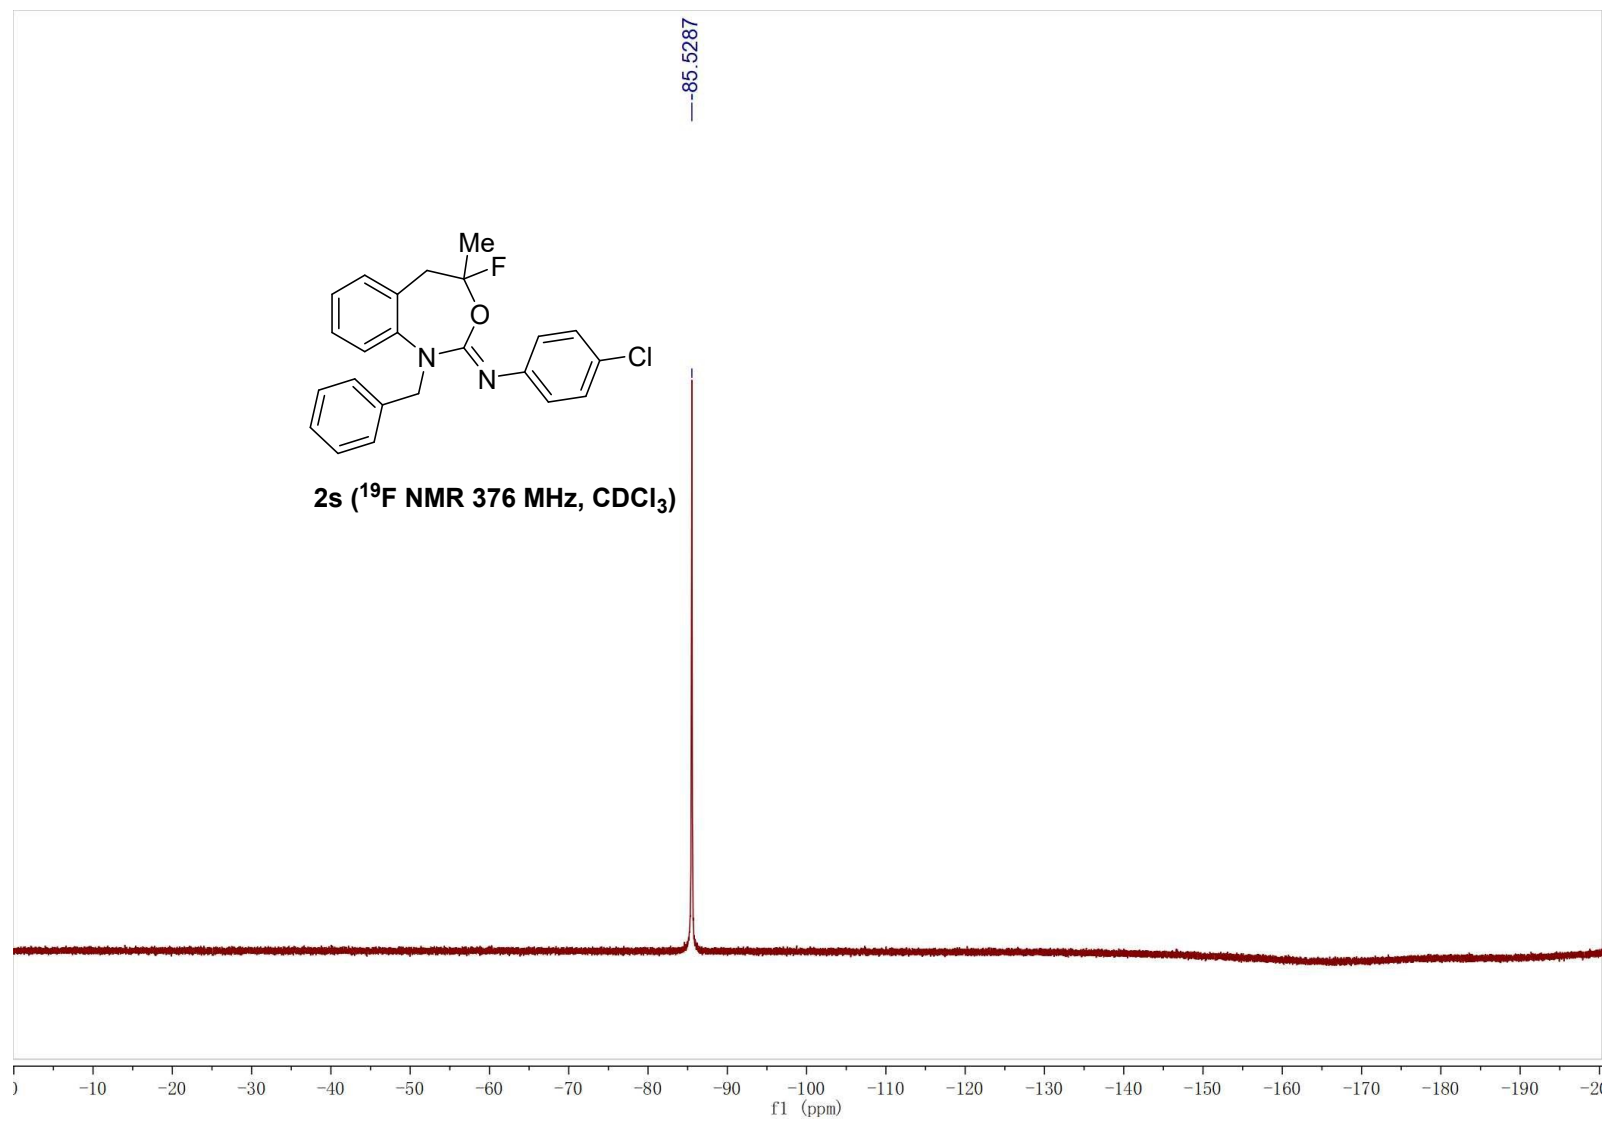

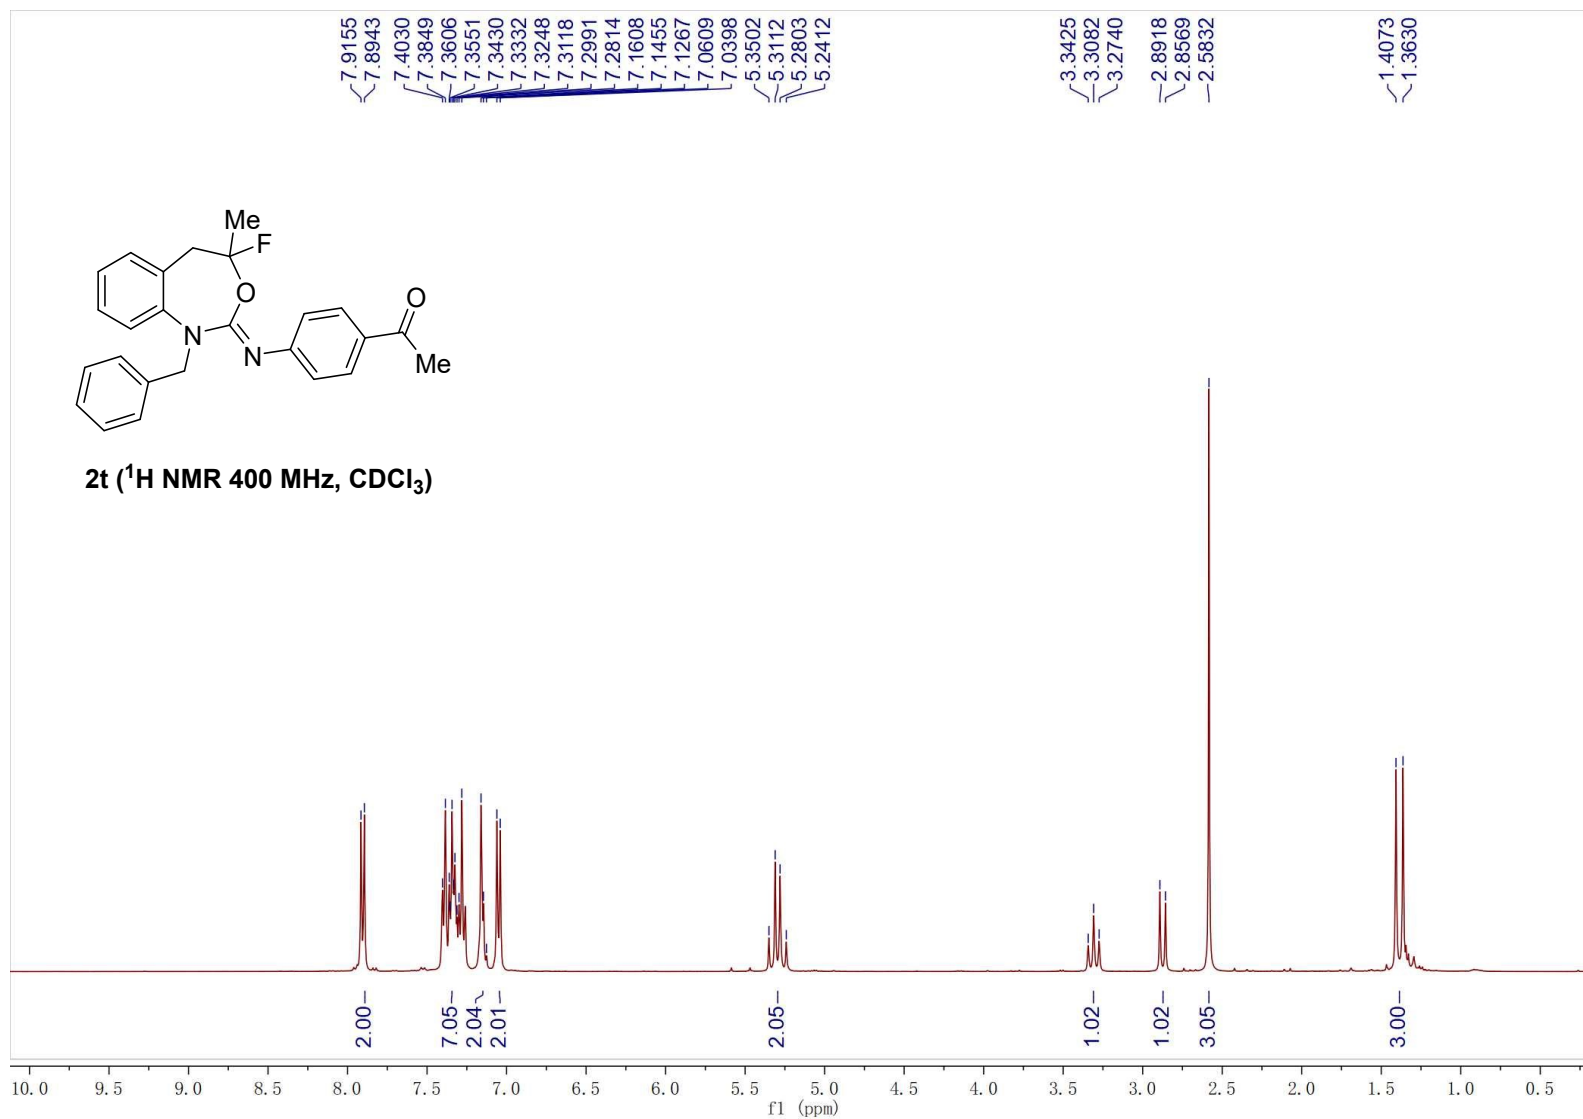

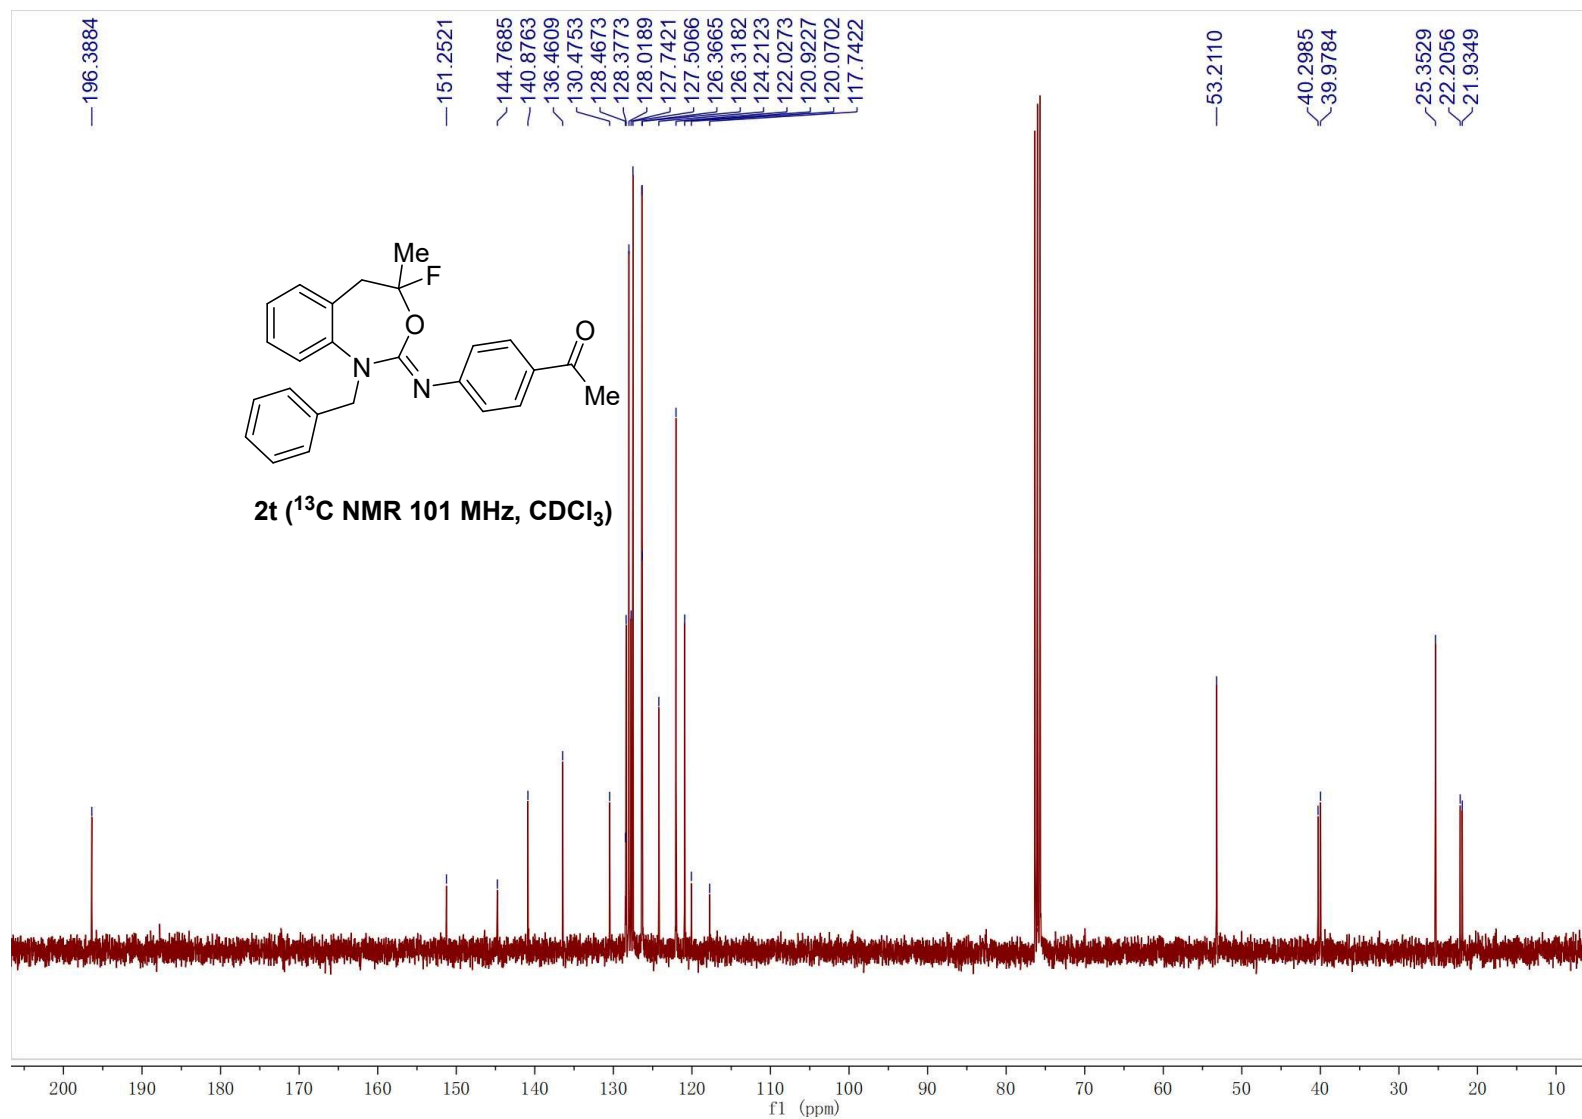

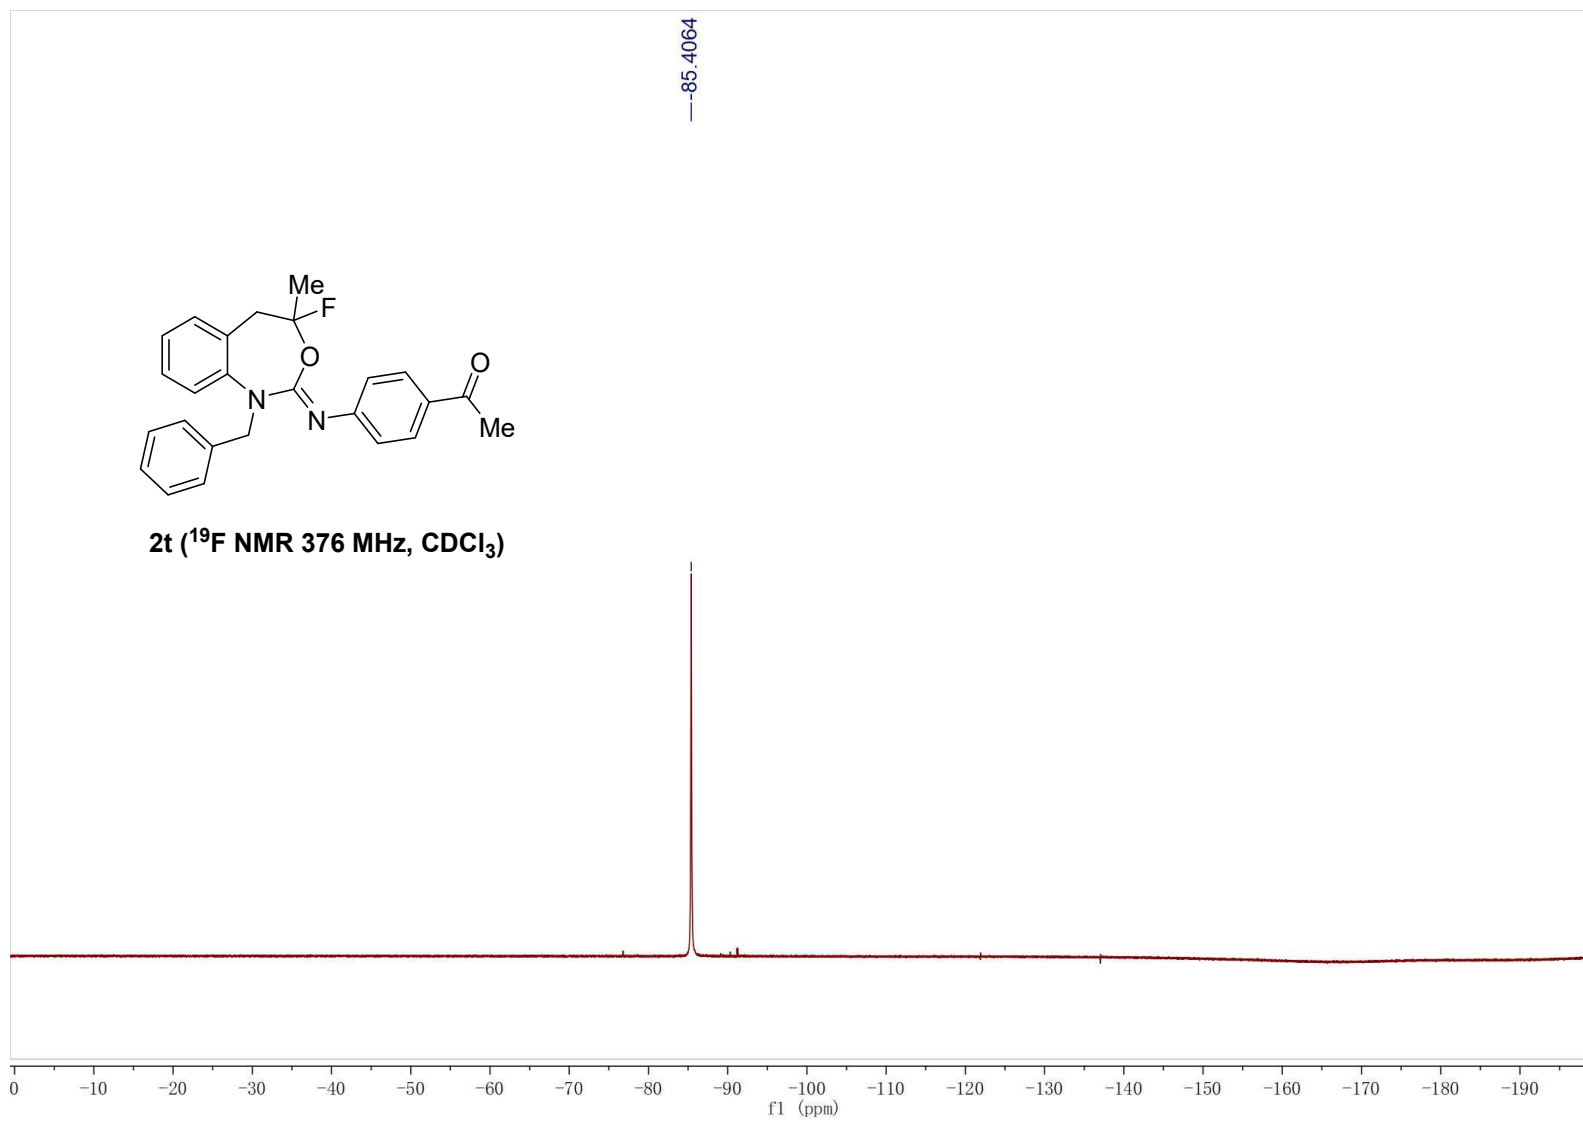

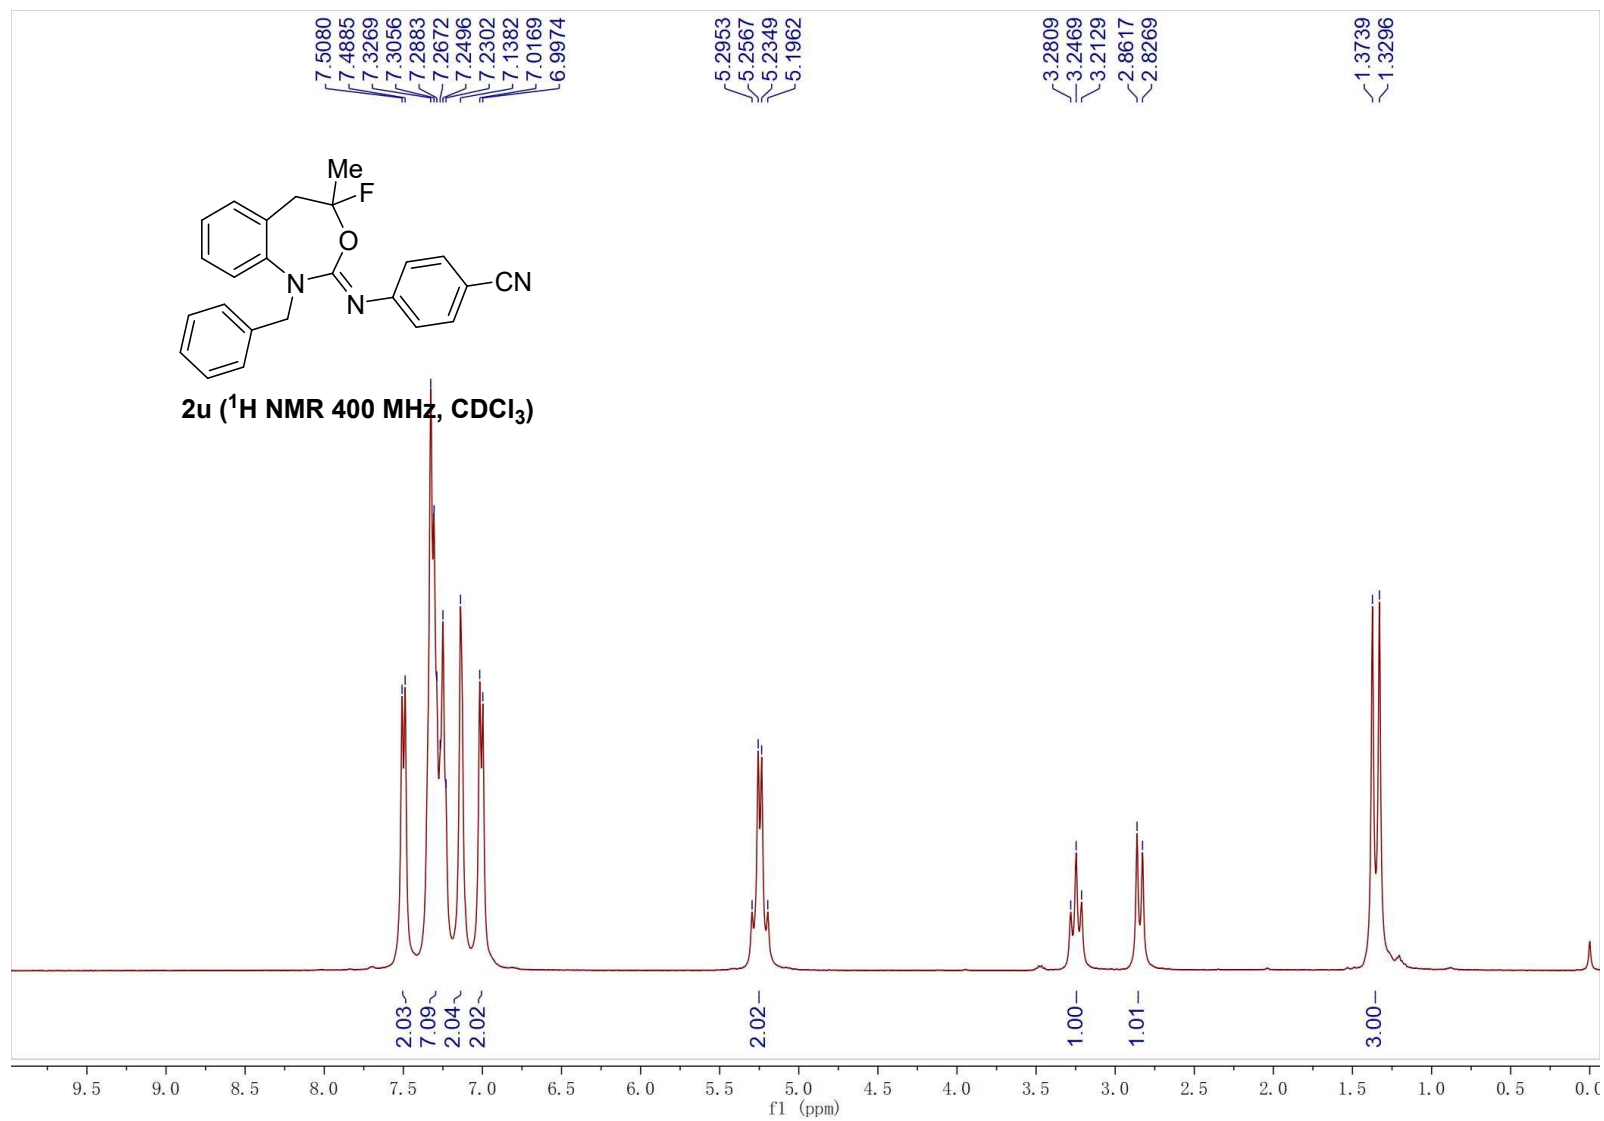

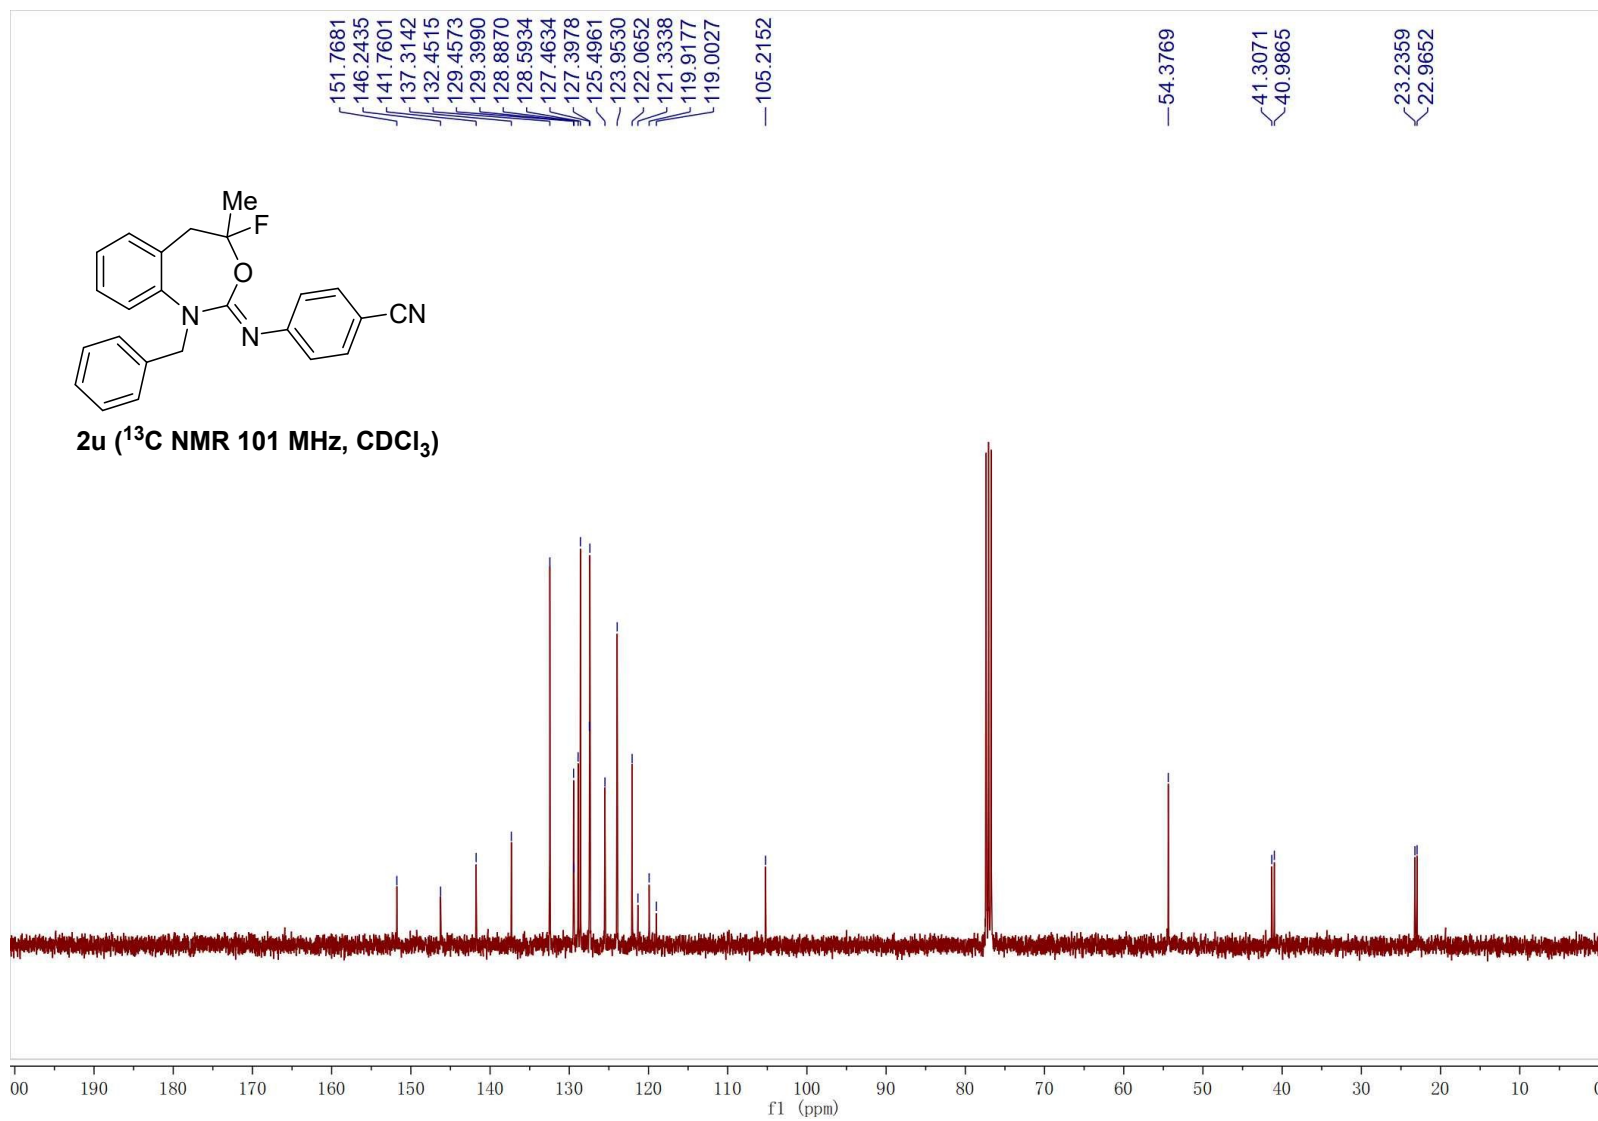

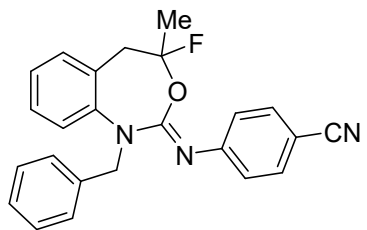

2u ( $^{19}\text{F}$  NMR 376 MHz,  $\text{CDCl}_3$ )

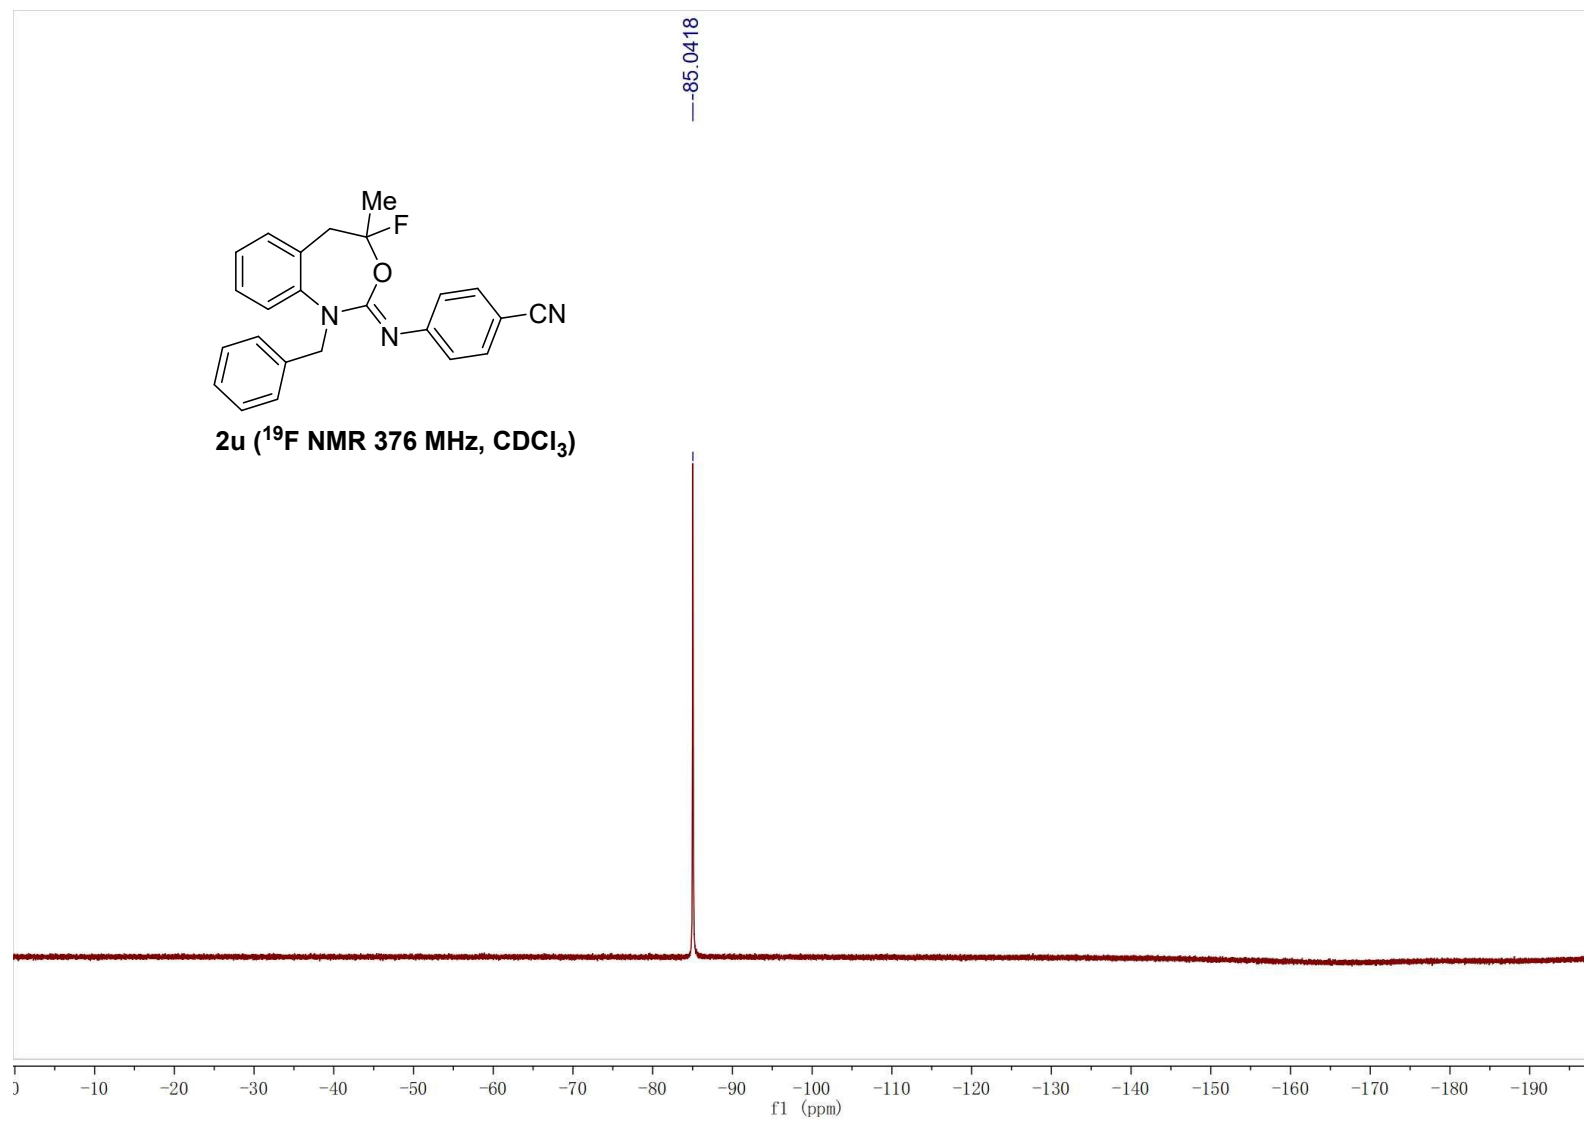



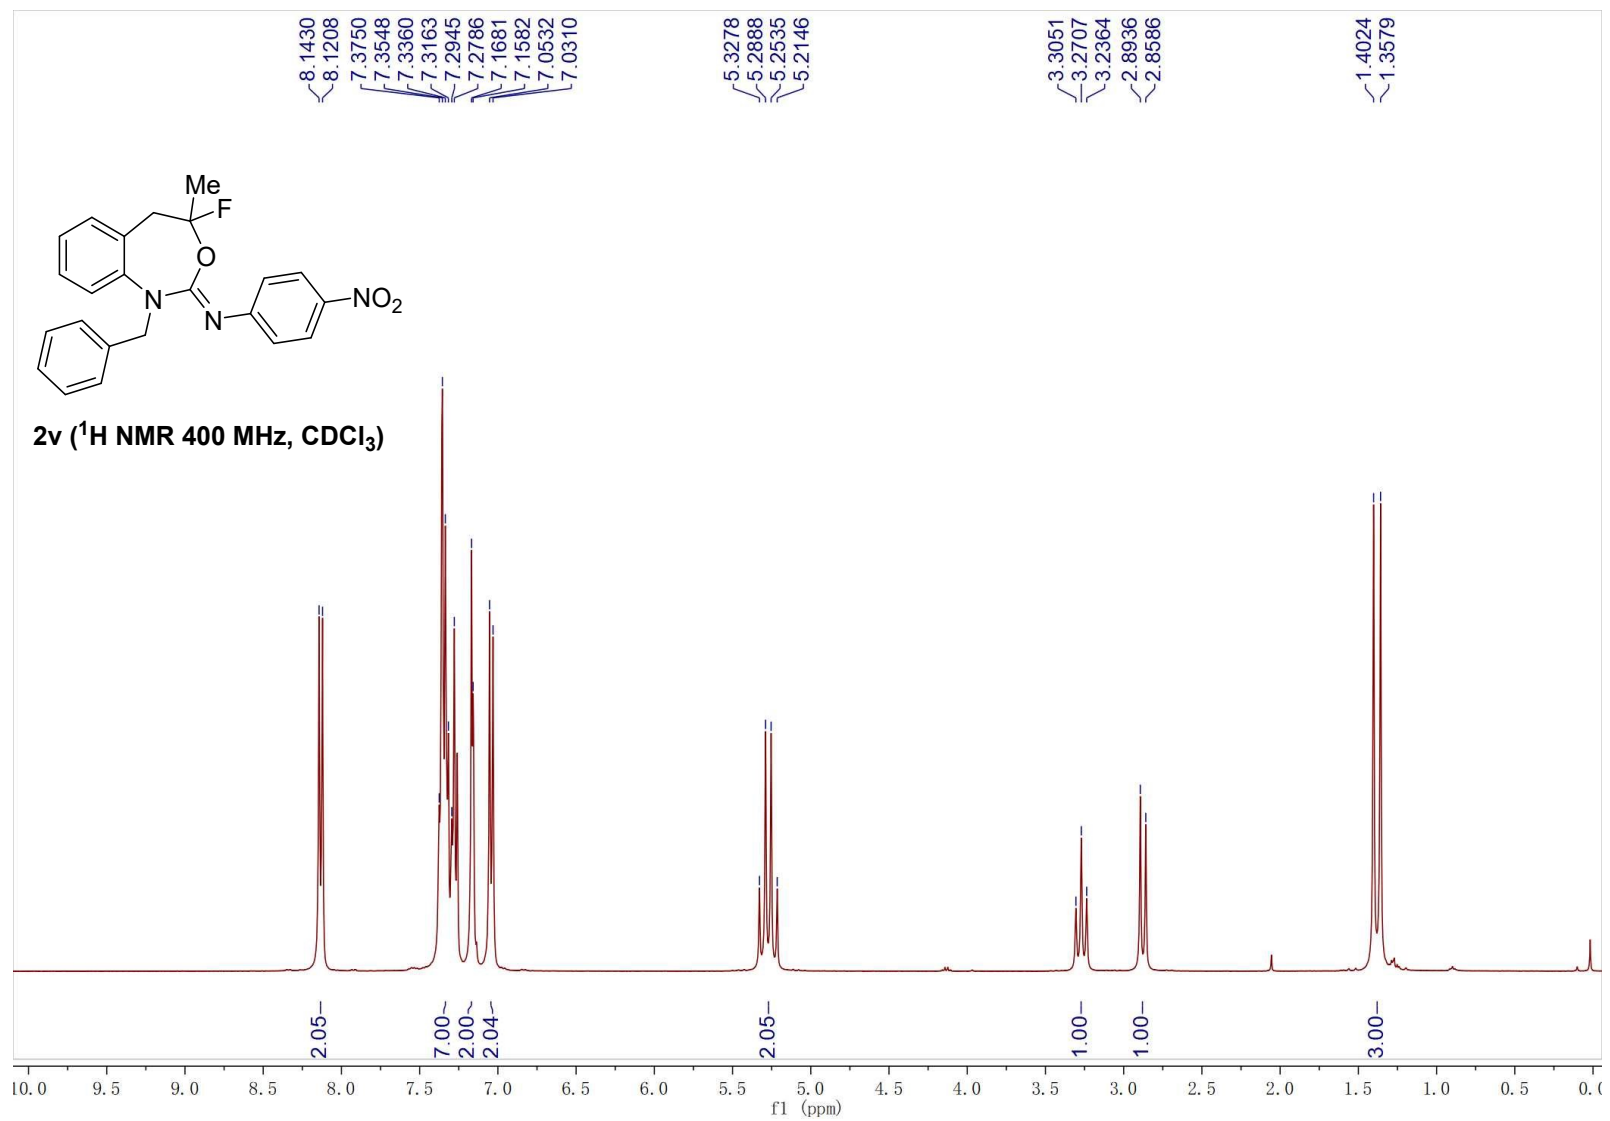

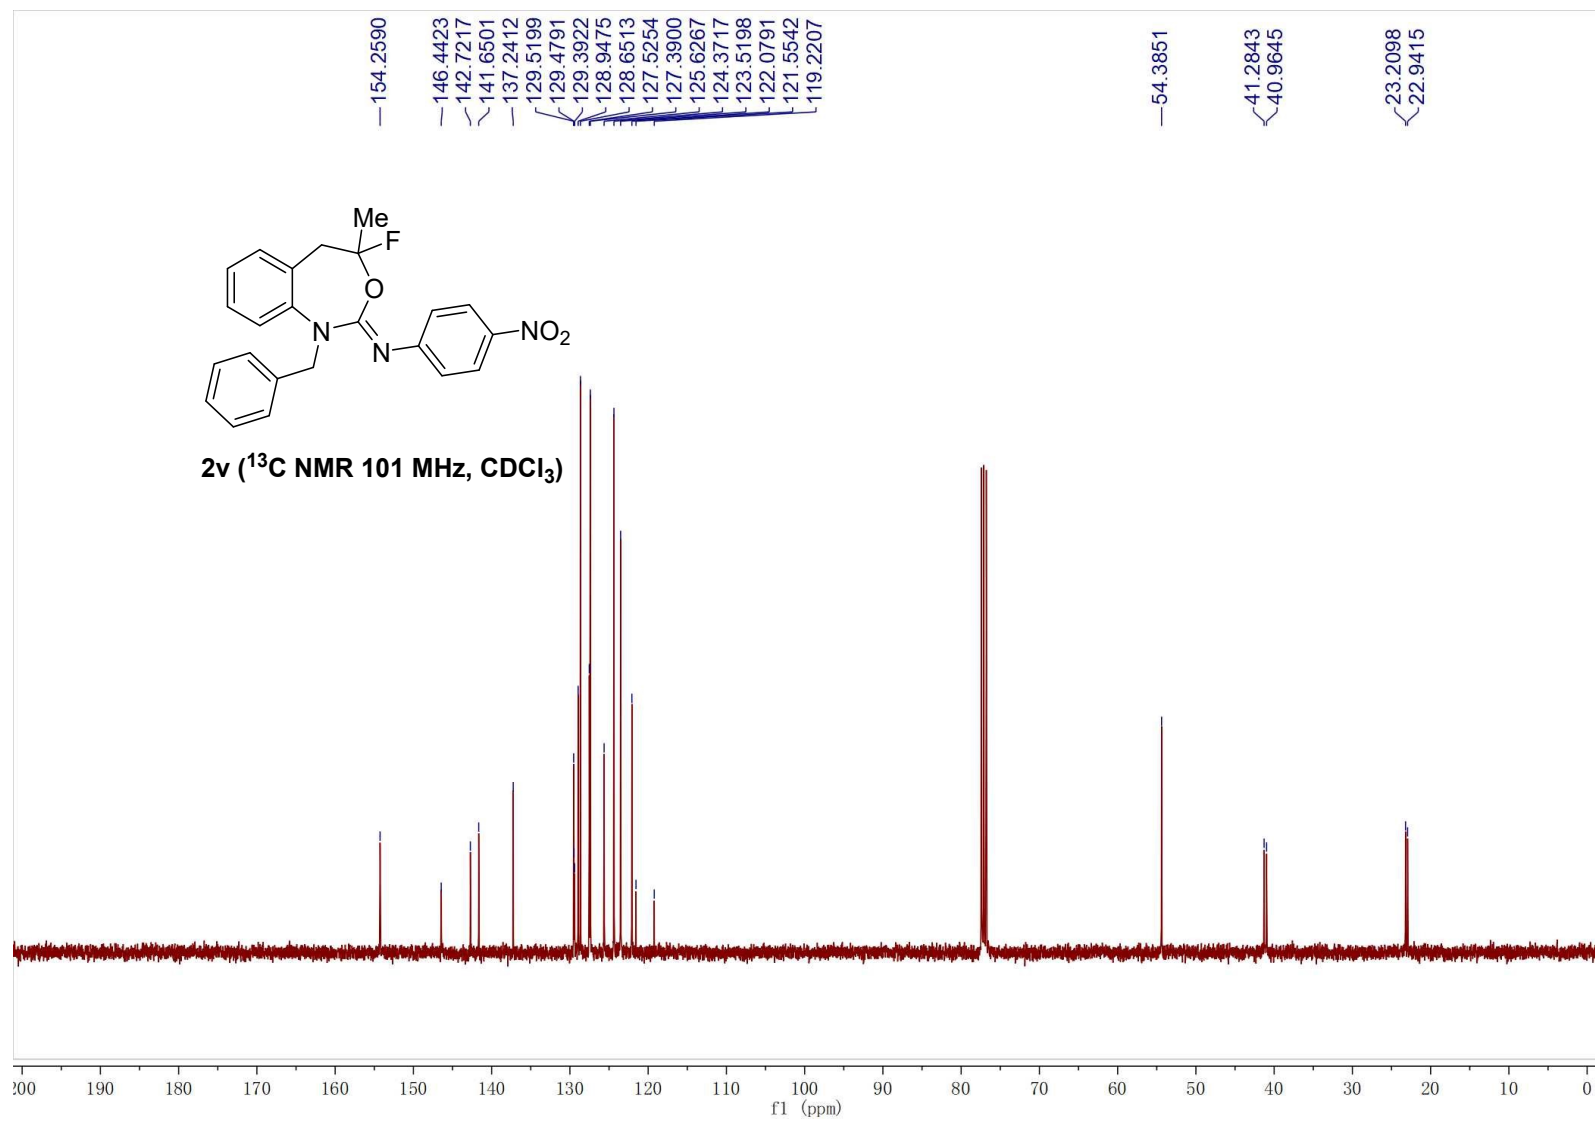

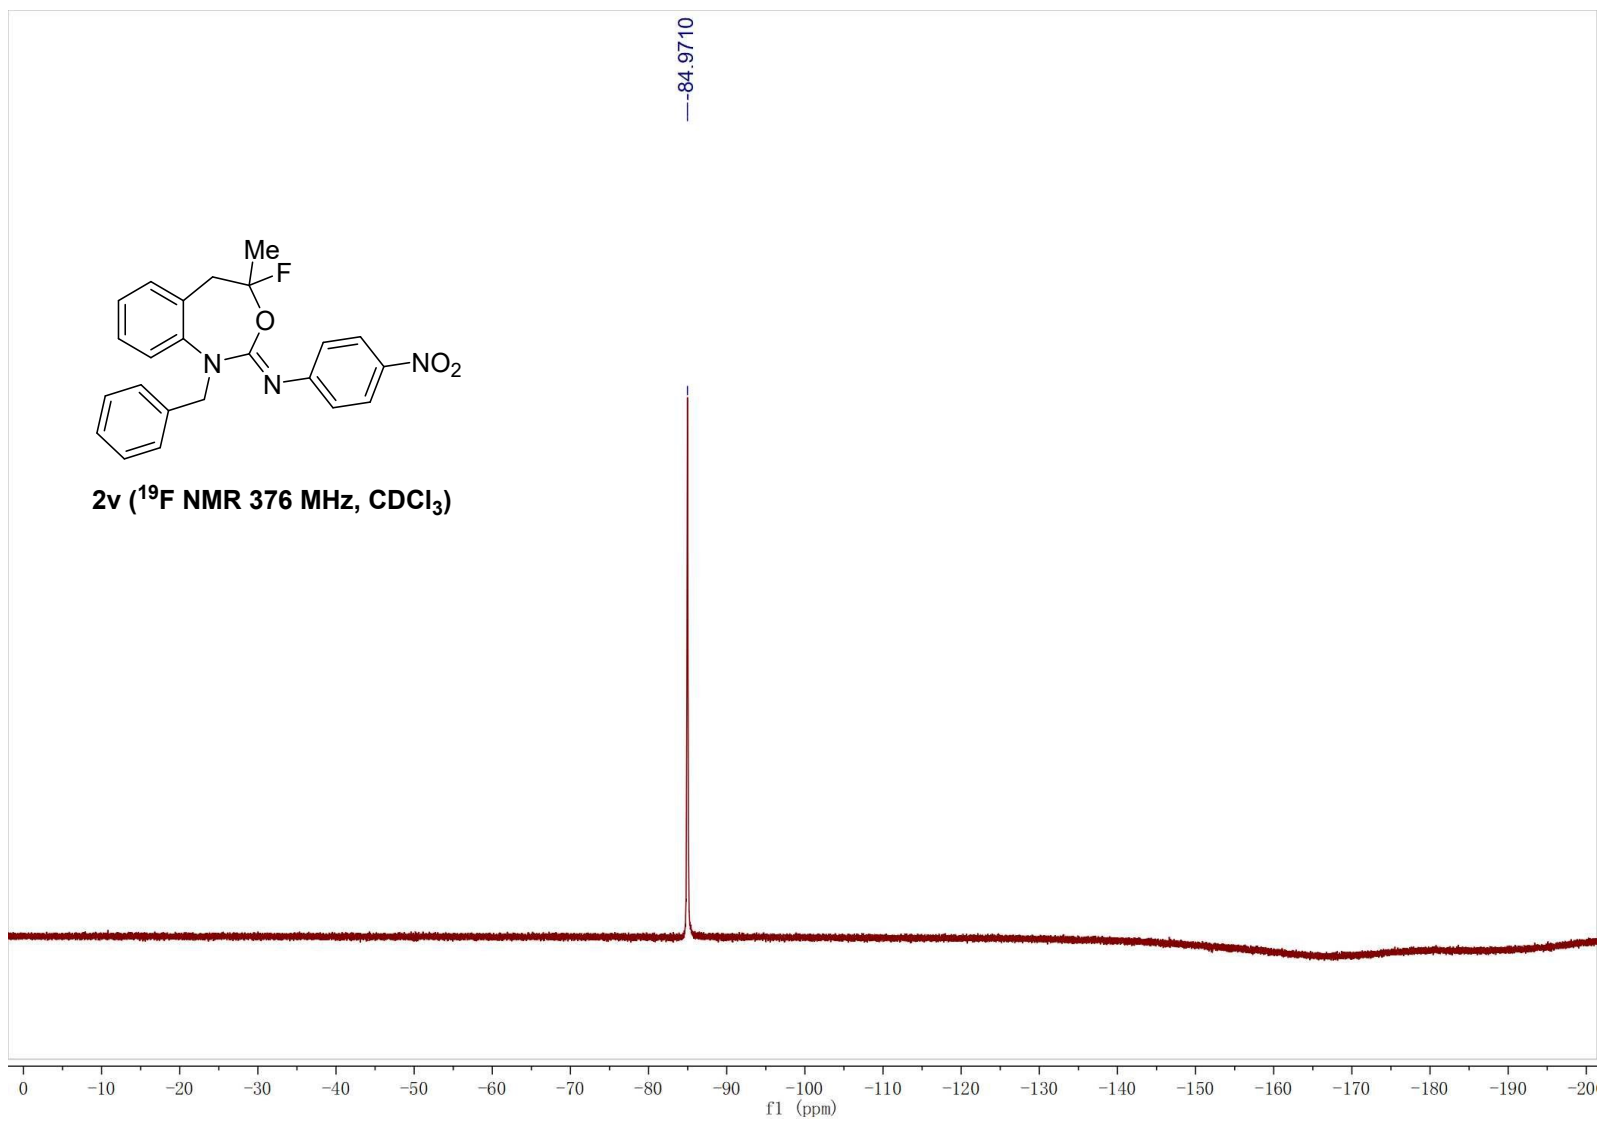

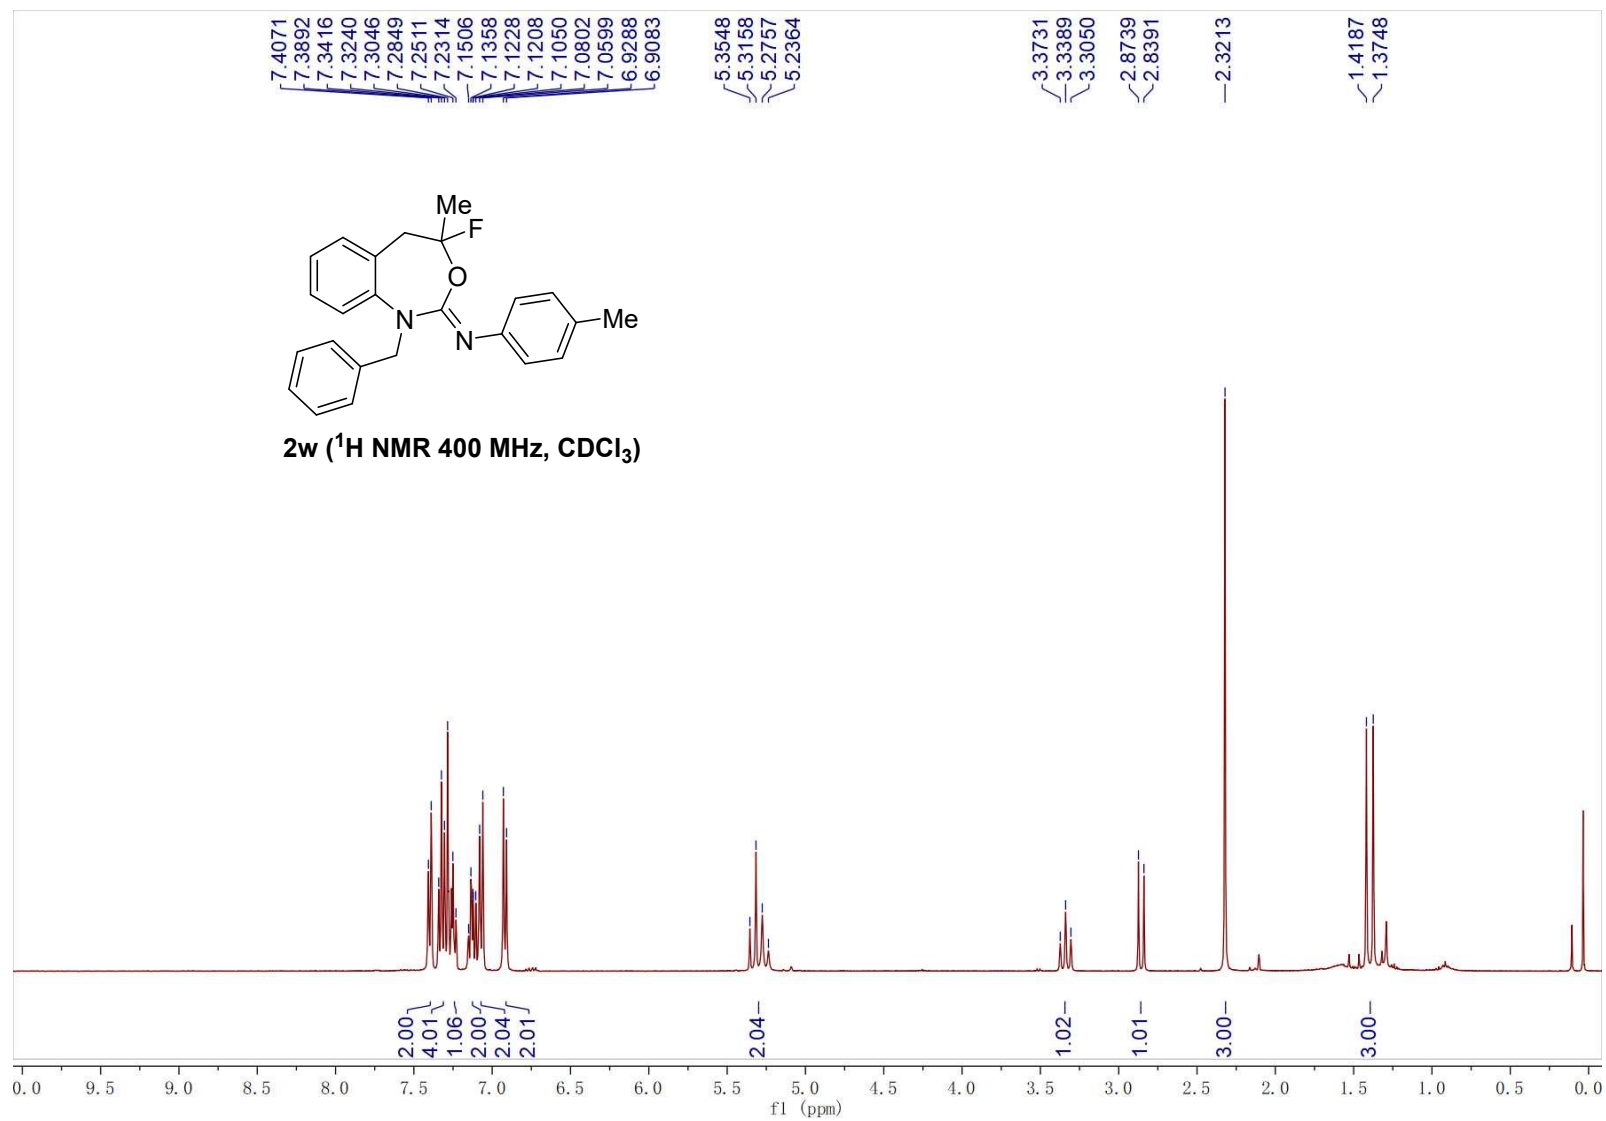

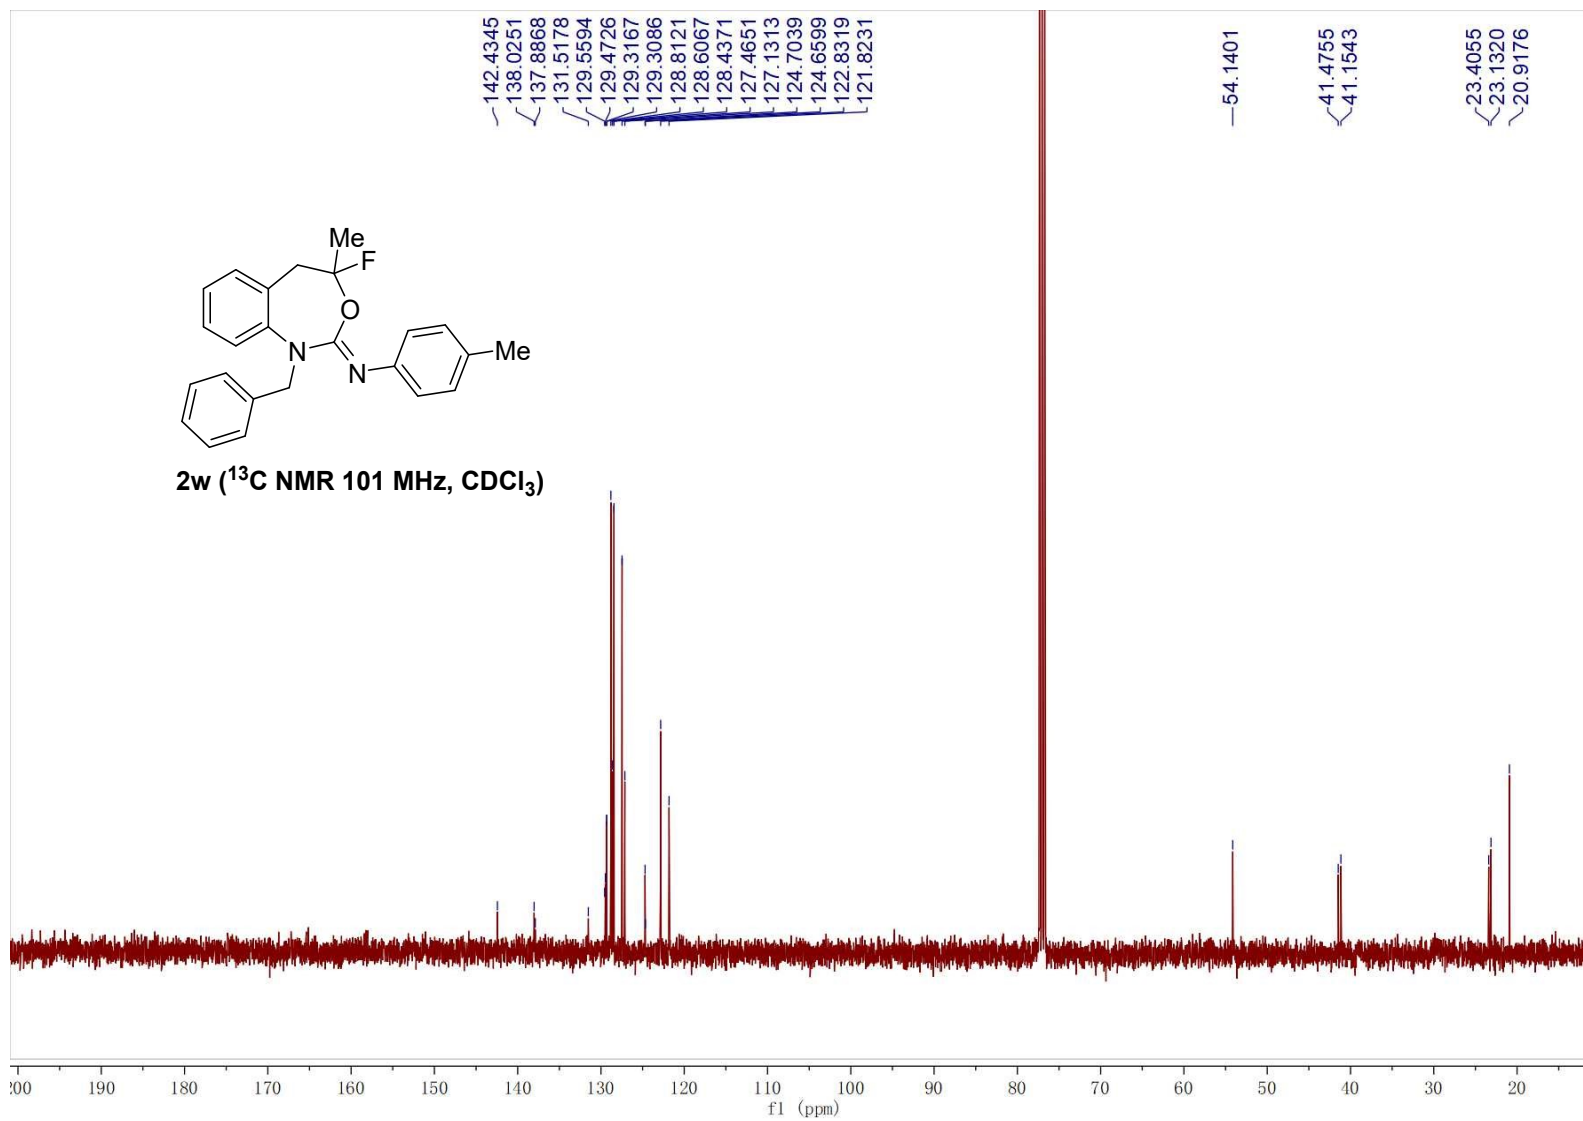

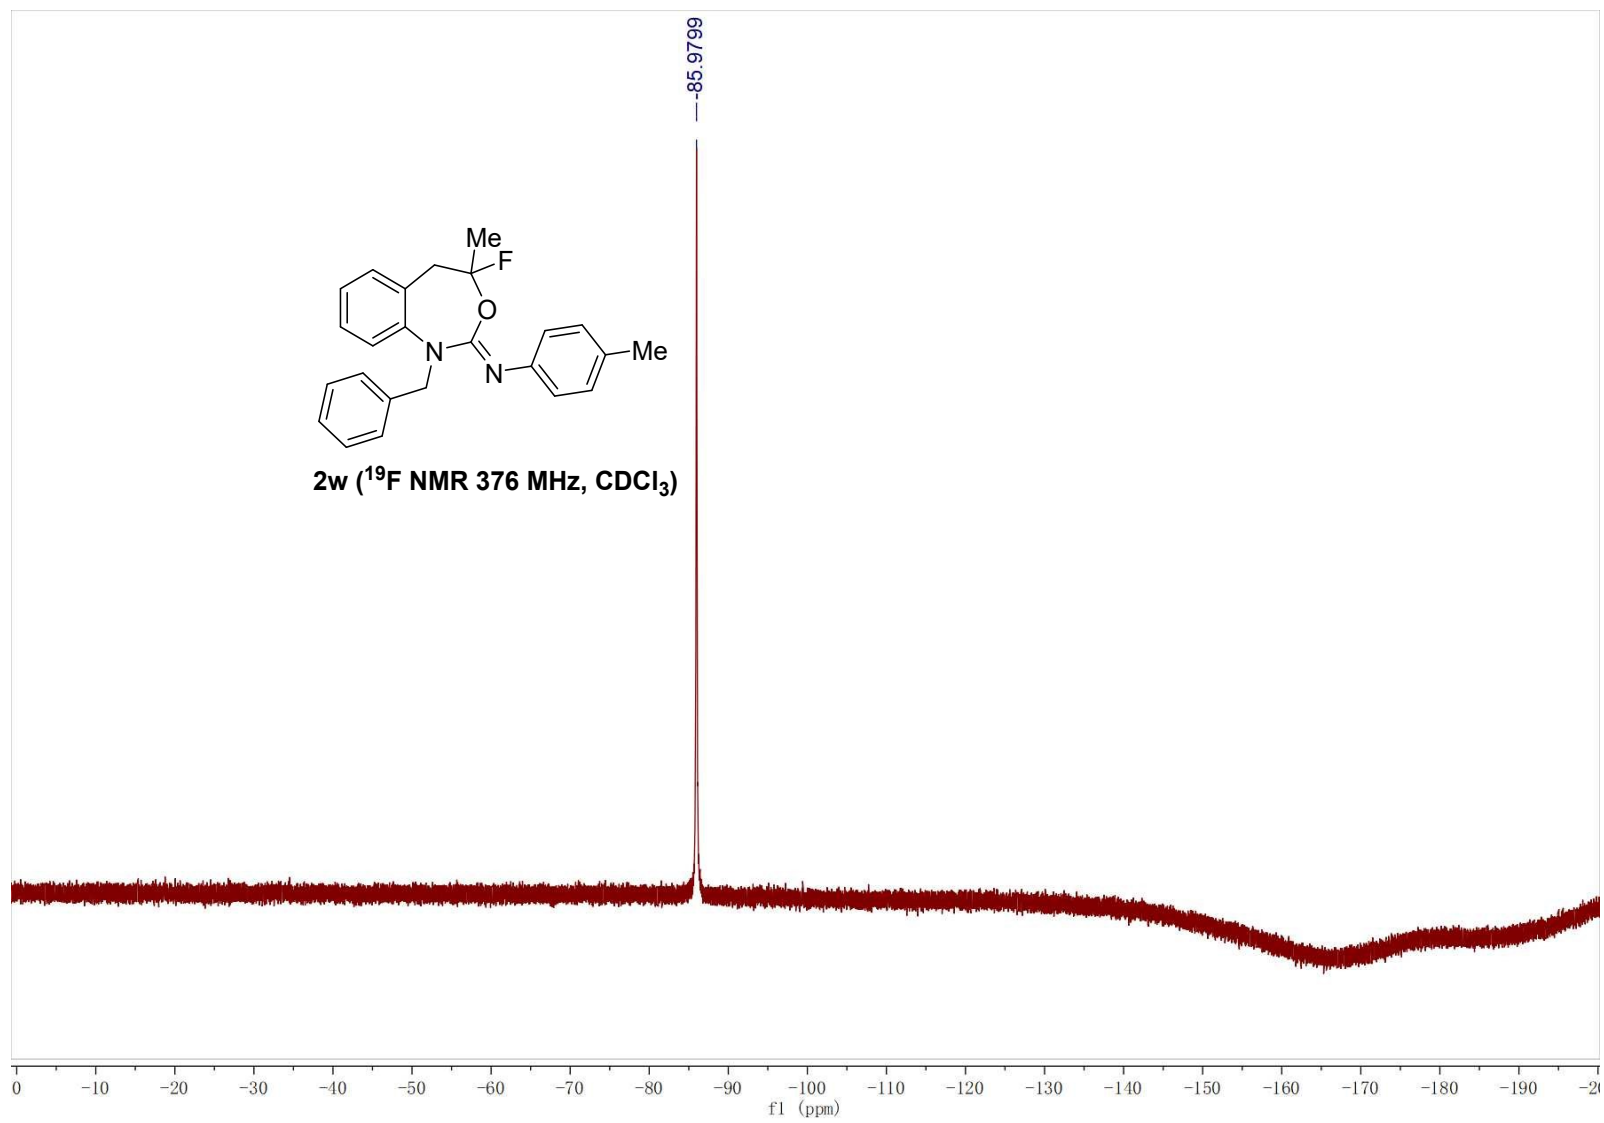

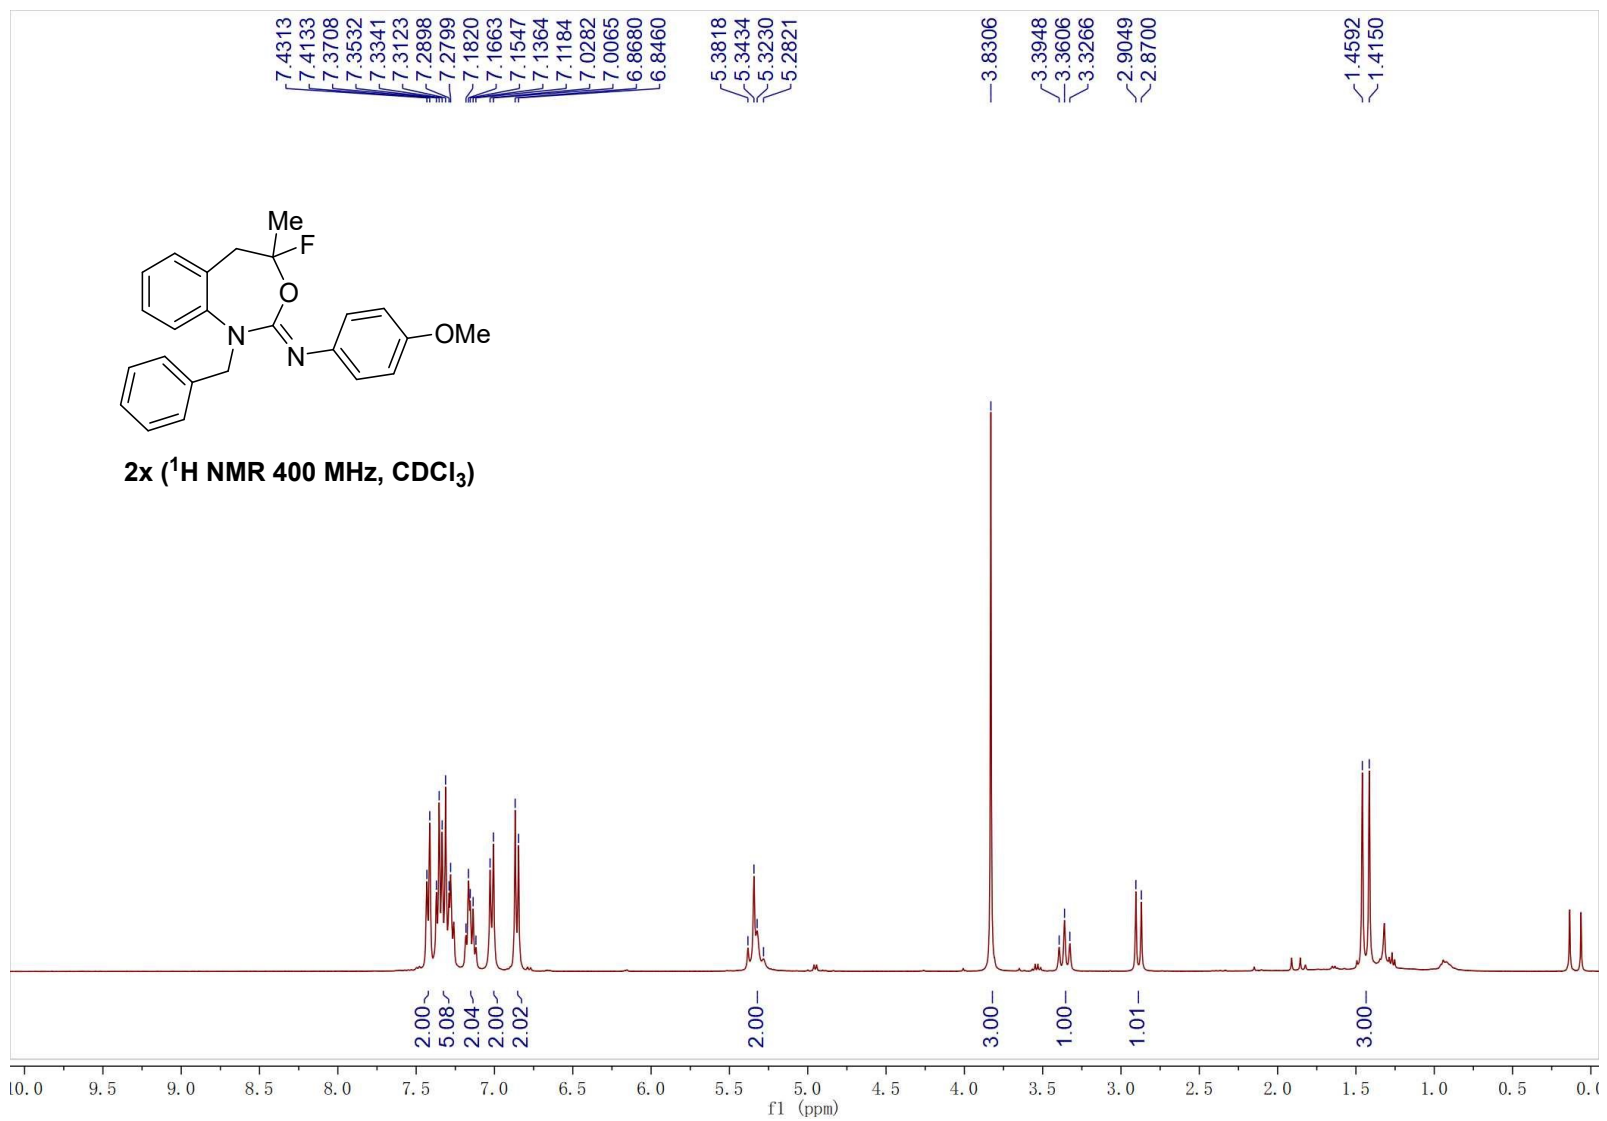

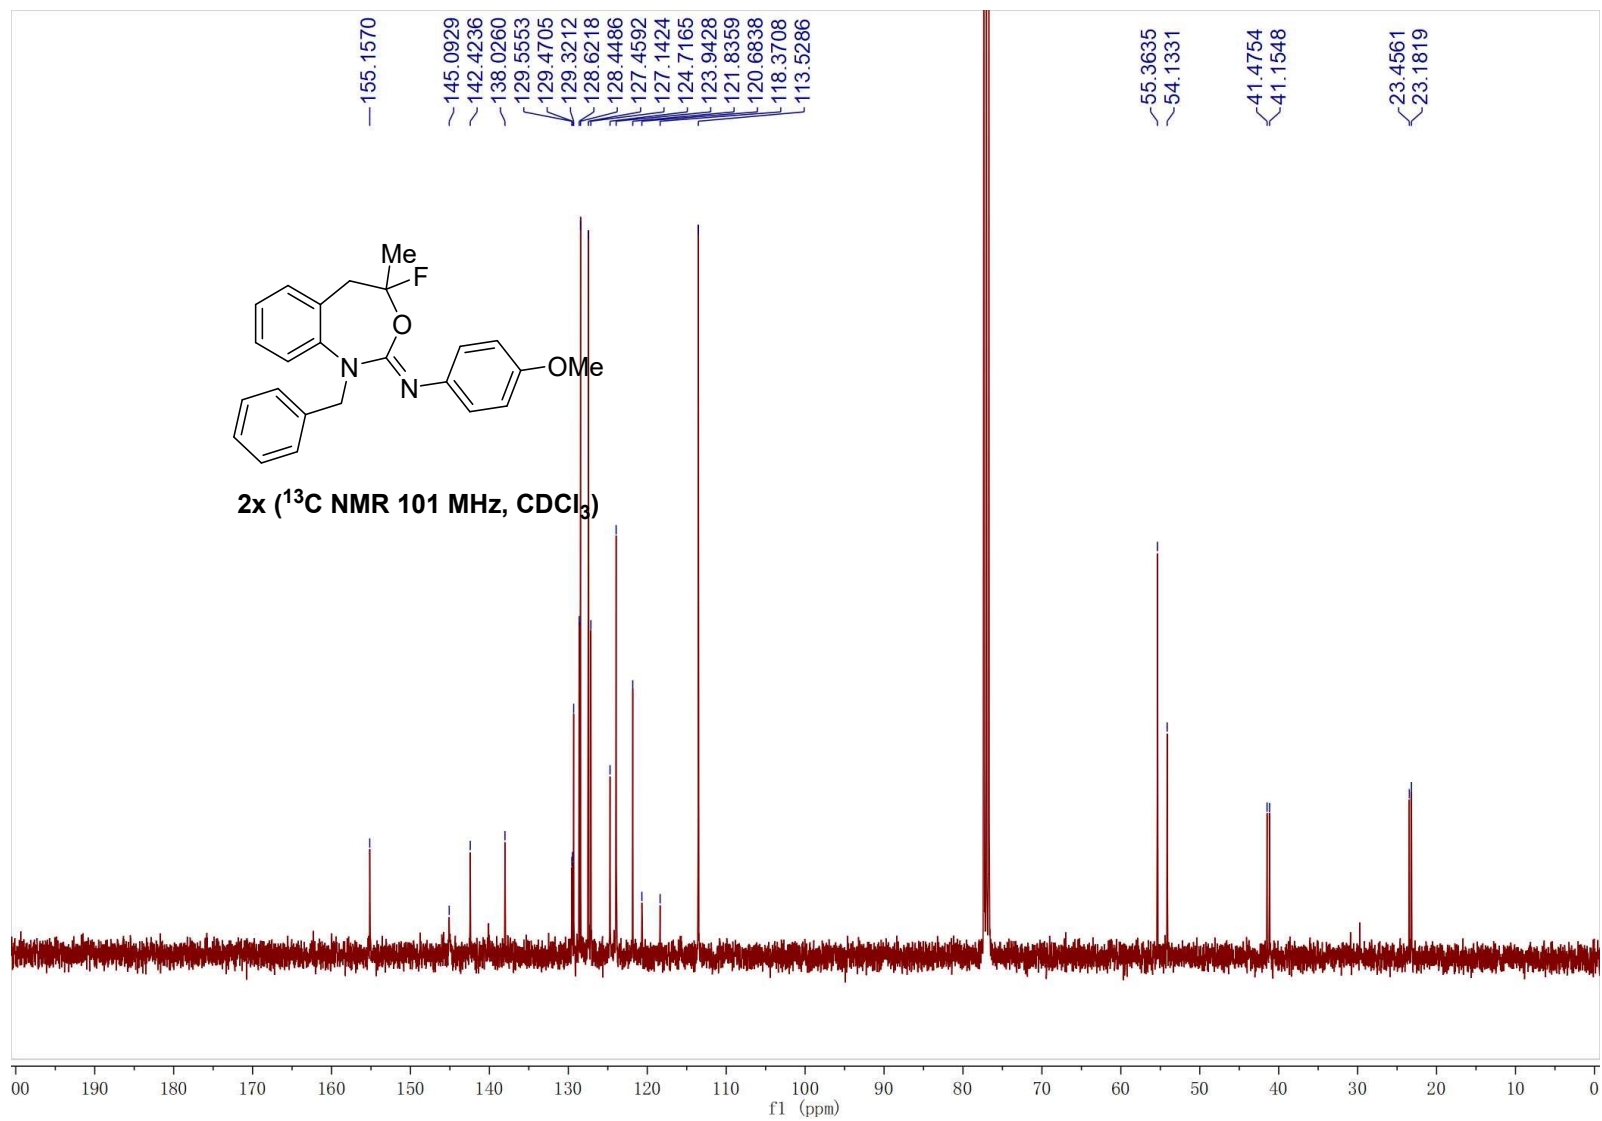



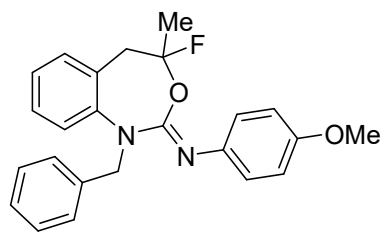

2x (<sup>19</sup>F NMR 376 MHz, CDCl<sub>3</sub>)

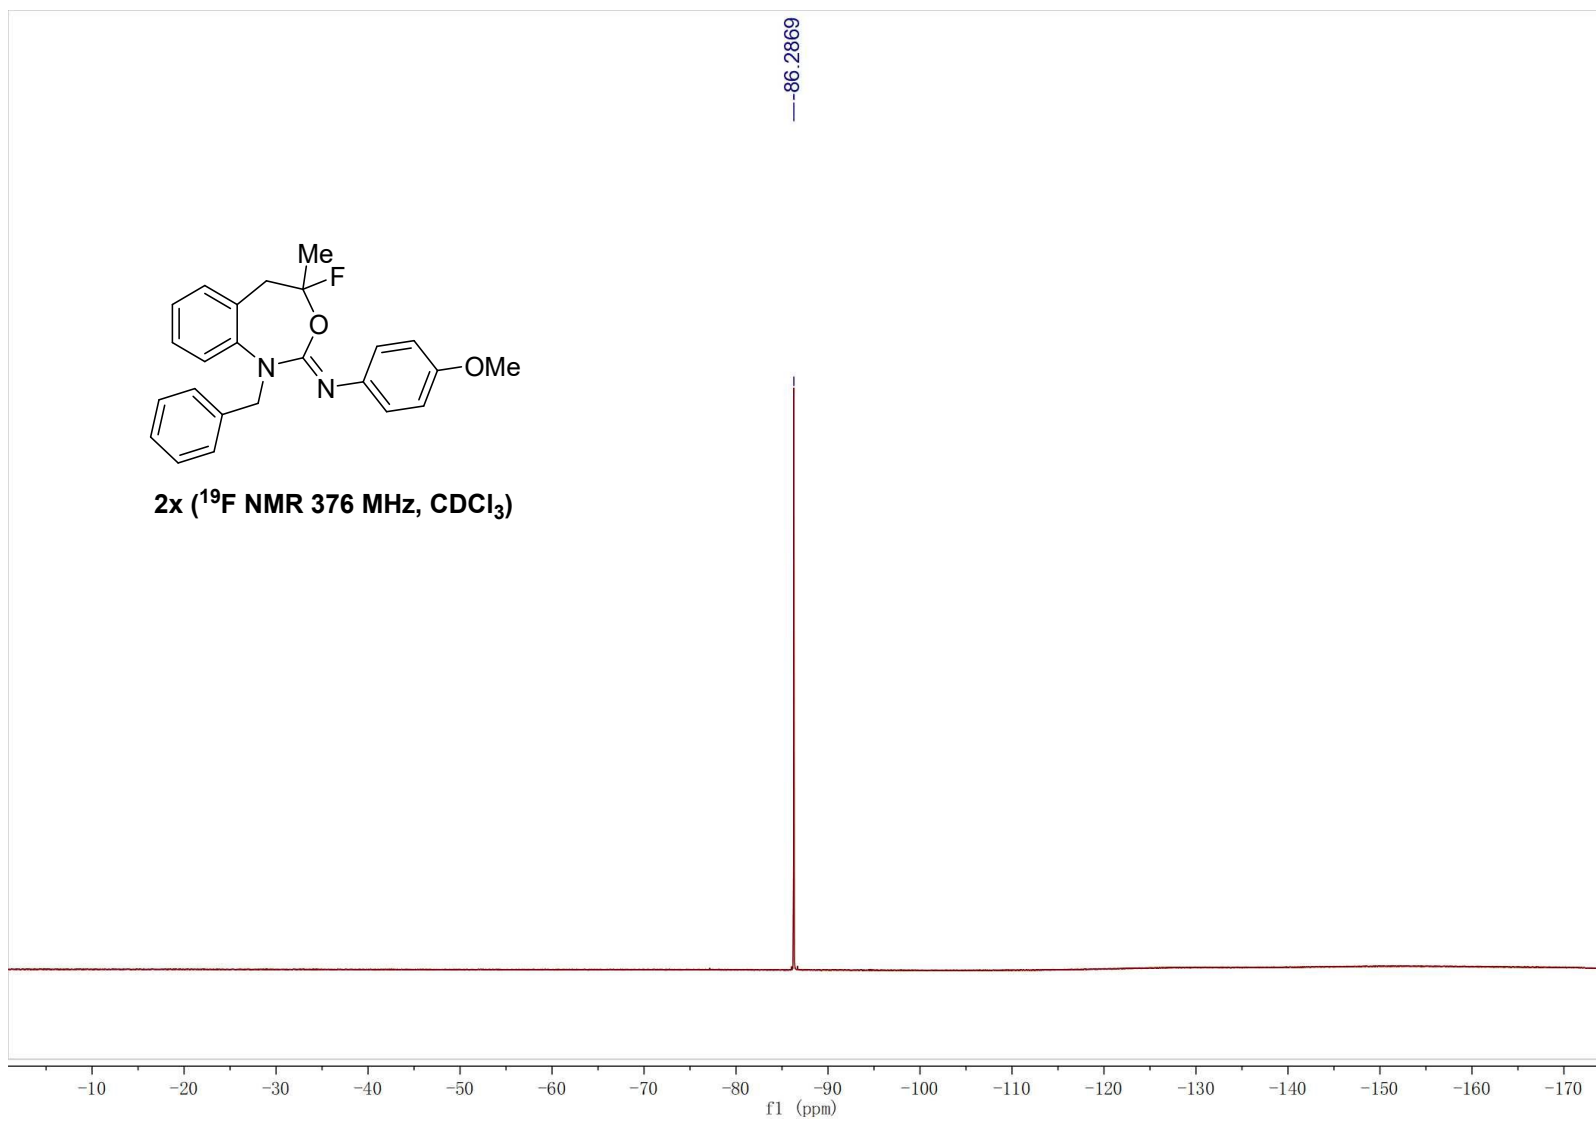

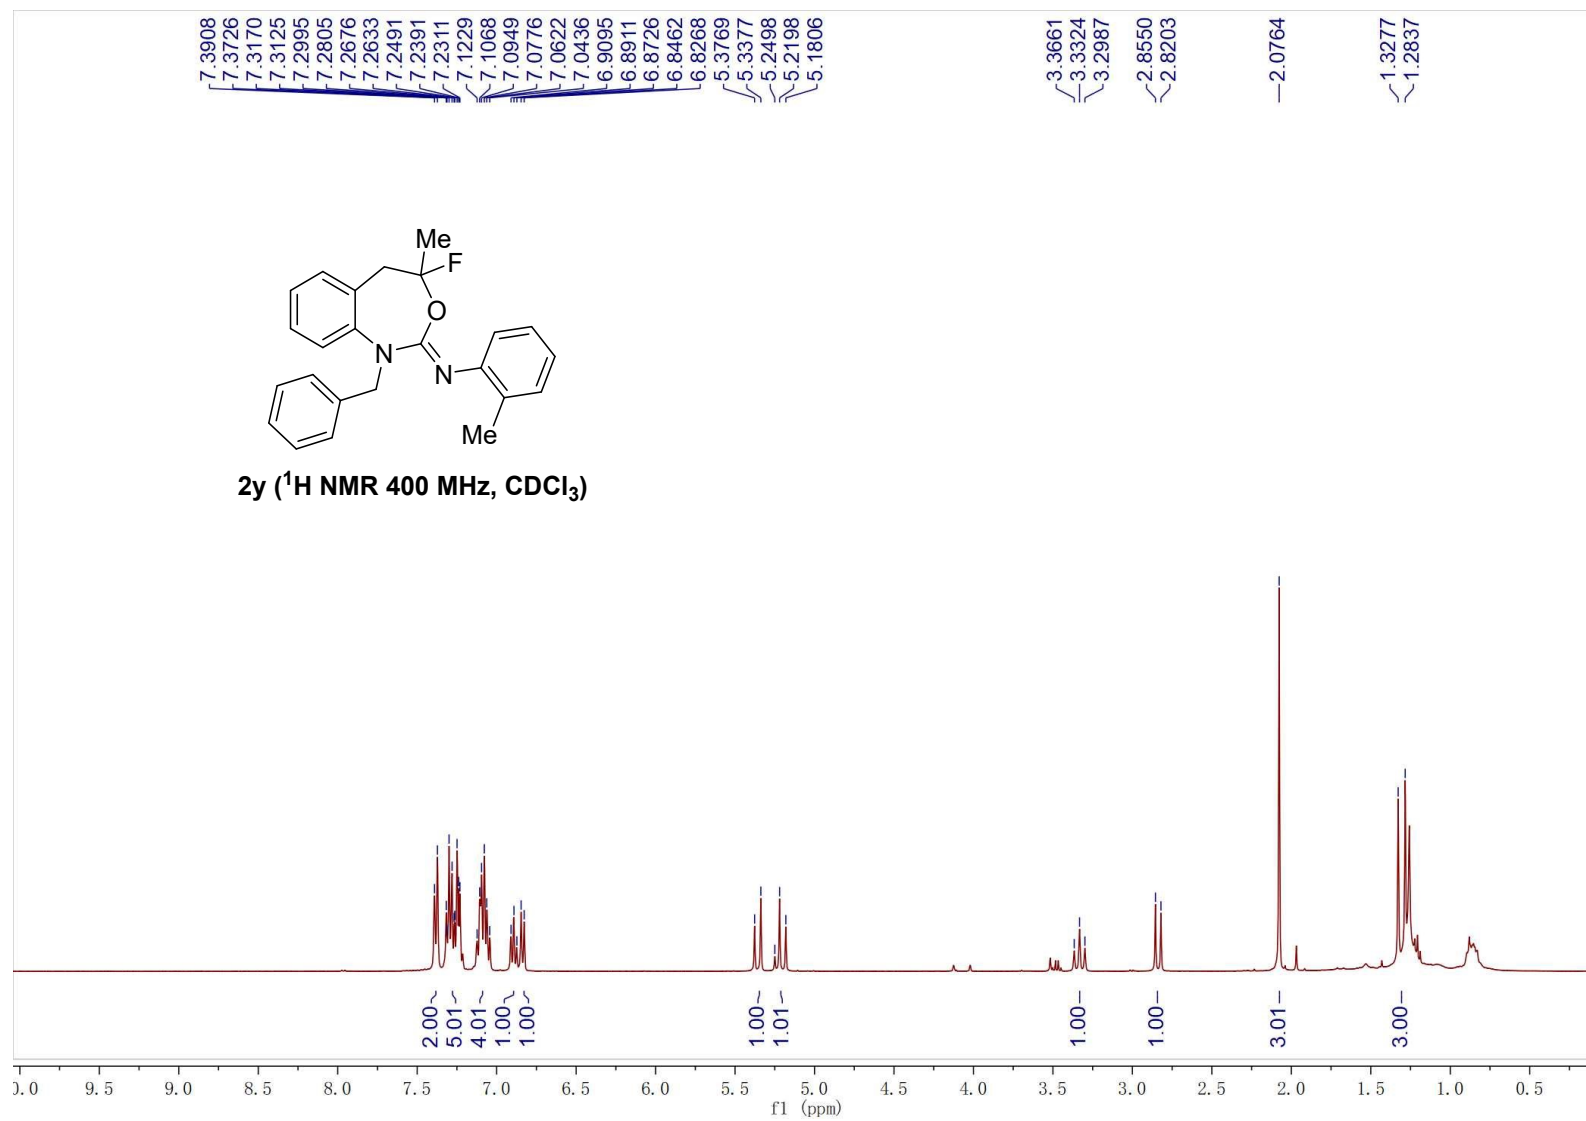

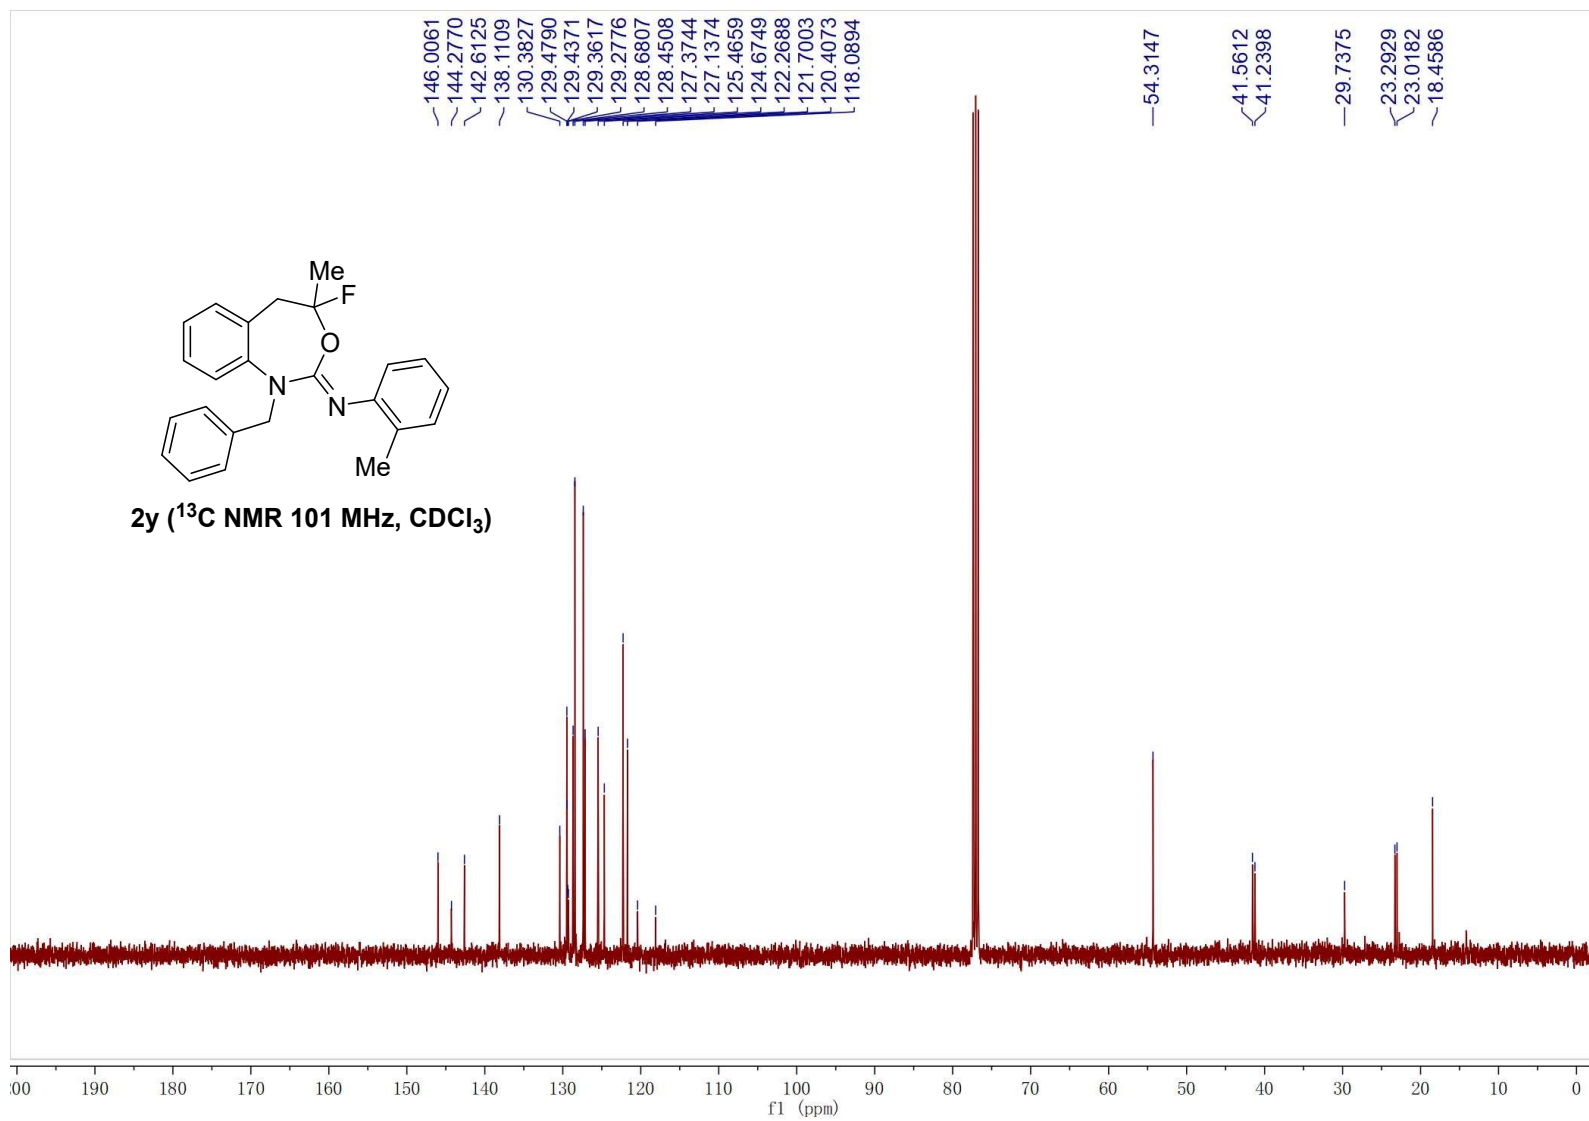

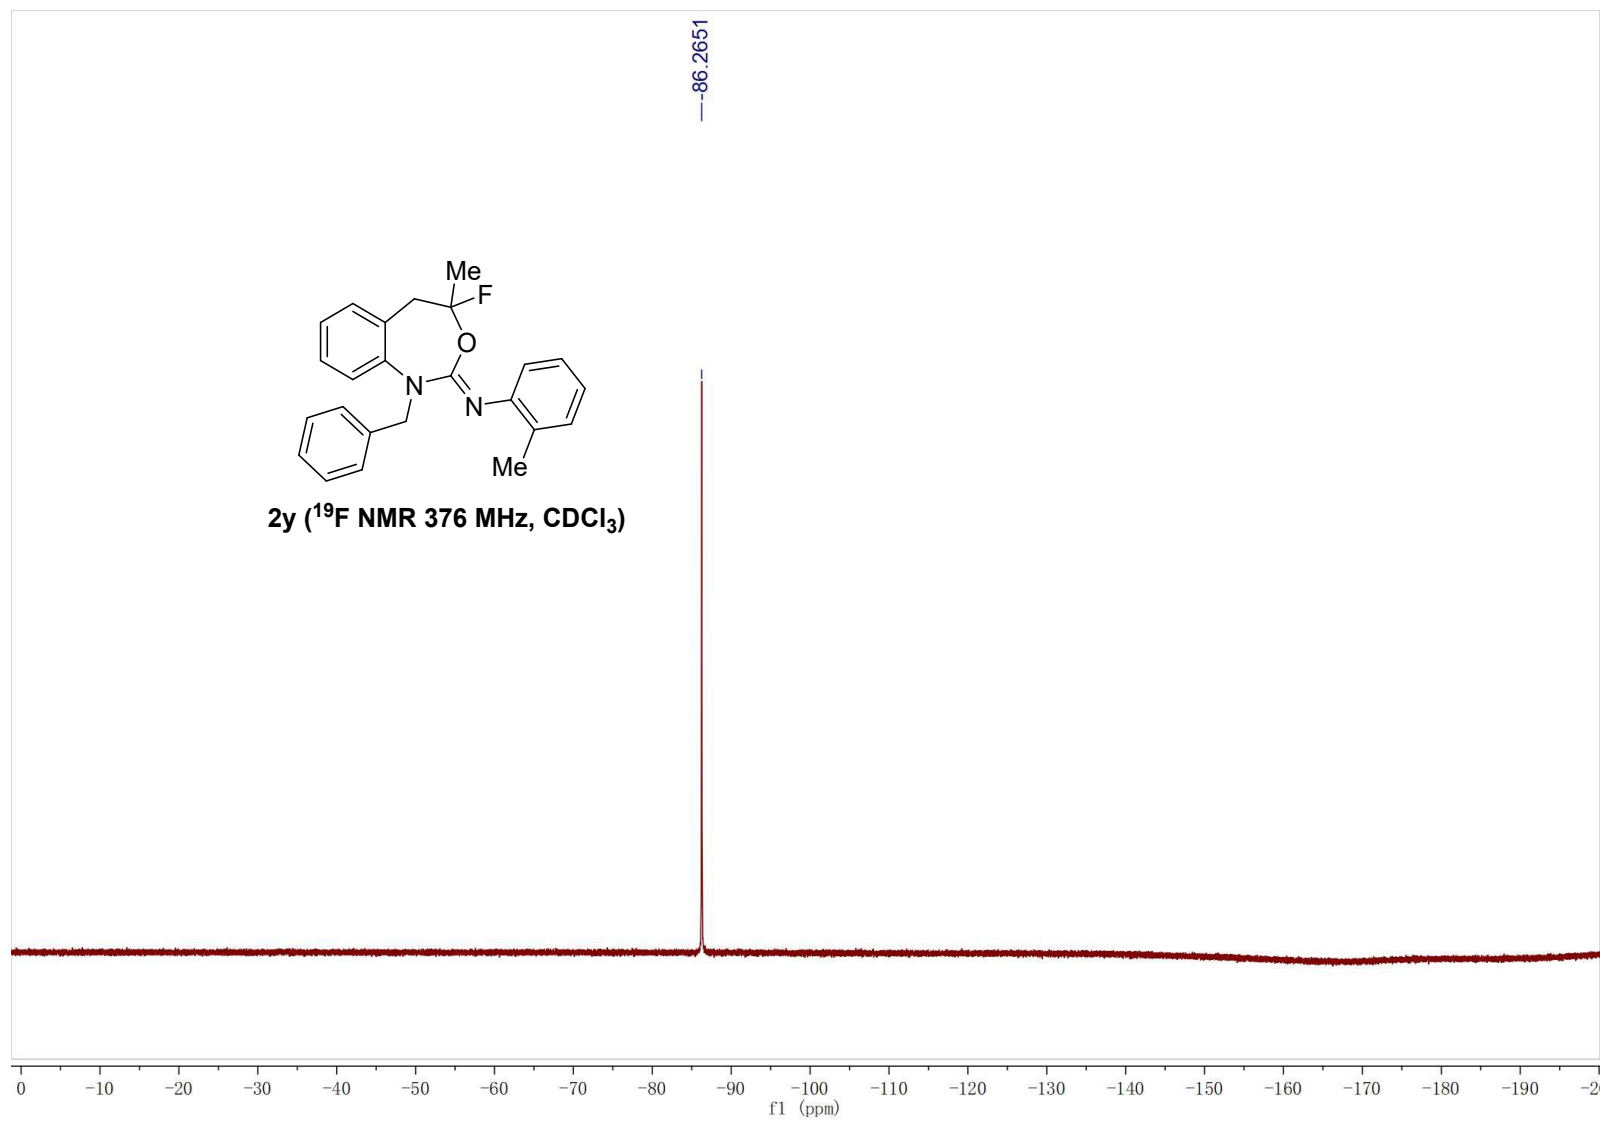

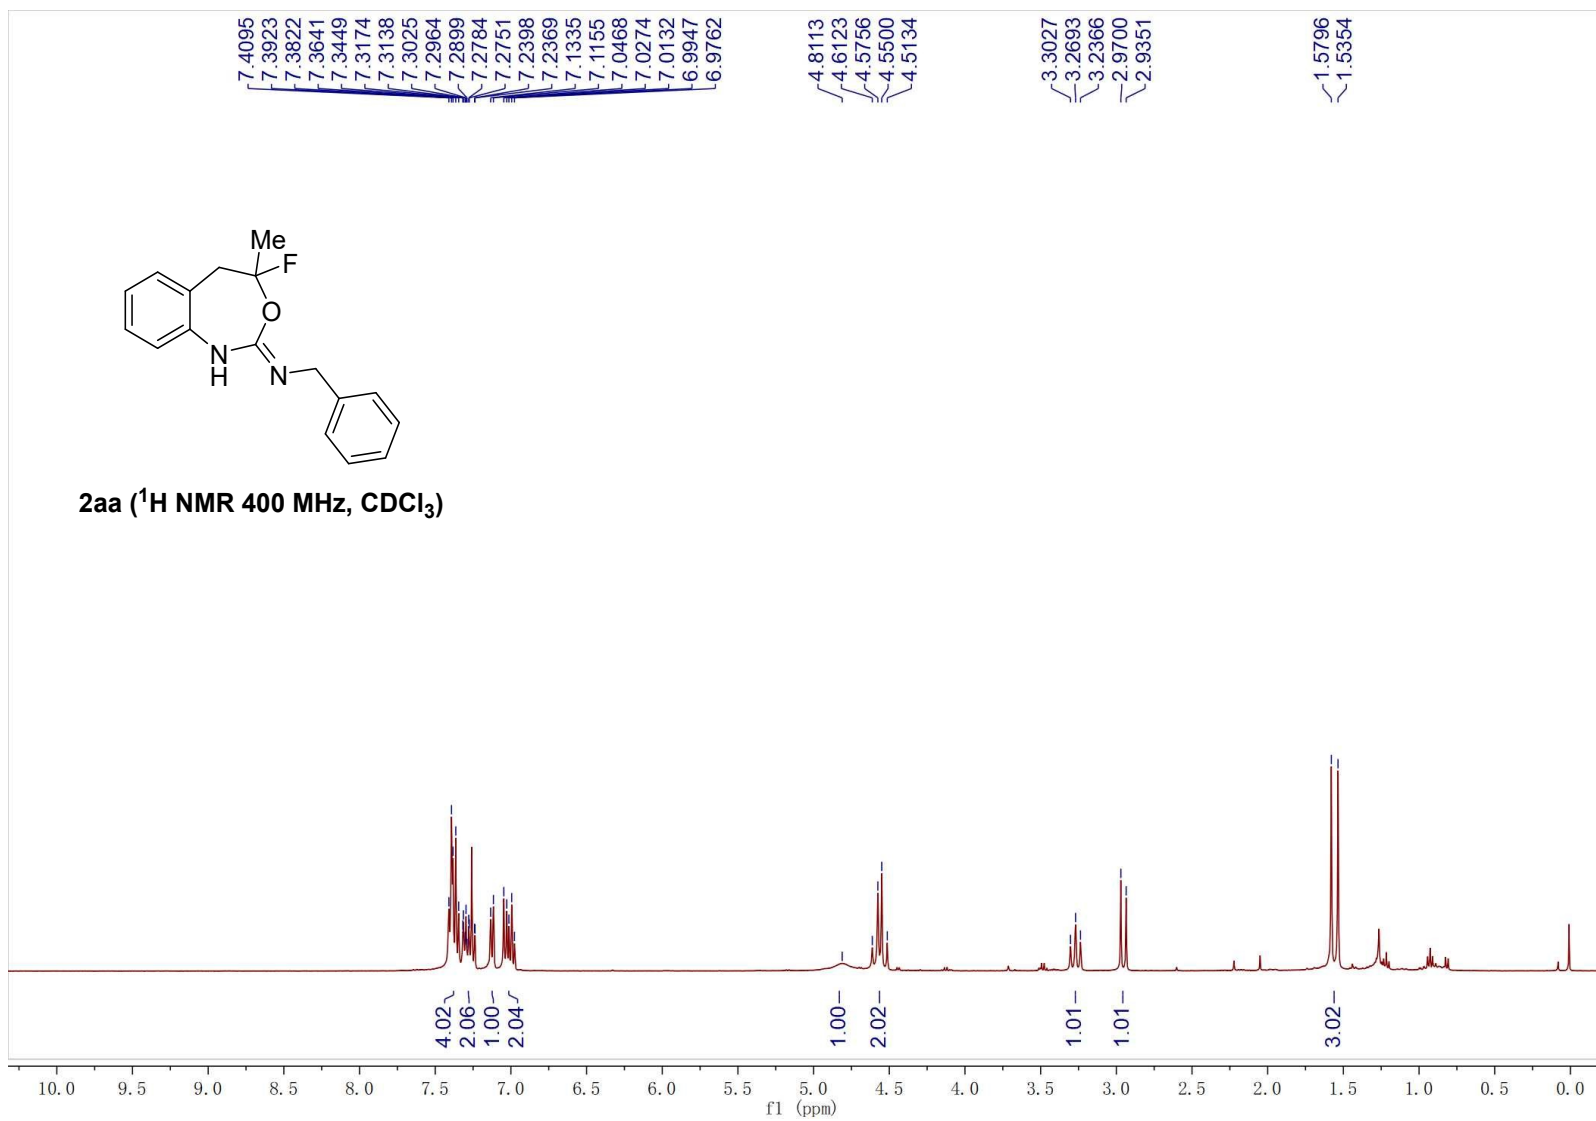

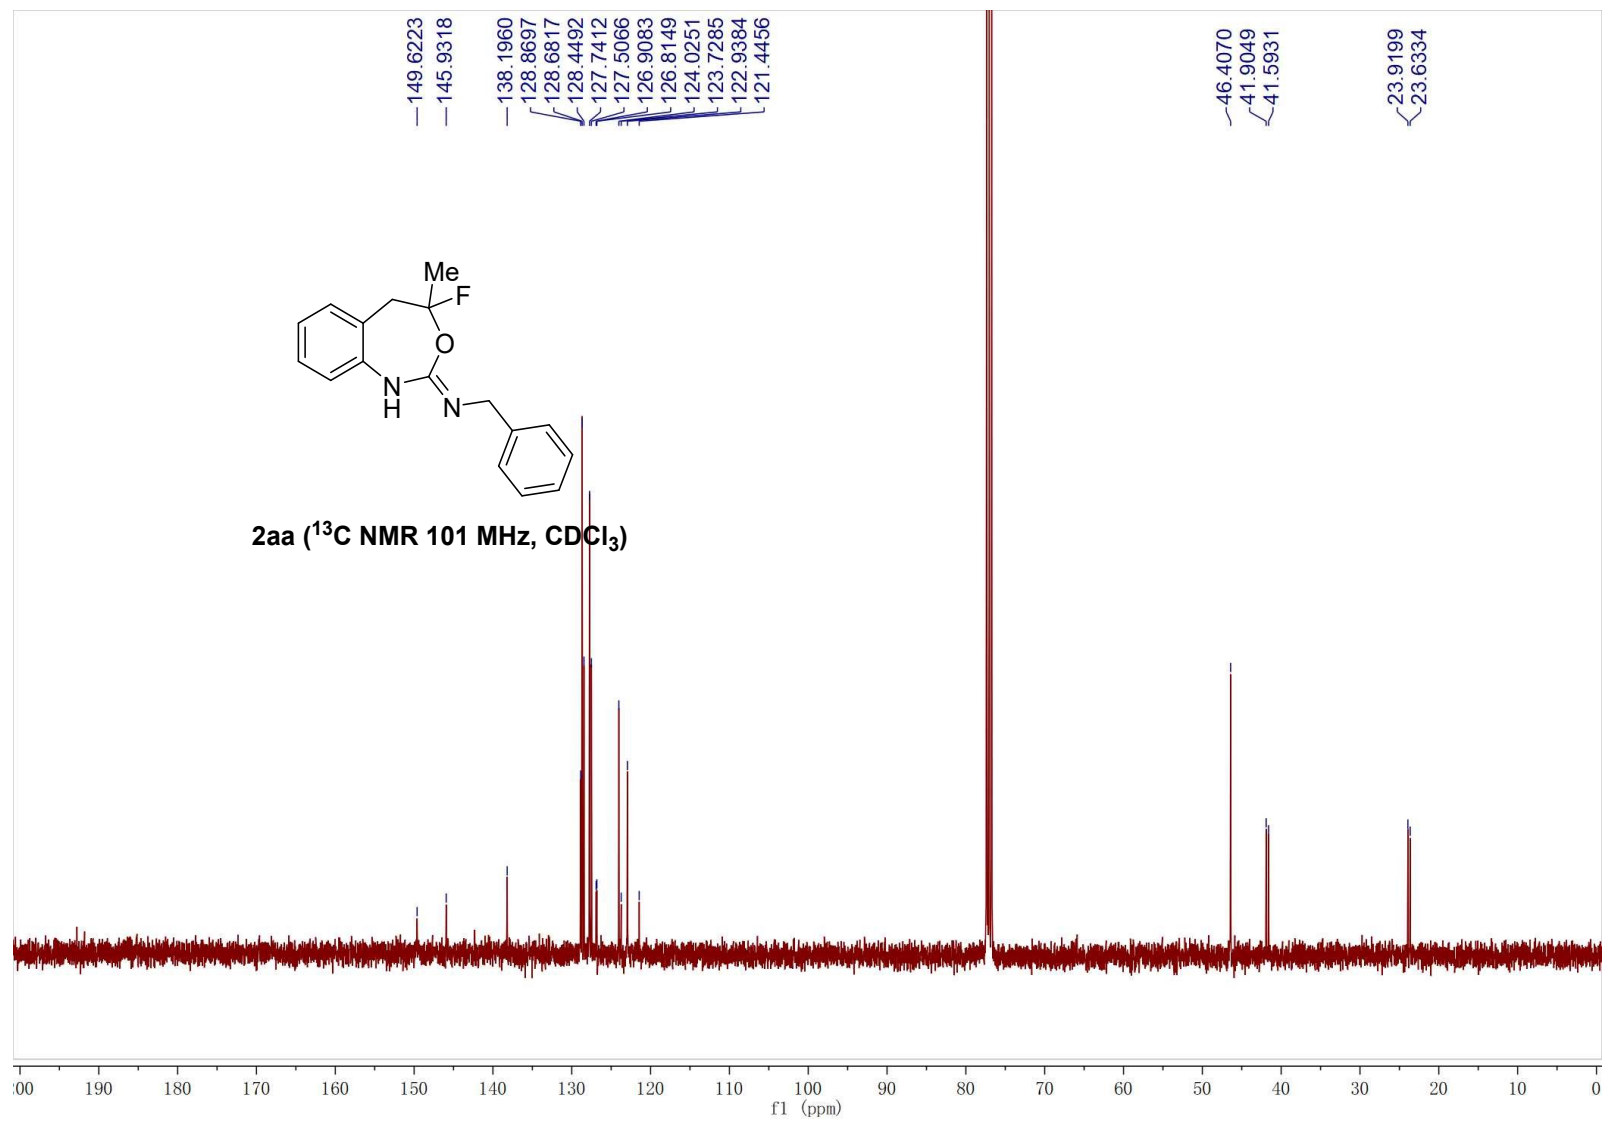

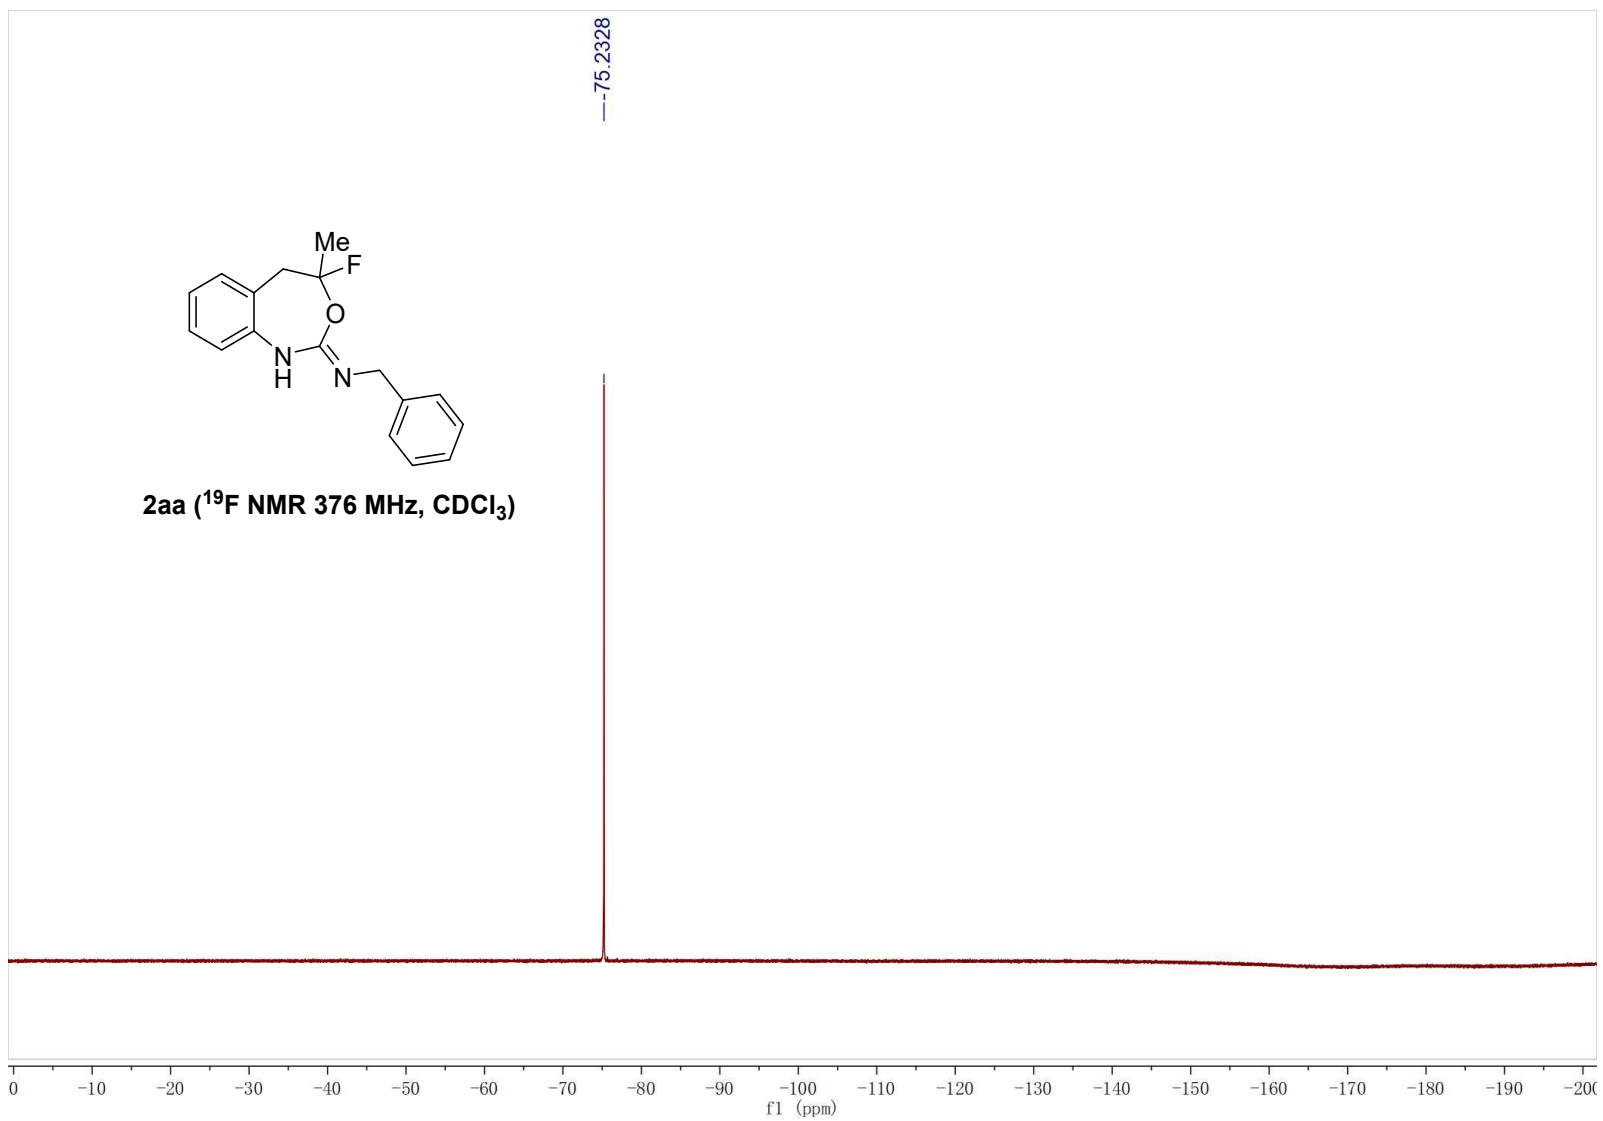

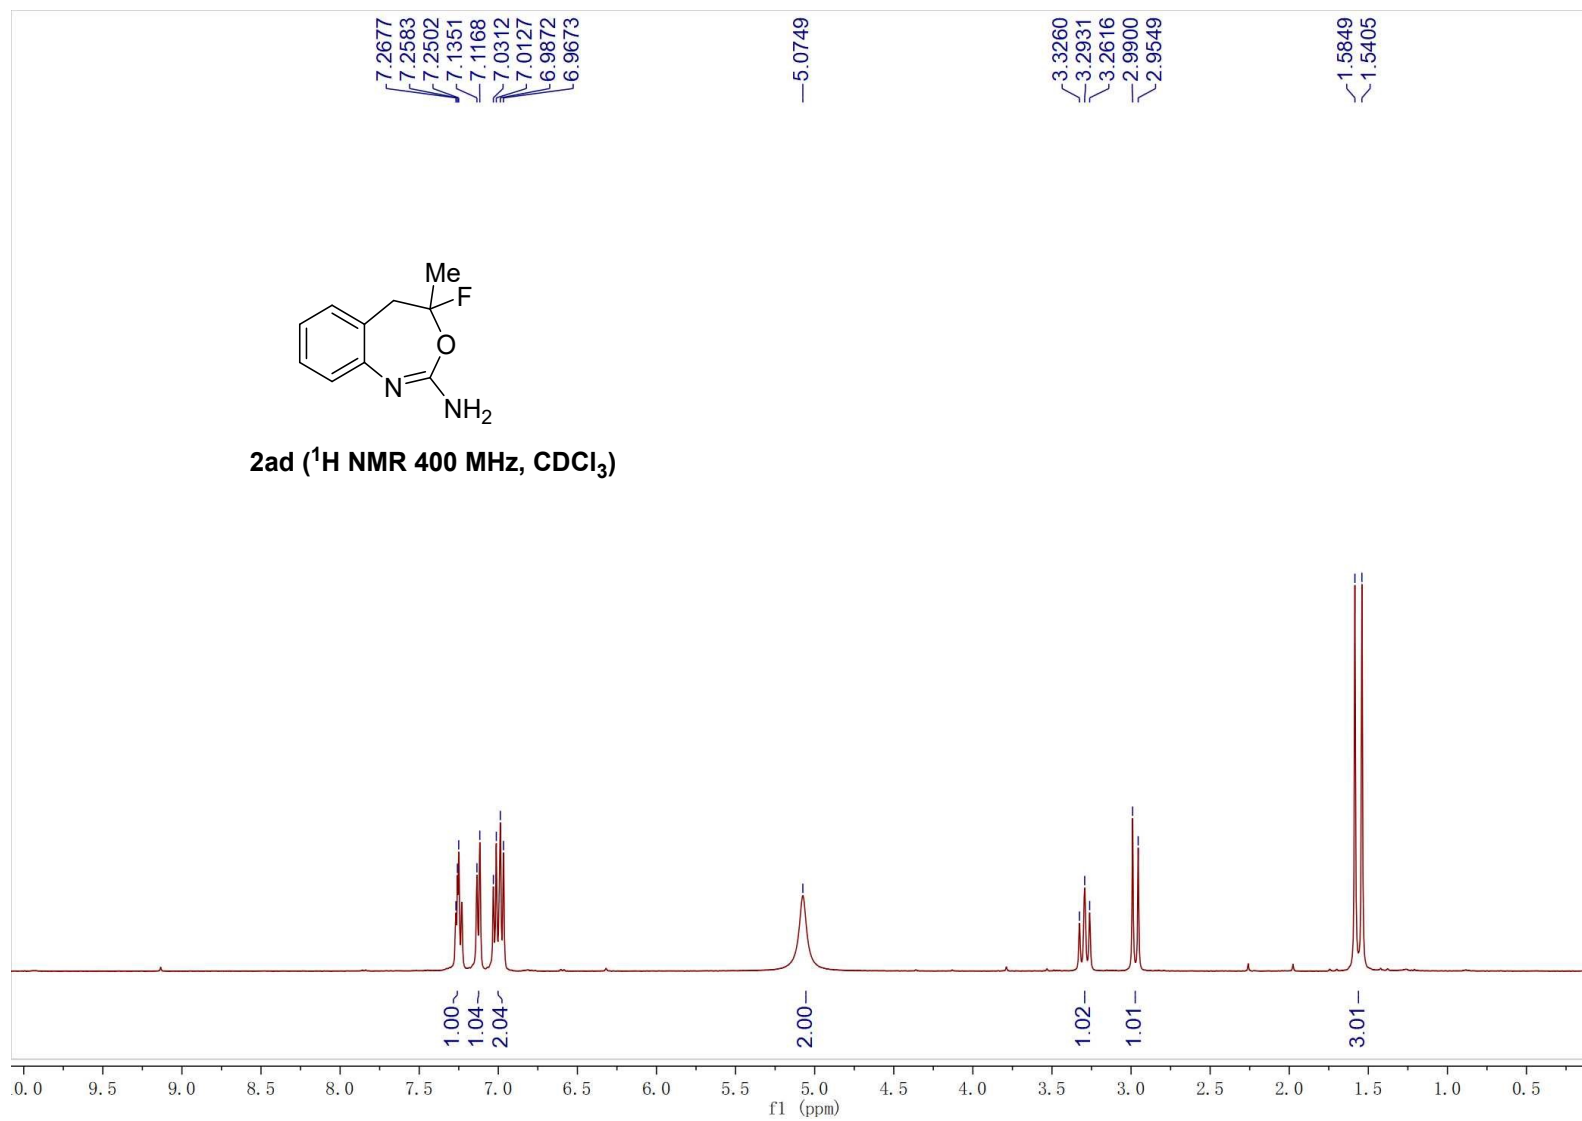



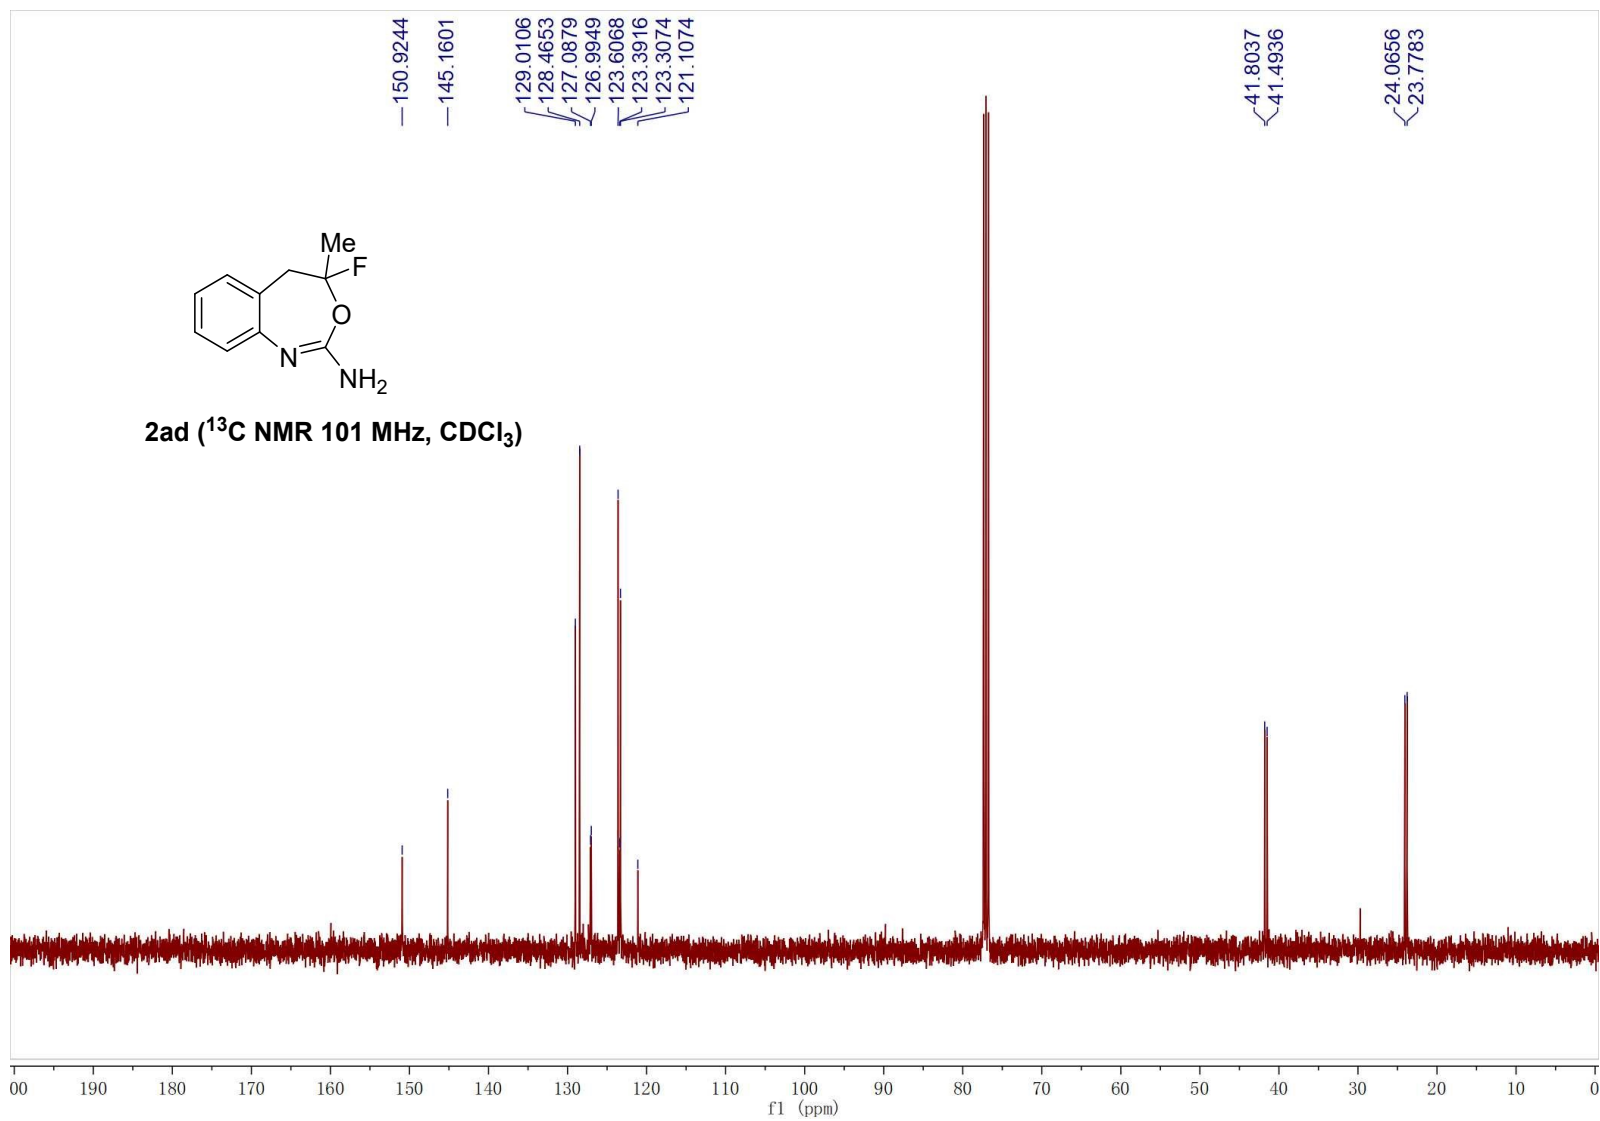

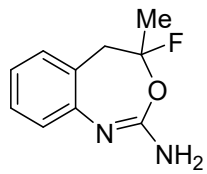

**2ad ( $^{19}\text{F}$  NMR 376 MHz,  $\text{CDCl}_3$ )**

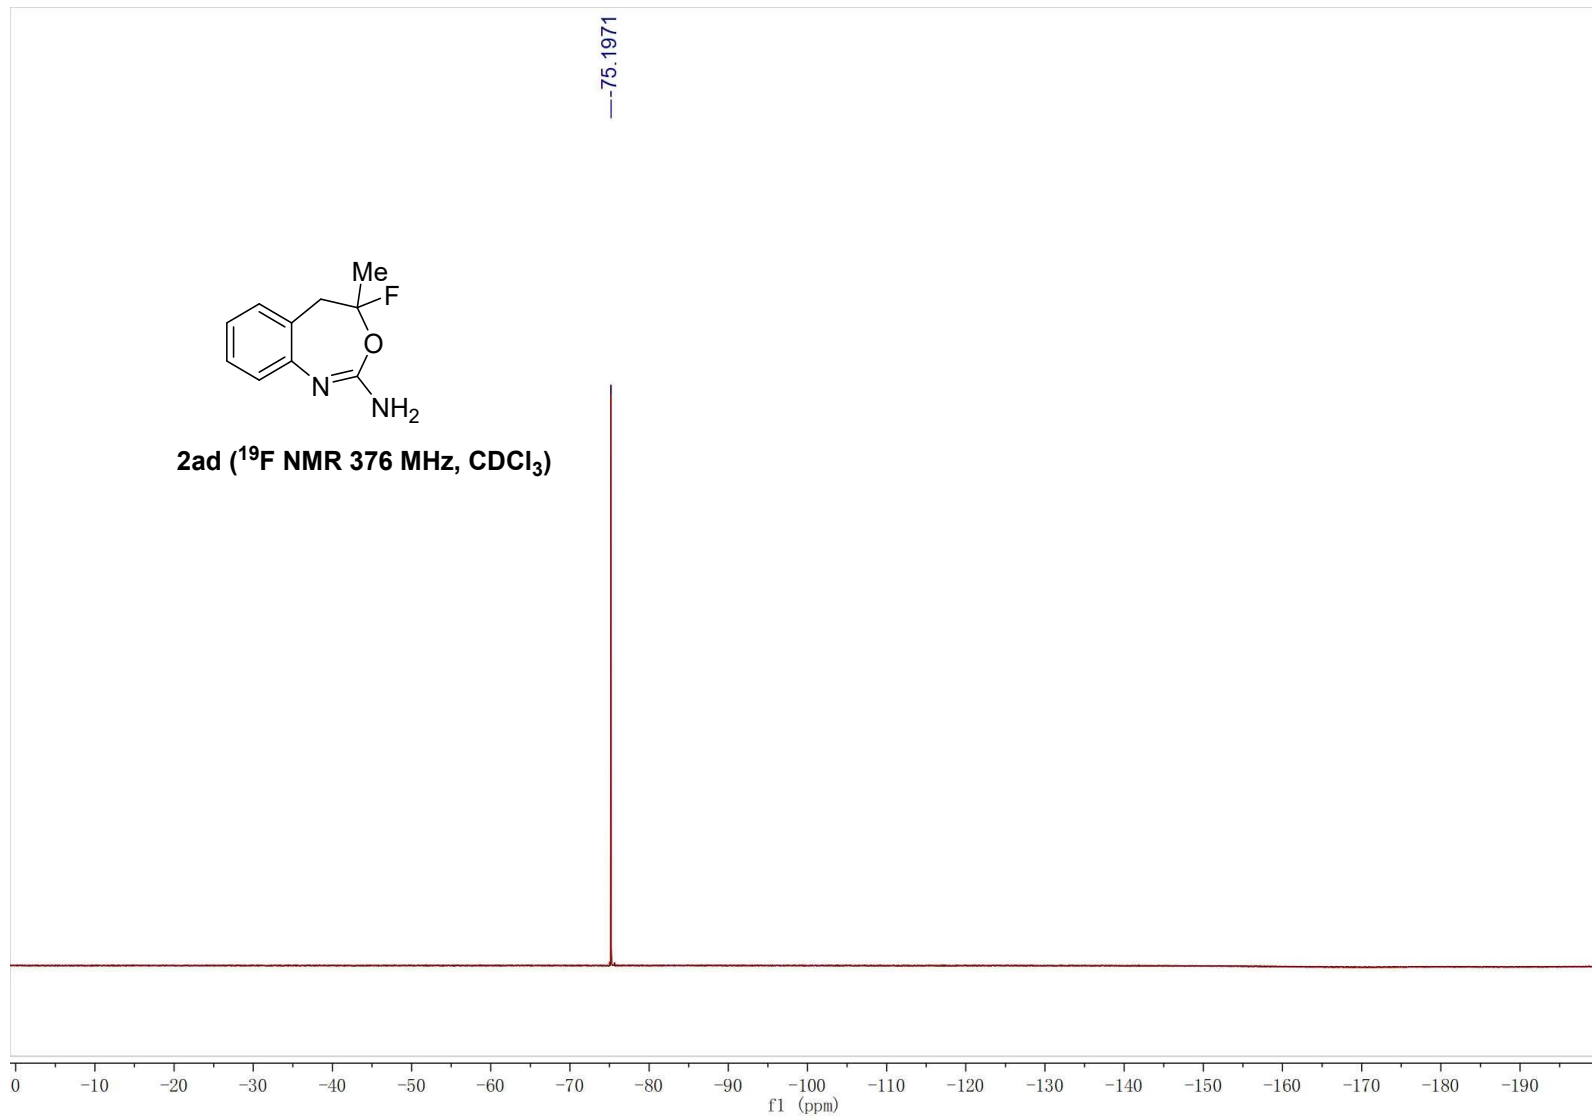

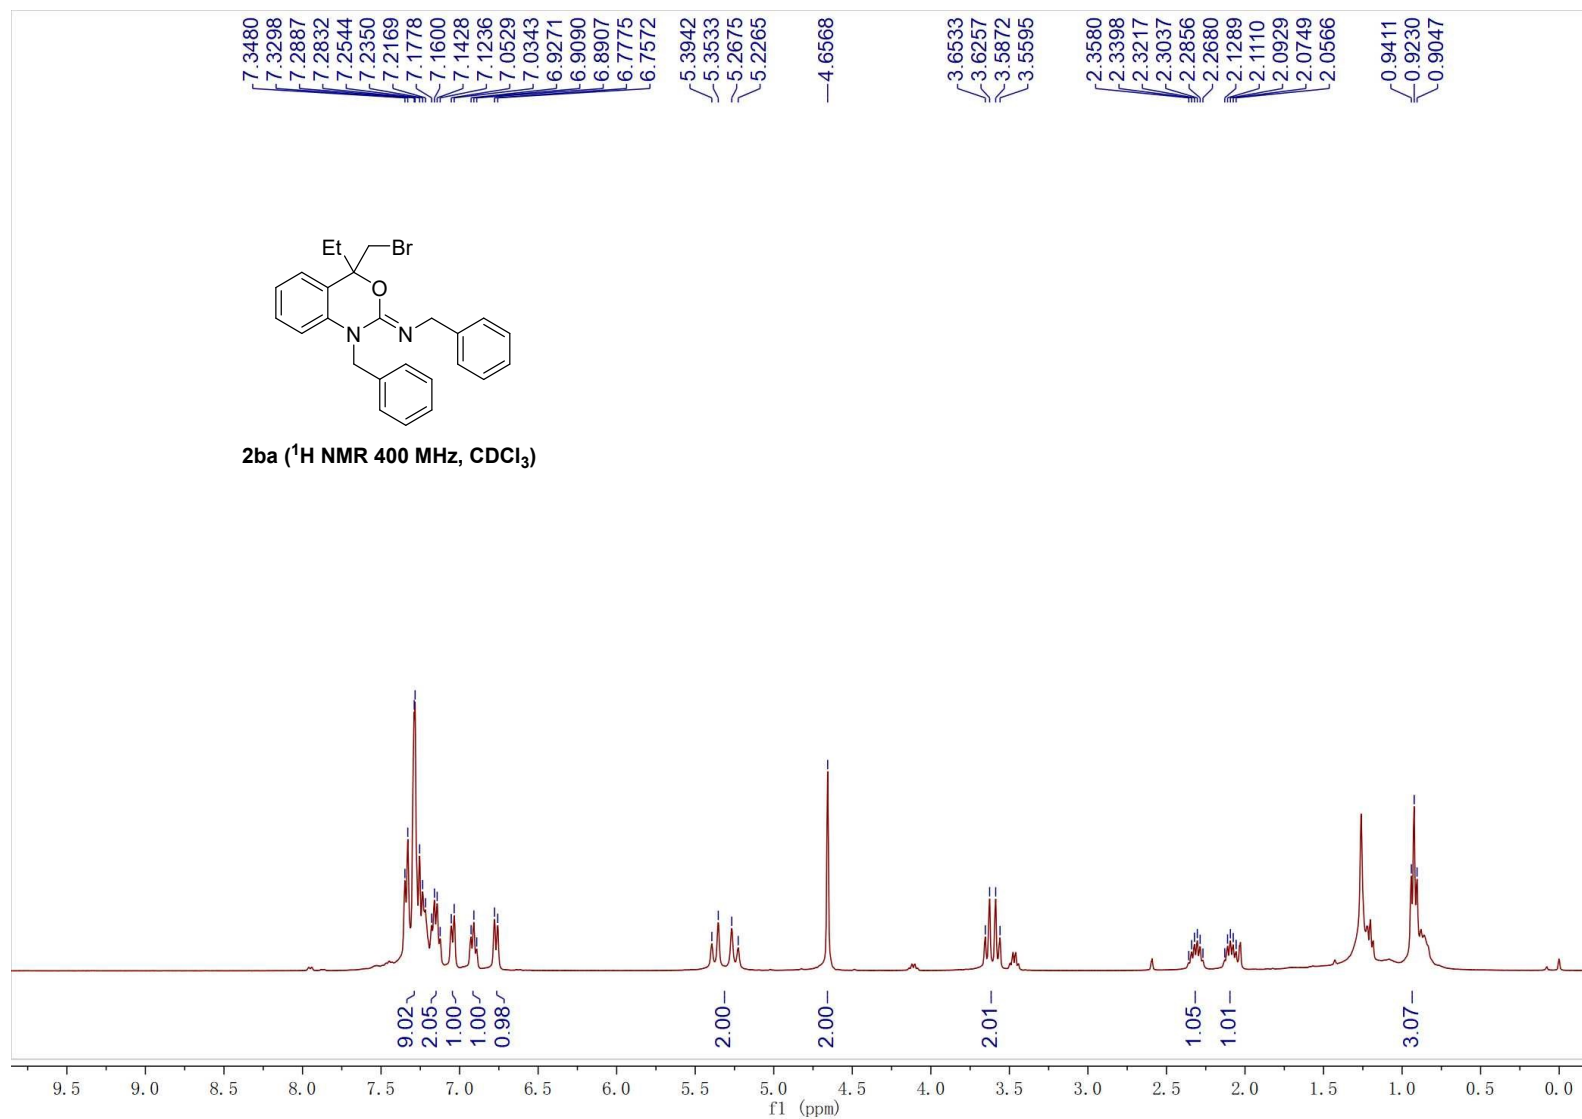

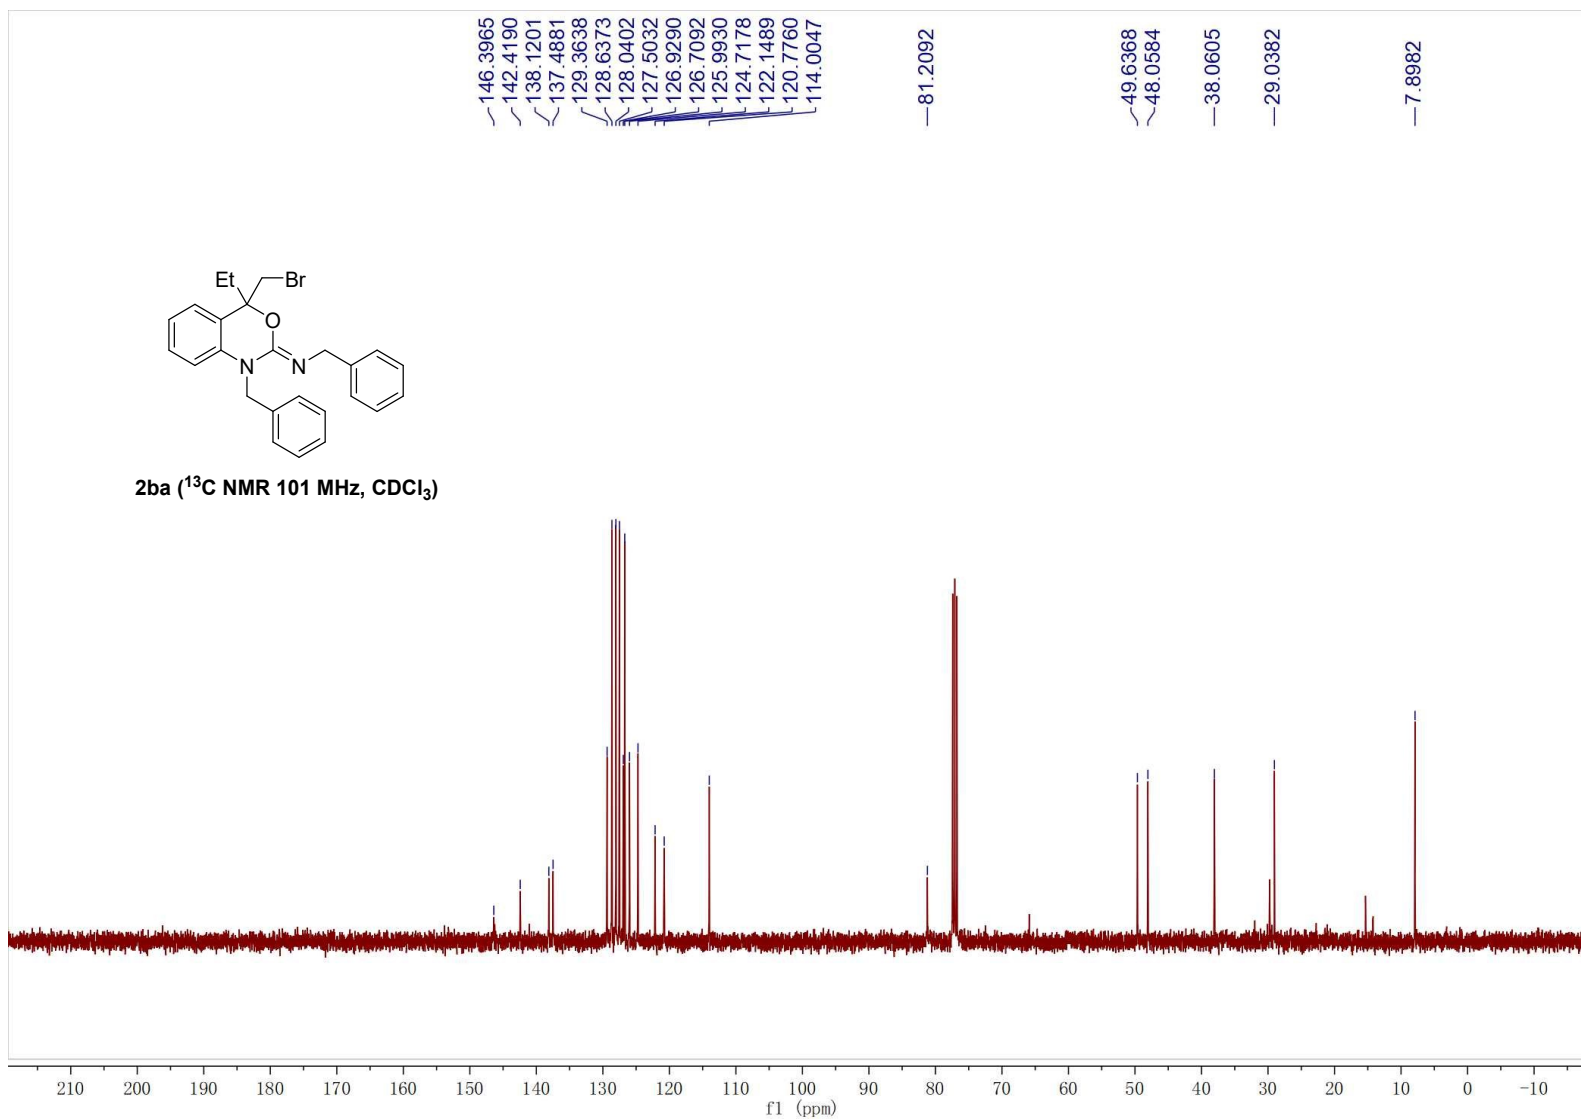

Supplement: d4qo00715h1.pdf [file d4qo00715h1.pdf]
